# Supplementary material for: Cross-Species Genomics Reveals Oncogenic Dependencies in ZFTA/C11orf95 Fusion–Positive Supratentorial Ependymomas
Source: Oxford University Press journal article supplement (doi:10.1158/2159-8290.cd-20-0963), 2021-04-20
Supplement: 21598290cd200963-sup-246541_2_supp_7021245_qrvsvx.xlsx [file 21598290cd200963-sup-246541_2_supp_7021245_qrvsvx.xlsx]

## Sheet: Legend
Supplementary Table S4: Histopathological evaluation of cases from the satellite clusters or ZFTA-RELA fusion-negative cases from ST-EPN-RELA
MP: microvascular proliferation
MPNST: malignant peripheral nerve sheath tumor
NET: neuroepithelial tumor
NOS: not otherwise specified
NA: not available

## Sheet: Supplementary Table S4
Reported diagnosis	Central Review	Fusion	Cluster	L1CAM	p65	cellularity	morphology	vessels	mitotic activity	necrosis	periv. rosettes	GFAP	EMA	Ki-67	H3K27me3
Ependymoma, NOS	Ependymoma (WHO II)	ZFTA:RELA Type 8	Cluster 1	positive (weak)	positive	high	widely monomorphic, epedymoma-like	discrete MP	low-moderate	absent	present
NA	Ependymoma (WHO II)	NA	Cluster 1	NA	NA	moderate-high	monomprphous, ependymoma-like	MP	low	absent	present
Embryonal tumor, NOS	high-grade NET	ZFTA:NCOA1	Cluster 2	NA	NA	moderate-high	heterogeneous areas, partially ependymoma-like, others clear cell or neurocytic	discrete MP	low-moderate	present	absent
Ependymoma (WHO III)	Ependymoma (WHO III)	ZFTA:NCOA2	Cluster 2	positive	NA	very high	largely monomorphic	MP	moderate	absent	absent
Ependymoma (WHO III)	Ependymoma (WHO III)	(1) ZFTA:MAML2	Cluster 2	NA	NA	high	widely monomorphic, partially primitive appearance	MP	high	present	discrete
Ependymoma (WHO III)	Ependymoma (WHO III)	ZFTA:MAML2	Cluster 2	positive	negative	moderate-high	clear cell aspect, focally pleomorphic, psammomatous clacifications	MP	moderate	present	focally	++	dot-like positive	up to 15%	retained
Ependymoma (WHO III)	Ependymoma (WHO III)	ZFTA:NCOA2	Cluster 2	positive	negative	very high	focally vacuolated cells	MP	high	present	present	++	dot-like positive	up to 20%	retained
Ependymoma (WHO III)	Ependymoma (WHO III)	ZFTA:MAML2	Cluster 2	positive	NA	high	slightly pleomorphic	hyalinized	moderate	present (very focally)	present
Ependymoma (WHO III)	Ependymoma (WHO III)	ZFTA:MAML2	Cluster 2	NA	NA	high	monomorphic, calcifications	MP	moderate	small foci of possible necrosis	present
Ependymoma (WHO III)	Ependymoma (WHO II)	ZFTA:MAML2	Cluster 2	NA	NA	high	monomorphic	inconspicious	low	absent	present
Ependymoma (WHO III)	Ependymoma (WHO II)	ZFTA:MAML2	Cluster 2	NA	NA	moderate	monomorphic	discrete MP	low	absent	present
Ependymoma (WHO III)	Ependymoma (WHO III)	ZFTA:NCOA2	Cluster 2	NA	NA	high	widely monomorphic, epedymoma-like	MP	moderate	present	present
Highgrade glioneural tumor	Ependymoma (WHO II)	MAML1:BEND2	Cluster 2	negative	negative	high	focally clear cell aspect	hyalinized	low-moderate	absent	present
Ependymoma (WHO III)	Ependymoma (WHO II)	ZFTA:RELA	Cluster 3	positive	negative	high	largely monomorphic	hyalinized	low-moderate	absent	absent
Ependymoma (WHO III)	Ependymoma (WHO III)	ZFTA:RELA	Cluster 3	NA	NA	high	largely monomorphic	hyalinized, focally MP	low-moderate	present (very focally)	absent
Ependymoma, NOS	Ependymoma (WHO II)	ZFTA:RELA	Cluster 3	positive	positive	high	clear cell aspect	thin	low	absent	absent
MPNST	high-grade tumor NOS	ZFTA:RELA	Cluster 3	positive	positive	high	clear cell aspect	thin	low-moderate	absent	absent
Chondrosarcoma	Ependymoma (WHO III)	ZFTA:RELA	Cluster 3	positive	weakly positive	high	focally clear cells aspect, vacuolated cells	hyalinized, focally MP	moderate	present	present	negative	dot-like positive	up to 15%	retained
Ependymoma (WHO III)	Ependymoma (WHO III)	no fusion detected	Cluster 4	NA	NA	high	pleomorphic, partially primitive appearance	extensive MP	high	present	absent
NA	high-grade NET	ZFTA:NCOA2	Cluster 4	positive	NA	moderate-high	small cells, partially chordoid morphology	focally MP	moderate	absent	absent
Undifferentiated sarcoma	high-grade NET	ZFTA:CTNNA2	Cluster 4	NA	positive	high	monomorphic	hyalinized	low	absent	absent
Ependymoma (WHO II)	Ependymoma (WHO II)	NA	Cluster 4	NA	NA	high	focally clear cells aspect, vacuolated cells	MP	moderate	present	focally
Ependymoma (WHO III)	Ependymoma (WHO II)	SYVN1:MAJIN	ST-EPN-RELA	positive	NA	moderate-high	clear cell aspect	hyalinized, focally MP	low-moderate	absent	absent
Ependymoma, NOS	Ependymoma (WHO II)	ZFTA:SS18	ST-EPN-RELA	positive	NA	high	very pleomorphic, vacuolated cells	hyalinized	moderate	absent	focally
Ependymoma (WHO III)	Ependymoma (WHO III)	ZFTA:RELA	ST-EPN-RELA	positive	weakly positive	high	largely monomorphic	hyalinized, focally MP	moderate	absent	present
