# Supplementary material for: Cross-Species Genomics Reveals Oncogenic Dependencies in ZFTA/C11orf95 Fusion–Positive Supratentorial Ependymomas
Source: Oxford University Press journal article supplement (doi:10.1158/2159-8290.cd-20-0963), 2021-04-20
Supplement: 21598290cd200963-sup-246541_2_supp_7042971_qr3nv4.xlsx [file 21598290cd200963-sup-246541_2_supp_7042971_qr3nv4.xlsx]

## Sheet: Legend
Supplementary Table S1. A summary of the human cohort used for DNA methylation-profiling
Material meth. profiling	DNA_FF: DNA extracted from fresh frozen tissue; DNA_FFPE: DNA extracted from formalin-fixed paraffin-embedded tissue
Array	Array used for DNA-methylation profiling
Prediction	DNA-methylation reference class for which the hightest score could be obtained (see: https://www.molecularneuropathology.org/mnp/classifier/2)
max. cal. score	Corresponding calibrated score to the respective prediction. Scores ≥0.9 are considered as significant
Cluster	Cluster to which the sample was assigned in the HDBSCAN. Outliers could not be assigned with high confidence to any of the five clusters (see Suppl. Fig. 1)
Exploratory sample?	Samples that were used to screen the DKFZ brain tumor classifier databse for additional cases and fulfilled one of three following conditions: cat i) prediction for ST-EPN-RELA according to DNA methylation-based classification but without evidence for a canonical C11orf95-RELA fusion; cat ii) typical fusion event in the absence of a reliable ST-EPN-RELA score; cat iii) supratentorial tumors histo…
Fusion	Fusion event that was detected in the respective sample
Detection method	Method that was used for fusion detection; RNA-seq. (FF): RNA-seq. on RNA extracted from fresh frozen tissue; RNA-seq. (FFPE): RNA-seq. on RNA extracted from fromalin-fixed paraffin-embedded tissue; RT-PCR: Reverse Transcriptase PCR; DNA-panel seq.; NA: Detection method not available, e. g. for external cases
Other methods	Other methods that were applied on the same sample
Reported histology	Histology reported by the referring center
RT-PCR data from previous study	Indicates whether RT-PCR data from previous studies was included
RNA-seq. data from previous study	Indicates whether RNA-seq. data from previous studies was included

## Sheet: Supplementary Table S1
Material meth. profiling	Array	Prediction	max. cal. score	Cluster	Exploratory sample?	Fusion	Detection method	Other methods	Reported histology	RT-PCR data from previous study	RNA-seq. data from previous study
DNA_KRYO	IlluminaHumanMethylation450k	EPN, RELA	0.976855	Cluster 1					Ependymoma (WHO III)
DNA_FFPE	IlluminaHumanMethylation450k	EPN, RELA	0.99707	Cluster 1	yes (cat. i)	ZFTA-RELA Type 8	RNA-seq. (FFPE)
DNA_KRYO	IlluminaHumanMethylationEPIC	EPN, RELA	0.988682	Cluster 1					Ependymoma (WHO III)
DNA_KRYO	IlluminaHumanMethylationEPIC	EPN, RELA	0.980455	Cluster 1
DNA_FFPE	IlluminaHumanMethylationEPIC	EPN, RELA	0.994748	Cluster 1
DNA_KRYO	IlluminaHumanMethylation450k	EPN, RELA	0.999047	Cluster 1					Ependymoma (WHO III)
DNA_FFPE	IlluminaHumanMethylation450k	EPN, RELA	0.999299	Cluster 1					Ependymoma (WHO III)
DNA_KRYO	IlluminaHumanMethylation450k	EPN, RELA	0.928349	Cluster 1
DNA_KRYO	IlluminaHumanMethylation450k	EPN, RELA	0.993855	Cluster 1	yes (cat. i)	ZFTA-RELA Type 8	RNA-seq. (FF)		Ependymoma, NOS
DNA_FFPE	IlluminaHumanMethylation450k	EPN, RELA	0.677538	Cluster 2
DNA_FFPE	IlluminaHumanMethylation450k	EPN, RELA	0.973284	Cluster 2		ZFTA-MAML2	DNA-panel seq.		Ependymoma (WHO III)
DNA_FFPE	IlluminaHumanMethylation450k	EPN, RELA	0.417611	Cluster 2					Ependymoma (WHO III)
DNA_FFPE	IlluminaHumanMethylation450k	EPN, RELA	0.961006	Cluster 2					Ependymoma (WHO III)
DNA_FFPE	IlluminaHumanMethylation450k	EPN, RELA	0.497606	Cluster 2	Yes (cat. iii)	ZFTA-MAML2	DNA-panel seq.		Ependymoma (WHO III)
DNA_FFPE	IlluminaHumanMethylation450k	EPN, RELA	0.972657	Cluster 2		ZFTA-NCOA1	DNA-panel seq.		Ependymoma (WHO III)
DNA_FFPE	IlluminaHumanMethylationEPIC	EPN, RELA	0.706543	Cluster 2					Ependymoma (WHO III)
DNA_FFPE	IlluminaHumanMethylation450k	EPN, RELA	0.295325	Cluster 2	Yes (cat. iii)	ZFTA-MAML2	RNA-seq. (FFPE)	DNA-panel seq.	Ependymoma (WHO III)
DNA_FFPE	IlluminaHumanMethylationEPIC	EPN, RELA	0.985953	Cluster 2
DNA_FFPE	IlluminaHumanMethylationEPIC	EPN, RELA	0.997225	Cluster 2					Ependymoma (WHO III)
DNA_FFPE	IlluminaHumanMethylationEPIC	EPN, RELA	0.918498	Cluster 2	Yes (cat. i/iii)	ZFTA-MAML2	RNA-seq. (FFPE)	DNA-panel seq.	Ependymoma, NOS
DNA_FFPE	IlluminaHumanMethylationEPIC	EPN, RELA	0.952274	Cluster 2					Ependymoma, NOS
DNA_FFPE	IlluminaHumanMethylationEPIC	EPN, RELA	0.618983	Cluster 2
DNA_FFPE	IlluminaHumanMethylationEPIC	EPN, RELA	0.990853	Cluster 2					Ependymoma (WHO III)
DNA_FFPE	IlluminaHumanMethylationEPIC	EPN, RELA	0.565094	Cluster 2					Ependymoma (WHO III)
DNA_FFPE	IlluminaHumanMethylationEPIC	EPN, RELA	0.925039	Cluster 2					Ependymoma, NOS
DNA_FFPE	IlluminaHumanMethylationEPIC	EPN, RELA	0.964968	Cluster 2					Ependymoma, NOS
DNA_FFPE	IlluminaHumanMethylationEPIC	EPN, RELA	0.99895	Cluster 2					Ependymoma, NOS
DNA_FFPE	IlluminaHumanMethylationEPIC	EPN, RELA	0.990855	Cluster 2					Ependymoma, NOS
DNA_FFPE	IlluminaHumanMethylationEPIC	EPN, RELA	0.869157	Cluster 2					Ependymoma, NOS
DNA_FFPE	IlluminaHumanMethylationEPIC	EPN, RELA	0.871501	Cluster 2		ZFTA-MAML2	DNA-panel seq.		Ependymoma (WHO III)
DNA_FFPE	IlluminaHumanMethylationEPIC	EPN, RELA	0.984509	Cluster 2		ZFTA-NCOA1	RNA-seq. (FFPE)		Embryonal tumor, NOS
DNA_FFPE	IlluminaHumanMethylationEPIC	EPN, RELA	0.609869	Cluster 2					Highly proliferative round cell tumor (partly glial differentiated)
DNA_FFPE	IlluminaHumanMethylationEPIC	EPN, RELA	0.162139	Cluster 2		MAML1-BEND2	Seq., NOS		Highgrade glioneural tumor
DNA_FFPE	IlluminaHumanMethylationEPIC	EPN, RELA	0.862283	Cluster 2		ZFTA-NCOA2	DNA-panel seq.		Ependymoma (WHO III)
DNA_FFPE	IlluminaHumanMethylationEPIC	EPN, RELA	0.944688	Cluster 2		ZFTA-NCOA2	RNA-seq. (FFPE)		Ependymoma (WHO III)
DNA_FFPE	IlluminaHumanMethylation450k	EPN, RELA	0.950413	Cluster 2	yes (cat. i)	ZFTA-NCOA2	RNA-seq. (FFPE)
DNA_FFPE	IlluminaHumanMethylation450k	EPN, RELA	0.957131	Cluster 2		ZFTA-MAML2	DNA-panel seq.		Ependymoma (WHO III)
DNA_FFPE	IlluminaHumanMethylation450k	EPN, RELA	0.93718	Cluster 2		ZFTA-MAML2	DNA-panel seq.		Ependymoma (WHO III)
DNA_FFPE	IlluminaHumanMethylation450k	EPN, RELA	0.511282	Cluster 2		ZFTA-MAML2	DNA-panel seq.		Ependymoma (WHO III)
DNA_KRYO	IlluminaHumanMethylation450k	EPN, RELA	0.965989	Cluster 2					Ependymoma (WHO III)
DNA_FFPE	IlluminaHumanMethylation450k	EPN, RELA	0.99993	Cluster 2					Ependymoma, NOS
DNA_FFPE	IlluminaHumanMethylation450k	EPN, RELA	0.92901	Cluster 2	Yes (cat. i/iii)	ZFTA-MAML2	RNA-seq. (FFPE)	DNA-panel seq.	Ependymoma (WHO III)
DNA_FFPE	IlluminaHumanMethylation450k	EPN, RELA	0.990143	Cluster 2		ZFTA-NCOA2	RNA-seq. (FFPE)	DNA-panel seq.	Ependymoma (WHO III)
DNA_FFPE	IlluminaHumanMethylation450k	EPN, RELA	0.714252	Cluster 2					Ependymoma, NOS
DNA_FFPE	IlluminaHumanMethylation450k	EPN, RELA	0.834668	Cluster 2					Glioblastoma (WHO IV)
DNA_FFPE	IlluminaHumanMethylation450k	EPN, RELA	0.391066	Cluster 2		ZFTA-MAML2	DNA-panel seq.		Ependymoma (WHO III)
DNA_FFPE	IlluminaHumanMethylation450k	SUBEPN, PF	0.232914	Cluster 2		no fusion detected	RNA-seq. (FFPE)
DNA_FFPE	IlluminaHumanMethylationEPIC	EPN, RELA	0.168298	Cluster 2		ZFTA-MAML2	DNA-panel seq.		Ependymoma (WHO III)
DNA_KRYO	IlluminaHumanMethylation450k	EPN, RELA	0.705935	Cluster 2	yes (cat. iii)	ZFTA-MAML2	RNA-seq. (FF)	RT-PCR	Ependymoma (WHO III)	Pajtler et al., Cancer Cell, 2015
DNA_KRYO	IlluminaHumanMethylation450k	EPN, RELA	0.957912	Cluster 2	yes (cat. i/iii)	ZFTA-NCOA2	RNA-seq. (FF)	RT-PCR	Ependymoma (WHO III)
DNA_KRYO	IlluminaHumanMethylation450k	EPN, RELA	0.875876	Cluster 2	yes (cat. iii)	(1) CCND1-RP11-379J13.2(148),RP11-684B2.1(173197), (2) CCND1-RNA5SP347(192838),RP11-379J13.2(28361), (3) KDM2A-POLA2	RNA-seq. (FF)	RT-PCR	Ependymoma (WHO III)
DNA_KRYO	IlluminaHumanMethylation450k	EPN, RELA	0.254491	Cluster 2	yes (cat. iii)	ZFTA-MAML2	RNA-seq. (FF)	RT-PCR	Ependymoma (WHO III)
DNA_FFPE	IlluminaHumanMethylation450k	EPN, RELA	0.802853	Cluster 3		ZFTA-RELA, NOS	DNA-panel seq.		Ependymoma (WHO III)
DNA_FFPE	IlluminaHumanMethylationEPIC	EPN, RELA	0.482292	Cluster 3		ZFTA-RELA, NOS	RNA-seq. (FFPE)		MPNST
DNA_FFPE	IlluminaHumanMethylation450k	EPN, RELA	0.353296	Cluster 3		ZFTA-RELA, NOS	DNA-panel seq.		Anaplastic ganglioglioma
DNA_KRYO	IlluminaHumanMethylation450k	EFT, CIC	0.109437	Cluster 3
DNA_FFPE	IlluminaHumanMethylation450k	EPN, RELA	0.0824613	Cluster 3		ZFTA-RELA	RNA-seq. (FFPE)		Former PNET
DNA_FFPE	IlluminaHumanMethylation450k	MNG	0.0711243	Cluster 3	yes (cat. ii)	ZFTA-RELA, NOS	RNA-seq. (FFPE)	DNA-panel seq.
DNA_FFPE	IlluminaHumanMethylation450k	MB, SHH CHL AD	0.0446814	Cluster 3		ZFTA-RELA, NOS	DNA-panel seq.		Former PNET
DNA_FFPE	IlluminaHumanMethylationEPIC	MNG	0.0789182	Cluster 3
DNA_FFPE	IlluminaHumanMethylationEPIC	EPN, RELA	0.0671363	Cluster 3	Yes (cat. ii)	ZFTA-RELA Type 2	RNA-seq. (FFPE)		Former PNET
DNA_FFPE	IlluminaHumanMethylationEPIC	MNG	0.0614612	Cluster 3		ZFTA-RELA, NOS	DNA-panel seq.
DNA_FFPE	IlluminaHumanMethylation450k	EPN, RELA	0.113348	Cluster 3		ZFTA-RELA, NOS	DNA-panel seq.		Astroblastoma
DNA_FFPE	IlluminaHumanMethylation450k	EPN, RELA	0.184563	Cluster 3
DNA_FFPE	IlluminaHumanMethylation450k	EPN, RELA	0.128261	Cluster 3		ZFTA-RELA Type 1	RNA-seq. (FFPE)	DNA-panel seq.	Chondrosarcoma
DNA_KRYO	IlluminaHumanMethylation450k	EPN, RELA	0.157294	Cluster 3
DNA_KRYO	IlluminaHumanMethylationEPIC	PLEX, PED B	0.0816133	Cluster 3	Yes (cat. ii)	ZFTA-RELA, NOS	RNA-seq. (FF)		Ependymoma (WHO III)
DNA_KRYO	IlluminaHumanMethylation450k	EPN, RELA	0.135046	Cluster 3	yes (cat. ii)	ZFTA-RELA, Type 3	RNA-seq. (FF)	RT-PCR	Ependymoma, NOS
DNA_KRYO	IlluminaHumanMethylationEPIC	MNG	0.0694881	Cluster 3	yes (cat. ii)	ZFTA-RELA, NOS	RNA-seq. (FF)		Embryonal tumor, NOS
DNA_FFPE	IlluminaHumanMethylation450k	EPN, RELA	0.266824	Cluster 4		ZFTA-CTNNA2	DNA-panel seq.		Undifferentiated sarcoma
DNA_FFPE	IlluminaHumanMethylationEPIC	EPN, RELA	0.812773	Cluster 4
DNA_FFPE	IlluminaHumanMethylationEPIC	EPN, RELA	0.333371	Cluster 4
DNA_FFPE	IlluminaHumanMethylationEPIC	PLEX, PED A	0.323157	Cluster 4		ZFTA-MAML3	RNA-seq. (FFPE)	DNA-panel seq. / RT-PCR	Former PNET
DNA_FFPE	IlluminaHumanMethylationEPIC	EPN, RELA	0.0654357	Cluster 4					Former PNET
DNA_KRYO	IlluminaHumanMethylationEPIC	EPN, RELA	0.472305	Cluster 4
DNA_FFPE	IlluminaHumanMethylationEPIC	EPN, RELA	0.148028	Cluster 4
DNA_FFPE	IlluminaHumanMethylationEPIC	ATRT, SHH	0.0862422	Cluster 4					Ependymoma (WHO II)
DNA_FFPE	IlluminaHumanMethylationEPIC	EPN, RELA	0.197108	Cluster 4		ZFTA-NCOA2	RNA-seq. (FFPE)
DNA_KRYO	IlluminaHumanMethylation450k	EPN, RELA	0.192983	Cluster 4
DNA_KRYO	IlluminaHumanMethylation450k	EPN, RELA	0.139952	Cluster 4
DNA_FFPE	IlluminaHumanMethylation450k	EPN, RELA	0.238295	Cluster 4		ZFTA-MAML2	RNA-seq. (FFPE)
DNA_FFPE	IlluminaHumanMethylation450k	EPN, RELA	0.128073	Cluster 4
DNA_FFPE	IlluminaHumanMethylation450k	PLEX, PED B	0.145087	Cluster 4		ZFTA-NCOA2	DNA-panel seq.		Former PNET
DNA_FFPE	IlluminaHumanMethylationEPIC	EPN, RELA	0.100076	Cluster 4
DNA_KRYO	IlluminaHumanMethylationEPIC	EPN, RELA	0.0698939	Cluster 4
DNA_FFPE	IlluminaHumanMethylationEPIC	PLEX, PED B	0.0671533	Cluster 4					Malignant epithelial undifferentrated tumor
DNA_FFPE	IlluminaHumanMethylationEPIC	PLEX, PED B	0.0686065	Cluster 4	yes (cat. iii)	no fusion detected	DNA-panel seq.		Ependymoma (WHO III)
DNA_FFPE	IlluminaHumanMethylationEPIC	EPN, RELA	0.128285	Cluster 4		ZFTA-NCOA2	DNA-panel seq.		Malignant small cell sarcomatoid tumor
DNA_FFPE	IlluminaHumanMethylationEPIC	EPN, RELA	0.0867434	Cluster 4					Former PNET
DNA_FFPE	IlluminaHumanMethylationEPIC	PLEX, PED B	0.109855	Cluster 4		ZFTA-MAML3	DNA-panel seq.		Embryonal tumor, NOS
DNA_FFPE	IlluminaHumanMethylation450k	PLEX, PED B	0.167896	Cluster 4		ZFTA-MAML2	DNA-panel seq.		Malignant teratoma
DNA_FFPE	IlluminaHumanMethylation450k	EPN, RELA	0.10443	Cluster 4					Former PNET
DNA_KRYO	IlluminaHumanMethylation450k	PITAD, TSH	0.0453397	Cluster 4
DNA_FFPE	IlluminaHumanMethylation450k	EPN, RELA	0.0637599	Cluster 4					Highgrade Glioma, NOS
DNA_KRYO	IlluminaHumanMethylation450k	PLEX, PED B	0.0910341	Cluster 4
DNA_KRYO	IlluminaHumanMethylationEPIC	EPN, RELA	0.255786	Cluster 4		ZFTA-NCOA2	RNA-seq. (FF)
DNA_KRYO	IlluminaHumanMethylation450k	LGG, MYB	0.177	excluded (not clustering with ST-EPN-RELA / satellite clusters)	yes (cat. iii)				Ependymoma, NOS
DNA_FFPE	IlluminaHumanMethylation450k	EPN, RELA	0.14	excluded (not clustering with ST-EPN-RELA / satellite clusters)	yes (cat. iii)				Ependymoma, NOS
DNA_FFPE	IlluminaHumanMethylation450k	EPN, RELA	0.095	excluded (not clustering with ST-EPN-RELA / satellite clusters)	yes (cat. iii)				Ependymoma, NOS
DNA_FFPE	IlluminaHumanMethylation450k	EPN, RELA	0.998296	Outlier					Ependymoma, NOS
DNA_FFPE	IlluminaHumanMethylation450k	EPN, RELA	0.999705	Outlier					Ependymoma, NOS
DNA_KRYO	IlluminaHumanMethylation450k	EPN, RELA	0.921048	Outlier					Ependymoma, NOS
DNA_FFPE	IlluminaHumanMethylationEPIC	EPN, RELA	0.332898	Outlier
DNA_FFPE	IlluminaHumanMethylationEPIC	EPN, RELA	0.938951	Outlier
DNA_FFPE	IlluminaHumanMethylationEPIC	EPN, RELA	0.96006	Outlier
DNA_FFPE	IlluminaHumanMethylationEPIC	EPN, RELA	0.367956	Outlier					Former PNET
DNA_FFPE	IlluminaHumanMethylationEPIC	EPN, RELA	0.449558	Outlier					Glioblastoma (WHO IV)
DNA_FFPE	IlluminaHumanMethylationEPIC	EPN, RELA	0.731584	Outlier					Ependymoma, NOS
DNA_FFPE	IlluminaHumanMethylationEPIC	EPN, RELA	0.729599	Outlier
DNA_FFPE	IlluminaHumanMethylationEPIC	EPN, RELA	0.654598	Outlier	yes (cat. iii)	ZFTA-NCOA2	RNA-seq. (FFPE)		Ependymoma (WHO III)
DNA_FFPE	IlluminaHumanMethylationEPIC	EPN, RELA	0.999806	Outlier		ZFTA-RELA Type 2	RNA-seq. (FFPE)		Ependymoma (WHO III)
DNA_FFPE	IlluminaHumanMethylation450k	EPN, RELA	0.999864	Outlier					Ependymoma (WHO II)
DNA_KRYO	IlluminaHumanMethylation450k	EPN, RELA	0.990129	Outlier					Former PNET
DNA_FFPE	IlluminaHumanMethylation450k	EPN, RELA	0.999501	Outlier					Ependymoma, NOS
DNA_FFPE	IlluminaHumanMethylation450k	EPN, RELA	0.999981	Outlier					Ependymoma, NOS
DNA_FFPE	IlluminaHumanMethylation450k	EPN, RELA	0.995194	Outlier					Ependymoma, NOS
DNA_FFPE	IlluminaHumanMethylation450k	EPN, RELA	0.999996	Outlier					Ependymoma (WHO III)
DNA_FFPE	IlluminaHumanMethylation450k	EPN, RELA	0.999874	Outlier					Ependymoma (WHO III)
DNA_FFPE	IlluminaHumanMethylation450k	EPN, RELA	0.999978	Outlier					Ependymoma (WHO III)
DNA_KRYO	IlluminaHumanMethylation450k	EPN, RELA	0.273695	Outlier
DNA_KRYO	IlluminaHumanMethylation450k	EPN, RELA	0.994432	Outlier					Ependymoma (WHO II)
DNA_FFPE	IlluminaHumanMethylationEPIC	EPN, RELA	0.188902	Outlier
DNA_FFPE	IlluminaHumanMethylation450k	GBM, MYCN	0.523868	Outlier
DNA_FFPE	IlluminaHumanMethylation450k	MNG	0.0826211	Outlier					Anaplastic oligodendroglioma
DNA_KRYO	IlluminaHumanMethylation450k	EPN, RELA	0.999668	ST-EPN-RELA
DNA_KRYO	IlluminaHumanMethylation450k	EPN, RELA	0.999509	ST-EPN-RELA
DNA_KRYO	IlluminaHumanMethylation450k	EPN, RELA	0.999951	ST-EPN-RELA
DNA_FFPE	IlluminaHumanMethylation450k	EPN, RELA	0.999591	ST-EPN-RELA					Glioblastom (WHO IV)
DNA_KRYO	IlluminaHumanMethylation450k	EPN, RELA	0.999902	ST-EPN-RELA
DNA_KRYO	IlluminaHumanMethylation450k	EPN, RELA	0.999482	ST-EPN-RELA
DNA_FFPE	IlluminaHumanMethylation450k	EPN, RELA	0.999868	ST-EPN-RELA
DNA_FFPE	IlluminaHumanMethylation450k	EPN, RELA	0.997596	ST-EPN-RELA
DNA_FFPE	IlluminaHumanMethylation450k	EPN, RELA	0.999705	ST-EPN-RELA
DNA_FFPE	IlluminaHumanMethylation450k	EPN, RELA	0.998763	ST-EPN-RELA
DNA_FFPE	IlluminaHumanMethylation450k	EPN, RELA	0.971223	ST-EPN-RELA
DNA_FFPE	IlluminaHumanMethylation450k	EPN, RELA	0.999981	ST-EPN-RELA
DNA_FFPE	IlluminaHumanMethylation450k	EPN, RELA	0.991864	ST-EPN-RELA
DNA_KRYO	IlluminaHumanMethylation450k	EPN, RELA	0.997382	ST-EPN-RELA		ZFTA-RELA, NOS	RNA-seq. (FFPE)		Ependymoma, NOS
DNA_KRYO	IlluminaHumanMethylation450k	EPN, RELA	0.9962	ST-EPN-RELA					Ependymoma, NOS
DNA_FFPE	IlluminaHumanMethylation450k	EPN, RELA	0.999255	ST-EPN-RELA
DNA_FFPE	IlluminaHumanMethylation450k	EPN, RELA	0.999954	ST-EPN-RELA
DNA_FFPE	IlluminaHumanMethylation450k	EPN, RELA	0.928961	ST-EPN-RELA
DNA_KRYO	IlluminaHumanMethylation450k	EPN, RELA	0.896974	ST-EPN-RELA
DNA_FFPE	IlluminaHumanMethylation450k	EPN, RELA	0.999972	ST-EPN-RELA
DNA_FFPE	IlluminaHumanMethylation450k	EPN, RELA	0.99995	ST-EPN-RELA
DNA_FFPE	IlluminaHumanMethylation450k	EPN, RELA	0.999949	ST-EPN-RELA
DNA_FFPE	IlluminaHumanMethylation450k	EPN, RELA	0.9991	ST-EPN-RELA
DNA_FFPE	IlluminaHumanMethylation450k	EPN, RELA	0.998715	ST-EPN-RELA
DNA_FFPE	IlluminaHumanMethylation450k	EPN, RELA	0.998443	ST-EPN-RELA
DNA_FFPE	IlluminaHumanMethylation450k	EPN, RELA	0.999268	ST-EPN-RELA
DNA_FFPE	IlluminaHumanMethylation450k	EPN, RELA	0.999977	ST-EPN-RELA
DNA_KRYO	IlluminaHumanMethylation450k	EPN, RELA	0.991951	ST-EPN-RELA
DNA_FFPE	IlluminaHumanMethylation450k	EPN, RELA	0.999989	ST-EPN-RELA					Ependymoma (WHO II)
DNA_FFPE	IlluminaHumanMethylation450k	EPN, RELA	0.99939	ST-EPN-RELA					Ependymoma (WHO III)
DNA_FFPE	IlluminaHumanMethylation450k	EPN, RELA	0.999439	ST-EPN-RELA					Ependymoma (WHO III)
DNA_FFPE	IlluminaHumanMethylation450k	EPN, RELA	0.997315	ST-EPN-RELA					Ependymoma, NOS
DNA_FFPE	IlluminaHumanMethylation450k	EPN, RELA	0.999963	ST-EPN-RELA					Ependymoma, NOS
DNA_FFPE	IlluminaHumanMethylation450k	EPN, RELA	0.999994	ST-EPN-RELA					Ependymoma, NOS
DNA_FFPE	IlluminaHumanMethylation450k	EPN, RELA	0.999966	ST-EPN-RELA					Ependymoma, NOS
DNA_FFPE	IlluminaHumanMethylation450k	EPN, RELA	0.999922	ST-EPN-RELA					Ependymoma, NOS
DNA_FFPE	IlluminaHumanMethylation450k	EPN, RELA	0.999946	ST-EPN-RELA					Ependymoma, NOS
DNA_FFPE	IlluminaHumanMethylation450k	EPN, RELA	0.999933	ST-EPN-RELA					Ependymoma, NOS
DNA_FFPE	IlluminaHumanMethylation450k	EPN, RELA	0.999867	ST-EPN-RELA					Ependymoma, NOS
DNA_FFPE	IlluminaHumanMethylation450k	EPN, RELA	0.999977	ST-EPN-RELA					Ependymoma, NOS
DNA_FFPE	IlluminaHumanMethylation450k	EPN, RELA	0.999994	ST-EPN-RELA					Ependymoma, NOS
DNA_FFPE	IlluminaHumanMethylation450k	EPN, RELA	0.994687	ST-EPN-RELA					Ependymoma, NOS
DNA_FFPE	IlluminaHumanMethylation450k	EPN, RELA	0.979009	ST-EPN-RELA					Ependymoma (WHO III)
DNA_FFPE	IlluminaHumanMethylation450k	EPN, RELA	0.999991	ST-EPN-RELA					Ependymoma, NOS
DNA_FFPE	IlluminaHumanMethylation450k	EPN, RELA	0.999474	ST-EPN-RELA					Ependymoma, NOS
DNA_FFPE	IlluminaHumanMethylation450k	EPN, RELA	0.999967	ST-EPN-RELA					Ependymoma, NOS
DNA_FFPE	IlluminaHumanMethylation450k	EPN, RELA	0.999971	ST-EPN-RELA					Ependymoma, NOS
DNA_FFPE	IlluminaHumanMethylation450k	EPN, RELA	0.999677	ST-EPN-RELA					Ependymoma, NOS
DNA_KRYO	IlluminaHumanMethylation450k	EPN, RELA	0.917479	ST-EPN-RELA					Ependymoma, NOS
DNA_FFPE	IlluminaHumanMethylation450k	EPN, RELA	0.999636	ST-EPN-RELA					Ependymoma, NOS
DNA_FFPE	IlluminaHumanMethylation450k	EPN, RELA	0.996111	ST-EPN-RELA					Ependymoma, NOS
DNA_FFPE	IlluminaHumanMethylation450k	EPN, RELA	0.986919	ST-EPN-RELA					Astroblastoma
DNA_FFPE	IlluminaHumanMethylation450k	EPN, RELA	0.815053	ST-EPN-RELA					Glioblastoma (WHO IV)
DNA_FFPE	IlluminaHumanMethylation450k	EPN, RELA	0.999891	ST-EPN-RELA
DNA_KRYO	IlluminaHumanMethylation450k	EPN, RELA	0.955546	ST-EPN-RELA
DNA_FFPE	IlluminaHumanMethylation450k	EPN, RELA	0.998441	ST-EPN-RELA
DNA_FFPE	IlluminaHumanMethylation450k	EPN, RELA	0.991317	ST-EPN-RELA
DNA_FFPE	IlluminaHumanMethylation450k	EPN, RELA	0.999676	ST-EPN-RELA
DNA_FFPE	IlluminaHumanMethylation450k	EPN, RELA	0.998848	ST-EPN-RELA					Former PNET
DNA_KRYO	IlluminaHumanMethylation450k	EPN, RELA	0.631311	ST-EPN-RELA
DNA_FFPE	IlluminaHumanMethylation450k	EPN, RELA	0.999388	ST-EPN-RELA					Ependymoma (WHO II)
DNA_FFPE	IlluminaHumanMethylation450k	EPN, RELA	0.990496	ST-EPN-RELA					Ependymoma (WHO III)
DNA_FFPE	IlluminaHumanMethylation450k	EPN, RELA	0.997451	ST-EPN-RELA					Ependymoma (WHO III)
DNA_FFPE	IlluminaHumanMethylation450k	EPN, RELA	0.94188	ST-EPN-RELA					Ependymoma (WHO III)
DNA_FFPE	IlluminaHumanMethylation450k	EPN, RELA	0.999652	ST-EPN-RELA					Ependymoma, NOS
DNA_FFPE	IlluminaHumanMethylation450k	EPN, RELA	0.999986	ST-EPN-RELA					Ependymoma, NOS
DNA_FFPE	IlluminaHumanMethylation450k	EPN, RELA	0.88414	ST-EPN-RELA					Ependymoma (WHO III)
DNA_KRYO	IlluminaHumanMethylation450k	EPN, RELA	0.998223	ST-EPN-RELA		ZFTA-RELA, NOS	RNA-seq. (FFPE)		Ependymoma, NOS
DNA_FFPE	IlluminaHumanMethylation450k	EPN, RELA	0.999646	ST-EPN-RELA					Ependymoma, NOS
DNA_FFPE	IlluminaHumanMethylation450k	EPN, RELA	0.999747	ST-EPN-RELA					Ependymoma, NOS
DNA_FFPE	IlluminaHumanMethylation450k	EPN, RELA	0.999986	ST-EPN-RELA					Ependymoma, NOS
DNA_FFPE	IlluminaHumanMethylation450k	EPN, RELA	0.999713	ST-EPN-RELA					Ependymoma, NOS
DNA_FFPE	IlluminaHumanMethylation450k	EPN, RELA	0.999994	ST-EPN-RELA					Ependymoma, NOS
DNA_FFPE	IlluminaHumanMethylation450k	EPN, RELA	0.999854	ST-EPN-RELA					Ependymoma, NOS
DNA_FFPE	IlluminaHumanMethylation450k	EPN, RELA	0.999013	ST-EPN-RELA					Ependymoma, NOS
DNA_FFPE	IlluminaHumanMethylation450k	EPN, RELA	0.95663	ST-EPN-RELA					Ependymoma, NOS
DNA_FFPE	IlluminaHumanMethylation450k	EPN, RELA	0.991236	ST-EPN-RELA					Former PNET
DNA_FFPE	IlluminaHumanMethylation450k	EPN, RELA	0.949007	ST-EPN-RELA					Ependymoma (WHO III)
DNA_FFPE	IlluminaHumanMethylation450k	EPN, RELA	0.99883	ST-EPN-RELA					Ependymoma, NOS
DNA_FFPE	IlluminaHumanMethylation450k	EPN, RELA	0.999609	ST-EPN-RELA					Ependymoma, NOS
DNA_FFPE	IlluminaHumanMethylation450k	EPN, RELA	0.999876	ST-EPN-RELA					Former PNET
DNA_FFPE	IlluminaHumanMethylation450k	EPN, RELA	0.999934	ST-EPN-RELA					Former PNET
DNA_FFPE	IlluminaHumanMethylation450k	EPN, RELA	0.96164	ST-EPN-RELA					Former PNET
DNA_FFPE	IlluminaHumanMethylation450k	EPN, RELA	0.999244	ST-EPN-RELA					Former PNET
DNA_FFPE	IlluminaHumanMethylation450k	EPN, RELA	0.998776	ST-EPN-RELA					Former PNET
DNA_FFPE	IlluminaHumanMethylation450k	EPN, RELA	0.999291	ST-EPN-RELA					Former PNET
DNA_FFPE	IlluminaHumanMethylation450k	EPN, RELA	0.997111	ST-EPN-RELA					Former PNET
DNA_FFPE	IlluminaHumanMethylationEPIC	EPN, RELA	0.988223	ST-EPN-RELA					Former PNET
DNA_FFPE	IlluminaHumanMethylation450k	EPN, RELA	0.999992	ST-EPN-RELA					Ependymoma (WHO III)
DNA_FFPE	IlluminaHumanMethylationEPIC	EPN, RELA	0.999894	ST-EPN-RELA
DNA_FFPE	IlluminaHumanMethylationEPIC	EPN, RELA	0.218716	ST-EPN-RELA		ZFTA-RELA Type 2	RNA-seq. (FFPE)		Former PNET
DNA_FFPE	IlluminaHumanMethylationEPIC	EPN, RELA	0.999908	ST-EPN-RELA
DNA_FFPE	IlluminaHumanMethylation450k	EPN, RELA	0.99972	ST-EPN-RELA
DNA_FFPE	IlluminaHumanMethylation450k	EPN, RELA	0.996776	ST-EPN-RELA
DNA_FFPE	IlluminaHumanMethylation450k	EPN, RELA	0.997134	ST-EPN-RELA
DNA_FFPE	IlluminaHumanMethylation450k	EPN, RELA	0.996478	ST-EPN-RELA
DNA_FFPE	IlluminaHumanMethylation450k	EPN, RELA	0.999849	ST-EPN-RELA
DNA_FFPE	IlluminaHumanMethylation450k	EPN, RELA	0.99987	ST-EPN-RELA
DNA_FFPE	IlluminaHumanMethylationEPIC	EPN, RELA	0.991763	ST-EPN-RELA
DNA_KRYO	IlluminaHumanMethylationEPIC	EPN, RELA	0.999956	ST-EPN-RELA
DNA_KRYO	IlluminaHumanMethylationEPIC	EPN, RELA	0.99998	ST-EPN-RELA					Ependymoma, NOS
DNA_FFPE	IlluminaHumanMethylationEPIC	EPN, RELA	0.992423	ST-EPN-RELA
DNA_FFPE	IlluminaHumanMethylationEPIC	EPN, RELA	0.999849	ST-EPN-RELA					Ependymoma (WHO III)
DNA_KRYO	IlluminaHumanMethylationEPIC	EPN, RELA	0.999381	ST-EPN-RELA					Ependymoma, NOS
DNA_FFPE	IlluminaHumanMethylationEPIC	EPN, RELA	0.997429	ST-EPN-RELA					Former PNET
DNA_KRYO	IlluminaHumanMethylationEPIC	EPN, RELA	0.998496	ST-EPN-RELA					Ependymoma, NOS
DNA_KRYO	IlluminaHumanMethylationEPIC	EPN, RELA	0.988113	ST-EPN-RELA					Ependymoma, NOS
DNA_FFPE	IlluminaHumanMethylationEPIC	EPN, RELA	0.98639	ST-EPN-RELA					Ependymoma (WHO II)
DNA_FFPE	IlluminaHumanMethylationEPIC	EPN, RELA	0.996403	ST-EPN-RELA					Glioma, NOS
DNA_FFPE	IlluminaHumanMethylation450k	EPN, RELA	0.380066	ST-EPN-RELA
DNA_FFPE	IlluminaHumanMethylation450k	EPN, RELA	0.996654	ST-EPN-RELA
DNA_FFPE	IlluminaHumanMethylationEPIC	EPN, RELA	0.997735	ST-EPN-RELA
DNA_KRYO	IlluminaHumanMethylationEPIC	EPN, RELA	0.999948	ST-EPN-RELA					Ependymoma, NOS
DNA_KRYO	IlluminaHumanMethylationEPIC	EPN, RELA	0.997079	ST-EPN-RELA					Ependymoma, NOS
DNA_KRYO	IlluminaHumanMethylationEPIC	EPN, RELA	0.999745	ST-EPN-RELA					Ependymoma, NOS
DNA_KRYO	IlluminaHumanMethylationEPIC	EPN, RELA	0.999669	ST-EPN-RELA					Ependymoma, NOS
DNA_KRYO	IlluminaHumanMethylationEPIC	EPN, RELA	0.999834	ST-EPN-RELA					Ependymoma, NOS
DNA_FFPE	IlluminaHumanMethylationEPIC	EPN, RELA	0.993103	ST-EPN-RELA					Ependymoma (WHO III)
DNA_KRYO	IlluminaHumanMethylationEPIC	EPN, RELA	0.999962	ST-EPN-RELA
DNA_KRYO	IlluminaHumanMethylationEPIC	EPN, RELA	0.995778	ST-EPN-RELA					Ependymoma, NOS
DNA_KRYO	IlluminaHumanMethylationEPIC	EPN, RELA	0.986947	ST-EPN-RELA					Ependymoma, NOS
DNA_KRYO	IlluminaHumanMethylationEPIC	EPN, RELA	0.999974	ST-EPN-RELA					Ependymoma, NOS
DNA_FFPE	IlluminaHumanMethylationEPIC	EPN, RELA	0.995243	ST-EPN-RELA					Ependymoma, NOS
DNA_FFPE	IlluminaHumanMethylationEPIC	EPN, RELA	0.894303	ST-EPN-RELA		ZFTA-RELA Type 8	RNA-seq. (FFPE)		Ependymoma (WHO III)
DNA_KRYO	IlluminaHumanMethylationEPIC	EPN, RELA	0.999634	ST-EPN-RELA					Ependymoma, NOS
DNA_KRYO	IlluminaHumanMethylationEPIC	EPN, RELA	0.99921	ST-EPN-RELA					Ependymoma, NOS
DNA_FFPE	IlluminaHumanMethylationEPIC	EPN, RELA	0.92046	ST-EPN-RELA					Cerebellar liponeurocytoma
DNA_FFPE	IlluminaHumanMethylationEPIC	EPN, RELA	0.998476	ST-EPN-RELA					Ependymoma, NOS
DNA_FFPE	IlluminaHumanMethylationEPIC	EPN, RELA	0.99979	ST-EPN-RELA					Former PNET
DNA_FFPE	IlluminaHumanMethylationEPIC	EPN, RELA	0.999702	ST-EPN-RELA					Ependymoma, NOS
DNA_FFPE	IlluminaHumanMethylationEPIC	EPN, RELA	0.999902	ST-EPN-RELA					Ependymoma, NOS
DNA_FFPE	IlluminaHumanMethylationEPIC	EPN, RELA	0.998548	ST-EPN-RELA					Ependymoma, NOS
DNA_FFPE	IlluminaHumanMethylationEPIC	EPN, RELA	0.989761	ST-EPN-RELA					Ependymoma, NOS
DNA_FFPE	IlluminaHumanMethylationEPIC	EPN, RELA	0.999871	ST-EPN-RELA					Ependymoma, NOS
DNA_FFPE	IlluminaHumanMethylationEPIC	EPN, RELA	0.998611	ST-EPN-RELA					Ependymoma, NOS
DNA_KRYO	IlluminaHumanMethylationEPIC	EPN, RELA	0.999934	ST-EPN-RELA
DNA_KRYO	IlluminaHumanMethylationEPIC	EPN, RELA	0.999479	ST-EPN-RELA
DNA_KRYO	IlluminaHumanMethylationEPIC	EPN, RELA	0.992934	ST-EPN-RELA
DNA_FFPE	IlluminaHumanMethylationEPIC	EPN, RELA	0.994671	ST-EPN-RELA					Ependymoma (WHO III)
DNA_FFPE	IlluminaHumanMethylationEPIC	EPN, RELA	0.999568	ST-EPN-RELA					Ependymoma (WHO III)
DNA_FFPE	IlluminaHumanMethylationEPIC	EPN, RELA	0.997675	ST-EPN-RELA					Ependymoma, NOS
DNA_FFPE	IlluminaHumanMethylationEPIC	EPN, RELA	0.997465	ST-EPN-RELA					Ependymoma (WHO III)
DNA_FFPE	IlluminaHumanMethylationEPIC	EPN, RELA	0.893281	ST-EPN-RELA					Neuroepithelial tumor with expression of neuronal markers
DNA_FFPE	IlluminaHumanMethylationEPIC	EPN, RELA	0.993682	ST-EPN-RELA					Ependymoma (WHO III)
DNA_FFPE	IlluminaHumanMethylationEPIC	EPN, RELA	0.99162	ST-EPN-RELA
DNA_FFPE	IlluminaHumanMethylationEPIC	EPN, RELA	0.999858	ST-EPN-RELA					Ependymoma, NOS
DNA_FFPE	IlluminaHumanMethylationEPIC	EPN, RELA	0.999559	ST-EPN-RELA					Ependymoma, NOS
DNA_KRYO	IlluminaHumanMethylationEPIC	EPN, RELA	0.263003	ST-EPN-RELA					Ependymoma (WHO III)
DNA_KRYO	IlluminaHumanMethylationEPIC	EPN, RELA	0.98281	ST-EPN-RELA					Ependymoma, NOS
DNA_FFPE	IlluminaHumanMethylationEPIC	EPN, RELA	0.99967	ST-EPN-RELA					Former PNET
DNA_FFPE	IlluminaHumanMethylationEPIC	EPN, RELA	0.999985	ST-EPN-RELA					Former PNET
DNA_FFPE	IlluminaHumanMethylationEPIC	EPN, RELA	0.975606	ST-EPN-RELA					Former PNET
DNA_FFPE	IlluminaHumanMethylationEPIC	EPN, RELA	0.999809	ST-EPN-RELA					Ependymoma (WHO III)
DNA_KRYO	IlluminaHumanMethylationEPIC	EPN, RELA	0.990219	ST-EPN-RELA		ZFTA-RELA, NOS	RNA-seq. (FF)		Ependymoma (WHO III)
DNA_KRYO	IlluminaHumanMethylationEPIC	EPN, RELA	0.962746	ST-EPN-RELA		ZFTA-RELA, NOS	RNA-seq. (FF)		Ependymoma (WHO III)
DNA_KRYO	IlluminaHumanMethylationEPIC	EPN, RELA	0.955931	ST-EPN-RELA					Ependymoma, NOS
DNA_FFPE	IlluminaHumanMethylationEPIC	EPN, RELA	0.999993	ST-EPN-RELA					Ependymoma, NOS
DNA_FFPE	IlluminaHumanMethylationEPIC	EPN, RELA	0.999688	ST-EPN-RELA					Ependymoma, NOS
DNA_FFPE	IlluminaHumanMethylationEPIC	EPN, RELA	0.999697	ST-EPN-RELA					Ependymoma, NOS
DNA_FFPE	IlluminaHumanMethylationEPIC	EPN, RELA	0.999939	ST-EPN-RELA					Ependymoma, NOS
DNA_FFPE	IlluminaHumanMethylationEPIC	EPN, RELA	0.998129	ST-EPN-RELA					Ependymoma, NOS
DNA_FFPE	IlluminaHumanMethylationEPIC	EPN, RELA	0.994743	ST-EPN-RELA					Ependymoma, NOS
DNA_FFPE	IlluminaHumanMethylationEPIC	EPN, RELA	0.999527	ST-EPN-RELA					Ependymoma, NOS
DNA_FFPE	IlluminaHumanMethylationEPIC	EPN, RELA	0.996373	ST-EPN-RELA					Ependymoma, NOS
DNA_FFPE	IlluminaHumanMethylationEPIC	EPN, RELA	0.999918	ST-EPN-RELA					Ependymoma, NOS
DNA_FFPE	IlluminaHumanMethylationEPIC	EPN, RELA	0.999969	ST-EPN-RELA					Ependymoma, NOS
DNA_FFPE	IlluminaHumanMethylationEPIC	EPN, RELA	0.999842	ST-EPN-RELA					Ependymoma, NOS
DNA_FFPE	IlluminaHumanMethylationEPIC	EPN, RELA	0.999805	ST-EPN-RELA					Ependymoma, NOS
DNA_FFPE	IlluminaHumanMethylationEPIC	EPN, RELA	0.999756	ST-EPN-RELA					Ependymoma, NOS
DNA_FFPE	IlluminaHumanMethylationEPIC	EPN, RELA	0.999535	ST-EPN-RELA					Ependymoma, NOS
DNA_FFPE	IlluminaHumanMethylationEPIC	EPN, RELA	0.999114	ST-EPN-RELA					Ependymoma, NOS
DNA_FFPE	IlluminaHumanMethylationEPIC	EPN, RELA	0.999939	ST-EPN-RELA					Ependymoma, NOS
DNA_FFPE	IlluminaHumanMethylationEPIC	EPN, RELA	0.999951	ST-EPN-RELA					Ependymoma, NOS
DNA_FFPE	IlluminaHumanMethylationEPIC	EPN, RELA	0.990241	ST-EPN-RELA					Ependymoma, NOS
DNA_FFPE	IlluminaHumanMethylationEPIC	EPN, RELA	0.999091	ST-EPN-RELA					Ependymoma, NOS
DNA_FFPE	IlluminaHumanMethylationEPIC	EPN, RELA	0.999739	ST-EPN-RELA					Ependymoma, NOS
DNA_FFPE	IlluminaHumanMethylationEPIC	EPN, RELA	0.99984	ST-EPN-RELA					Ependymoma, NOS
DNA_FFPE	IlluminaHumanMethylationEPIC	EPN, RELA	0.999891	ST-EPN-RELA					Ependymoma, NOS
DNA_FFPE	IlluminaHumanMethylationEPIC	EPN, RELA	0.999938	ST-EPN-RELA
DNA_FFPE	IlluminaHumanMethylationEPIC	EPN, RELA	0.979472	ST-EPN-RELA
DNA_FFPE	IlluminaHumanMethylationEPIC	EPN, RELA	0.967567	ST-EPN-RELA
DNA_FFPE	IlluminaHumanMethylationEPIC	EPN, RELA	0.245097	ST-EPN-RELA
DNA_FFPE	IlluminaHumanMethylationEPIC	EPN, RELA	0.988306	ST-EPN-RELA
DNA_KRYO	IlluminaHumanMethylationEPIC	EPN, RELA	0.99481	ST-EPN-RELA
DNA_FFPE	IlluminaHumanMethylationEPIC	EPN, RELA	0.999194	ST-EPN-RELA
DNA_FFPE	IlluminaHumanMethylationEPIC	EPN, RELA	0.970103	ST-EPN-RELA
DNA_FFPE	IlluminaHumanMethylationEPIC	EPN, RELA	0.999967	ST-EPN-RELA					Malignant glial tumor
DNA_FFPE	IlluminaHumanMethylationEPIC	EPN, RELA	0.999526	ST-EPN-RELA					Ependymoma, NOS
DNA_FFPE	IlluminaHumanMethylationEPIC	EPN, RELA	0.993247	ST-EPN-RELA					Ependymoma, NOS
DNA_FFPE	IlluminaHumanMethylationEPIC	EPN, RELA	0.582396	ST-EPN-RELA					Ependymoma, NOS
DNA_FFPE	IlluminaHumanMethylationEPIC	EPN, RELA	0.999854	ST-EPN-RELA					Ependymoma, NOS
DNA_FFPE	IlluminaHumanMethylationEPIC	EPN, RELA	0.970507	ST-EPN-RELA					Ependymoma (WHO III)
DNA_FFPE	IlluminaHumanMethylationEPIC	EPN, RELA	0.993215	ST-EPN-RELA					Ependymoma, NOS
DNA_FFPE	IlluminaHumanMethylationEPIC	EPN, RELA	0.998458	ST-EPN-RELA					Glioblastoma (WHO IV)
DNA_FFPE	IlluminaHumanMethylationEPIC	EPN, RELA	0.999713	ST-EPN-RELA
DNA_FFPE	IlluminaHumanMethylationEPIC	EPN, RELA	0.947717	ST-EPN-RELA					Ependymoma (WHO III)
DNA_FFPE	IlluminaHumanMethylationEPIC	EPN, RELA	0.997159	ST-EPN-RELA					Ependymoma (WHO III)
DNA_KRYO	IlluminaHumanMethylationEPIC	EPN, RELA	0.997881	ST-EPN-RELA
DNA_FFPE	IlluminaHumanMethylationEPIC	EPN, RELA	0.809435	ST-EPN-RELA
DNA_FFPE	IlluminaHumanMethylationEPIC	EPN, RELA	0.412362	ST-EPN-RELA					Ependymoma, NOS
DNA_FFPE	IlluminaHumanMethylationEPIC	EPN, RELA	0.997371	ST-EPN-RELA					Ependymoma, NOS
DNA_FFPE	IlluminaHumanMethylationEPIC	EPN, RELA	0.996026	ST-EPN-RELA					Ependymoma, NOS
DNA_FFPE	IlluminaHumanMethylationEPIC	EPN, RELA	0.999973	ST-EPN-RELA					Ependymoma, NOS
DNA_FFPE	IlluminaHumanMethylationEPIC	EPN, RELA	0.999819	ST-EPN-RELA					Ependymoma, NOS
DNA_FFPE	IlluminaHumanMethylationEPIC	EPN, RELA	0.999486	ST-EPN-RELA					Ependymoma, NOS
DNA_FFPE	IlluminaHumanMethylationEPIC	EPN, RELA	0.999943	ST-EPN-RELA					Ependymoma, NOS
DNA_FFPE	IlluminaHumanMethylationEPIC	EPN, RELA	0.999886	ST-EPN-RELA					Ependymoma, NOS
DNA_FFPE	IlluminaHumanMethylationEPIC	EPN, RELA	0.918953	ST-EPN-RELA					Ependymoma, NOS
DNA_FFPE	IlluminaHumanMethylationEPIC	EPN, RELA	0.999837	ST-EPN-RELA					Ependymoma, NOS
DNA_FFPE	IlluminaHumanMethylationEPIC	EPN, RELA	0.629345	ST-EPN-RELA					Ependymoma, NOS
DNA_FFPE	IlluminaHumanMethylationEPIC	EPN, RELA	0.962858	ST-EPN-RELA					Ependymoma, NOS
DNA_FFPE	IlluminaHumanMethylationEPIC	EPN, RELA	0.999992	ST-EPN-RELA					Ependymoma, NOS
DNA_FFPE	IlluminaHumanMethylationEPIC	EPN, RELA	0.989535	ST-EPN-RELA
DNA_KRYO	IlluminaHumanMethylationEPIC	EPN, RELA	0.999676	ST-EPN-RELA
DNA_KRYO	IlluminaHumanMethylationEPIC	EPN, RELA	0.999735	ST-EPN-RELA
DNA_KRYO	IlluminaHumanMethylationEPIC	EPN, RELA	0.999938	ST-EPN-RELA
DNA_KRYO	IlluminaHumanMethylationEPIC	EPN, RELA	0.999558	ST-EPN-RELA
DNA_KRYO	IlluminaHumanMethylationEPIC	EPN, RELA	0.999988	ST-EPN-RELA
DNA_KRYO	IlluminaHumanMethylationEPIC	EPN, RELA	0.999786	ST-EPN-RELA
DNA_FFPE	IlluminaHumanMethylationEPIC	EPN, RELA	0.999862	ST-EPN-RELA
DNA_KRYO	IlluminaHumanMethylationEPIC	EPN, RELA	0.999342	ST-EPN-RELA
DNA_KRYO	IlluminaHumanMethylationEPIC	EPN, RELA	0.999921	ST-EPN-RELA
DNA_FFPE	IlluminaHumanMethylationEPIC	EPN, RELA	0.269711	ST-EPN-RELA
DNA_FFPE	IlluminaHumanMethylationEPIC	EPN, RELA	0.999032	ST-EPN-RELA					Ependymoma, NOS
DNA_FFPE	IlluminaHumanMethylationEPIC	EPN, RELA	0.87407	ST-EPN-RELA					Ependymoma, NOS
DNA_FFPE	IlluminaHumanMethylationEPIC	EPN, RELA	0.999982	ST-EPN-RELA					Ependymoma (WHO III)
DNA_FFPE	IlluminaHumanMethylationEPIC	EPN, RELA	0.998661	ST-EPN-RELA					Neuroepithelial tumor, NOS
DNA_FFPE	IlluminaHumanMethylationEPIC	EPN, RELA	0.986269	ST-EPN-RELA
DNA_FFPE	IlluminaHumanMethylationEPIC	EPN, RELA	0.954148	ST-EPN-RELA
DNA_FFPE	IlluminaHumanMethylationEPIC	EPN, RELA	0.883331	ST-EPN-RELA					Ependymoma (WHO II)
DNA_FFPE	IlluminaHumanMethylationEPIC	EPN, RELA	0.783414	ST-EPN-RELA
DNA_FFPE	IlluminaHumanMethylationEPIC	EPN, RELA	0.16731	ST-EPN-RELA					Ependymoma (WHO III)
DNA_FFPE	IlluminaHumanMethylationEPIC	EPN, RELA	0.996632	ST-EPN-RELA					Cystic mass, NOS
DNA_FFPE	IlluminaHumanMethylationEPIC	EPN, RELA	0.997316	ST-EPN-RELA					Former PNET
DNA_FFPE	IlluminaHumanMethylationEPIC	EPN, RELA	0.999837	ST-EPN-RELA					Ependymoma (WHO III)
DNA_FFPE	IlluminaHumanMethylationEPIC	EPN, RELA	0.996224	ST-EPN-RELA					Ependymoma (WHO III)
DNA_FFPE	IlluminaHumanMethylationEPIC	EPN, RELA	0.983746	ST-EPN-RELA					Ependymoma, NOS
DNA_FFPE	IlluminaHumanMethylationEPIC	EPN, RELA	0.997777	ST-EPN-RELA
DNA_FFPE	IlluminaHumanMethylationEPIC	EPN, RELA	0.997679	ST-EPN-RELA					Ependymoma, NOS
DNA_FFPE	IlluminaHumanMethylationEPIC	EPN, RELA	0.999919	ST-EPN-RELA					Ependymoma (WHO II)
DNA_FFPE	IlluminaHumanMethylationEPIC	EPN, RELA	0.86082	ST-EPN-RELA					Former PNET
DNA_FFPE	IlluminaHumanMethylationEPIC	EPN, RELA	0.995637	ST-EPN-RELA					Ependymoma (WHO III)
DNA_KRYO	IlluminaHumanMethylationEPIC	EPN, RELA	0.99946	ST-EPN-RELA					Ependymoma (WHO III)
DNA_FFPE	IlluminaHumanMethylationEPIC	EPN, RELA	0.990869	ST-EPN-RELA
DNA_KRYO	IlluminaHumanMethylationEPIC	EPN, RELA	0.991201	ST-EPN-RELA					Ependymoma, NOS
DNA_FFPE	IlluminaHumanMethylationEPIC	EPN, RELA	0.986961	ST-EPN-RELA
DNA_FFPE	IlluminaHumanMethylationEPIC	EPN, RELA	0.571292	ST-EPN-RELA					Ependymoma (WHO III)
DNA_FFPE	IlluminaHumanMethylationEPIC	EPN, RELA	0.701035	ST-EPN-RELA					CNS Neuroblastoma (WHO IV)
DNA_FFPE	IlluminaHumanMethylationEPIC	EPN, RELA	0.784263	ST-EPN-RELA					Ependymoma (WHO III)
DNA_FFPE	IlluminaHumanMethylationEPIC	EPN, RELA	0.999788	ST-EPN-RELA
DNA_FFPE	IlluminaHumanMethylationEPIC	EPN, RELA	0.997522	ST-EPN-RELA		ZFTA-RELA, NOS	DNA-panel seq.		Ependymoma (WHO III)
DNA_FFPE	IlluminaHumanMethylationEPIC	EPN, RELA	0.991059	ST-EPN-RELA		ZFTA-RELA Type 2	RNA-seq. (FFPE)
DNA_FFPE	IlluminaHumanMethylationEPIC	EPN, RELA	0.99788	ST-EPN-RELA		ZFTA-RELA Type 1	RNA-seq. (FFPE)		Ependymoma (WHO III)
DNA_FFPE	IlluminaHumanMethylationEPIC	EPN, RELA	0.998895	ST-EPN-RELA		ZFTA-RELA Type 2	RNA-seq. (FFPE)		Ependymoma (WHO III)
DNA_FFPE	IlluminaHumanMethylationEPIC	EPN, RELA	0.999927	ST-EPN-RELA		ZFTA-RELA Type 2	RNA-seq. (FFPE)		Ependymoma (WHO III)
DNA_FFPE	IlluminaHumanMethylationEPIC	EPN, RELA	0.999912	ST-EPN-RELA		ZFTA-RELA Type 3	RNA-seq. (FFPE)		Ependymoma (WHO III)
DNA_FFPE	IlluminaHumanMethylationEPIC	EPN, RELA	0.998688	ST-EPN-RELA					Ependymoma (WHO III)
DNA_FFPE	IlluminaHumanMethylationEPIC	EPN, RELA	0.937839	ST-EPN-RELA		ZFTA-RELA ind. Breakpoint	RNA-seq. (FFPE)		Ependymoma (WHO III)
DNA_FFPE	IlluminaHumanMethylationEPIC	EPN, RELA	0.999038	ST-EPN-RELA		ZFTA-RELA, NOS	RNA-seq. (FFPE)		Ependymoma (WHO III)
DNA_FFPE	IlluminaHumanMethylationEPIC	EPN, RELA	0.975648	ST-EPN-RELA		ZFTA-RELA Type 2	RNA-seq. (FFPE)		Ependymoma (WHO III)
DNA_FFPE	IlluminaHumanMethylationEPIC	EPN, RELA	0.999455	ST-EPN-RELA		ZFTA-RELA Type 3	RNA-seq. (FFPE)		Ependymoma (WHO III)
DNA_FFPE	IlluminaHumanMethylationEPIC	EPN, RELA	0.999463	ST-EPN-RELA		ZFTA-RELA, NOS	RNA-seq. (FFPE)		Ependymoma (WHO III)
DNA_FFPE	IlluminaHumanMethylationEPIC	EPN, RELA	0.999959	ST-EPN-RELA		ZFTA-RELA, NOS	RNA-seq. (FFPE)		Ependymoma (WHO III)
DNA_FFPE	IlluminaHumanMethylationEPIC	EPN, RELA	0.999196	ST-EPN-RELA		ZFTA-RELA Type 2,3	RNA-seq. (FFPE)		Ependymoma (WHO III)
DNA_FFPE	IlluminaHumanMethylationEPIC	EPN, RELA	0.998347	ST-EPN-RELA		ZFTA-RELA Type 3	RNA-seq. (FFPE)		Ependymoma (WHO III)
DNA_FFPE	IlluminaHumanMethylationEPIC	EPN, RELA	0.999221	ST-EPN-RELA					Ependymoma (WHO III)
DNA_KRYO	IlluminaHumanMethylationEPIC	EPN, RELA	0.999717	ST-EPN-RELA
DNA_FFPE	IlluminaHumanMethylationEPIC	EPN, RELA	0.938611	ST-EPN-RELA					Ependymoma (WHO III)
DNA_FFPE	IlluminaHumanMethylationEPIC	EPN, RELA	0.99954	ST-EPN-RELA		ZFTA-RELA, NOS	RNA-seq. (FFPE)		Ependymoma (WHO III)
DNA_FFPE	IlluminaHumanMethylationEPIC	EPN, RELA	0.982626	ST-EPN-RELA		no fusion detected	RNA-seq. (FFPE)		Ependymoma (WHO III)
DNA_FFPE	IlluminaHumanMethylation450k	EPN, RELA	0.876711	ST-EPN-RELA
DNA_FFPE	IlluminaHumanMethylation450k	EPN, RELA	0.999931	ST-EPN-RELA
DNA_FFPE	IlluminaHumanMethylation450k	EPN, RELA	0.999106	ST-EPN-RELA
DNA_FFPE	IlluminaHumanMethylation450k	EPN, RELA	0.992501	ST-EPN-RELA
DNA_FFPE	IlluminaHumanMethylation450k	EPN, RELA	0.999973	ST-EPN-RELA
DNA_FFPE	IlluminaHumanMethylation450k	EPN, RELA	0.999754	ST-EPN-RELA
DNA_FFPE	IlluminaHumanMethylation450k	EPN, RELA	0.948965	ST-EPN-RELA
DNA_FFPE	IlluminaHumanMethylation450k	EPN, RELA	0.995408	ST-EPN-RELA
DNA_FFPE	IlluminaHumanMethylation450k	EPN, RELA	0.985798	ST-EPN-RELA
DNA_FFPE	IlluminaHumanMethylation450k	EPN, RELA	0.999207	ST-EPN-RELA
DNA_FFPE	IlluminaHumanMethylation450k	EPN, RELA	0.975427	ST-EPN-RELA
DNA_FFPE	IlluminaHumanMethylation450k	EPN, RELA	0.99985	ST-EPN-RELA
DNA_FFPE	IlluminaHumanMethylation450k	EPN, RELA	0.999917	ST-EPN-RELA
DNA_FFPE	IlluminaHumanMethylation450k	EPN, RELA	0.999899	ST-EPN-RELA
DNA_FFPE	IlluminaHumanMethylation450k	EPN, RELA	0.998475	ST-EPN-RELA
DNA_KRYO	IlluminaHumanMethylation450k	EPN, RELA	0.999619	ST-EPN-RELA		ZFTA-RELA Type 2,3	RNA-seq. (FFPE)		Ependymoma, NOS
DNA_KRYO	IlluminaHumanMethylation450k	EPN, RELA	0.999996	ST-EPN-RELA					Ependymoma, NOS
DNA_FFPE	IlluminaHumanMethylation450k	EPN, RELA	0.999992	ST-EPN-RELA					Ependymoma (WHO III)
DNA_FFPE	IlluminaHumanMethylation450k	EPN, RELA	0.999844	ST-EPN-RELA					Anaplastic oligodendroglioma
DNA_FFPE	IlluminaHumanMethylation450k	EPN, RELA	0.998877	ST-EPN-RELA					High grade glioma/ ependymoma
DNA_FFPE	IlluminaHumanMethylation450k	EPN, RELA	0.796317	ST-EPN-RELA
DNA_FFPE	IlluminaHumanMethylation450k	EPN, RELA	0.999838	ST-EPN-RELA					Ependymoma (WHO III)
DNA_FFPE	IlluminaHumanMethylation450k	EPN, RELA	0.999582	ST-EPN-RELA					Former PNET
DNA_FFPE	IlluminaHumanMethylation450k	EPN, RELA	0.99996	ST-EPN-RELA					Ependymoma (WHO III)
DNA_KRYO	IlluminaHumanMethylation450k	EPN, RELA	0.99402	ST-EPN-RELA					Ependymoma, NOS
DNA_FFPE	IlluminaHumanMethylation450k	EPN, RELA	0.999889	ST-EPN-RELA					Former PNET
DNA_FFPE	IlluminaHumanMethylation450k	EPN, RELA	0.999912	ST-EPN-RELA					Former PNET
DNA_FFPE	IlluminaHumanMethylation450k	EPN, RELA	0.999229	ST-EPN-RELA					Glioblastoma (WHO IV)
DNA_KRYO	IlluminaHumanMethylation450k	EPN, RELA	0.999987	ST-EPN-RELA
DNA_KRYO	IlluminaHumanMethylation450k	EPN, RELA	0.999986	ST-EPN-RELA
DNA_FFPE	IlluminaHumanMethylation450k	EPN, RELA	0.990978	ST-EPN-RELA					Ependymoma, NOS
DNA_KRYO	IlluminaHumanMethylation450k	EPN, RELA	0.999916	ST-EPN-RELA					Ependymoma, NOS
DNA_KRYO	IlluminaHumanMethylation450k	EPN, RELA	0.476403	ST-EPN-RELA
DNA_KRYO	IlluminaHumanMethylation450k	EPN, RELA	0.985684	ST-EPN-RELA
DNA_KRYO	IlluminaHumanMethylation450k	EPN, RELA	0.997235	ST-EPN-RELA					Ependymoma, NOS
DNA_FFPE	IlluminaHumanMethylation450k	EPN, RELA	0.99986	ST-EPN-RELA					Former PNET
DNA_KRYO	IlluminaHumanMethylation450k	EPN, RELA	0.999985	ST-EPN-RELA					Ependymoma, NOS
DNA_KRYO	IlluminaHumanMethylation450k	EPN, RELA	0.994689	ST-EPN-RELA					Ependymoma, NOS
DNA_KRYO	IlluminaHumanMethylation450k	EPN, RELA	0.999981	ST-EPN-RELA
DNA_KRYO	IlluminaHumanMethylation450k	EPN, RELA	0.989243	ST-EPN-RELA
DNA_KRYO	IlluminaHumanMethylation450k	EPN, RELA	0.998499	ST-EPN-RELA					Ependymoma, NOS
DNA_FFPE	IlluminaHumanMethylation450k	EPN, RELA	0.998923	ST-EPN-RELA					Ependymoma (WHO III)
DNA_FFPE	IlluminaHumanMethylation450k	EPN, RELA	0.90027	ST-EPN-RELA					Ependymoma, NOS
DNA_KRYO	IlluminaHumanMethylation450k	EPN, RELA	0.985716	ST-EPN-RELA					Ependymoma, NOS
DNA_KRYO	IlluminaHumanMethylation450k	EPN, RELA	0.999981	ST-EPN-RELA
DNA_KRYO	IlluminaHumanMethylation450k	EPN, RELA	0.999435	ST-EPN-RELA
DNA_FFPE	IlluminaHumanMethylation450k	EPN, RELA	0.999746	ST-EPN-RELA					Ependymoma, NOS
DNA_FFPE	IlluminaHumanMethylation450k	EPN, RELA	0.999207	ST-EPN-RELA
DNA_FFPE	IlluminaHumanMethylation450k	EPN, RELA	0.994115	ST-EPN-RELA					Ependymoma, NOS
DNA_FFPE	IlluminaHumanMethylation450k	EPN, RELA	0.905108	ST-EPN-RELA
DNA_KRYO	IlluminaHumanMethylation450k	EPN, RELA	0.999816	ST-EPN-RELA
DNA_KRYO	IlluminaHumanMethylation450k	EPN, RELA	0.952687	ST-EPN-RELA					pediatric Glioblastoma
DNA_KRYO	IlluminaHumanMethylation450k	EPN, RELA	0.999926	ST-EPN-RELA					Ependymoma, NOS
DNA_KRYO	IlluminaHumanMethylation450k	EPN, RELA	0.999018	ST-EPN-RELA					Ependymoma, NOS
DNA_KRYO	IlluminaHumanMethylation450k	EPN, RELA	0.999811	ST-EPN-RELA					Ependymoma, NOS
DNA_KRYO	IlluminaHumanMethylation450k	EPN, RELA	0.999996	ST-EPN-RELA					Former PNET
DNA_KRYO	IlluminaHumanMethylation450k	EPN, RELA	0.99999	ST-EPN-RELA		ZFTA-RELA Type 1	RNA-seq. (FFPE)	RT-PCR	Ependymoma (WHO III)	Pajtler et al., Cancer Cell, 2015
DNA_KRYO	IlluminaHumanMethylation450k	EPN, RELA	0.944435	ST-EPN-RELA					Ependymoma, NOS
DNA_KRYO	IlluminaHumanMethylation450k	EPN, RELA	0.999819	ST-EPN-RELA					Ependymoma / Astrocytoma
DNA_KRYO	IlluminaHumanMethylation450k	EPN, RELA	0.999583	ST-EPN-RELA					Ependymoma, NOS
DNA_KRYO	IlluminaHumanMethylation450k	EPN, RELA	0.982484	ST-EPN-RELA		ZFTA-RELA Type 2	RNA-seq. (FFPE)	RT-PCR	Ependymoma, NOS	Pajtler et al., Cancer Cell, 2015
DNA_KRYO	IlluminaHumanMethylation450k	EPN, RELA	0.999973	ST-EPN-RELA					Ependymoma (WHO III)
DNA_KRYO	IlluminaHumanMethylation450k	EPN, RELA	0.999999	ST-EPN-RELA		ZFTA-RELA Type 1	RT-PCR		Ependymoma (WHO III)	Pajtler et al., Cancer Cell, 2015
DNA_KRYO	IlluminaHumanMethylation450k	EPN, RELA	0.999815	ST-EPN-RELA					Former PNET
DNA_KRYO	IlluminaHumanMethylation450k	EPN, RELA	0.999998	ST-EPN-RELA					Former PNET
DNA_KRYO	IlluminaHumanMethylation450k	EPN, RELA	0.991235	ST-EPN-RELA					Former PNET
DNA_KRYO	IlluminaHumanMethylation450k	EPN, RELA	0.999941	ST-EPN-RELA					Former PNET
DNA_KRYO	IlluminaHumanMethylation450k	EPN, RELA	0.999994	ST-EPN-RELA		ZFTA-RELA Type 1	RNA-seq. (FFPE)	RT-PCR	Ependymoma (WHO III)	Pajtler et al., Cancer Cell, 2015
DNA_KRYO	IlluminaHumanMethylation450k	EPN, RELA	0.999996	ST-EPN-RELA		ZFTA-RELA ind. Breakpoint	RNA-seq. (FFPE)	RT-PCR	Ependymoma (WHO III)	Pajtler et al., Cancer Cell, 2015
DNA_KRYO	IlluminaHumanMethylation450k	EPN, RELA	0.999996	ST-EPN-RELA		ZFTA-RELA Type 1	RNA-seq. (FFPE)	RT-PCR	Ependymoma (WHO III)	Pajtler et al., Cancer Cell, 2015
DNA_KRYO	IlluminaHumanMethylation450k	EPN, RELA	0.999937	ST-EPN-RELA		(1) ZFTA-RELA Type 2 (2) ZFTA-RELA Type 1	RNA-seq. (FFPE)	RT-PCR	Ependymoma (WHO III)	Pajtler et al., Cancer Cell, 2015
DNA_KRYO	IlluminaHumanMethylation450k	EPN, RELA	0.935359	ST-EPN-RELA		ZFTA-RELA Type 1,2	RT-PCR		Ependymoma (WHO III)	Pajtler et al., Cancer Cell, 2015
DNA_KRYO	IlluminaHumanMethylation450k	EPN, RELA	0.999963	ST-EPN-RELA		ZFTA-RELA Type 2	RNA-seq. (FFPE)	RT-PCR	Ependymoma (WHO III)	Pajtler et al., Cancer Cell, 2015
DNA_KRYO	IlluminaHumanMethylation450k	EPN, RELA	0.999982	ST-EPN-RELA		ZFTA-RELA Type 1	RNA-seq. (FFPE)	RT-PCR	Ependymoma, NOS	Pajtler et al., Cancer Cell, 2015
DNA_KRYO	IlluminaHumanMethylation450k	EPN, RELA	0.999973	ST-EPN-RELA		ZFTA-RELA Type 1	RNA-seq. (FFPE)	RT-PCR	Ependymoma (WHO III)	Pajtler et al., Cancer Cell, 2015
DNA_KRYO	IlluminaHumanMethylation450k	EPN, RELA	0.999766	ST-EPN-RELA		ZFTA-RELA Type 1,2	RT-PCR		Ependymoma, NOS	Pajtler et al., Cancer Cell, 2015
DNA_KRYO	IlluminaHumanMethylation450k	EPN, RELA	0.999998	ST-EPN-RELA		ZFTA-RELA Type 1	RT-PCR		Ependymoma (WHO III)	Pajtler et al., Cancer Cell, 2015
DNA_KRYO	IlluminaHumanMethylation450k	EPN, RELA	0.999988	ST-EPN-RELA		ZFTA-RELA Type 1	RT-PCR		Ependymoma (WHO III)	Pajtler et al., Cancer Cell, 2015
DNA_KRYO	IlluminaHumanMethylation450k	EPN, RELA	0.999706	ST-EPN-RELA		ZFTA-RELA Type 1	RT-PCR		Ependymoma, NOS
DNA_KRYO	IlluminaHumanMethylation450k	EPN, RELA	0.999989	ST-EPN-RELA		ZFTA-RELA Type 1	RNA-seq. (FFPE)		Ependymoma, NOS
DNA_KRYO	IlluminaHumanMethylation450k	EPN, RELA	0.998252	ST-EPN-RELA					Former PNET
DNA_KRYO	IlluminaHumanMethylation450k	EPN, RELA	0.999945	ST-EPN-RELA					Ependymoma, NOS
DNA_KRYO	IlluminaHumanMethylation450k	EPN, RELA	0.999814	ST-EPN-RELA					Ependymoma, NOS
DNA_FFPE	IlluminaHumanMethylation450k	EPN, RELA	0.999361	ST-EPN-RELA					Glioblastoma (WHO IV)
DNA_KRYO	IlluminaHumanMethylation450k	EPN, RELA	0.999934	ST-EPN-RELA					Ependymoma (WHO III)
DNA_FFPE	IlluminaHumanMethylation450k	EPN, RELA	0.998629	ST-EPN-RELA					Ependymoma (WHO III)
DNA_FFPE	IlluminaHumanMethylation450k	EPN, RELA	0.226509	ST-EPN-RELA					Ependymoma, NOS
DNA_FFPE	IlluminaHumanMethylation450k	EPN, RELA	0.997541	ST-EPN-RELA					Ependymoma (WHO III)
DNA_FFPE	IlluminaHumanMethylation450k	EPN, RELA	0.999992	ST-EPN-RELA					Ependymoma (WHO III)
DNA_FFPE	IlluminaHumanMethylation450k	EPN, RELA	0.999992	ST-EPN-RELA					Ependymoma (WHO III)
DNA_FFPE	IlluminaHumanMethylation450k	EPN, RELA	0.940625	ST-EPN-RELA					Ependymoma, NOS
DNA_FFPE	IlluminaHumanMethylation450k	EPN, RELA	0.999358	ST-EPN-RELA					Ependymoma, NOS
DNA_FFPE	IlluminaHumanMethylation450k	EPN, RELA	0.999848	ST-EPN-RELA					Ependymoma (WHO III)
DNA_FFPE	IlluminaHumanMethylation450k	EPN, RELA	0.997614	ST-EPN-RELA					Ependymoma (WHO III)
DNA_FFPE	IlluminaHumanMethylation450k	EPN, RELA	0.999983	ST-EPN-RELA					Ependymoma, NOS
DNA_FFPE	IlluminaHumanMethylation450k	EPN, RELA	0.999993	ST-EPN-RELA					Ependymoma, NOS
DNA_FFPE	IlluminaHumanMethylation450k	EPN, RELA	0.999229	ST-EPN-RELA					Ependymoma (WHO III)
DNA_FFPE	IlluminaHumanMethylation450k	EPN, RELA	0.999964	ST-EPN-RELA					Ependymoma, NOS
DNA_FFPE	IlluminaHumanMethylation450k	EPN, RELA	0.999997	ST-EPN-RELA					Ependymoma (WHO III)
DNA_FFPE	IlluminaHumanMethylation450k	EPN, RELA	0.998986	ST-EPN-RELA					Ependymoma (WHO III)
DNA_FFPE	IlluminaHumanMethylation450k	EPN, RELA	0.999995	ST-EPN-RELA					Ependymoma (WHO III)
DNA_FFPE	IlluminaHumanMethylation450k	EPN, RELA	0.992257	ST-EPN-RELA					Ependymoma, NOS
DNA_FFPE	IlluminaHumanMethylation450k	EPN, RELA	0.999904	ST-EPN-RELA					Ependymoma (WHO III)
DNA_FFPE	IlluminaHumanMethylation450k	EPN, RELA	0.989886	ST-EPN-RELA					Ependymoma, NOS
DNA_FFPE	IlluminaHumanMethylation450k	EPN, RELA	0.998518	ST-EPN-RELA					Ependymoma (WHO III)
DNA_FFPE	IlluminaHumanMethylation450k	EPN, RELA	0.979464	ST-EPN-RELA					Ependymoma (WHO III)
DNA_FFPE	IlluminaHumanMethylation450k	EPN, RELA	0.998954	ST-EPN-RELA					Ependymoma, NOS
DNA_FFPE	IlluminaHumanMethylation450k	EPN, RELA	0.999976	ST-EPN-RELA					Ependymoma (WHO III)
DNA_FFPE	IlluminaHumanMethylation450k	EPN, RELA	0.999957	ST-EPN-RELA					Ependymoma, NOS
DNA_FFPE	IlluminaHumanMethylation450k	EPN, RELA	0.999975	ST-EPN-RELA					Ependymoma (WHO III)
DNA_FFPE	IlluminaHumanMethylation450k	EPN, RELA	0.999909	ST-EPN-RELA					Ependymoma (WHO III)
DNA_FFPE	IlluminaHumanMethylation450k	EPN, RELA	0.999982	ST-EPN-RELA					Ependymoma (WHO III)
DNA_FFPE	IlluminaHumanMethylation450k	EPN, RELA	0.999988	ST-EPN-RELA					Ependymoma (WHO III)
DNA_FFPE	IlluminaHumanMethylation450k	EPN, RELA	0.999994	ST-EPN-RELA					Ependymoma (WHO III)
DNA_FFPE	IlluminaHumanMethylation450k	EPN, RELA	0.999843	ST-EPN-RELA					Ependymoma (WHO III)
DNA_FFPE	IlluminaHumanMethylation450k	EPN, RELA	0.998561	ST-EPN-RELA					Ependymoma (WHO III)
DNA_FFPE	IlluminaHumanMethylation450k	EPN, RELA	0.991363	ST-EPN-RELA					Ependymoma, NOS
DNA_FFPE	IlluminaHumanMethylation450k	EPN, RELA	0.994889	ST-EPN-RELA					Ependymoma (WHO III)
DNA_FFPE	IlluminaHumanMethylation450k	EPN, RELA	0.957243	ST-EPN-RELA					Ependymoma, NOS
DNA_FFPE	IlluminaHumanMethylation450k	EPN, RELA	0.90312	ST-EPN-RELA					Ependymoma (WHO III)
DNA_FFPE	IlluminaHumanMethylation450k	EPN, RELA	0.999966	ST-EPN-RELA					Ependymoma (WHO II)
DNA_FFPE	IlluminaHumanMethylation450k	EPN, RELA	0.999712	ST-EPN-RELA					Ependymoma, NOS
DNA_FFPE	IlluminaHumanMethylation450k	EPN, RELA	0.999922	ST-EPN-RELA					Ependymoma, NOS
DNA_FFPE	IlluminaHumanMethylation450k	EPN, RELA	0.999211	ST-EPN-RELA					Ependymoma (WHO III)
DNA_FFPE	IlluminaHumanMethylation450k	EPN, RELA	0.998703	ST-EPN-RELA					Ependymoma (WHO III)
DNA_FFPE	IlluminaHumanMethylation450k	EPN, RELA	0.975163	ST-EPN-RELA					Ependymoma, NOS
DNA_FFPE	IlluminaHumanMethylation450k	EPN, RELA	0.990646	ST-EPN-RELA					Ependymoma, NOS
DNA_FFPE	IlluminaHumanMethylation450k	EPN, RELA	0.99997	ST-EPN-RELA					Ependymoma (WHO III)
DNA_FFPE	IlluminaHumanMethylation450k	EPN, RELA	0.995342	ST-EPN-RELA					Ependymoma, NOS
DNA_FFPE	IlluminaHumanMethylation450k	EPN, RELA	0.999726	ST-EPN-RELA					Ependymoma, NOS
DNA_FFPE	IlluminaHumanMethylation450k	EPN, RELA	0.999995	ST-EPN-RELA					Ependymoma, NOS
DNA_FFPE	IlluminaHumanMethylation450k	EPN, RELA	0.997782	ST-EPN-RELA					Ependymoma, NOS
DNA_FFPE	IlluminaHumanMethylation450k	EPN, RELA	0.999984	ST-EPN-RELA					Ependymoma (WHO III)
DNA_KRYO	IlluminaHumanMethylation450k	EPN, RELA	0.999107	ST-EPN-RELA					Ependymoma, NOS
DNA_KRYO	IlluminaHumanMethylation450k	EPN, RELA	0.999811	ST-EPN-RELA
DNA_FFPE	IlluminaHumanMethylation450k	EPN, RELA	0.999909	ST-EPN-RELA					Ependymoma (WHO III)
DNA_KRYO	IlluminaHumanMethylation450k	EPN, RELA	0.789629	ST-EPN-RELA		ZFTA-RELA Type 1	RT-PCR		Ependymoma, NOS	Pajtler et al., Cancer Cell, 2015
DNA_FFPE	IlluminaHumanMethylation450k	EPN, RELA	0.985387	ST-EPN-RELA					Ependymoma, NOS
DNA_FFPE	IlluminaHumanMethylation450k	EPN, RELA	0.995995	ST-EPN-RELA		ZFTA-RELA Type 1	RNA-seq. (FFPE)		Ependymoma (WHO III)
DNA_FFPE	IlluminaHumanMethylation450k	EPN, RELA	0.999431	ST-EPN-RELA		ZFTA-RELA ind. Breakpoint	RNA-seq. (FFPE)		Ependymoma (WHO III)
DNA_FFPE	IlluminaHumanMethylation450k	EPN, RELA	0.97613	ST-EPN-RELA		ZFTA-RELA, NOS	RNA-seq. (FFPE)		Ependymoma (WHO III)
DNA_FFPE	IlluminaHumanMethylation450k	EPN, RELA	0.950433	ST-EPN-RELA		ZFTA-RELA Type 1	RNA-seq. (FFPE)		Ependymoma (WHO III)
DNA_FFPE	IlluminaHumanMethylation450k	EPN, RELA	0.98956	ST-EPN-RELA		ZFTA-RELA Type 2	RNA-seq. (FFPE)		Ependymoma (WHO III)
DNA_FFPE	IlluminaHumanMethylation450k	EPN, RELA	0.996383	ST-EPN-RELA		ZFTA-RELA Type 1	RNA-seq. (FFPE)		Ependymoma (WHO III)
DNA_FFPE	IlluminaHumanMethylation450k	EPN, RELA	0.987454	ST-EPN-RELA		ZFTA-RELA Type 3	RNA-seq. (FFPE)		Ependymoma (WHO III)
DNA_KRYO	IlluminaHumanMethylation450k	EPN, RELA	0.997165	ST-EPN-RELA
DNA_KRYO	IlluminaHumanMethylation450k	EPN, RELA	0.999964	ST-EPN-RELA
DNA_KRYO	IlluminaHumanMethylation450k	EPN, RELA	0.99357	ST-EPN-RELA
DNA_KRYO	IlluminaHumanMethylation450k	EPN, RELA	0.999808	ST-EPN-RELA
DNA_KRYO	IlluminaHumanMethylation450k	EPN, RELA	0.999967	ST-EPN-RELA
DNA_KRYO	IlluminaHumanMethylation450k	EPN, RELA	0.921357	ST-EPN-RELA
DNA_FFPE	IlluminaHumanMethylation450k	EPN, RELA	0.980417	ST-EPN-RELA
DNA_FFPE	IlluminaHumanMethylation450k	EPN, RELA	0.999947	ST-EPN-RELA
DNA_FFPE	IlluminaHumanMethylation450k	EPN, RELA	0.999987	ST-EPN-RELA
DNA_FFPE	IlluminaHumanMethylation450k	EPN, RELA	0.999969	ST-EPN-RELA					Ependymoma (WHO III)
DNA_FFPE	IlluminaHumanMethylation450k	EPN, RELA	0.999984	ST-EPN-RELA					Ependymoma (WHO III)
DNA_FFPE	IlluminaHumanMethylation450k	EPN, RELA	0.998501	ST-EPN-RELA					Ependymoma (WHO III)
DNA_FFPE	IlluminaHumanMethylation450k	EPN, RELA	0.99959	ST-EPN-RELA
DNA_FFPE	IlluminaHumanMethylation450k	EPN, RELA	0.996138	ST-EPN-RELA
DNA_FFPE	IlluminaHumanMethylation450k	EPN, RELA	0.991214	ST-EPN-RELA
DNA_FFPE	IlluminaHumanMethylation450k	EPN, RELA	0.994516	ST-EPN-RELA
DNA_FFPE	IlluminaHumanMethylation450k	EPN, RELA	0.999899	ST-EPN-RELA
DNA_FFPE	IlluminaHumanMethylation450k	EPN, RELA	0.999983	ST-EPN-RELA
DNA_FFPE	IlluminaHumanMethylation450k	EPN, RELA	0.959781	ST-EPN-RELA
DNA_FFPE	IlluminaHumanMethylation450k	EPN, RELA	0.867315	ST-EPN-RELA					Ependymoma (WHO II)
DNA_FFPE	IlluminaHumanMethylation450k	EPN, RELA	0.999954	ST-EPN-RELA		ZFTA-RELA Type 1	RNA-seq. (FFPE)		Ependymoma (WHO II)
DNA_KRYO	IlluminaHumanMethylation450k	EPN, RELA	0.999872	ST-EPN-RELA
DNA_FFPE	IlluminaHumanMethylation450k	EPN, RELA	0.959066	ST-EPN-RELA					Astroblastoma /Ependymoma
DNA_KRYO	IlluminaHumanMethylation450k	EPN, RELA	0.999745	ST-EPN-RELA					Ependymoma, NOS
DNA_FFPE	IlluminaHumanMethylation450k	EPN, RELA	0.999416	ST-EPN-RELA					Medulloblastoma
DNA_KRYO	IlluminaHumanMethylation450k	EPN, RELA	0.975155	ST-EPN-RELA		ZFTA-RELA Type 1	RT-PCR		Ependymoma, NOS
DNA_KRYO	IlluminaHumanMethylation450k	EPN, RELA	0.999892	ST-EPN-RELA
DNA_FFPE	IlluminaHumanMethylation450k	EPN, RELA	0.99989	ST-EPN-RELA
DNA_FFPE	IlluminaHumanMethylation450k	EPN, RELA	0.995213	ST-EPN-RELA		no fusion detected	RNA-seq. (FFPE)		Former PNET
DNA_FFPE	IlluminaHumanMethylation450k	EPN, RELA	0.995946	ST-EPN-RELA					Ependymoma (WHO III)
DNA_FFPE	IlluminaHumanMethylation450k	EPN, RELA	0.980862	ST-EPN-RELA					Ependymoma (WHO III)
DNA_FFPE	IlluminaHumanMethylation450k	EPN, RELA	0.999254	ST-EPN-RELA					Ependymoma (WHO III)
DNA_FFPE	IlluminaHumanMethylation450k	EPN, RELA	0.999853	ST-EPN-RELA					Ependymoma (WHO III)
DNA_FFPE	IlluminaHumanMethylation450k	EPN, RELA	0.981634	ST-EPN-RELA					Ependymoma (WHO III)
DNA_FFPE	IlluminaHumanMethylation450k	EPN, RELA	0.99809	ST-EPN-RELA					Ependymoma (WHO III)
DNA_FFPE	IlluminaHumanMethylation450k	EPN, RELA	0.997856	ST-EPN-RELA					Ependymoma (WHO III)
DNA_KRYO	IlluminaHumanMethylation450k	EPN, RELA	0.0929133	ST-EPN-RELA
DNA_KRYO	IlluminaHumanMethylation450k	EPN, RELA	0.998955	ST-EPN-RELA
DNA_FFPE	IlluminaHumanMethylation450k	EPN, RELA	0.999106	ST-EPN-RELA
DNA_FFPE	IlluminaHumanMethylation450k	EPN, RELA	0.989184	ST-EPN-RELA
DNA_FFPE	IlluminaHumanMethylation450k	MB, SHH CHL AD	0.264877	ST-EPN-RELA
DNA_KRYO	IlluminaHumanMethylation450k	EPN, RELA	0.101433	ST-EPN-RELA		no fusion detected	RNA-seq. (FFPE)
DNA_FFPE	IlluminaHumanMethylation450k	EPN, RELA	0.639404	ST-EPN-RELA
DNA_FFPE	IlluminaHumanMethylationEPIC	EPN, RELA	0.155822	ST-EPN-RELA
DNA_FFPE	IlluminaHumanMethylation450k	ATRT, SHH	0.842002	ST-EPN-RELA					Former PNET
DNA_FFPE	IlluminaHumanMethylation450k	EPN, RELA	0.988463	ST-EPN-RELA					Former PNET
DNA_FFPE	IlluminaHumanMethylationEPIC	PXA	0.108858	ST-EPN-RELA
DNA_FFPE	IlluminaHumanMethylationEPIC	EPN, RELA	0.192438	ST-EPN-RELA					Ependymoma, NOS
DNA_FFPE	IlluminaHumanMethylationEPIC	EPN, RELA	0.655859	ST-EPN-RELA
DNA_FFPE	IlluminaHumanMethylation450k	EPN, RELA	0.402517	ST-EPN-RELA
DNA_FFPE	IlluminaHumanMethylation450k	EPN, RELA	0.725468	ST-EPN-RELA					Ependymoma, NOS
DNA_FFPE	IlluminaHumanMethylation450k	EPN, RELA	0.96122	ST-EPN-RELA					Ependymoma, NOS
DNA_FFPE	IlluminaHumanMethylation450k	EPN, PF B	0.465242	ST-EPN-RELA					Ependymoma, NOS
DNA_FFPE	IlluminaHumanMethylation450k	EPN, RELA	0.405413	ST-EPN-RELA					Ependymoma, NOS
DNA_FFPE	IlluminaHumanMethylation450k	EPN, RELA	0.310757	ST-EPN-RELA					Ependymoma, NOS
DNA_FFPE	IlluminaHumanMethylationEPIC	EPN, RELA	0.502148	ST-EPN-RELA		no fusion detected	RNA-seq. (FFPE)		Ependymoma (WHO III)
DNA_FFPE	IlluminaHumanMethylationEPIC	EPN, RELA	0.0631038	ST-EPN-RELA
DNA_FFPE	IlluminaHumanMethylation450k	EPN, RELA	0.999885	ST-EPN-RELA
DNA_KRYO	IlluminaHumanMethylation450k	EPN, RELA	0.999849	ST-EPN-RELA
DNA_FFPE	IlluminaHumanMethylation450k	EPN, RELA	0.999787	ST-EPN-RELA		ZFTA-RELA Type 1	RNA-seq. (FFPE)	RNA seq. (FF) / RT-PCR	Ependymoma (WHO III)	Pajtler et al., Cancer Cell, 2015
DNA_KRYO	IlluminaHumanMethylation450k	EPN, RELA	0.999988	ST-EPN-RELA		ZFTA-RELA Type 3	RNA-seq. (FFPE)	RNA seq. (FF)	Ependymoma (WHO III)
DNA_KRYO	IlluminaHumanMethylation450k	EPN, RELA	0.990259	ST-EPN-RELA		ZFTA-RELA Type 1	RNA-seq. (FFPE)		Ependymoma, NOS
DNA_KRYO	IlluminaHumanMethylation450k	EPN, RELA	0.999983	ST-EPN-RELA		ZFTA-RELA Type 3	RNA-seq. (FF)	RT-PCR	Ependymoma (WHO III)	Pajtler et al., Cancer Cell, 2015	Pajtler et al., Cancer Cell, 2015
DNA_KRYO	IlluminaHumanMethylation450k	EPN, RELA	0.999784	ST-EPN-RELA		ZFTA-RELA Type 2	RNA-seq. (FFPE)	RNA seq. (FF) / RT-PCR	Ependymoma (WHO III)	Pajtler et al., Cancer Cell, 2015	Pajtler et al., Cancer Cell, 2015
DNA_KRYO	IlluminaHumanMethylation450k	EPN, RELA	0.973941	ST-EPN-RELA		ZFTA-RELA Type 1	RNA-seq. (FFPE)	RNA seq. (FF) / RT-PCR	Ependymoma (WHO III)	Pajtler et al., Cancer Cell, 2015	Pajtler et al., Cancer Cell, 2015
DNA_KRYO	IlluminaHumanMethylation450k	EPN, RELA	0.999941	ST-EPN-RELA		ZFTA-RELA Type 1	RNA-seq. (FFPE)	RNA seq. (FF) / RT-PCR	Ependymoma (WHO III)	Pajtler et al., Cancer Cell, 2015	Pajtler et al., Cancer Cell, 2015
DNA_KRYO	IlluminaHumanMethylation450k	EPN, RELA	0.999844	ST-EPN-RELA		ZFTA-RELA Type 1	RNA-seq. (FF)	RT-PCR	Ependymoma (WHO III)	Pajtler et al., Cancer Cell, 2015	Mack et al., Nature, 2018
DNA_KRYO	IlluminaHumanMethylation450k	EPN, RELA	0.999599	ST-EPN-RELA		ZFTA-RELA Type 3	RNA-seq. (FF)	RT-PCR	Ependymoma (WHO III)	Pajtler et al., Cancer Cell, 2015	Mack et al., Nature, 2018
DNA_KRYO	IlluminaHumanMethylation450k	EPN, RELA	0.997613	ST-EPN-RELA		ZFTA-RELA Type 2,3	RNA-seq. (FF)	RT-PCR	Ependymoma, NOS
DNA_KRYO	IlluminaHumanMethylation450k	EPN, RELA	0.999967	ST-EPN-RELA		ZFTA-RELA Type 1	RNA-seq. (FF)	RT-PCR	Ependymoma (WHO III)	Pajtler et al., Cancer Cell, 2015
DNA_KRYO	IlluminaHumanMethylation450k	EPN, RELA	0.533026	ST-EPN-RELA	yes (cat. iii)	ZFTA-SS18	RNA-seq. (FF)	RT-PCR	Ependymoma, NOS	Pajtler et al., Cancer Cell, 2015
DNA_KRYO	IlluminaHumanMethylation450k	EPN, RELA	0.999972	ST-EPN-RELA		ZFTA-RELA Type 1	RNA-seq. (FF)		Ependymoma, NOS		Mack et al., Nature, 2018
DNA_KRYO	IlluminaHumanMethylation450k	EPN, RELA	0.999968	ST-EPN-RELA		ZFTA-RELA Type 2,3	RNA-seq. (FF)		Ependymoma, NOS		Mack et al., Nature, 2018
DNA_KRYO	IlluminaHumanMethylation450k	EPN, RELA	0.999919	ST-EPN-RELA		ZFTA-RELA Type 1	RNA-seq. (FF)		Ependymoma, NOS		Mack et al., Nature, 2018
DNA_KRYO	IlluminaHumanMethylation450k	EPN, RELA	0.953882	ST-EPN-RELA	yes (cat. i)	(1) SYVN1-MAJIN, (2) NFIB-VPS51	RNA-seq. (FF)	RT-PCR	Ependymoma (WHO III)
DNA_KRYO	IlluminaHumanMethylationEPIC	EPN, RELA	0.99997	ST-EPN-RELA		(1) ZFTA-MACROD1 (2) MACROD1-RELA	RNA-seq. (FF)
DNA_KRYO	IlluminaHumanMethylation450k	EPN, RELA	0.555985	ST-EPN-RELA		ZFTA-RELA Type 1	RNA-seq. (FF)		Ependymoma, NOS
