# Supplementary material for: Cross-Species Genomics Reveals Oncogenic Dependencies in ZFTA/C11orf95 Fusion–Positive Supratentorial Ependymomas
Source: Oxford University Press journal article supplement (doi:10.1158/2159-8290.cd-20-0963), 2021-04-20
Supplement: 21598290cd200963-sup-246541_2_supp_7049906_qrnhl5.xlsx [file 21598290cd200963-sup-246541_2_supp_7049906_qrnhl5.xlsx]

## Sheet: Legend
Suppl. Table S5: GO analysis for C11orf95-target models specific DEGs
ZFTA-RELA GO	Gene ontology analysis of differentially expressed genes in the ZFTA-RELA mouse model compared to the YAP1-MAMLD1 model
ZFTA-NCOA2 GO	Gene ontology analysis of differentially expressed genes in the ZFTA-NCOA2 mouse model compared to the YAP1-MAMLD1 model
ZFTA-MAML2 GO	Gene ontology analysis of differentially expressed genes in the ZFTA-MAML2 mouse model compared to the YAP1-MAMLD1 model
Comb inter species GO	Gene ontology analyses on differentially expressed genes shared between ZFTA fusion mouse models (compared against YAP1-MAMLD1) and human ZFTA-RELA tumors (compared to all molecular ependymoma groups)
pathways overlapping between all models are marked in red
Overlap of pathways between ZFTA fusion driven models:

## Sheet: ZFTA-RELA GO
GOID	GOTerm	Ontology Source	Term PValue	Term PValue Corrected with Bonferroni step down	Group PValue	Group PValue Corrected with Bonferroni step down	GOLevels	GOGroups	% Associated Genes	Nr. Genes	Associated Genes Found
GO:0003320	PPAR signaling pathway	KEGG_10.02.2016	0.0024	0.019	0.0024	0.0074	[-1]	Group0	6.09756	5	[Acaa1a, Acsbg1, Dbi, Ppara, Slc27a1]
GO:0004390	Hippo signaling pathway	KEGG_10.02.2016	0.0085	0.051	0.0085	0.017	[-1]	Group1	3.8961	6	[Ccnd1, Fgf1, Fzd9, Gli2, Llgl1, Sox2]
GO:0004010	MAPK signaling pathway	KEGG_10.02.2016	0.21	0.43	0.066	0.066	[-1]	Group2	1.9685	5	[Fgf1, Fgf15, Fgf3, Fgfr3, Ntrk2]
GO:0004014	Ras signaling pathway	KEGG_10.02.2016	0.05	0.2	0.066	0.066	[-1]	Group2	2.5974	6	[Fgf1, Fgf15, Fgf3, Fgfr3, Pik3r1, Rassf5]
GO:0004015	Rap1 signaling pathway	KEGG_10.02.2016	0.011	0.059	0.066	0.066	[-1]	Group2	3.25581	7	[Fgf1, Fgf15, Fgf3, Fgfr3, Pik3r1, Rap1gap, Rassf5]
GO:0004151	PI3K-Akt signaling pathway	KEGG_10.02.2016	0.063	0.19	0.066	0.066	[-1]	Group2	2.28571	8	[Ccnd1, Col9a3, Fgf1, Fgf15, Fgf3, Fgfr3, Itga8, Pik3r1]
GO:0004810	Regulation of actin cytoskeleton	KEGG_10.02.2016	0.0035	0.024	0.066	0.066	[-1]	Group2	3.66972	8	[Arpc1b, Fgf1, Fgf15, Fgf3, Fgfr3, Itga8, Pik3r1, Pip5k1b]
GO:0005166	HTLV-I infection	KEGG_10.02.2016	0.25	0.25	0.066	0.066	[-1]	Group2	1.77936	5	[Ccnd1, Cdkn2a, Cdkn2c, Fzd9, Pik3r1]
GO:0005200	Pathways in cancer	KEGG_10.02.2016	0.0019	0.017	0.066	0.066	[-1]	Group2	3.01508	12	[Ar, Ccnd1, Cdkn2a, Fgf1, Fgf15, Fgf3, Fgfr3, Fzd9, Gli2, Gli3, Pik3r1, Rassf5]
GO:0005218	Melanoma	KEGG_10.02.2016	0.00016	0.0016	0.066	0.066	[-1]	Group2	8.33333	6	[Ccnd1, Cdkn2a, Fgf1, Fgf15, Fgf3, Pik3r1]

## Sheet: ZFTA-NCOA2 GO
GOID	GOTerm	Ontology Source	Term PValue	Term PValue Corrected with Bonferroni step down	Group PValue	Group PValue Corrected with Bonferroni step down	GOLevels	GOGroups	% Associated Genes	Nr. Genes	Associated Genes Found
GO:0004390	Hippo signaling pathway	KEGG_10.02.2016	0.0095	0.11	0.00044	0.0013	[-1]	Group2	3.8961	6	[Bmp7, Ccnd1, Ccnd3, Dvl2, Gli2, Ywhaz]
GO:0004010	MAPK signaling pathway	KEGG_10.02.2016	0.12	0.25	1.3e-06	6.7e-06	[-1]	Group4	2.3622	6	[Akt1, Fgf15, Fgfr1, Mapk1, Pdgfrb, Ppp3cb]
GO:0004014	Ras signaling pathway	KEGG_10.02.2016	0.0057	0.1	1.3e-06	6.7e-06	[-1]	Group4	3.4632	8	[Akt1, Efna2, Fgf15, Fgfr1, Gng8, Igf1, Mapk1, Pdgfrb]
GO:0004015	Rap1 signaling pathway	KEGG_10.02.2016	0.0002	0.0076	1.3e-06	6.7e-06	[-1]	Group4	4.65116	10	[Akt1, Cnr1, Efna2, Fgf15, Fgfr1, Gnas, Igf1, Mapk1, Pdgfrb, Plcb3]
GO:0004151	PI3K-Akt signaling pathway	KEGG_10.02.2016	0.00078	0.024	1.3e-06	6.7e-06	[-1]	Group4	3.42857	12	[Akt1, Ccnd1, Ccnd3, Efna2, Fgf15, Fgfr1, Gng8, Igf1, Itga9, Mapk1, Pdgfrb, Ywhaz]
GO:0004810	Regulation of actin cytoskeleton	KEGG_10.02.2016	0.004	0.081	1.3e-06	6.7e-06	[-1]	Group4	3.66972	8	[Fgf15, Fgfr1, Iqgap2, Itga9, Mapk1, Pdgfrb, Pip5k1b, Pxn]
GO:0005166	HTLV-I infection	KEGG_10.02.2016	0.0016	0.039	1.3e-06	6.7e-06	[-1]	Group4	3.55872	10	[Akt1, Ccnd1, Ccnd3, Cdkn2a, Chek1, Dvl2, Nfatc4, Pdgfrb, Ppp3cb, Stat5b]
GO:0005200	Pathways in cancer	KEGG_10.02.2016	5.6e-05	0.0021	1.3e-06	6.7e-06	[-1]	Group4	3.76884	15	[Akt1, Ccnd1, Cdkn2a, Dapk3, Dvl2, Fgf15, Fgfr1, Gli2, Gnas, Gng8, Igf1, Mapk1, Pdgfrb, Plcb3, Stat5b]
GO:0005218	Melanoma	KEGG_10.02.2016	1.7e-06	7.2e-05	1.3e-06	6.7e-06	[-1]	Group4	11.1111	8	[Akt1, Ccnd1, Cdkn2a, Fgf15, Fgfr1, Igf1, Mapk1, Pdgfrb]
GO:0004115	p53 signaling pathway	KEGG_10.02.2016	1.3e-05	0.00054	1.3e-06	6.7e-06	[-1]	Group4	10.2941	7	[Ccnb1, Ccnd1, Ccnd3, Cdkn2a, Chek1, Igf1, Steap3]
GO:0000071	Fatty acid degradation	KEGG_10.02.2016	0.00025	0.009	0.00025	0.001	[-1]	Group0	10.2041	5	[Acaa2, Acat1, Aldh2, Cpt1b, Hadha]
GO:0004144	Endocytosis	KEGG_10.02.2016	0.38	0.38	0.38	0.38	[-1]	Group1	1.79211	5	[Agap1, Gbf1, Pip5k1b, Rab11fip4, Rbsn]
GO:0004022	cGMP-PKG signaling pathway	KEGG_10.02.2016	0.052	0.26	0.00044	0.0013	[-1]	Group2	2.90698	5	[Akt1, Mapk1, Nfatc4, Plcb3, Ppp3cb]
GO:0004310	Wnt signaling pathway	KEGG_10.02.2016	0.0069	0.1	0.00044	0.0013	[-1]	Group2	4.16667	6	[Ccnd1, Ccnd3, Dvl2, Nfatc4, Plcb3, Ppp3cb]
GO:0004921	Oxytocin signaling pathway	KEGG_10.02.2016	0.00052	0.017	0.00044	0.0013	[-1]	Group2	5.06329	8	[Camkk1, Ccnd1, Gnas, Kcnj12, Mapk1, Nfatc4, Plcb3, Ppp3cb]
GO:0005166	HTLV-I infection	KEGG_10.02.2016	0.0016	0.039	0.00044	0.0013	[-1]	Group2	3.55872	10	[Akt1, Ccnd1, Ccnd3, Cdkn2a, Chek1, Dvl2, Nfatc4, Pdgfrb, Ppp3cb, Stat5b]
GO:0004022	cGMP-PKG signaling pathway	KEGG_10.02.2016	0.052	0.26	0.012	0.025	[-1]	Group3	2.90698	5	[Akt1, Mapk1, Nfatc4, Plcb3, Ppp3cb]
GO:0004724	Glutamatergic synapse	KEGG_10.02.2016	0.0022	0.052	0.012	0.025	[-1]	Group3	5.21739	6	[Gnas, Gng8, Homer2, Mapk1, Plcb3, Ppp3cb]
GO:0005010	Alzheimer's disease	KEGG_10.02.2016	0.017	0.14	0.012	0.025	[-1]	Group3	3.38983	6	[Mapk1, Ndufa5, Ndufv3, Plcb3, Ppp3cb, Sdhc]
GO:0005016	Huntington's disease	KEGG_10.02.2016	0.085	0.34	0.012	0.025	[-1]	Group3	2.51256	5	[Ndufa5, Ndufv3, Plcb3, Rcor1, Sdhc]
GO:0004022	cGMP-PKG signaling pathway	KEGG_10.02.2016	0.052	0.26	1.3e-06	6.7e-06	[-1]	Group4	2.90698	5	[Akt1, Mapk1, Nfatc4, Plcb3, Ppp3cb]
GO:0004062	Chemokine signaling pathway	KEGG_10.02.2016	0.029	0.17	1.3e-06	6.7e-06	[-1]	Group4	3.0303	6	[Akt1, Gng8, Mapk1, Plcb3, Pxn, Stat5b]
GO:0004068	FoxO signaling pathway	KEGG_10.02.2016	0.00098	0.028	1.3e-06	6.7e-06	[-1]	Group4	5.22388	7	[Akt1, Ccnb1, Ccnd1, Cdkn2d, Homer2, Igf1, Mapk1]
GO:0004072	Phospholipase D signaling pathway	KEGG_10.02.2016	0.0073	0.096	1.3e-06	6.7e-06	[-1]	Group4	4.10959	6	[Akt1, Gnas, Mapk1, Pdgfrb, Pip5k1b, Plcb3]
GO:0004110	Cell cycle	KEGG_10.02.2016	0.00065	0.02	1.3e-06	6.7e-06	[-1]	Group4	5.6	7	[Ccnb1, Ccnd1, Ccnd3, Cdkn2a, Cdkn2d, Chek1, Ywhaz]
GO:0004114	Oocyte meiosis	KEGG_10.02.2016	0.011	0.1	1.3e-06	6.7e-06	[-1]	Group4	4.31034	5	[Ccnb1, Igf1, Mapk1, Ppp3cb, Ywhaz]
GO:0004152	AMPK signaling pathway	KEGG_10.02.2016	0.004	0.077	1.3e-06	6.7e-06	[-1]	Group4	4.65116	6	[Akt1, Camkk1, Ccnd1, Cpt1b, Igf1, Rab2a]
GO:0004310	Wnt signaling pathway	KEGG_10.02.2016	0.0069	0.1	1.3e-06	6.7e-06	[-1]	Group4	4.16667	6	[Ccnd1, Ccnd3, Dvl2, Nfatc4, Plcb3, Ppp3cb]
GO:0004360	Axon guidance	KEGG_10.02.2016	0.00078	0.023	1.3e-06	6.7e-06	[-1]	Group4	5.42636	7	[Efna2, Ephb2, Mapk1, Nfatc4, Ppp3cb, Sema5b, Unc5a]
GO:0004510	Focal adhesion	KEGG_10.02.2016	0.0026	0.057	1.3e-06	6.7e-06	[-1]	Group4	3.94089	8	[Akt1, Ccnd1, Ccnd3, Igf1, Itga9, Mapk1, Pdgfrb, Pxn]
GO:0004550	Signaling pathways regulating pluripotency of stem cells	KEGG_10.02.2016	0.0012	0.033	1.3e-06	6.7e-06	[-1]	Group4	5	7	[Akt1, Dvl2, Fgfr1, Igf1, Inhbb, Mapk1, Tbx3]
GO:0004630	Jak-STAT signaling pathway	KEGG_10.02.2016	0.0028	0.059	1.3e-06	6.7e-06	[-1]	Group4	4.34783	7	[Akt1, Ccnd1, Ccnd3, Il11ra1, Socs1, Socs7, Stat5b]
GO:0004724	Glutamatergic synapse	KEGG_10.02.2016	0.0022	0.052	1.3e-06	6.7e-06	[-1]	Group4	5.21739	6	[Gnas, Gng8, Homer2, Mapk1, Plcb3, Ppp3cb]
GO:0004725	Cholinergic synapse	KEGG_10.02.2016	0.01	0.11	1.3e-06	6.7e-06	[-1]	Group4	4.42478	5	[Akt1, Gng8, Kcnj12, Mapk1, Plcb3]
GO:0004728	Dopaminergic synapse	KEGG_10.02.2016	0.021	0.14	1.3e-06	6.7e-06	[-1]	Group4	3.7037	5	[Akt1, Gnas, Gng8, Plcb3, Ppp3cb]
GO:0004917	Prolactin signaling pathway	KEGG_10.02.2016	0.00022	0.008	1.3e-06	6.7e-06	[-1]	Group4	8.10811	6	[Akt1, Ccnd1, Mapk1, Socs1, Socs7, Stat5b]
GO:0004921	Oxytocin signaling pathway	KEGG_10.02.2016	0.00052	0.017	1.3e-06	6.7e-06	[-1]	Group4	5.06329	8	[Camkk1, Ccnd1, Gnas, Kcnj12, Mapk1, Nfatc4, Plcb3, Ppp3cb]
GO:0004922	Glucagon signaling pathway	KEGG_10.02.2016	0.0012	0.033	1.3e-06	6.7e-06	[-1]	Group4	5.88235	6	[Akt1, Cpt1b, Gnas, Pgam2, Plcb3, Ppp3cb]
GO:0004933	AGE-RAGE signaling pathway in diabetic complications	KEGG_10.02.2016	0.0072	0.1	1.3e-06	6.7e-06	[-1]	Group4	4.85437	5	[Akt1, Ccnd1, Mapk1, Plcb3, Stat5b]
GO:0005010	Alzheimer's disease	KEGG_10.02.2016	0.017	0.14	1.3e-06	6.7e-06	[-1]	Group4	3.38983	6	[Mapk1, Ndufa5, Ndufv3, Plcb3, Ppp3cb, Sdhc]
GO:0005034	Alcoholism	KEGG_10.02.2016	0.092	0.27	1.3e-06	6.7e-06	[-1]	Group4	2.45098	5	[Camkk1, Gnas, Gng8, H2afy, Mapk1]
GO:0005161	Hepatitis B	KEGG_10.02.2016	0.0073	0.096	1.3e-06	6.7e-06	[-1]	Group4	4.10959	6	[Akt1, Ccnd1, Mapk1, Nfatc4, Stat5b, Ywhaz]
GO:0005203	Viral carcinogenesis	KEGG_10.02.2016	0.0059	0.1	1.3e-06	6.7e-06	[-1]	Group4	3.44828	8	[Ccnd1, Ccnd3, Cdkn2a, Chek1, Mapk1, Pxn, Stat5b, Ywhaz]
GO:0005205	Proteoglycans in cancer	KEGG_10.02.2016	0.01	0.1	1.3e-06	6.7e-06	[-1]	Group4	3.39806	7	[Akt1, Ccnd1, Fgfr1, Igf1, Mapk1, Pxn, Sdc1]
GO:0005214	Glioma	KEGG_10.02.2016	0.0001	0.0041	1.3e-06	6.7e-06	[-1]	Group4	9.23077	6	[Akt1, Ccnd1, Cdkn2a, Igf1, Mapk1, Pdgfrb]
GO:0005215	Prostate cancer	KEGG_10.02.2016	0.0006	0.019	1.3e-06	6.7e-06	[-1]	Group4	6.74157	6	[Akt1, Ccnd1, Fgfr1, Igf1, Mapk1, Pdgfrb]
GO:0005220	Chronic myeloid leukemia	KEGG_10.02.2016	0.0016	0.04	1.3e-06	6.7e-06	[-1]	Group4	6.84932	5	[Akt1, Ccnd1, Cdkn2a, Mapk1, Stat5b]
GO:0005230	Central carbon metabolism in cancer	KEGG_10.02.2016	0.001	0.029	1.3e-06	6.7e-06	[-1]	Group4	7.57576	5	[Akt1, Fgfr1, Mapk1, Pdgfrb, Pgam2]
GO:0005231	Choline metabolism in cancer	KEGG_10.02.2016	0.0066	0.1	1.3e-06	6.7e-06	[-1]	Group4	4.9505	5	[Akt1, Mapk1, Pcyt1b, Pdgfrb, Pip5k1b]

## Sheet: ZFTA-MAML2 GO
GOID	GOTerm	Ontology Source	Term PValue	Term PValue Corrected with Bonferroni step down	Group PValue	Group PValue Corrected with Bonferroni step down	GOLevels	GOGroups	% Associated Genes	Nr. Genes	Associated Genes Found
GO:0004010	MAPK signaling pathway	KEGG_10.02.2016	0.034	0.24	0.012	0.024	[-1]	Group1	2.75591	7	[Akt2, Fgf15, Fgf3, Fgfr1, Jund, Mapk1, Ppp3cb]
GO:0004014	Ras signaling pathway	KEGG_10.02.2016	0.022	0.28	0.012	0.024	[-1]	Group1	3.0303	7	[Akt2, Calm3, Fgf15, Fgf3, Fgfr1, Mapk1, Ptpn11]
GO:0004015	Rap1 signaling pathway	KEGG_10.02.2016	0.046	0.18	0.012	0.024	[-1]	Group1	2.7907	6	[Akt2, Calm3, Fgf15, Fgf3, Fgfr1, Mapk1]
GO:0004151	PI3K-Akt signaling pathway	KEGG_10.02.2016	0.0098	0.22	0.012	0.024	[-1]	Group1	2.85714	10	[Akt2, Ccnd1, Ccnd3, Cdkn1b, Fgf15, Fgf3, Fgfr1, Mapk1, Rbl2, Ywhaz]
GO:0004390	Hippo signaling pathway	KEGG_10.02.2016	0.011	0.23	0.012	0.024	[-1]	Group1	3.8961	6	[Bmp7, Ccnd1, Ccnd3, Gli2, Ppp1cb, Ywhaz]
GO:0004810	Regulation of actin cytoskeleton	KEGG_10.02.2016	0.0049	0.13	0.012	0.024	[-1]	Group1	3.66972	8	[Fgf15, Fgf3, Fgfr1, Mapk1, Pip5k1b, Ppp1cb, Pxn, Rdx]
GO:0005166	HTLV-I infection	KEGG_10.02.2016	0.084	0.16	0.012	0.024	[-1]	Group1	2.4911	7	[Akt2, Ccnd1, Ccnd3, Cdkn2a, Cdkn2c, Crebbp, Ppp3cb]
GO:0005200	Pathways in cancer	KEGG_10.02.2016	0.0087	0.2	0.012	0.024	[-1]	Group1	2.76382	11	[Akt2, Ccnd1, Cdkn1b, Cdkn2a, Crebbp, Fgf15, Fgf3, Fgfr1, Gli2, Gna11, Mapk1]
GO:0005218	Melanoma	KEGG_10.02.2016	2.4e-05	0.001	0.012	0.024	[-1]	Group1	9.72222	7	[Akt2, Ccnd1, Cdkn2a, Fgf15, Fgf3, Fgfr1, Mapk1]
GO:0000280	Valine, leucine and isoleucine degradation	KEGG_10.02.2016	0.00056	0.02	0.00056	0.0022	[-1]	Group0	8.92857	5	[Acaa2, Acat1, Bckdha, Bckdhb, Ivd]
GO:0004022	cGMP-PKG signaling pathway	KEGG_10.02.2016	0.0048	0.14	0.012	0.024	[-1]	Group1	4.06977	7	[Adra2c, Akt2, Calm3, Gna11, Mapk1, Ppp1cb, Ppp3cb]
GO:0004024	cAMP signaling pathway	KEGG_10.02.2016	0.033	0.26	0.012	0.024	[-1]	Group1	3.0303	6	[Akt2, Calm3, Camk2g, Crebbp, Mapk1, Ppp1cb]
GO:0004066	HIF-1 signaling pathway	KEGG_10.02.2016	0.01	0.23	0.012	0.024	[-1]	Group1	4.54545	5	[Akt2, Camk2g, Cdkn1b, Crebbp, Mapk1]
GO:0004068	FoxO signaling pathway	KEGG_10.02.2016	0.0011	0.041	0.012	0.024	[-1]	Group1	5.22388	7	[Akt2, Ccnd1, Cdkn1b, Crebbp, Homer2, Mapk1, Rbl2]
GO:0004072	Phospholipase D signaling pathway	KEGG_10.02.2016	0.032	0.29	0.012	0.024	[-1]	Group1	3.42466	5	[Agpat3, Akt2, Mapk1, Pip5k1b, Ptpn11]
GO:0004110	Cell cycle	KEGG_10.02.2016	0.00013	0.0052	0.012	0.024	[-1]	Group1	6.4	8	[Ccnd1, Ccnd3, Cdkn1b, Cdkn2a, Cdkn2c, Crebbp, Rbl2, Ywhaz]
GO:0004114	Oocyte meiosis	KEGG_10.02.2016	0.0028	0.093	0.012	0.024	[-1]	Group1	5.17241	6	[Calm3, Camk2g, Mapk1, Ppp1cb, Ppp3cb, Ywhaz]
GO:0004261	Adrenergic signaling in cardiomyocytes	KEGG_10.02.2016	0.037	0.18	0.012	0.024	[-1]	Group1	3.28947	5	[Akt2, Calm3, Camk2g, Mapk1, Ppp1cb]
GO:0004270	Vascular smooth muscle contraction	KEGG_10.02.2016	0.019	0.31	0.012	0.024	[-1]	Group1	3.90625	5	[Calm3, Gna11, Mapk1, Ppp1cb, Ptgir]
GO:0004310	Wnt signaling pathway	KEGG_10.02.2016	0.008	0.2	0.012	0.024	[-1]	Group1	4.16667	6	[Camk2g, Ccnd1, Ccnd3, Crebbp, Csnk2a1, Ppp3cb]
GO:0004380	Osteoclast differentiation	KEGG_10.02.2016	0.018	0.31	0.012	0.024	[-1]	Group1	3.96825	5	[Akt2, Jund, Mapk1, Ppp3cb, Socs1]
GO:0004510	Focal adhesion	KEGG_10.02.2016	0.037	0.22	0.012	0.024	[-1]	Group1	2.95567	6	[Akt2, Ccnd1, Ccnd3, Mapk1, Ppp1cb, Pxn]
GO:0004630	Jak-STAT signaling pathway	KEGG_10.02.2016	0.0033	0.1	0.012	0.024	[-1]	Group1	4.34783	7	[Akt2, Ccnd1, Ccnd3, Crebbp, Il11ra1, Ptpn11, Socs1]
GO:0004720	Long-term potentiation	KEGG_10.02.2016	0.00014	0.0054	0.012	0.024	[-1]	Group1	9.09091	6	[Calm3, Camk2g, Crebbp, Mapk1, Ppp1cb, Ppp3cb]
GO:0004722	Neurotrophin signaling pathway	KEGG_10.02.2016	0.016	0.29	0.012	0.024	[-1]	Group1	4.09836	5	[Akt2, Calm3, Camk2g, Mapk1, Ptpn11]
GO:0004725	Cholinergic synapse	KEGG_10.02.2016	0.012	0.24	0.012	0.024	[-1]	Group1	4.42478	5	[Akt2, Camk2g, Gna11, Kcnj12, Mapk1]
GO:0004728	Dopaminergic synapse	KEGG_10.02.2016	0.024	0.29	0.012	0.024	[-1]	Group1	3.7037	5	[Akt2, Calm3, Camk2g, Ppp1cb, Ppp3cb]
GO:0004910	Insulin signaling pathway	KEGG_10.02.2016	0.029	0.29	0.012	0.024	[-1]	Group1	3.52113	5	[Akt2, Calm3, Mapk1, Ppp1cb, Socs1]
GO:0004919	Thyroid hormone signaling pathway	KEGG_10.02.2016	0.013	0.26	0.012	0.024	[-1]	Group1	4.2735	5	[Akt2, Ccnd1, Crebbp, Mapk1, Slc16a2]
GO:0004921	Oxytocin signaling pathway	KEGG_10.02.2016	0.003	0.097	0.012	0.024	[-1]	Group1	4.43038	7	[Calm3, Camk2g, Ccnd1, Kcnj12, Mapk1, Ppp1cb, Ppp3cb]
GO:0004922	Glucagon signaling pathway	KEGG_10.02.2016	0.0079	0.21	0.012	0.024	[-1]	Group1	4.90196	5	[Akt2, Calm3, Camk2g, Crebbp, Ppp3cb]
GO:0005010	Alzheimer's disease	KEGG_10.02.2016	0.02	0.31	0.012	0.024	[-1]	Group1	3.38983	6	[Aph1b, Calm3, Mapk1, Ndufa4l2, Ppp3cb, Sdhc]
GO:0005152	Tuberculosis	KEGG_10.02.2016	0.021	0.3	0.012	0.024	[-1]	Group1	3.35196	6	[Akt2, Calm3, Camk2g, Crebbp, Mapk1, Ppp3cb]
GO:0005161	Hepatitis B	KEGG_10.02.2016	0.0086	0.21	0.012	0.024	[-1]	Group1	4.10959	6	[Akt2, Ccnd1, Cdkn1b, Crebbp, Mapk1, Ywhaz]
GO:0005162	Measles	KEGG_10.02.2016	0.027	0.29	0.012	0.024	[-1]	Group1	3.59712	5	[Akt2, Ccnd1, Ccnd3, Cdkn1b, Csnk2a1]
GO:0005169	Epstein-Barr virus infection	KEGG_10.02.2016	0.19	0.19	0.012	0.024	[-1]	Group1	2.29358	5	[Akt2, Cdkn1b, Crebbp, Csnk2a1, Ywhaz]
GO:0005203	Viral carcinogenesis	KEGG_10.02.2016	0.0019	0.067	0.012	0.024	[-1]	Group1	3.87931	9	[Ccnd1, Ccnd3, Cdkn1b, Cdkn2a, Crebbp, Mapk1, Pxn, Rbl2, Ywhaz]
GO:0005205	Proteoglycans in cancer	KEGG_10.02.2016	3.7e-05	0.0015	0.012	0.024	[-1]	Group1	5.33981	11	[Akt2, Camk2g, Ccnd1, Fgfr1, Mapk1, Nudt16l1, Ppp1cb, Ptpn11, Pxn, Rdx, Sdc1]
GO:0005214	Glioma	KEGG_10.02.2016	0.00012	0.0052	0.012	0.024	[-1]	Group1	9.23077	6	[Akt2, Calm3, Camk2g, Ccnd1, Cdkn2a, Mapk1]
GO:0005215	Prostate cancer	KEGG_10.02.2016	0.00071	0.025	0.012	0.024	[-1]	Group1	6.74157	6	[Akt2, Ccnd1, Cdkn1b, Crebbp, Fgfr1, Mapk1]
GO:0005220	Chronic myeloid leukemia	KEGG_10.02.2016	0.00024	0.0093	0.012	0.024	[-1]	Group1	8.21918	6	[Akt2, Ccnd1, Cdkn1b, Cdkn2a, Mapk1, Ptpn11]
GO:0004350	TGF-beta signaling pathway	KEGG_10.02.2016	0.0036	0.11	0.0036	0.011	[-1]	Group2	5.88235	5	[Bmp7, Crebbp, Inhbb, Mapk1, Smad6]
GO:0004068	FoxO signaling pathway	KEGG_10.02.2016	0.0011	0.041	0.068	0.068	[-1]	Group3	5.22388	7	[Akt2, Ccnd1, Cdkn1b, Crebbp, Homer2, Mapk1, Rbl2]
GO:0004110	Cell cycle	KEGG_10.02.2016	0.00013	0.0052	0.068	0.068	[-1]	Group3	6.4	8	[Ccnd1, Ccnd3, Cdkn1b, Cdkn2a, Cdkn2c, Crebbp, Rbl2, Ywhaz]
GO:0004151	PI3K-Akt signaling pathway	KEGG_10.02.2016	0.0098	0.22	0.068	0.068	[-1]	Group3	2.85714	10	[Akt2, Ccnd1, Ccnd3, Cdkn1b, Fgf15, Fgf3, Fgfr1, Mapk1, Rbl2, Ywhaz]
GO:0005161	Hepatitis B	KEGG_10.02.2016	0.0086	0.21	0.068	0.068	[-1]	Group3	4.10959	6	[Akt2, Ccnd1, Cdkn1b, Crebbp, Mapk1, Ywhaz]
GO:0005166	HTLV-I infection	KEGG_10.02.2016	0.084	0.16	0.068	0.068	[-1]	Group3	2.4911	7	[Akt2, Ccnd1, Ccnd3, Cdkn2a, Cdkn2c, Crebbp, Ppp3cb]
GO:0005203	Viral carcinogenesis	KEGG_10.02.2016	0.0019	0.067	0.068	0.068	[-1]	Group3	3.87931	9	[Ccnd1, Ccnd3, Cdkn1b, Cdkn2a, Crebbp, Mapk1, Pxn, Rbl2, Ywhaz]
GO:0005206	MicroRNAs in cancer	KEGG_10.02.2016	0.05	0.15	0.068	0.068	[-1]	Group3	2.53623	7	[Ccnd1, Cdkn1b, Cdkn2a, Crebbp, Rdx, Reck, Socs1]

## Sheet: Comb inter-species GO 
GOID	GOTerm	Ontology Source	Term PValue	Term PValue Corrected with Bonferroni step down	Group PValue	Group PValue Corrected with Bonferroni step down	GOLevels	GOGroups	% Associated Genes	Nr. Genes	Associated Genes Found
GO:0004390	Hippo signaling pathway	KEGG_10.02.2016	0.081	0.89	0.082	0.16	[-1]	Group0	3.24675	5	[CCND1, CCND3, FZD9, GLI2, LEF1]
GO:0005200	Pathways in cancer	KEGG_10.02.2016	0.0083	0.25	0.082	0.16	[-1]	Group0	3.27456	13	[AKT3, BAX, CASP3, CCND1, FGFR3, FZD9, GLI2, LEF1, PDGFRB, PLCB3, PRKACA, RAF1, XIAP]
GO:0004010	MAPK signaling pathway	KEGG_10.02.2016	0.0001	0.0044	0.0047	0.019	[-1]	Group2	5.09804	13	[AKT3, CACNA1H, CACNA2D2, CASP3, FGFR3, JUND, MAPK14, MAPK8IP1, PDGFRB, PPM1B, PPP3CB, PRKACA, RAF1]
GO:0004014	Ras signaling pathway	KEGG_10.02.2016	0.15	0.78	0.0047	0.019	[-1]	Group2	2.64317	6	[AKT3, EFNA2, FGFR3, PDGFRB, PRKACA, RAF1]
GO:0004015	Rap1 signaling pathway	KEGG_10.02.2016	0.013	0.38	0.0047	0.019	[-1]	Group2	3.79147	8	[AKT3, EFNA2, FGFR3, MAPK14, PDGFRB, PLCB3, RAF1, RAP1GAP]
GO:0004151	PI3K-Akt signaling pathway	KEGG_10.02.2016	0.35	0.35	0.0047	0.019	[-1]	Group2	2.05279	7	[AKT3, CCND1, CCND3, EFNA2, FGFR3, PDGFRB, RAF1]
GO:0004810	Regulation of actin cytoskeleton	KEGG_10.02.2016	0.25	0.51	0.0047	0.019	[-1]	Group2	2.33645	5	[DOCK1, FGFR3, IQGAP2, PDGFRB, RAF1]
GO:0005166	HTLV-I infection	KEGG_10.02.2016	0.0052	0.17	0.0047	0.019	[-1]	Group2	3.87597	10	[AKT3, ANAPC1, BAX, CCND1, CCND3, FZD9, PDGFRB, PPP3CB, PRKACA, XIAP]
GO:0005200	Pathways in cancer	KEGG_10.02.2016	0.0083	0.25	0.0047	0.019	[-1]	Group2	3.27456	13	[AKT3, BAX, CASP3, CCND1, FGFR3, FZD9, GLI2, LEF1, PDGFRB, PLCB3, PRKACA, RAF1, XIAP]
GO:0004310	Wnt signaling pathway	KEGG_10.02.2016	0.0012	0.049	0.082	0.16	[-1]	Group0	5.6338	8	[CCND1, CCND3, CSNK2A1, FZD9, LEF1, PLCB3, PPP3CB, PRKACA]
GO:0004360	Axon guidance	KEGG_10.02.2016	0.00061	0.024	0.00061	0.003	[-1]	Group1	6.29921	8	[CDK5, EFNA2, EPHB2, NTN1, PPP3CB, SEMA3F, SEMA5B, UNC5A]
GO:0004115	p53 signaling pathway	KEGG_10.02.2016	7.1e-05	0.003	0.0047	0.019	[-1]	Group2	10.1449	7	[BAX, CASP3, CCND1, CCND3, CD82, DDB2, GORAB]
GO:0004020	Calcium signaling pathway	KEGG_10.02.2016	0.19	0.78	0.082	0.16	[-1]	Group0	2.77778	5	[CACNA1H, PDGFRB, PLCB3, PPP3CB, PRKACA]
GO:0004022	cGMP-PKG signaling pathway	KEGG_10.02.2016	0.1	0.95	0.082	0.16	[-1]	Group0	2.99401	5	[ADRA2C, AKT3, PLCB3, PPP3CB, RAF1]
GO:0004062	Chemokine signaling pathway	KEGG_10.02.2016	0.2	0.62	0.082	0.16	[-1]	Group0	2.6738	5	[AKT3, CX3CL1, PLCB3, PRKACA, RAF1]
GO:0004261	Adrenergic signaling in cardiomyocytes	KEGG_10.02.2016	0.023	0.56	0.082	0.16	[-1]	Group0	4.05405	6	[AKT3, CACNA2D2, MAPK14, PLCB3, PRKACA, SCN5A]
GO:0004728	Dopaminergic synapse	KEGG_10.02.2016	0.044	0.75	0.082	0.16	[-1]	Group0	3.87597	5	[AKT3, MAPK14, PLCB3, PPP3CB, PRKACA]
GO:0004916	Melanogenesis	KEGG_10.02.2016	0.017	0.44	0.082	0.16	[-1]	Group0	5	5	[FZD9, LEF1, PLCB3, PRKACA, RAF1]
GO:0004919	Thyroid hormone signaling pathway	KEGG_10.02.2016	0.0084	0.25	0.082	0.16	[-1]	Group0	5.08475	6	[AKT3, CCND1, NOTCH1, PLCB3, PRKACA, RAF1]
GO:0004921	Oxytocin signaling pathway	KEGG_10.02.2016	0.031	0.72	0.082	0.16	[-1]	Group0	3.79747	6	[CACNA2D2, CCND1, PLCB3, PPP3CB, PRKACA, RAF1]
GO:0005166	HTLV-I infection	KEGG_10.02.2016	0.0052	0.17	0.082	0.16	[-1]	Group0	3.87597	10	[AKT3, ANAPC1, BAX, CCND1, CCND3, FZD9, PDGFRB, PPP3CB, PRKACA, XIAP]
GO:0004020	Calcium signaling pathway	KEGG_10.02.2016	0.19	0.78	0.0047	0.019	[-1]	Group2	2.77778	5	[CACNA1H, PDGFRB, PLCB3, PPP3CB, PRKACA]
GO:0004022	cGMP-PKG signaling pathway	KEGG_10.02.2016	0.1	0.95	0.0047	0.019	[-1]	Group2	2.99401	5	[ADRA2C, AKT3, PLCB3, PPP3CB, RAF1]
GO:0004062	Chemokine signaling pathway	KEGG_10.02.2016	0.2	0.62	0.0047	0.019	[-1]	Group2	2.6738	5	[AKT3, CX3CL1, PLCB3, PRKACA, RAF1]
GO:0004068	FoxO signaling pathway	KEGG_10.02.2016	0.015	0.41	0.0047	0.019	[-1]	Group2	4.47761	6	[AKT3, CCND1, CDKN2D, HOMER2, MAPK14, RAF1]
GO:0004071	Sphingolipid signaling pathway	KEGG_10.02.2016	0.034	0.68	0.0047	0.019	[-1]	Group2	4.16667	5	[AKT3, BAX, MAPK14, PLCB3, RAF1]
GO:0004210	Apoptosis	KEGG_10.02.2016	0.0016	0.063	0.0047	0.019	[-1]	Group2	7.05882	6	[AKT3, BAX, CASP3, PPP3CB, PRKACA, XIAP]
GO:0004261	Adrenergic signaling in cardiomyocytes	KEGG_10.02.2016	0.023	0.56	0.0047	0.019	[-1]	Group2	4.05405	6	[AKT3, CACNA2D2, MAPK14, PLCB3, PRKACA, SCN5A]
GO:0004310	Wnt signaling pathway	KEGG_10.02.2016	0.0012	0.049	0.0047	0.019	[-1]	Group2	5.6338	8	[CCND1, CCND3, CSNK2A1, FZD9, LEF1, PLCB3, PPP3CB, PRKACA]
GO:0004380	Osteoclast differentiation	KEGG_10.02.2016	0.046	0.75	0.0047	0.019	[-1]	Group2	3.81679	5	[AKT3, JUND, MAPK14, PPP3CB, SOCS1]
GO:0004510	Focal adhesion	KEGG_10.02.2016	0.032	0.7	0.0047	0.019	[-1]	Group2	3.46535	7	[AKT3, CCND1, CCND3, DOCK1, PDGFRB, RAF1, XIAP]
GO:0004550	Signaling pathways regulating pluripotency of stem cells	KEGG_10.02.2016	0.0053	0.17	0.0047	0.019	[-1]	Group2	4.92958	7	[AKT3, FGFR3, FZD9, INHBB, MAPK14, RAF1, TBX3]
GO:0004630	Jak-STAT signaling pathway	KEGG_10.02.2016	0.088	0.88	0.0047	0.019	[-1]	Group2	3.16456	5	[AKT3, CCND1, CCND3, RAF1, SOCS1]
GO:0004722	Neurotrophin signaling pathway	KEGG_10.02.2016	0.034	0.68	0.0047	0.019	[-1]	Group2	4.16667	5	[AKT3, ARHGDIA, BAX, MAPK14, RAF1]
GO:0004728	Dopaminergic synapse	KEGG_10.02.2016	0.044	0.75	0.0047	0.019	[-1]	Group2	3.87597	5	[AKT3, MAPK14, PLCB3, PPP3CB, PRKACA]
GO:0004910	Insulin signaling pathway	KEGG_10.02.2016	0.057	0.69	0.0047	0.019	[-1]	Group2	3.59712	5	[AKT3, PRKACA, RAF1, SOCS1, SREBF1]
GO:0004914	Progesterone-mediated oocyte maturation	KEGG_10.02.2016	0.0034	0.12	0.0047	0.019	[-1]	Group2	6.12245	6	[AKT3, ANAPC1, CPEB1, MAPK14, PRKACA, RAF1]
GO:0004916	Melanogenesis	KEGG_10.02.2016	0.017	0.44	0.0047	0.019	[-1]	Group2	5	5	[FZD9, LEF1, PLCB3, PRKACA, RAF1]
GO:0004917	Prolactin signaling pathway	KEGG_10.02.2016	0.0043	0.14	0.0047	0.019	[-1]	Group2	6.94444	5	[AKT3, CCND1, MAPK14, RAF1, SOCS1]
GO:0004919	Thyroid hormone signaling pathway	KEGG_10.02.2016	0.0084	0.25	0.0047	0.019	[-1]	Group2	5.08475	6	[AKT3, CCND1, NOTCH1, PLCB3, PRKACA, RAF1]
GO:0004921	Oxytocin signaling pathway	KEGG_10.02.2016	0.031	0.72	0.0047	0.019	[-1]	Group2	3.79747	6	[CACNA2D2, CCND1, PLCB3, PPP3CB, PRKACA, RAF1]
GO:0004933	AGE-RAGE signaling pathway in diabetic complications	KEGG_10.02.2016	0.0039	0.13	0.0047	0.019	[-1]	Group2	5.94059	6	[AKT3, BAX, CASP3, CCND1, MAPK14, PLCB3]
GO:0005145	Toxoplasmosis	KEGG_10.02.2016	0.032	0.67	0.0047	0.019	[-1]	Group2	4.23729	5	[AKT3, CASP3, MAPK14, SOCS1, XIAP]
GO:0005152	Tuberculosis	KEGG_10.02.2016	0.051	0.71	0.0047	0.019	[-1]	Group2	3.37079	6	[AKT3, BAX, CASP3, MAPK14, PPP3CB, RAF1]
GO:0005160	Hepatitis C	KEGG_10.02.2016	0.049	0.74	0.0047	0.019	[-1]	Group2	3.7594	5	[AKT3, CLDN10, EIF2AK2, MAPK14, RAF1]
GO:0005161	Hepatitis B	KEGG_10.02.2016	0.022	0.55	0.0047	0.019	[-1]	Group2	4.10959	6	[AKT3, BAX, CASP3, CCND1, DDB2, RAF1]
GO:0005162	Measles	KEGG_10.02.2016	0.053	0.69	0.0047	0.019	[-1]	Group2	3.67647	5	[AKT3, CCND1, CCND3, CSNK2A1, EIF2AK2]
GO:0005169	Epstein-Barr virus infection	KEGG_10.02.2016	0.12	0.89	0.0047	0.019	[-1]	Group2	2.9703	6	[AKT3, CSNK2A1, EIF2AK2, MAPK14, PRKACA, PSMD11]
GO:0005203	Viral carcinogenesis	KEGG_10.02.2016	0.13	0.78	0.0047	0.019	[-1]	Group2	2.92683	6	[BAX, CASP3, CCND1, CCND3, EIF2AK2, PRKACA]
GO:0005205	Proteoglycans in cancer	KEGG_10.02.2016	0.0033	0.12	0.0047	0.019	[-1]	Group2	4.4335	9	[AKT3, CASP3, CCND1, FZD9, MAPK14, NUDT16L1, PRKACA, RAF1, SDC1]
GO:0005206	MicroRNAs in cancer	KEGG_10.02.2016	0.044	0.79	0.0047	0.019	[-1]	Group2	3.0303	9	[ABCB1, CASP3, CCND1, DNMT3A, FGFR3, NOTCH1, PDGFRB, RAF1, SOCS1]
GO:0005210	Colorectal cancer	KEGG_10.02.2016	0.00031	0.012	0.0047	0.019	[-1]	Group2	9.67742	6	[AKT3, BAX, CASP3, CCND1, LEF1, RAF1]
GO:0005215	Prostate cancer	KEGG_10.02.2016	0.01	0.3	0.0047	0.019	[-1]	Group2	5.61798	5	[AKT3, CCND1, LEF1, PDGFRB, RAF1]
GO:0005010	Alzheimer's disease	KEGG_10.02.2016	0.1	0.86	0.1	0.1	[-1]	Group3	2.97619	5	[CASP3, CDK5, IDE, PLCB3, PPP3CB]
GO:0004110	Cell cycle	KEGG_10.02.2016	0.038	0.73	0.038	0.11	[-1]	Group4	4.03226	5	[ANAPC1, CCND1, CCND3, CDC7, CDKN2D]
