# Supplementary material for: Cross-Species Genomics Reveals Oncogenic Dependencies in ZFTA/C11orf95 Fusion–Positive Supratentorial Ependymomas
Source: Oxford University Press journal article supplement (doi:10.1158/2159-8290.cd-20-0963), 2021-04-20
Supplement: 21598290cd200963-sup-246541_2_supp_7049908_qr3hl5.xlsx [file 21598290cd200963-sup-246541_2_supp_7049908_qr3hl5.xlsx]

## Sheet: Sheet1
Antibodies	Manufacturer	Catalog number	Application and Dilution
HA-Tag (C29F4) Rabbit mAb	Cell Signaling	3724	IHC 1:500; IF 1:800; WB 1:1000
FLAG® M2 Mouse mAb	Sigma	F1804	WB 1:1000
β-Actin-HRP	abcam	ab49900	WB 1:10000
GLI2	Novus Biologicals	NB600-874	IHC 1:400
L1CAM	Sigma	L4543	IHC 1:100
p65	Cell Signaling	8242	IHC 1:400
NF-κB p65	abcam	ab7970	WB 1:1000
Anti-Rabbit-HRP	Cell Signaling	7074	WB 1:3000
Anti-Mouse-HRP	Cell Signaling	7076	WB 1:3000
Anti-Histone H3 antibodies	abcam	ab1791	WB 1:1000
Anti-Histone H3K27me3 antibodies	abcam	ab195477	WB 1:300
Acetyl-Histone H3 (Lys27) (D5E4) XP® Rabbit mAb	Cell Signaling	CST#8173	WB 1:300
Anti-Histone H3 (acetyl K27) antibody	abcam	ab4729	IHC 1:500
Anti-trimethyl-Histone H3 (Lys27) Antibody	Millipore	07-449	IHC 1:50
