# Supplementary material for: Cross-Species Genomics Reveals Oncogenic Dependencies in ZFTA/C11orf95 Fusion–Positive Supratentorial Ependymomas
Source: Oxford University Press journal article supplement (doi:10.1158/2159-8290.cd-20-0963), 2021-04-20
Supplement: 21598290cd200963-sup-246541_2_supp_7049910_qrchl6.xlsx [file 21598290cd200963-sup-246541_2_supp_7049910_qrchl6.xlsx]

## Sheet: Legend
Suppl. Table S3: Differentially expressed genes between clusters
Gene	Gene name
baseMean	Mean across samples
log2FoldChange	Log 2fold change variance between target group and others
pval	Main p-value
padj	Adjusted p-value (q-value)

## Sheet: ST-EPN-RELA
Gene	baseMean	log2FoldChange	pvalue	padj
TSPAN33	826.288	2.85004	1.25107e-20	9.63791e-17
GUCY1B2	1163.67	4.05755	1.12738e-20	9.63791e-17
LRWD1	602.138	1.47994	8.62979e-20	3.48399e-16
FN3K	1825.45	1.81194	1.6235e-19	5.618e-16
RELA	2848.94	1.89003	2.04003e-16	3.08848e-13
A4GALT	330.42	2.14649	4.45816e-16	6.35235e-13
IQCE	1853.84	1.12928	7.01154e-16	9.43558e-13
LPA	257.377	3.7046	1.06502e-15	1.35779e-12
CELSR3	2651.5	2.52775	4.98411e-15	5.03042e-12
KNDC1	2915.8	1.82449	8.94608e-15	8.66803e-12
RGL2	2341.44	1.19495	1.63861e-14	1.41757e-11
ARAP3	1453.25	1.87743	1.96009e-14	1.63722e-11
CROCC	6577.32	2.22977	2.16171e-14	1.74544e-11
RPS6KL1	226.382	1.95483	3.93139e-14	2.97594e-11
SREBF1	1746.2	1.23058	4.10517e-14	3.01332e-11
STRIP2	957.174	2.46278	4.55982e-14	3.2486e-11
DDR1	5716.33	1.18255	1.15801e-13	7.19243e-11
CELSR2	3950.86	1.38308	1.92291e-13	1.07893e-10
AGRN	5068.92	1.57933	5.13676e-13	2.43976e-10
AGPAT3	1214.48	0.962993	6.86506e-13	2.91741e-10
FBP2	1009.03	3.43665	8.79358e-13	3.61029e-10
NYAP1	233.003	1.53825	9.06756e-13	3.66073e-10
TPPP3	1055.74	2.50605	9.48365e-13	3.76594e-10
ECI1	514.52	0.95112	1.93149e-12	6.98306e-10
DTX3	693.495	0.84426	2.28765e-12	8.10823e-10
PRKACA	1607.99	0.984133	2.32887e-12	8.10823e-10
TAOK2	1201.75	0.717069	3.46494e-12	1.11908e-09
CHPF	515.967	1.58526	5.24177e-12	1.64898e-09
KCNA3	371.454	1.92641	6.52455e-12	1.97555e-09
CLDN5	455.3	1.71948	7.72071e-12	2.28072e-09
CASKIN1	593.221	1.57179	1.01666e-11	2.89724e-09
EZR	4625.52	1.45231	1.28772e-11	3.54458e-09
CNIH2	1399.96	1.56459	1.30761e-11	3.55889e-09
MCMBP	2338.98	1.01356	1.64881e-11	4.25249e-09
BRSK2	1091.15	1.8096	1.99041e-11	4.86331e-09
PFKL	5064.74	1.30364	2.66249e-11	6.09784e-09
REPIN1	805.615	1.19081	3.57121e-11	7.86413e-09
POU2F1	1843.8	1.06237	4.12602e-11	8.92362e-09
ZNF775	114.227	1.34769	4.817e-11	1.02353e-08
DNAJB2	1111.21	0.985305	5.19848e-11	1.07723e-08
HSD17B8	333.391	1.43545	5.20315e-11	1.07723e-08
MLLT1	1481.72	1.3363	5.91501e-11	1.20403e-08
ACOT7	1256.84	1.53434	6.49312e-11	1.29986e-08
RING1	706.882	0.746698	1.00645e-10	1.86548e-08
DPP7	1788.54	1.35804	1.04932e-10	1.92559e-08
HDAC4	6958.32	1.94716	1.14991e-10	2.06442e-08
PHF23	448.096	0.812929	1.38255e-10	2.44449e-08
CTBP1	1165.44	0.869437	1.40957e-10	2.45641e-08
CELSR1	3840.46	1.67432	1.56083e-10	2.67554e-08
RHOT2	1055.22	1.17124	2.00166e-10	3.32098e-08
LIMK1	1177.81	1.3146	2.0941e-10	3.45071e-08
L1CAM	15021.2	2.21074	2.42951e-10	3.91798e-08
CPEB1	82.7741	1.54725	2.59633e-10	4.08382e-08
AIF1L	442.523	2.04464	2.63042e-10	4.11075e-08
KCNQ2	2619.68	1.96375	4.12534e-10	6.20671e-08
MICALL2	3194.83	2.02602	4.55921e-10	6.69407e-08
ZNF385C	82.2408	1.87011	4.55981e-10	6.69407e-08
TIGD3	17.0526	1.95629	4.69382e-10	6.76777e-08
TRAF7	1812.28	0.968793	5.33383e-10	7.46829e-08
NES	12063.8	1.50624	5.62894e-10	7.79142e-08
RDH10	894.831	0.977207	5.99012e-10	8.15161e-08
DENND6B	851.838	1.10105	6.35476e-10	8.5473e-08
MBD6	1581.77	1.0031	6.57111e-10	8.74571e-08
MTA2	1610.2	0.955917	7.00864e-10	9.14285e-08
MTRNR2L1	30.3961	2.54373	7.02047e-10	9.14285e-08
KIF17	623.798	1.59397	7.06829e-10	9.15589e-08
MTOR	3398.04	0.602941	7.89638e-10	1.01203e-07
KIAA0232	3137.83	0.596523	8.42507e-10	1.06292e-07
EML3	835.416	0.974247	9.609e-10	1.16379e-07
HSF1	1352.2	1.01264	9.9104e-10	1.19433e-07
NSMF	5147.27	1.24757	1.09738e-09	1.3073e-07
LRRC42	546.359	0.984271	1.18602e-09	1.38787e-07
SH3BP2	2259.71	1.136	1.34845e-09	1.54804e-07
CCDC74A	561.447	1.20934	1.46123e-09	1.6463e-07
ATAD3C	599.866	2.55929	1.66141e-09	1.84607e-07
TRIP6	1012.22	1.50102	1.93023e-09	2.06885e-07
RNF208	124.287	1.63134	2.06047e-09	2.17951e-07
NRARP	42.864	1.8565	2.1786e-09	2.29444e-07
ZBTB22	321.389	0.783845	2.3165e-09	2.40827e-07
ELFN1	796.058	1.75958	2.46554e-09	2.55226e-07
TSC22D4	1226.93	1.11868	2.84237e-09	2.87923e-07
CCDC74B	484.891	1.18047	2.9389e-09	2.9081e-07
PDE8B	2680.63	1.10329	2.92757e-09	2.9081e-07
C10orf35	89.3464	1.437	3.38219e-09	3.26402e-07
MT3	497.619	2.00606	4.8689e-09	4.41721e-07
GIT1	1172.63	1.06494	5.0576e-09	4.52764e-07
WSB2	1001.29	0.756558	5.94405e-09	5.2741e-07
CSPG4	1627.82	1.43461	6.10833e-09	5.38044e-07
OSBPL2	866.727	0.608625	6.72683e-09	5.84029e-07
P2RY1	229.528	1.60364	6.81787e-09	5.89819e-07
PITPNM1	685.821	1.2484	7.2203e-09	6.15836e-07
ATP13A2	1628.43	0.999699	7.49416e-09	6.3172e-07
FAM118A	562.31	1.30602	7.43927e-09	6.3172e-07
GATM	1730.09	1.93054	8.95018e-09	7.4002e-07
KCNK18	30.2723	3.90702	9.83859e-09	8.07865e-07
FBXO31	1166.1	1.24585	1.07287e-08	8.6627e-07
CCM2	905.701	0.676429	1.09067e-08	8.77719e-07
KIF21B	2510.96	1.66954	1.20118e-08	9.50858e-07
CRYBA4	14.3276	4.73832	1.34875e-08	1.0438e-06
E4F1	408.098	1.09489	1.40528e-08	1.08064e-06
SLC9A3R1	519.195	1.63732	1.42423e-08	1.09174e-06
TREX1	391.048	1.21183	1.4629e-08	1.10392e-06
FAM155A	308.503	2.16032	1.45417e-08	1.10392e-06
OGFR	1187.28	0.985681	1.5237e-08	1.14268e-06
PNPLA2	1342.04	1.04919	1.60997e-08	1.19627e-06
TTBK1	364.899	1.34985	1.61986e-08	1.19993e-06
ADAMTSL4	9601.01	1.45862	1.71296e-08	1.25356e-06
MAPK3	854.581	0.808786	1.80577e-08	1.30962e-06
CA4	104.654	2.51386	1.803e-08	1.30962e-06
EML5	1978.66	1.05797	1.84844e-08	1.33258e-06
CADM3	770.155	1.54521	1.91269e-08	1.3667e-06
MAPK8IP1	10869.4	1.41779	1.96518e-08	1.40007e-06
ADAMTS19	1074.03	2.87744	2.177e-08	1.52409e-06
RUNDC3A	385.149	1.38946	2.75989e-08	1.84676e-06
DPYSL4	421.436	1.37287	2.83565e-08	1.8716e-06
OGDH	3112	0.897874	2.89514e-08	1.89538e-06
C22orf23	236.942	0.916706	2.96295e-08	1.92417e-06
NR2E1	663.728	2.28081	3.01171e-08	1.94467e-06
DGAT1	590.862	1.21191	3.01599e-08	1.94467e-06
AMZ1	72.4545	2.31401	3.12379e-08	2.00288e-06
CDK2AP1	1146.53	0.896881	3.23051e-08	2.06471e-06
SLC27A3	514.944	1.1373	3.32489e-08	2.10418e-06
SLC4A3	1597.92	1.27164	3.39677e-08	2.11516e-06
FLYWCH2	245.682	1.02046	3.51886e-08	2.17257e-06
TNPO2	2253.78	0.790167	3.637e-08	2.21912e-06
SCRN1	1801.3	0.839566	3.87132e-08	2.35616e-06
PNPLA6	1853.29	0.687387	4.02701e-08	2.44477e-06
PLXNB2	15542.7	1.06063	4.43119e-08	2.65685e-06
DDAH2	851.343	1.01208	4.4531e-08	2.66339e-06
RCOR2	2012.29	1.73813	5.05711e-08	2.96606e-06
SOX5	1693.19	1.13968	5.13512e-08	2.98985e-06
ADAR	13092.3	0.917115	5.52696e-08	3.18003e-06
PLEKHH3	350.651	1.16747	5.73259e-08	3.28275e-06
SMOX	415.453	0.795282	6.08216e-08	3.41828e-06
PLCB3	2688.83	1.69479	6.21338e-08	3.47591e-06
EFHD1	205.547	1.42408	6.7515e-08	3.70843e-06
PQLC2	194.048	0.980462	7.64875e-08	4.09902e-06
MPZ	146.87	1.74915	8.32576e-08	4.40338e-06
WDR90	1448.93	1.12664	9.10336e-08	4.76265e-06
HIP1	1414.13	0.865714	9.68152e-08	4.98026e-06
PIGQ	785.934	1.0948	9.63581e-08	4.98026e-06
PSD3	3332.81	0.912547	9.86789e-08	5.04282e-06
PALM	620.502	1.35513	1.01896e-07	5.16364e-06
DHX58	216.554	1.25045	1.08039e-07	5.41826e-06
GAS2L1	280.294	1.20638	1.08838e-07	5.44707e-06
COMT	542.633	0.708274	1.11821e-07	5.55051e-06
PRRT2	724.94	1.28121	1.13398e-07	5.61726e-06
CTC-454I21.3	28.6902	2.40786	1.21383e-07	5.93991e-06
CDK9	943.845	0.850432	1.23764e-07	6.0343e-06
GPC1	2273.26	1.37583	1.25191e-07	6.08934e-06
RPL36AP43	85.6506	1.74935	1.26967e-07	6.15105e-06
VEGFB	536.921	0.941424	1.28531e-07	6.20324e-06
EML2	754.836	1.03452	1.28813e-07	6.20324e-06
YIF1A	533.049	0.73569	1.32883e-07	6.36177e-06
PIEZO1	5858.6	1.73463	1.33155e-07	6.36177e-06
APC2	2110.6	1.50542	1.35164e-07	6.40719e-06
SREBF2	4789.03	0.867634	1.34591e-07	6.40719e-06
GSX2	31.4459	4.44088	1.38227e-07	6.52686e-06
ELAVL3	567.982	1.50647	1.46407e-07	6.83318e-06
BHLHE22	33.1637	3.90893	1.46852e-07	6.84074e-06
CENPB	489.431	0.979187	1.49735e-07	6.93504e-06
MAMDC4	6639.96	2.00756	1.53023e-07	7.06031e-06
MAP1B	27492.3	0.956356	1.54455e-07	7.11286e-06
HES4	1120.37	1.82695	1.60303e-07	7.34031e-06
OAF	158.9	2.02246	1.61552e-07	7.35578e-06
SHISA4	422.388	1.18947	1.66726e-07	7.50668e-06
RFX2	1165.32	1.02702	1.66537e-07	7.50668e-06
SELO	280.95	0.90812	1.67812e-07	7.54159e-06
NPDC1	420.528	1.01962	1.70131e-07	7.61753e-06
ZNF768	362.1	0.804362	1.69983e-07	7.61753e-06
ASIC3	153.721	1.15621	1.78572e-07	7.93677e-06
ANKRD9	31.151	1.47196	1.96418e-07	8.52658e-06
ZNFX1	1983.74	0.550147	2.00778e-07	8.63847e-06
USF1	474.565	0.641809	2.20385e-07	9.36561e-06
MYO7A	5619.7	2.28403	2.21978e-07	9.41678e-06
UNC119	619.388	1.23798	2.35189e-07	9.83935e-06
CTAGE14P	1183.88	2.06673	2.35925e-07	9.85311e-06
NACAD	677.255	1.23002	2.39224e-07	9.95659e-06
PACSIN3	356.364	1.34567	2.45729e-07	1.01923e-05
ZNRF3	708.819	0.827624	2.46673e-07	1.0214e-05
HMHA1	669.557	1.49685	2.68315e-07	1.09787e-05
CTD-2266L18.1	52.9254	1.47818	2.696e-07	1.10127e-05
KREMEN2	15.7899	2.22146	2.84418e-07	1.14795e-05
MTSS1L	8736.43	1.21481	2.83876e-07	1.14795e-05
ZNF691	261.152	0.712832	2.94501e-07	1.17718e-05
PCP4L1	1036.3	1.86482	3.08426e-07	1.22275e-05
PLD2	1903.09	1.11395	3.15681e-07	1.24337e-05
KIAA0319L	1410.59	0.460388	3.2274e-07	1.26706e-05
DDB1	5535.33	0.700622	3.24144e-07	1.27051e-05
EPPK1	9600.73	1.92042	3.44982e-07	1.32371e-05
FASN	8218.68	0.995382	3.57674e-07	1.3644e-05
LRFN4	174.37	1.24064	3.58471e-07	1.36529e-05
CTA-134P22.2	5.67316	2.19854	3.79424e-07	1.43606e-05
ELF4	524.459	0.798847	4.07396e-07	1.50432e-05
HIPK1	7225.8	0.801051	4.17612e-07	1.53736e-05
STON2	3040.59	1.00023	4.24625e-07	1.55844e-05
REXO1	996.008	0.866677	4.44821e-07	1.6106e-05
SMO	979.118	1.08139	4.55271e-07	1.64251e-05
TM7SF2	728.861	1.15057	4.5567e-07	1.64251e-05
MEGF8	1445.91	0.728478	4.61981e-07	1.65541e-05
FAM214B	94.1364	1.03423	4.65695e-07	1.66379e-05
SAMD1	248.446	0.719845	4.65275e-07	1.66379e-05
SRPK3	1745.12	1.75648	4.76493e-07	1.68744e-05
RUSC1	425.449	0.949621	4.77644e-07	1.68905e-05
ABCG2	1343.94	1.52117	4.99268e-07	1.75019e-05
AHCYL2	1734.74	0.975468	5.04376e-07	1.76045e-05
GRIK5	1540.85	0.930679	5.27241e-07	1.82448e-05
GABRA3	541.172	1.67871	5.33184e-07	1.82716e-05
FHDC1	739.713	1.49648	5.36005e-07	1.83385e-05
VPS9D1	343.161	0.914559	5.43007e-07	1.85293e-05
AKT1	2586.56	0.994198	5.62795e-07	1.90459e-05
CYP27C1	483.264	1.44336	5.79641e-07	1.9528e-05
MEPCE	459.003	0.481205	5.94943e-07	1.99326e-05
C9orf50	21.6284	1.96583	6.2187e-07	2.06068e-05
SALL2	961.657	0.951294	6.65856e-07	2.1708e-05
NUDT17	223.167	1.10758	6.6753e-07	2.17333e-05
BAIAP2-AS1	336.554	1.03336	6.69644e-07	2.17729e-05
CLEC3A	10.0089	4.24905	7.11243e-07	2.30019e-05
KIAA0556	2297.99	0.805314	7.40231e-07	2.36552e-05
HEATR5A	2173.01	0.908629	8.368e-07	2.61884e-05
DPYSL5	573.533	1.64401	8.60275e-07	2.66865e-05
OTOF	1081.86	2.21257	8.63779e-07	2.67336e-05
MID1IP1	115.475	1.02106	8.66112e-07	2.676e-05
XAB2	1405.57	1.6539	9.02609e-07	2.75509e-05
ROM1	179.649	1.16151	9.5168e-07	2.88517e-05
TULP4	988.447	0.440592	9.56308e-07	2.88836e-05
PROCR	159.203	1.15055	9.54264e-07	2.88836e-05
CHRNB1	347.886	1.28924	1.0221e-06	3.0453e-05
C20orf195	90.3679	1.83619	1.05165e-06	3.11801e-05
DIRAS1	63.6434	1.51683	1.07387e-06	3.17116e-05
MOV10	2419.17	0.781271	1.12982e-06	3.30128e-05
INPP5A	2261.82	1.10426	1.14337e-06	3.33285e-05
ARAP1	2476.32	0.849382	1.15843e-06	3.36458e-05
SLC4A2	835.111	0.804661	1.20392e-06	3.47587e-05
DAXX	410.315	0.476607	1.22426e-06	3.51925e-05
AIMP2	157.064	0.681498	1.23864e-06	3.55072e-05
SLC9A3	1454.83	2.25744	1.2934e-06	3.66979e-05
DPP3	305.261	0.733384	1.29381e-06	3.66979e-05
TSTA3	317.972	0.825587	1.30201e-06	3.68873e-05
GPR85	85.5171	1.50237	1.32852e-06	3.75066e-05
NUP210	884.625	0.826475	1.33301e-06	3.75896e-05
CIAO1	643.804	0.475561	1.35828e-06	3.80805e-05
NRXN2	2507.53	1.15057	1.46169e-06	4.03263e-05
PLG	255.897	1.84163	1.48039e-06	4.07371e-05
CHPF2	401.911	0.683135	1.48162e-06	4.07371e-05
RP11-598O12.1	87.1925	1.86823	1.52441e-06	4.15363e-05
MAPK12	300.476	1.53824	1.59086e-06	4.31044e-05
GPM6A	2906.11	1.3922	1.64687e-06	4.42755e-05
MFN2	2831.37	0.68923	1.6951e-06	4.51214e-05
KATNB1	780.034	0.76281	1.69441e-06	4.51214e-05
PPP1R9B	1185.95	0.810569	1.71918e-06	4.56491e-05
STK11IP	959.17	0.678352	1.82002e-06	4.79722e-05
GAREML	1133.37	1.41253	1.84073e-06	4.83077e-05
LCA10	119.007	1.88666	2.0749e-06	5.31292e-05
AKIRIN2	382.295	0.713833	2.09318e-06	5.34842e-05
MAPKAPK3	1334.51	1.13511	2.10542e-06	5.36838e-05
CCDC151	242.321	1.13784	2.11181e-06	5.379e-05
NUDT8	20.4787	1.45082	2.11442e-06	5.38001e-05
SRCAP	7282.72	0.521195	2.27936e-06	5.72446e-05
STAT5A	970.383	1.2641	2.32021e-06	5.79407e-05
B3GALT4	39.7366	1.06369	2.32666e-06	5.8042e-05
UBXN11	751.018	0.846899	2.35764e-06	5.85733e-05
MAPK11	148.909	1.33108	2.39602e-06	5.93443e-05
SLC25A29	1148.54	0.910262	2.45562e-06	6.06964e-05
SIX3	195.622	2.45088	2.57129e-06	6.285e-05
MAP4K2	1036.39	1.3387	2.575e-06	6.28774e-05
FAM131A	417.145	0.825616	2.58054e-06	6.29492e-05
NRCAM	3810.78	1.18313	2.59196e-06	6.31006e-05
PRDM11	464.929	1.05448	2.59165e-06	6.31006e-05
GPR98	69795	1.0742	2.63184e-06	6.40072e-05
ZNF696	55.7869	0.86786	2.72944e-06	6.59557e-05
PRRC2A	5420.93	0.49734	2.78292e-06	6.67433e-05
RUNDC1	350.882	0.5048	2.84316e-06	6.7986e-05
PARP10	421.252	1.18532	2.92416e-06	6.95112e-05
DNAJC4	263.135	0.806676	3.00011e-06	7.12467e-05
GRB14	370.702	1.55793	3.17682e-06	7.47108e-05
PTCH2	528.826	1.16695	3.25601e-06	7.63319e-05
AC017028.1	211.095	1.83966	3.29498e-06	7.70409e-05
GNB2	1443.51	0.655383	3.33328e-06	7.77449e-05
TP53I13	304.34	0.940467	3.35472e-06	7.8061e-05
SLC7A4	16.6314	1.87007	3.39892e-06	7.87114e-05
PPP1R16A	517.468	1.02389	3.45992e-06	7.97427e-05
DNER	2537.94	1.2965	3.48084e-06	8.00724e-05
LRRC41	801.949	0.386365	3.94186e-06	8.87137e-05
SETD1B	1070.28	0.595888	3.94438e-06	8.87137e-05
SCN8A	2462.93	1.1314	4.16688e-06	9.29413e-05
USP17L8	13.3557	3.87298	4.18868e-06	9.33418e-05
PTCHD2	676.605	1.51839	4.22524e-06	9.38112e-05
TECPR1	579.212	0.637217	4.29725e-06	9.52353e-05
POMGNT1	4625.79	0.834656	4.39284e-06	9.69196e-05
ASTN1	1793.73	1.19179	4.44016e-06	9.7422e-05
SCNN1D	245.058	1.20508	4.44942e-06	9.74488e-05
HDAC10	28.0996	1.30823	4.50871e-06	9.85372e-05
SLC38A10	827.963	0.55071	4.63637e-06	0.000100814
KTI12	17.2525	1.02586	4.71294e-06	0.000101839
GPR108	502.161	0.54575	4.72314e-06	0.000101969
NT5C	189.861	0.627494	4.8526e-06	0.000104114
ALDH5A1	912.062	0.689884	4.90949e-06	0.000105055
EFHD2	806.702	1.01361	4.94757e-06	0.000105497
CCDC106	323.788	0.826655	4.96247e-06	0.000105722
CLCN6	823.65	0.545297	5.11427e-06	0.000108384
GBP3	1685.28	1.22314	5.1021e-06	0.000108384
KIF21A	3790.42	1.23599	5.17824e-06	0.000109452
ANK2	16487.9	0.974173	5.31192e-06	0.000111693
MICALL1	497.23	0.688757	5.60348e-06	0.00011681
DMWD	596.431	0.720359	5.61188e-06	0.000116884
C19orf25	26.3498	1.01927	5.65735e-06	0.000117528
RHBDD2	628.392	0.673497	5.66802e-06	0.000117649
RFX4	2509.74	1.21365	6.01513e-06	0.000123793
CD151	515.721	0.783709	6.02505e-06	0.000123892
C3orf58	377.089	1.12119	6.07234e-06	0.000124547
GADD45GIP1	255.198	0.801175	6.19623e-06	0.000126553
ZDHHC1	283.296	0.79608	6.23839e-06	0.000127199
WDR24	370.292	0.874116	6.27054e-06	0.00012764
CASKIN2	929.098	1.14486	6.58772e-06	0.000132317
RP11-23J18.1	5.76387	2.37215	6.74739e-06	0.000135076
KDM4A	2242.86	0.59717	6.76449e-06	0.000135306
PSD2	3339.15	1.62393	6.92572e-06	0.000137849
ERBB2	2486.46	1.01137	6.96734e-06	0.000138326
FKBP9L	21.6029	1.85722	7.03175e-06	0.000139159
ABHD15	114.848	1.159	7.12461e-06	0.000140537
PTPRS	9314.46	0.900046	7.12325e-06	0.000140537
PHLPP1	1318.17	0.781044	7.249e-06	0.000142411
RHPN1	592.086	1.1753	7.39394e-06	0.000144906
C16orf3	107.149	1.08242	7.41995e-06	0.00014518
TMEM45B	25.9144	1.67729	7.53421e-06	0.000146705
KRTAP5-1	99.5009	1.83206	7.56246e-06	0.000147137
SLC2A4RG	343.183	0.910161	7.64424e-06	0.000148252
TBX10	11.2529	2.16105	7.71171e-06	0.000149203
DNAJC5	719.441	0.561406	7.71176e-06	0.000149203
ATAD2	1684.03	0.644185	7.74224e-06	0.000149673
TMEM8A	420.511	0.742731	7.9858e-06	0.000153159
MTRNR2L12	8.71271	1.80874	8.34342e-06	0.000158886
GNPTG	1249.25	0.557563	8.67405e-06	0.000163638
HELZ2	812.68	1.29827	8.77887e-06	0.00016427
XPR1	2282.6	0.737466	8.84519e-06	0.000164857
VARS	1017.3	0.663526	8.88641e-06	0.000165327
AC007560.1	43.2488	2.08714	8.9071e-06	0.000165585
ZC3H10	50.6505	0.704837	8.94542e-06	0.000166042
IRF9	48.877	1.19392	9.0608e-06	0.00016767
ARHGDIA	1904.88	0.73681	9.10588e-06	0.000168375
RP11-139K4.4	4.39247	2.60116	9.12751e-06	0.000168647
RAP1GAP	4552.18	1.23994	9.59298e-06	0.000175518
TMEM184B	615.161	0.701392	9.59361e-06	0.000175518
AMFR	2163.46	0.550005	9.63612e-06	0.000176163
TMEM140	48.3089	0.943478	9.81139e-06	0.000178558
PREX2	5628.04	0.876423	1.01125e-05	0.000183487
TPSG1	821.805	2.54482	1.0142e-05	0.000183747
CNTNAP1	1700.23	0.833203	1.01924e-05	0.000184325
MCRS1	402.862	0.596919	1.02166e-05	0.000184547
MYO3A	11994.9	1.24371	1.02464e-05	0.000184946
PPP6R2	1200.37	0.580551	1.02789e-05	0.000185257
ANKRD65	139.294	1.66882	1.03872e-05	0.000186929
IVD	2015.8	0.653021	1.04651e-05	0.000187915
TUFM	2148.37	0.595671	1.06135e-05	0.000189736
NRG1	554.376	2.05904	1.06425e-05	0.000189782
GAS8	558.687	0.773999	1.06696e-05	0.000189913
KCNH6	518.121	1.95283	1.06705e-05	0.000189913
LMO2	393.184	1.24019	1.0774e-05	0.000191053
DYNC1LI2	3176.45	0.564666	1.07849e-05	0.000191104
BSN	1295.36	1.34307	1.11564e-05	0.000196826
TRIM2	2450.29	0.812029	1.12867e-05	0.00019869
C9orf172	401.61	0.939884	1.20855e-05	0.000210912
NELFE	458.36	0.46717	1.21149e-05	0.000211274
KAT2A	1139.2	0.816568	1.22767e-05	0.000213942
AKR7A3	228.444	1.18662	1.23566e-05	0.000215025
PPP1R14BP3	60.2851	0.958031	1.23792e-05	0.000215149
RP11-368I7.4	53.7718	1.30731	1.26319e-05	0.000219185
MYO18A	1907.66	0.867116	1.28098e-05	0.000221955
WDR34	463.259	0.653771	1.30518e-05	0.000225666
COG4	2872.72	0.658964	1.3052e-05	0.000225666
PLXNC1	1326.58	0.833098	1.31093e-05	0.000226491
GFOD2	129.56	0.741788	1.36918e-05	0.000235051
ZNF444	52.1541	1.08796	1.40231e-05	0.00023955
C20orf112	762.667	0.875347	1.40138e-05	0.00023955
ANKRD53	228.817	0.993382	1.46411e-05	0.000247879
MAN2B2	524.949	0.660513	1.46437e-05	0.000247879
EDC4	1100.81	0.486703	1.4685e-05	0.000248403
TNRC6C-AS1	51.7477	1.85302	1.47937e-05	0.000249894
SALL1	3306.46	1.67907	1.50457e-05	0.000253444
ANGPTL6	746.388	1.93663	1.54318e-05	0.000259047
NDST1	4166.56	0.726649	1.55894e-05	0.000261511
SDHAP3	974.076	0.84897	1.57225e-05	0.000262514
C11orf84	1259.97	1.08622	1.57148e-05	0.000262514
EHBP1L1	1739.77	1.07231	1.5725e-05	0.000262514
RP11-114N19.2	7.58938	1.84003	1.5741e-05	0.000262599
ORAI3	17.4602	1.10181	1.59552e-05	0.000265442
GPR37L1	1311.72	1.6935	1.60599e-05	0.000266633
INTS5	179.925	0.629789	1.64469e-05	0.000271385
PRDX5	1896.17	0.998435	1.67063e-05	0.00027529
MYO5C	3727.8	0.848283	1.68639e-05	0.00027751
KLHL12	738.745	0.513286	1.69765e-05	0.000278983
WDR25	92.5702	0.595574	1.69737e-05	0.000278983
MTRNR2L6	3.68981	2.28492	1.7156e-05	0.00028098
RP11-289I10.2	7.55549	1.30015	1.80442e-05	0.000293346
TRIM41	1057.38	0.546613	1.82672e-05	0.000296573
GHDC	48.468	0.808941	1.88782e-05	0.000304249
KIF4A	654.56	1.17522	1.89821e-05	0.000305721
TMTC2	1509.27	1.30733	1.91448e-05	0.000307928
STOX2	864.858	1.12101	1.94151e-05	0.000310834
ATXN2L	2932.13	0.486859	1.95914e-05	0.000313037
IFI44L	1036.13	1.97459	2.01798e-05	0.000319312
TMEM63B	1007.85	0.52004	2.02013e-05	0.000319411
PEX11A	258.231	1.16814	2.02148e-05	0.000319415
ENKD1	181.702	0.854063	2.02547e-05	0.00031962
HCFC1	1804.01	0.578034	2.03869e-05	0.000321296
ADAP1	74.639	0.994577	2.04564e-05	0.000321973
CDC42SE1	619.159	0.416561	2.05339e-05	0.000322913
DNASE1L2	102.771	1.29226	2.06745e-05	0.000324415
ADCK4	871.826	0.630553	2.07076e-05	0.000324466
ZMYM3	1450.77	0.528625	2.07526e-05	0.000324946
MARK2	899.215	0.403241	2.08138e-05	0.000325692
CORO2B	1454.28	1.27715	2.10912e-05	0.00032876
NACC1	258.871	0.702379	2.17047e-05	0.000336589
SYT15	65.6262	1.19863	2.18344e-05	0.000337952
RN7SL546P	5.45488	2.39026	2.18589e-05	0.000338115
RHBDL1	93.768	1.55678	2.20525e-05	0.000340674
COQ9	1062.11	0.499554	2.23833e-05	0.000345125
RSPH3	641.497	0.643101	2.267e-05	0.000348879
LINGO4	3.32284	2.26052	2.27744e-05	0.00035004
RN7SL4P	5.05872	2.4088	2.29451e-05	0.000351995
FRAT1	11.895	1.36832	2.30028e-05	0.000352657
DOK7	120.517	1.37292	2.30759e-05	0.000353329
ORAI2	205.36	0.730661	2.34571e-05	0.000357809
FAM213A	700.527	0.586322	2.37352e-05	0.000361596
ZNF723	13.0476	2.2623	2.46421e-05	0.0003726
DHX16	699.094	0.441074	2.52059e-05	0.000379231
WNT7B	494.21	1.6754	2.59678e-05	0.000388282
DBIP1	3.1948	2.93901	2.7048e-05	0.000401945
NR2F6	175.338	0.994109	2.72311e-05	0.000403684
HEATR2	619.187	0.654517	2.78731e-05	0.000410688
BBS2	5629.34	0.65859	2.80207e-05	0.00041224
ADPRHL2	224.463	0.811807	2.8112e-05	0.000412701
U2AF2	562.8	0.489904	2.8095e-05	0.000412701
ZC3HAV1	897.85	0.564446	2.82864e-05	0.000414508
SUPT7L	812.557	0.434307	2.88794e-05	0.000421346
KIAA1737	459.003	0.669863	2.89749e-05	0.000422297
NEUROG2	97.262	2.14385	2.95105e-05	0.000428822
AC004987.9	22.8031	1.04725	2.9511e-05	0.000428822
DDAH1	674.164	1.14189	3.04616e-05	0.000439107
TP53BP1	7303.74	0.480583	3.04727e-05	0.000439107
UCKL1	767.024	0.822073	3.12329e-05	0.000448462
PAX6	3703.85	0.938763	3.13645e-05	0.000450084
C21orf33	586.565	0.522414	3.15471e-05	0.000452168
FZD9	16.2272	2.16258	3.17111e-05	0.000454156
ATP8A1	3503.3	1.07701	3.22387e-05	0.000460175
GLIS2	779.085	0.80475	3.23347e-05	0.000461274
MARCKS	683.679	0.694593	3.31883e-05	0.000471507
FGFRL1	1363.2	1.23962	3.34149e-05	0.000473894
OBSL1	3425.91	0.842641	3.35998e-05	0.000475958
TSHR	1395.91	1.12247	3.37036e-05	0.00047687
MARS	2050.6	0.424712	3.37392e-05	0.000477095
BRSK1	1219.07	0.703159	3.43229e-05	0.000483439
HYDIN	11139.8	0.96573	3.51888e-05	0.000492705
CYHR1	402.641	0.817377	3.57457e-05	0.000497912
RP11-638I8.1	48.3706	1.19713	3.60617e-05	0.000501736
ZNF687	585.131	0.564729	3.61665e-05	0.000502616
BAG6	1969.57	0.441835	3.64687e-05	0.000505656
PSMG3-AS1	34.1692	1.12648	3.65133e-05	0.000505985
NEURL4	868.804	0.545223	3.68471e-05	0.000509154
AAAS	2050.91	0.526333	3.72153e-05	0.000512488
ZHX1	1864.58	0.563403	3.72998e-05	0.000513359
FBRS	849.154	0.45087	3.74224e-05	0.000514464
TSPAN17	273.267	0.835316	3.76213e-05	0.000515734
HNRNPF	2164.94	0.541893	3.76203e-05	0.000515734
CROCCP2	300.827	0.843543	3.78388e-05	0.000518128
HHIPL1	278.641	1.57541	3.83612e-05	0.000523212
CTDNEP1	502.633	0.433261	3.86858e-05	0.000526452
MIIP	221.867	0.828412	3.92458e-05	0.000531982
ARHGEF26	995.112	0.780707	3.93159e-05	0.000532123
RP11-299L17.1	51.8017	1.55092	3.96234e-05	0.000535254
SHANK3	1671.9	0.712782	3.96419e-05	0.000535254
KRTAP5-AS1	4.55668	2.50929	3.97692e-05	0.000536375
ZNF786	319.753	0.763761	4.04525e-05	0.00054257
CCAR2	1394.18	0.413932	4.21733e-05	0.000561658
EXOSC6	19.3884	1.13884	4.21771e-05	0.000561658
CELF3	257.488	1.73755	4.23985e-05	0.000563986
TP73	1851.04	1.28127	4.28077e-05	0.00056787
SNX18	288.573	0.613273	4.35069e-05	0.000574826
TMEM198	94.6401	0.972832	4.3584e-05	0.000575019
PWWP2B	237.79	1.03058	4.381e-05	0.000577372
C19orf26	170.088	1.66462	4.37865e-05	0.000577372
CNPPD1	374.621	0.617913	4.53748e-05	0.000595403
MAVS	860.055	0.452342	4.55849e-05	0.000597512
ITPK1	733.897	0.90305	4.58218e-05	0.00059932
RAB37	50.2801	1.86185	4.633e-05	0.000604542
SMKR1	8.82838	1.59342	4.65175e-05	0.000605803
DYRK1B	468.275	0.686713	4.66304e-05	0.0006067
C17orf62	325.804	0.681409	4.68454e-05	0.000608763
STK36	2722.41	0.649645	4.74489e-05	0.000615616
WARS2-IT1	6.79226	1.94349	4.77413e-05	0.000618085
RN7SL181P	2.82527	2.37403	4.84645e-05	0.000625776
SMUG1	63.5544	0.558214	4.8666e-05	0.000627709
ZNF276	564.03	0.750486	4.87686e-05	0.000628363
PCSK4	170.003	1.11682	4.94548e-05	0.000635079
WSCD1	398.706	1.56997	4.96933e-05	0.000636552
MIR1286	16.584	1.78824	4.96763e-05	0.000636552
ZBTB48	494.465	0.686985	4.99841e-05	0.000639601
RP11-329A14.1	196.359	0.794038	5.03398e-05	0.000643133
TNFRSF25	1050.03	1.01092	5.08874e-05	0.00064876
TMC6	2623.48	1.51054	5.11723e-05	0.000651707
PC	651.191	1.07613	5.28217e-05	0.000667798
CHFR	755.823	0.459366	5.28037e-05	0.000667798
IFT140	2366.72	0.625854	5.3559e-05	0.000675005
MFSD10	598.214	0.630449	5.43623e-05	0.000683351
DISP2	252.91	1.27094	5.46273e-05	0.000686326
C2orf66	11.473	1.72764	5.47633e-05	0.000687103
TCF20	2530.31	0.582619	5.47195e-05	0.000687103
LYNX1	52.5753	1.00694	5.51604e-05	0.000691478
ZNF580	15.5339	1.18131	5.51801e-05	0.000691478
DCLK2	4717.15	0.797672	5.6799e-05	0.000707374
LRRC45	834.915	0.994169	5.69752e-05	0.000708476
EME2	246.736	1.23616	5.80573e-05	0.000718611
SLC6A8	5978.76	0.743248	5.89805e-05	0.000728178
C14orf79	328.24	0.622307	5.98356e-05	0.000735736
TRABD	265.847	0.790896	6.01064e-05	0.000737941
GRM3	497.485	1.50346	6.12643e-05	0.000751014
DOK1	157.613	0.934965	6.24142e-05	0.000761642
KBTBD12	380.465	1.41944	6.29941e-05	0.000767173
INSM1	8.93237	3.04726	6.30962e-05	0.000768029
ZC2HC1C	224.101	0.947968	6.3844e-05	0.000774796
PLA2G16	254.762	1.16181	6.40889e-05	0.000776966
ZNF213	126.139	0.719561	6.48422e-05	0.000783768
MANEAL	140.694	1.26282	6.63151e-05	0.000800642
DCXR	1793.41	0.830575	6.65401e-05	0.00080269
ZBTB20	1369.15	0.766928	6.93769e-05	0.000829885
RP11-429E11.3	7.80979	2.03163	7.00412e-05	0.000835767
MIRLET7C	22.8178	1.41994	7.14282e-05	0.000849389
NQO1	296.097	0.872378	7.16137e-05	0.000851177
EEF1A2	1539.11	1.61007	7.18123e-05	0.0008527
FBXL19	252.138	0.766597	7.1939e-05	0.000853787
PPIL1	231.824	0.540952	7.25379e-05	0.000859631
IL7	50.7106	0.884764	7.2804e-05	0.000860679
TUBG1P	123.314	0.835629	7.35703e-05	0.000868044
KIFC2	621.073	1.01732	7.48829e-05	0.000881813
VAV2	3401.96	0.832505	7.57387e-05	0.000890249
PFKFB2	1345.59	1.06687	7.59025e-05	0.000890788
BCL2L2	221.105	0.623106	7.6929e-05	0.000901524
GPC3	541.594	1.81565	7.69131e-05	0.000901524
CPT1A	1480.32	0.828539	7.72554e-05	0.000904474
SRRT	2699.95	0.622171	7.7765e-05	0.000909561
REC8	1048.67	0.707393	7.78503e-05	0.000909681
IFNL2	4.52867	3.89852	7.82647e-05	0.000912762
ITLN2	16.3696	2.6561	7.89943e-05	0.000920384
ABHD8	124.245	0.758881	7.97467e-05	0.000928258
LRPAP1	687.18	0.599207	7.98445e-05	0.000928285
ZSWIM8	1873.75	0.480221	8.08792e-05	0.000937835
ARSA	229.909	0.719935	8.11551e-05	0.000940134
BATF2	15.6412	1.47708	8.13817e-05	0.00094051
C19orf73	3.5013	1.98999	8.17212e-05	0.000943533
EPHA10	268.201	2.06328	8.1912e-05	0.000945048
PXN	852.469	0.615465	8.19304e-05	0.000945048
INTS1	7941.19	1.48751	8.19982e-05	0.000945379
PRDX1	2081.74	0.871669	8.3519e-05	0.000957899
CHRDL1	1931.14	1.36483	8.35124e-05	0.000957899
MTHFD1L	1260.62	0.606742	8.58977e-05	0.000981462
TSACC	5.91092	2.14722	8.63225e-05	0.000984012
TUBA3FP	6.48605	1.55082	8.63239e-05	0.000984012
B3GALT1	63.5305	1.50104	8.67027e-05	0.000986936
NARFL	172.502	0.498793	8.66588e-05	0.000986936
TRIM9	1450.05	1.25747	8.67643e-05	0.000987174
KRTAP5-8	17.1677	1.8789	8.70405e-05	0.000989851
MEIS2	1095.57	1.39402	8.79683e-05	0.000996613
GCHFR	13.9085	1.12357	8.84832e-05	0.00100028
AP5B1	24.0722	1.12667	8.88084e-05	0.00100289
ADSSL1	564.017	1.50769	8.99196e-05	0.00101007
CPSF7	1089.42	0.469072	9.03706e-05	0.00101298
SYT7	898.869	1.66018	9.09181e-05	0.00101723
AGAP3	942.99	0.615034	9.21725e-05	0.00102605
SLC2A6	106.169	1.31703	9.2151e-05	0.00102605
TTC34	14.7433	1.2444	9.24884e-05	0.00102815
ARMC5	93.3279	0.589621	9.33555e-05	0.00103542
MYO10	3332.51	0.763478	9.4645e-05	0.00104464
PAMR1	788.609	1.52593	9.46612e-05	0.00104464
ABCC6P1	15.1371	1.82461	9.54152e-05	0.00105104
ECE2	567.746	1.5114	9.65207e-05	0.00106211
DBNDD1	17.4934	1.04674	9.68387e-05	0.00106382
USP18	172.594	1.20723	9.72508e-05	0.0010669
RP11-687M24.4	9.63354	2.40745	9.77185e-05	0.00107057
CLCN2	855.142	0.711972	9.95716e-05	0.00108841
KIAA1024L	17.0238	2.69806	0.000100154	0.00109429
VPS52	842.556	0.323774	0.000100826	0.0010989
FOXG1	1486.17	1.80737	0.000102041	0.0011089
TUBGCP6	2190.45	0.647274	0.000102038	0.0011089
MAP3K14	373.582	0.790148	0.000103035	0.0011192
LYPLA2	532.501	0.658969	0.000103513	0.00112205
DLG4	1517.45	0.580548	0.000104567	0.00113194
CC2D1A	619.256	0.519908	0.000105666	0.0011407
TMEM179B	122.369	0.541812	0.000106685	0.00114957
RP11-296I10.6	366.728	0.81466	0.000107117	0.00115237
SOX21	187.233	2.08588	0.000107636	0.00115622
SLC5A10	9.67541	1.41765	0.000108505	0.00116349
CORO6	264.958	1.60598	0.000109178	0.00117019
KLHL25	647.332	0.668133	0.000109611	0.00117379
MTHFR	654.048	0.647506	0.000111556	0.00119103
HMGN2P8	37.9691	1.33775	0.000111682	0.00119175
CYC1	405.547	0.590177	0.00011369	0.00120892
ERAL1	559.628	0.452554	0.00011388	0.00120987
FAIM2	1671.84	1.31337	0.000114043	0.00121108
C19orf24	262.642	0.715242	0.000116784	0.00123585
ARHGAP39	555.905	0.703709	0.000117892	0.00124323
TMEM105	18.8186	2.68083	0.000117791	0.00124323
ADRM1	517.38	0.589187	0.00011786	0.00124323
CACNA1H	24564.4	1.89666	0.000118455	0.00124776
RP1-81D8.4	3.49429	2.80328	0.000120012	0.0012612
LYN	625.742	0.953603	0.000120645	0.00126675
SLC25A35	38.6112	1.08271	0.000122076	0.00127845
MX1	804.961	1.49886	0.000122305	0.00128029
FJX1	499.369	1.14789	0.000126769	0.00131396
DACT1	607.27	1.11802	0.000126763	0.00131396
PDLIM1	662.664	1.1118	0.000127442	0.0013198
ZFYVE26	3070.68	0.470542	0.000127749	0.00132242
KEAP1	330.827	0.528347	0.000128177	0.00132571
MYO9B	3330.89	0.584094	0.000129582	0.00133739
PACS2	1435.58	0.570154	0.000130082	0.00134161
ERBB4	3017.18	1.75962	0.000131018	0.00134934
KLHL42	679.656	0.529896	0.000131133	0.00134956
FOXA1	97.9091	3.93581	0.000132755	0.00136193
SWSAP1	15.4664	1.21844	0.000132803	0.00136193
CNGA3	298.484	1.7433	0.000132972	0.00136309
CBX4	513.704	1.00154	0.000133684	0.00136923
AGBL5	676.535	0.362504	0.000137866	0.0014008
C16orf93	46.6793	1.08769	0.000139613	0.00141504
VPS39	1841.46	0.322012	0.000140327	0.00141926
HPS1	951.043	0.609232	0.000141982	0.00143003
RNF224	13.448	1.73543	0.000143401	0.00143989
TAF6L	260.733	0.626357	0.000143542	0.00143989
KCNJ4	182.086	1.7349	0.000144295	0.00144432
SCAF1	632.64	0.476885	0.00014481	0.00144881
PPFIA3	249.406	1.01227	0.000145459	0.00145417
RP11-119H12.5	5.27274	1.44072	0.0001459	0.00145738
BMPR1B	1530.45	1.05369	0.000146752	0.00146287
SOX2	2554.48	1.29663	0.000148223	0.00147329
C1orf189	37.9587	1.34512	0.000148816	0.00147736
C10orf126	6.10284	2.42864	0.000148808	0.00147736
HIC1	62.5275	1.22205	0.000150258	0.00148924
PCAT7	1.93465	2.92831	0.000152479	0.00150539
SHISA6	62.2253	1.15248	0.000155713	0.00153016
PLXNA3	2941.3	0.815229	0.000156218	0.0015345
CAPN15	463.745	0.883274	0.000157695	0.00154587
C1orf122	105.973	0.661413	0.000158975	0.00155336
TUBGCP3	1093.74	0.572745	0.000159071	0.00155336
C22orf26	35.4869	0.940336	0.000159013	0.00155336
MTG2	302.027	0.63501	0.000160111	0.00156008
SLC25A1	440.364	0.64808	0.000160303	0.00156132
TMEM170B	130.029	1.02605	0.000161733	0.00157284
CDK2AP2	231.443	0.808028	0.000161767	0.00157284
RBM42	220.631	0.48914	0.000162937	0.00158253
CMTR1	1620.25	0.352272	0.000163915	0.00159089
CDK5	276.011	0.705259	0.000164232	0.00159128
SLC52A2	125.927	0.703029	0.000164198	0.00159128
ADORA2B	249.523	0.91135	0.000164299	0.00159129
RCBTB1	425.051	0.388406	0.00016538	0.00160048
FAM83H	816.239	1.00407	0.000165529	0.00160129
POU3F2	889.638	1.22625	0.000166828	0.00161199
AC087163.2	9.67107	1.2498	0.000169979	0.0016404
HNRNPA1P1	4.72542	2.11798	0.000170333	0.0016425
ANKMY1	1032.66	0.768643	0.000171703	0.00165243
ZMIZ1	4468.48	0.57083	0.000172311	0.00165762
BAHD1	251.565	1.00043	0.000173038	0.00166264
STAT5B	2249.09	0.570608	0.000175727	0.00168313
AC009274.6	4.99762	1.16212	0.000176347	0.00168706
COQ2	189.548	0.510558	0.000176654	0.00168867
SMLR1	8.73949	1.79293	0.000177128	0.00168983
ARPC1A	1029.82	0.438773	0.000177264	0.00168983
LRFN3	43.9236	0.669144	0.0001772	0.00168983
SLC7A11	938.958	1.05597	0.000178858	0.00170301
ELMO2	1543.74	0.488211	0.000180845	0.00171923
NRXN1	2926.29	1.74256	0.000181902	0.00172725
LINC00242	5.25993	2.02337	0.000183466	0.00173937
B9D2	57.5845	0.886999	0.000183989	0.00174297
PCNXL3	1184.2	0.505622	0.000186567	0.00176119
CRAT	320.372	0.577876	0.000187047	0.00176434
DARC	189.858	1.32292	0.000187265	0.00176502
FAM193A	1757.82	0.426318	0.000187887	0.00176882
EHD3	273.088	0.870226	0.000188812	0.00177513
RSPH9	326.648	0.757125	0.000190773	0.00179112
SSBP4	797.032	0.709859	0.000192202	0.00180314
GNB1	3053.83	0.448946	0.000192492	0.00180447
U52111.12	2.93611	2.47139	0.000193438	0.00181123
PLEKHG1	1754.54	0.581366	0.000194087	0.0018152
PLCH1	1115.2	0.878775	0.00019482	0.00182014
RP5-1039K5.17	2.78323	1.78984	0.00019497	0.00182064
GNG3	113.267	1.19426	0.000196858	0.00183474
FSTL3	91.8248	1.21528	0.000197017	0.00183481
KIAA0195	2165.69	0.475724	0.000197876	0.00184069
SBF1	1809.02	0.599232	0.000199281	0.00185305
C5orf49	198.199	1.24335	0.000201898	0.00187092
SLC17A3	2.77996	2.64144	0.000203363	0.00188091
LENG8	11033.2	0.734809	0.000203365	0.00188091
RP11-299L17.4	30.3159	1.27246	0.000203562	0.00188162
ZBTB4	576.289	0.533046	0.000203597	0.00188162
WDR17	2479.52	0.633184	0.000203947	0.00188414
DPPA3P2	2.56267	3.3967	0.000204139	0.0018852
ANAPC1	2018.86	0.472336	0.000206287	0.0019014
TARS2	682.361	0.448163	0.00020916	0.0019235
AP1B1	1432.11	0.576802	0.000209083	0.0019235
RP11-806K15.1	3.88266	2.0335	0.00021028	0.00193232
FLOT1	2064.53	0.483978	0.000210468	0.00193332
RIMKLA	43.4803	1.18897	0.000214671	0.00196299
TMSB4XP4	45.6305	1.06033	0.000215921	0.0019707
HES6	1010.59	1.72735	0.000219271	0.00199452
KIF5C	3279.02	0.987834	0.000221855	0.002015
HSPBP1	252.515	0.714474	0.000224452	0.00203401
COMMD5	44.2746	0.545608	0.000224783	0.00203624
PLEKHG5	6226.18	0.920399	0.000225929	0.00204587
CTNNA2	882.825	1.54178	0.000226251	0.00204801
SNX19	1320.08	0.328099	0.000227532	0.002055
ROGDI	194.97	0.923632	0.000227637	0.00205518
SLC25A39	606.399	0.511255	0.000228862	0.00206393
TLX1	52.3504	1.88558	0.000231538	0.00208651
SIRT7	251.453	0.718024	0.000234497	0.00211082
SKIV2L	932.684	0.410054	0.000237257	0.0021325
SCHIP1	42.9312	0.881128	0.000237934	0.00213779
WRAP73	345.673	0.611763	0.000238673	0.00214364
SALL3	388.591	1.97404	0.000240639	0.00215649
EPHB4	1828.7	0.934104	0.000240987	0.00215831
TSC2	6840.68	0.618799	0.00024102	0.00215831
EFNB2	365.273	0.879368	0.000243753	0.00217956
ANKRD35	122.844	1.05681	0.0002446	0.00218552
PEBP1P1	2.09659	2.33174	0.000250238	0.00222283
TMEM145	329.741	0.912562	0.000251104	0.00222883
LPCAT1	2817.07	1.12526	0.000255025	0.0022595
DDIT3	147.487	0.812674	0.00025536	0.00226164
RBMX2P3	37.0198	1.10849	0.000255456	0.00226166
OXLD1	13.3072	0.950946	0.000258008	0.00227843
LAMA5	7872.84	1.06929	0.000260147	0.00229313
ZAR1	12.5398	1.75917	0.000260427	0.00229477
RAB26	180.128	1.1455	0.000264652	0.00232439
C6orf118	616.322	1.22623	0.000265613	0.00232836
HMBS	427.011	0.461657	0.00026568	0.00232836
ABHD17C	169.832	0.852667	0.000266708	0.00233567
ACACA	5268.63	0.460508	0.000269533	0.00235786
TRIM26	338.811	0.539387	0.000271247	0.00237046
RP11-328P23.3	4.18832	3.89107	0.000272314	0.00237618
SLC9A3R2	171.173	0.862806	0.000277285	0.00241346
GPR137	216.126	0.775743	0.000277535	0.00241477
SNAI3	8.64352	1.26087	0.000277845	0.0024166
RP11-249L21.4	75.3456	0.875025	0.000278386	0.00241957
RTTN	2376.81	1.19125	0.000281197	0.00243788
ADAM15	739.185	0.72817	0.000284528	0.00246411
KCTD5	326.975	0.605555	0.000291825	0.00251472
TMEM219	404.061	0.454882	0.000295189	0.00253647
RP11-134K13.2	5.37634	1.47873	0.000297687	0.00254908
RNF123	1402.48	0.601927	0.000298201	0.00255241
SLC38A5	313.699	1.3746	0.000298848	0.00255704
RP11-1212A22.1	513.624	0.8217	0.000299195	0.00255911
RTN4R	456.2	1.04587	0.0003002	0.00256499
PDZD4	2121.83	0.74571	0.000300866	0.00256977
KIF5A	2480.3	0.832314	0.000303799	0.00259025
RNF11	590.043	0.420017	0.000306511	0.00261063
TRIM69	43.0853	0.94674	0.000308796	0.00262547
GLYR1	1403.95	0.380116	0.000309737	0.00263163
RARRES3	148.765	1.24999	0.000310951	0.00264009
GJC2	410.989	1.48322	0.000313077	0.00265163
IRF3	357.119	0.632902	0.000313841	0.00265718
IMPDH1	2586.03	0.914414	0.000316785	0.00267742
CEP68	1348.67	0.719375	0.000317843	0.00268237
CTD-2228K2.5	108.492	1.42223	0.000318036	0.00268237
CDH15	53.3514	2.07237	0.000318008	0.00268237
ZFPM1	368.511	0.900575	0.000319128	0.00268971
TMEM179	15.2324	1.81458	0.000319623	0.00269295
TRMT61A	124.172	0.782571	0.000320054	0.00269471
RP11-271K11.1	2.84495	2.12931	0.000320384	0.00269561
TTC40	4411.83	1.20787	0.000324954	0.0027246
CRYBB1	7.53455	1.77425	0.000327212	0.00273967
MIDN	1077.42	0.809446	0.000334438	0.00278772
RPUSD1	43.8761	0.657099	0.000336275	0.00279917
ZNF589	939.228	0.73427	0.000337392	0.00280365
SYNRG	2752.77	0.269975	0.000339066	0.0028137
GALE	255.838	0.545243	0.000342278	0.0028355
RP4-682C21.2	120.237	0.6389	0.000343985	0.00284672
LYPLA2P1	3.05732	1.60527	0.000346374	0.00286258
SYT3	23.796	1.56557	0.000347285	0.00286619
GPATCH3	190.289	0.472592	0.00034784	0.00286882
SLC1A3	10380.9	0.973823	0.0003481	0.00286999
SAMD14	359.509	1.03647	0.0003504	0.00288502
SH3RF1	394.407	0.601983	0.000350895	0.00288811
HERC2P5	28.9442	1.26467	0.000352971	0.00290225
PBX2	587.493	0.42318	0.000353447	0.00290462
EXOSC4	74.3349	0.602722	0.000354169	0.00290913
MAP3K11	282.829	0.822992	0.000355703	0.00291876
DGCR2	477.106	0.547368	0.000356321	0.00292149
UBR5	11329.6	0.440948	0.000356843	0.00292415
NMBR	10.0205	1.29951	0.000369329	0.00301221
CALB1	534.299	1.83525	0.000370432	0.00301917
FAM50B	24.1829	0.872675	0.00037479	0.00304445
TBC1D10B	542.158	0.527704	0.000377189	0.00305778
SAP130	887.154	0.367543	0.000387161	0.00312597
PHF2	1187.59	0.436775	0.000387278	0.00312597
KCNA2	499.074	1.1095	0.000391582	0.00315501
GNA12	399.86	0.573657	0.000392022	0.0031569
AMOTL2	1039.72	0.846651	0.000392687	0.0031591
ANKRD54	205.149	0.726474	0.000394866	0.00317137
DPP9	1213.81	0.740059	0.000396726	0.00318208
TPRN	215.696	0.988504	0.000398034	0.00319046
ADD1	3448.6	0.29431	0.000398344	0.00319189
STK25	738.883	0.496945	0.000400154	0.00320322
UBE2H	1133.87	0.366193	0.000400406	0.00320355
VPS11	832.26	0.37965	0.00040046	0.00320355
RIMS3	66.4862	0.872053	0.000407699	0.00325393
NADSYN1	912.833	0.540526	0.00041012	0.00327218
RPL7L1P8	4.22769	1.69269	0.000416993	0.00332045
RP11-274B21.4	879.564	0.733226	0.000418198	0.00332677
FAM212B	237.319	1.01225	0.000421292	0.00334808
LY6H	675.819	1.05465	0.000421674	0.00335002
RAC3	430.275	1.08636	0.000423153	0.00335847
NTN1	647.148	0.822784	0.000423903	0.00336222
POLR1C	688.45	0.477557	0.000424741	0.00336776
TUBG2	809.123	0.602091	0.000426203	0.00337383
PDZK1IP1	8.32295	2.36287	0.000426611	0.00337596
SLC45A1	165.843	0.573505	0.000428372	0.00338581
SLC4A11	1127.43	1.49103	0.000432696	0.00341296
SLC6A11	972.542	1.29419	0.000434301	0.00342116
UBE3B	1129.44	0.271853	0.000435153	0.00342565
MBL1P	3.79814	1.92917	0.000441799	0.00347345
SYNGR2	213.755	0.618387	0.000442666	0.00347638
TAOK3	1353.57	0.537625	0.000449509	0.00352345
VAC14	662.307	0.349168	0.000454202	0.00355213
EPHB2	2718.27	0.989865	0.000458282	0.00357865
ADAMTSL5	7.53225	1.27705	0.00045881	0.00358162
HDC	643.47	1.86211	0.000461858	0.00360077
GDPGP1	78.5393	0.839393	0.000465575	0.00362322
CTB-70D19.1	5.38663	2.16138	0.000467103	0.00362998
ZNF513	725.898	0.552306	0.000468432	0.00363661
RP11-382M14.1	6.22179	1.99314	0.000472392	0.00366168
GLI2	1425.77	0.903867	0.000472968	0.0036638
C2orf72	464.162	1.39894	0.000472954	0.0036638
LRRC4B	406.15	1.05354	0.000473178	0.00366426
NRIP1	1153.74	0.516518	0.000474066	0.00366879
CCT7P2	2.66167	3.02698	0.000476618	0.00368383
PNMA2	447.116	0.690774	0.000478014	0.00369344
SYNGAP1	5114.39	0.618371	0.000484811	0.00372931
NADK	422.13	0.475937	0.000488377	0.00374636
PTPRZ1	11855.2	1.35299	0.00048842	0.00374636
ARFGAP2	967.733	0.48062	0.00049142	0.00376341
PRRT4	8.08111	2.36355	0.000494183	0.00378075
SUGP2	3210.59	0.431145	0.00049601	0.00378898
AP2A2	1988.56	0.424716	0.000496346	0.00378961
RP11-29H23.6	23.5824	1.18598	0.000499055	0.00380623
PKMYT1	26.8677	1.25533	0.000501652	0.00382484
CEP170B	918.815	0.598551	0.000502132	0.0038273
CASC10	202.413	1.0102	0.000507443	0.00385806
RHBG	33.4397	1.84711	0.000510692	0.00387668
B3GAT3	233.091	0.616679	0.000514715	0.00390233
CDH4	509.822	1.20618	0.00051934	0.0039337
EBF4	546.905	1.00775	0.000523762	0.00396145
AC074389.6	66.7878	1.42366	0.000528316	0.00398922
CARD10	42.4696	1.00243	0.000530256	0.00400262
NCOA5	691.165	0.356313	0.000530649	0.00400433
MYPOP	9.10383	1.02958	0.000530843	0.00400455
SETD1A	911.114	0.379018	0.00053198	0.0040096
FAM171B	1806.01	0.666901	0.000536839	0.00404098
ADRBK1	1107.42	0.485466	0.000537947	0.00404679
VWFP1	2.57452	1.96938	0.00053794	0.00404679
GIGYF1	1428.26	0.596803	0.000552873	0.00414108
PRKD2	802.936	0.463574	0.000554964	0.00415289
C1orf233	12.469	1.53813	0.000561074	0.00418955
GDI1	4254.13	0.514392	0.000562274	0.00419721
SMPD2	339.683	0.649512	0.000562865	0.00420033
SULT1A1	458.02	0.880601	0.000567485	0.00423322
FAM188B	75.7259	0.719255	0.000572838	0.00426556
GUK1	587.381	0.555873	0.000573114	0.0042663
MUC12	95.975	1.65511	0.000580178	0.00430697
RP11-303E16.8	4.03138	1.60835	0.000584191	0.00433362
MED1	2114.71	0.287501	0.000584304	0.00433362
ZBED4	124.891	0.585671	0.000589888	0.00436168
LTBP3	11284.8	0.83338	0.000591454	0.00437059
BRINP2	470.136	1.53498	0.000593913	0.00438475
ZNF142	627.887	0.422547	0.000597046	0.00440385
RNFT2	278.331	0.656889	0.000599488	0.00441917
FIBP	807.629	0.541748	0.000604807	0.00445567
ACYP1	281.245	0.529017	0.000606416	0.00446481
LMNB2	1781.4	0.647189	0.00060696	0.0044661
PANX2	25.319	1.31027	0.000609082	0.00447899
UBA7	576.876	0.678072	0.000619449	0.00454144
C7orf49	72.1915	0.539884	0.00062242	0.00456184
LRRC37A4P	3424.51	0.961171	0.000629832	0.00461058
WDTC1	915.324	0.36785	0.000631051	0.00461458
MAP6	1365.05	0.770923	0.000630594	0.00461458
CPSF4	327.606	0.470035	0.000637944	0.0046587
AKR7A2	1290.08	0.53417	0.000638278	0.00465973
AMPD1	4.77557	2.55781	0.000640093	0.00466988
RP11-150O12.3	11.4992	2.00807	0.000640496	0.0046703
ABCB8	364.979	0.558448	0.00064239	0.0046827
LPAL2	143.908	1.26942	0.000646092	0.00470543
C17orf74	10.7184	1.88942	0.000648048	0.00471685
TNPO3	1970.91	0.374028	0.000653569	0.00475132
BLOC1S3	6.26983	1.22472	0.000657574	0.00477264
PPP1R1B	1364.84	1.84882	0.000659669	0.00478145
GBX1	64.8698	2.02062	0.000662433	0.00479704
MADD	2121.16	0.422575	0.000663135	0.00479926
SSBP3	3475.9	0.590816	0.000669224	0.00483899
REEP6	69.8273	1.0592	0.000670475	0.0048437
HLA-E	3090.34	0.860839	0.000671729	0.00485131
ANKRD13B	807.093	0.965109	0.000674177	0.00486609
CCDC88B	261.927	1.03915	0.000679146	0.00489695
PA2G4P4	52.2169	0.989835	0.000681213	0.00490956
IRF7	162.217	0.765268	0.000684019	0.00492392
VPS13C	15572.1	0.441859	0.000685815	0.00493245
ZKSCAN5	656.453	0.38921	0.000696508	0.00500045
RNPEPL1	269.536	0.622974	0.000698434	0.00501131
COL18A1	16606.1	1.12387	0.00070308	0.00504017
CD1D	7.70564	1.92905	0.000707418	0.00506227
SDCBP2	19.7129	1.08177	0.000711382	0.00508463
RP11-343N15.1	2.15348	2.09699	0.000711762	0.00508585
MIR551A	30.2012	1.22045	0.000712703	0.00508956
MIR920	76.9484	1.0391	0.000713678	0.00509202
RP11-314N2.2	3.98739	3.01941	0.000718477	0.00512138
PPP2R5B	571.951	0.533177	0.000720356	0.00513211
PYCR2	157.566	0.675485	0.000721692	0.00513832
SLC6A3	865.889	2.56175	0.000724514	0.00515113
ACAP3	765.254	0.701283	0.000725527	0.0051556
SLC3A2	1331.52	0.465405	0.000730548	0.00518338
RRN3P2	1014.69	0.960594	0.000736968	0.00521671
ZNF48	155.863	0.630052	0.000739025	0.00522821
RNF103	911.745	0.433436	0.000744796	0.00525676
PKD1	18814.6	0.75788	0.000746548	0.00526759
ALDH7A1P1	116.893	0.865755	0.000754467	0.00530954
SLC41A1	2016.72	0.705386	0.000754863	0.00531079
RBM23	1045.41	0.303298	0.000760338	0.00533519
PAOX	149.993	0.67143	0.00076187	0.00534147
MIR325	19.829	1.27688	0.000762549	0.0053425
MAFG	16.5345	1.17564	0.000771479	0.00537926
CCR10	5.56226	1.34463	0.000796521	0.00550946
UPF1	1492.1	0.405991	0.000801529	0.00553777
APEH	1306.28	0.565599	0.000803139	0.00554731
MTA1	2045.14	0.534857	0.000808008	0.0055704
USP30	508.479	0.382614	0.00080936	0.00557756
PTN	1324.02	0.930772	0.000810759	0.00558403
TELO2	495.195	0.494422	0.000813558	0.00560012
TECTA	602.487	0.633458	0.000814263	0.00560178
DLEC1	572.135	1.38237	0.00082007	0.00563054
RP11-700P18.1	12.1221	1.1573	0.000835537	0.00572538
RPS2P32	12.5376	0.90939	0.000837094	0.00573443
MGRN1	1217.15	0.465724	0.000841721	0.00576123
METRNL	162.38	0.794104	0.000845932	0.00577735
PCYT1B	385.735	0.696931	0.000846927	0.00578216
CROCCP1	1.65163	1.94744	0.000854319	0.00582606
GLDC	1118.29	1.34654	0.000854805	0.0058261
CPSF2	1468.95	0.382081	0.000856676	0.00583556
NHLH1	3.35234	2.40452	0.000860608	0.00584467
PBX2P1	5.73091	0.813874	0.000859599	0.00584467
C6orf62	1598.44	0.372274	0.000859753	0.00584467
ST3GAL3	684.633	0.424959	0.00086183	0.00584766
CLDN3	11.4323	1.42928	0.000862932	0.00585349
CCDC24	471.364	0.640289	0.000866225	0.00587254
ENC1	755.814	1.0307	0.00087392	0.00591808
SMCR8	574.806	0.404422	0.000875126	0.00592293
KCND3	1103.22	1.0733	0.000878077	0.00593959
GBA2	1450.32	0.429891	0.000884524	0.0059755
NFIX	7279.42	0.594275	0.000887074	0.0059871
PIANP	222.813	1.02595	0.00089206	0.00601737
PNMA1	303.072	0.515291	0.000893381	0.0060246
DUSP16	661.446	0.405751	0.000895476	0.00603386
CCDC135	417.397	1.13982	0.00089666	0.00603999
NEUROG3	1.66825	2.44869	0.000903228	0.00607578
BTBD6	461.578	0.552478	0.000906769	0.00609452
PON2	4891.42	0.670463	0.00090844	0.00610406
YAP1P1	2.41593	1.7639	0.000911201	0.00612091
MRPS34	112.771	0.550457	0.000913052	0.00612759
SLC47A1	284.152	1.14826	0.000914722	0.00613436
CYFIP2	1963.16	0.570518	0.000916593	0.00614181
HAGH	369.05	0.461344	0.000918802	0.00614928
EEF1DP1	4.51126	1.20833	0.000918844	0.00614928
NAPRT1	152.956	1.11779	0.000927816	0.00619986
AC006355.3	53.0438	0.775104	0.000932638	0.00622422
ACP2	198.652	0.49783	0.000933004	0.00622422
LLGL1	1293.34	0.591411	0.000935758	0.00623916
GTF3C1	3393.98	0.319029	0.000936797	0.00624265
GRIK1	426.347	1.22409	0.000937449	0.00624483
TLR9	2.20326	2.27023	0.000941096	0.00626268
IBA57	54.8009	0.863905	0.000944786	0.00627778
NUDT6	37.9059	0.663066	0.000946618	0.00628562
RP11-534L20.4	2.5326	1.90048	0.00094789	0.00629061
MFSD7	31.9191	1.12096	0.00094967	0.00629897
DNAL4	37.7393	0.602177	0.000954791	0.00633121
DCAF7	848.294	0.295991	0.000960593	0.0063662
JUND	3469.33	0.799585	0.000966157	0.00640132
ADRA2C	70.7346	1.50859	0.000966435	0.00640141
EFCAB4A	109.782	1.10206	0.000967272	0.0064052
NOXA1	87.4656	0.906203	0.000974081	0.00644794
MPC1	177.623	0.558168	0.000977204	0.00646225
FAM182A	22.6512	1.47759	0.00098468	0.00650603
MLC1	5264.22	1.26282	0.000991758	0.00654053
JMJD8	204.626	0.483808	0.000992063	0.00654076
HMGA1P8	49.7689	1.03373	0.000994321	0.00655207
PRR12	1529.34	0.460361	0.000995251	0.00655562
FCHSD1	459.681	0.793461	0.000998419	0.00657015
HEPACAM	2600.8	1.28005	0.00100712	0.00661842
IFI6	582.357	1.54596	0.00100776	0.00661927
ADCK5	197.564	1.08522	0.0010091	0.00662605
TKTL2	2.12256	2.71338	0.00102814	0.00673282
CHD1L	1333.32	0.448093	0.00102877	0.00673512
ACOX3	579.399	0.325848	0.00103217	0.00674098
TMEM178B	129.748	1.02308	0.00103199	0.00674098
SEC14L6	35.6296	1.2649	0.00103275	0.00674296
C11orf95	343.372	0.901762	0.00103413	0.00674829
RP11-923I11.7	108.012	1.12923	0.00103562	0.00675624
CRIP2	1007.78	0.706882	0.00103684	0.00676235
LGALS3BP	559.066	0.70566	0.00103859	0.00677197
GPR39	12.3882	2.06473	0.00104245	0.00679531
TTLL10	438.732	2.04861	0.00105048	0.00684396
ALPL	234.874	1.26154	0.00106027	0.00690027
ESPNL	27.3803	2.47399	0.00106093	0.00690271
BRD8	2460.24	0.467321	0.00106563	0.00692589
SH2B1	646.594	0.419794	0.00106806	0.00693611
RP11-33B1.2	42.1522	0.836048	0.00107214	0.00695811
VARS2	821.434	0.47124	0.00107649	0.00698051
GRIN3B	111.777	1.44285	0.00107663	0.00698051
MAD2L2	316.615	0.582093	0.00110211	0.00712666
FAM120C	842.941	0.497329	0.00110211	0.00712666
OTUD5	586.336	0.312115	0.00110354	0.00712827
HAS3	36.55	0.898523	0.00110773	0.00714583
SCAP	1745.99	0.39225	0.00111583	0.00719038
ABCA2	4262.47	0.610751	0.00111764	0.00719634
DOCK3	1697.54	0.759334	0.00112006	0.00720997
MSANTD1	20.9969	0.91148	0.00112528	0.00723975
ILVBL	776.001	0.674458	0.00113049	0.00726692
CSNK1E	1359.75	0.469562	0.001131	0.00726692
P4HTM	717.189	0.540615	0.0011425	0.00732912
ABCF2	790.914	0.369575	0.00114436	0.00733328
PBXIP1	2469.02	0.774168	0.00114946	0.00735819
RP11-259G18.2	11.8803	1.29261	0.00115398	0.00738128
USP24	6030.83	0.410117	0.00115744	0.00739623
PRKXP1	34.7024	1.12104	0.00115754	0.00739623
HDAC1P1	12.6093	1.56586	0.00116223	0.00741836
SLC12A7	7499.74	0.979905	0.00116624	0.00744002
CDO1	472.294	0.55974	0.0011837	0.00752959
RP3-334F4.1	3.34933	2.24955	0.00118677	0.00754321
MTTP	244.829	1.25295	0.00118755	0.00754618
NUDT22	136.857	0.836533	0.00118971	0.00755793
NKX6-2	79.2282	1.34748	0.00119688	0.00759746
ZC3HC1	217.288	0.406694	0.0011994	0.00761027
NKX2-4	9.36489	5.50609	0.00121709	0.00770306
OPRL1	34.7446	1.25276	0.00121733	0.00770306
TRIM8	622.428	0.445443	0.00121846	0.00770629
MZF1	399.455	0.602825	0.00122003	0.00770878
EHMT2	1207.76	0.502162	0.00122825	0.00775517
CAPN5	471.172	0.683108	0.00124945	0.0078632
PTTG3P	52.0921	0.900842	0.0012505	0.00786773
FAM43B	16.0985	1.46681	0.00125825	0.00790919
VSIG10	262.992	0.830978	0.00127733	0.00799919
VPS13D	9652.53	0.354866	0.00128224	0.00802578
CTC-308K20.1	15.979	0.729148	0.00128319	0.00802966
FASTK	199.575	0.596282	0.00128923	0.00805492
TRIP12	6883.59	0.29903	0.00129016	0.00805868
TTC16	25.3911	1.15914	0.00129215	0.00806901
TRIB2	667.474	0.626281	0.00129299	0.00807219
DNAJA3	411.064	0.328413	0.00131326	0.00818185
PARD6A	61.5576	0.893282	0.00132494	0.00823645
L3MBTL2	364.901	0.377987	0.00133687	0.00829698
AARS	6717.17	0.514278	0.00134182	0.00831912
ZDHHC8	982.103	0.769028	0.00134461	0.0083322
TAF6	540.678	0.35562	0.00134668	0.00833838
LZTS2	330.542	0.583408	0.00134813	0.00834331
RP11-54O7.10	28.4818	1.0516	0.0013545	0.00837419
ZNF76	546.427	0.387718	0.00135626	0.00838081
MEIS3P1	86.3706	0.82396	0.00136048	0.00840255
RP11-37J13.1	54.5146	1.42512	0.00136361	0.00841762
NEURL1B	44.8215	0.888089	0.00136454	0.00842122
MLST8	267.75	0.612427	0.0013704	0.0084509
WDR91	1190.59	0.742534	0.00137944	0.00849368
ARNT2	2015.58	0.807043	0.00138082	0.00850001
ZNRF2P1	6.8855	1.18349	0.00138375	0.00850942
RP11-465B22.3	9.03151	1.50345	0.00138523	0.00851419
ACOX1	2915.64	0.400081	0.00139157	0.00855097
CNRIP1	169.113	0.68922	0.00139278	0.00855626
SRA1	269.314	0.431984	0.00140103	0.00859439
PSME1	1191.81	0.57715	0.00140749	0.00862256
LMX1B	560.077	1.46229	0.00141844	0.0086765
CHST10	443.028	0.710219	0.00142095	0.00868772
PPM1G	1184.49	0.42326	0.00143504	0.00874932
MTA3	1741.28	0.379898	0.00144584	0.0088107
TYMP	709.864	0.895302	0.00144813	0.00882022
DDX49	938.025	0.632347	0.00145786	0.00886387
CTD-2547E10.3	3.82186	2.25024	0.00146523	0.00888415
AC006547.14	49.4875	0.881896	0.00146734	0.00889473
ZBED1	774.771	0.48976	0.00148047	0.00895193
POP5	191.227	0.496882	0.00148194	0.00895858
TRDN	18.8369	1.78814	0.0014843	0.00896835
PKIA	188.035	0.808433	0.0014937	0.00901393
ANKRD63	7.6448	2.15288	0.00149432	0.00901393
CMIP	3007.78	0.521697	0.00149445	0.00901393
PDLIM1P1	1.90904	1.77698	0.00150295	0.00905402
MTRNR2L8	44.6388	1.02223	0.00150495	0.00905926
NIN	5797.22	0.680408	0.00151352	0.0091018
AURKAIP1	140.74	0.504101	0.00151585	0.00911354
CFI	974.592	1.35356	0.00151822	0.00912554
GBA	1501.55	0.497837	0.00152181	0.00914032
GRAMD4	922.768	0.539195	0.00152246	0.00914195
MAP7D1	574.888	0.418065	0.00153619	0.00920773
BRI3BP	60.7136	0.591238	0.00154285	0.009228
ESYT1	2828.07	0.413914	0.00155021	0.00926719
PPP1R14B	762.95	0.887757	0.00155068	0.00926772
RNF5	451.21	0.405524	0.00156313	0.00932145
EPN2	797.34	0.405309	0.00156721	0.00934115
TXNRD1	2278.1	0.612478	0.0015739	0.00937483
MEX3D	225.292	0.755952	0.0015738	0.00937483
WARS	702.715	0.571143	0.00157683	0.00938236
ACSF3	1101.95	0.535908	0.00157658	0.00938236
CPSF3L	847.79	0.410675	0.00157928	0.00939001
OR13C4	2.40155	1.95733	0.00159445	0.00946859
RARA	458.923	0.500479	0.00160515	0.00951901
AC016716.1	70.8888	1.34046	0.00160671	0.00952271
RP11-88H9.2	9.16036	1.3255	0.00164627	0.00970968
LYL1	22.7251	0.897318	0.00166061	0.00978017
LRRTM4	451.174	1.27467	0.00167116	0.00982536
EIF4G1	9502.45	0.437001	0.00167565	0.00984582
SLC39A7	1017.41	0.440734	0.00168104	0.00986193
ZDHHC24	54.4516	0.658555	0.00172706	0.0100733
RP5-996D20.3	4.33527	1.34627	0.00173023	0.0100894
RGS19	19.3216	0.897412	0.00174124	0.0101438
COPS6	701.321	0.359313	0.0017469	0.0101662
PHF12	1221.27	0.335965	0.00174802	0.0101662
NXT1	101.097	0.473597	0.00175707	0.0102088
VPS33A	38.2456	0.60031	0.00177651	0.0103072
C19orf66	185.47	0.76268	0.00177597	0.0103072
PTK6	28.5856	1.04633	0.0017833	0.0103349
PCDH10	476.571	1.31569	0.00179638	0.0104025
PGAM5	24.2729	0.631319	0.00179878	0.010409
FHAD1	1187.61	0.944979	0.00179927	0.0104093
ACBD4	280.849	0.585925	0.00181024	0.0104646
C14orf142	49.3118	0.602737	0.00181592	0.0104881
PUF60	1094.2	0.474572	0.0018196	0.0105069
SLC7A6OS	119.895	0.380351	0.00182387	0.010524
AC073869.20	3.6307	1.37052	0.00182577	0.0105274
MAN2C1	1958.38	0.483216	0.00183249	0.0105561
AC093323.3	8.16897	1.08903	0.0018459	0.0106182
MAP3K10	290.03	0.525719	0.00184713	0.0106228
PTPMT1	25.2151	0.662992	0.0018524	0.0106455
CDHR2	46.6327	1.2045	0.00185757	0.0106651
CARKD	349.616	0.438729	0.00186106	0.01068
TRAM2	456.383	0.478298	0.0018712	0.0107255
PLEKHM2	1063.2	0.375835	0.00188975	0.0108084
KRT18P59	1.60426	1.81869	0.00189197	0.0108164
ERVK13-1	24.6265	0.863765	0.00189804	0.0108434
GRB10	2045.71	0.615429	0.00190153	0.0108583
MRPL27	284.312	0.348456	0.00191516	0.0109155
GPX4	1052.57	0.490551	0.00192164	0.0109473
EPB41L4B	628.94	0.973066	0.00192549	0.0109667
IGLC3	70.3256	2.06077	0.00193932	0.0110376
GAPDHP71	3.85159	2.11274	0.00194435	0.0110559
MORN3	85.5915	0.789483	0.00194781	0.0110729
SYS1-DBNDD2	6.37379	1.12033	0.00196986	0.0111695
VAX1	21.3428	2.94988	0.00197257	0.011177
ANP32C	72.3886	1.45996	0.00197724	0.0111956
ZNF646	360.171	0.508123	0.00197697	0.0111956
AQP6	23.7173	1.32838	0.00198681	0.0112393
OAZ1	1281.78	0.375642	0.00199254	0.0112659
RN7SL3	17.8633	1.29363	0.00199789	0.0112861
ZNF608	2523.56	0.451761	0.00201334	0.0113623
ESAM	231.645	0.664469	0.00201565	0.0113679
GAK	1074.55	0.32832	0.00201782	0.0113748
RP11-958N24.1	589.769	0.655496	0.0020233	0.0113977
POLDIP3	1075.97	0.375736	0.00203098	0.0114277
USP22	3104.31	0.380608	0.00203157	0.0114284
TKT	2084.79	0.810488	0.00203755	0.0114514
MIR338	12.2758	1.36966	0.00204765	0.0114949
FAM47E-STBD1	3.40373	1.44775	0.0020549	0.0115222
ANO8	789.958	0.718939	0.00206298	0.0115595
LGALS1	1326.29	0.83079	0.00206508	0.0115686
SAP30	522.97	0.441609	0.0020673	0.0115756
POM121L8P	2.28662	3.1778	0.00206706	0.0115756
VWA1	330.665	1.00269	0.00207465	0.0116102
PATZ1	383.614	0.48688	0.00207491	0.0116102
KIF1C	1420.74	0.384322	0.00208529	0.0116575
RABL2B	571.709	0.585342	0.0020903	0.0116774
C11orf48	60.2011	0.662139	0.00209806	0.01171
TMEM199	85.9033	0.444045	0.00209974	0.011714
CRMP1	493.38	0.921859	0.00211571	0.0118003
TNFAIP1	302.003	0.33538	0.00212812	0.0118532
GPR19	62.0909	1.10284	0.0021317	0.0118676
RFX5	1354.48	0.425561	0.00213346	0.011872
DOC2B	797.408	1.09146	0.00215473	0.0119629
C11orf94	15.808	0.938475	0.00215741	0.0119723
ZNF729	16.3152	1.76817	0.00217838	0.012061
NR1H3	188.569	0.721663	0.00218118	0.0120737
TLR10	9.18797	1.2198	0.00218259	0.0120788
ZBTB18	1153.31	0.693894	0.00220999	0.0122026
C2orf81	91.2881	0.730593	0.00221454	0.0122143
KCNH2	334.407	1.02054	0.00221589	0.0122154
PEX16	360.456	0.373448	0.0022158	0.0122154
NME3	100.253	0.858706	0.00222728	0.0122645
CXCL6	13.236	2.02591	0.00222796	0.0122654
ZFAT	221.007	0.280128	0.00223428	0.0122946
FAM78A	35.2962	0.773189	0.00224648	0.0123505
CTB-25B13.12	3.26873	1.11523	0.00226531	0.0124343
FDPSP7	3.04495	1.55575	0.00227766	0.0124795
POLR2C	877.612	0.403223	0.00228331	0.0124934
ARID1A	6080.31	0.414532	0.00229122	0.0125254
CSPG5	1137.12	1.11497	0.00229173	0.0125254
ST7	476.594	0.39014	0.00231577	0.0126255
CDK10	828.276	0.47714	0.00232843	0.0126802
GDF11	175.886	0.597197	0.0023366	0.0127104
UBXN1	450.845	0.396027	0.00234711	0.0127533
TNFSF4	16.0242	0.847971	0.00236864	0.0128472
DYNLL1P1	11.0771	1.34391	0.00237044	0.0128512
C6orf47	99.8729	0.50149	0.00237788	0.0128771
PLA2G6	942.257	0.531157	0.00237911	0.0128809
MIR941-3	8.74308	1.3043	0.00239591	0.0129516
AGO1	1141.63	0.411785	0.00241966	0.0130509
CDK5R1	374.551	0.968804	0.00242916	0.0130875
RP11-334E6.2	6.54383	1.17091	0.00245564	0.0132126
IFT172	3239.06	0.378459	0.00247117	0.0132732
NEU4	17.1138	1.25843	0.00248301	0.0133243
SDF4	696.296	0.577251	0.00249267	0.0133673
GRIPAP1	1145.48	0.418698	0.00249612	0.0133828
RALGAPA2	2509.85	0.471103	0.00249759	0.0133877
IRAK1	695.089	0.404774	0.00250544	0.0134239
SCG5	235.448	0.891367	0.00250965	0.0134435
TXLNA	637.268	0.335306	0.00251982	0.013489
ERN2	5.80944	2.06173	0.0025196	0.013489
NLRX1	322.156	0.547551	0.00252273	0.0134986
VASH1	668.858	0.710023	0.00252746	0.0135179
PKIG	313.546	0.628075	0.00252708	0.0135179
ZNF652P1	8.37561	1.19642	0.00253674	0.0135586
CASP16	23.2503	0.851867	0.00255789	0.0136506
TBC1D20	368.603	0.336747	0.00256845	0.0136897
SLC44A2	4912.44	0.440391	0.00257437	0.0137123
RP11-179A18.1	4.10861	1.72323	0.00257879	0.0137288
PRSS35	133.468	1.65094	0.00257941	0.0137291
BAIAP3	2971.16	1.35474	0.0025867	0.0137528
DNALI1	911.69	0.729397	0.0025914	0.0137747
DIS3L	988.892	0.338684	0.00259271	0.0137787
PHLDA3	91.7724	0.968036	0.00263213	0.0139484
CSTF2T	964.725	0.453627	0.00264592	0.0140123
SF1	3294.93	0.415192	0.00265044	0.0140301
FCN2	6.6084	1.64553	0.00267704	0.0141523
IL20RA	438.019	1.06609	0.00267861	0.0141575
TRADD	94.517	0.883253	0.00268859	0.0141917
PLIN1	205.392	1.12839	0.00270242	0.0142585
FAM162B	6.05905	1.19537	0.00273608	0.0143984
AC084082.3	1.63169	1.61703	0.00274204	0.0144204
GPR64	662.411	1.30991	0.00274295	0.0144221
RP11-332P22.2	1.48603	2.55395	0.00274386	0.0144237
APBB3	655.569	0.512846	0.00274589	0.014425
LRRC47	472.453	0.319197	0.00276625	0.014503
ZMYND10	675.67	1.06561	0.00277532	0.014538
DCAF4L1	11.8284	1.28196	0.00279617	0.0146257
PPP1R35	88.8157	0.579842	0.00281835	0.0147195
DND1P1	106.997	1.19292	0.00281796	0.0147195
KRI1	652.431	0.594729	0.00282683	0.014751
CCDC40	3613.92	0.775185	0.00283851	0.0147992
ATG2A	1017.8	0.47804	0.00284531	0.0148251
FOXJ1	588.798	1.16062	0.00284492	0.0148251
ELF3	233.301	1.47498	0.00287126	0.0149313
CHCHD2	803.691	0.460395	0.00287178	0.0149313
PALD1	434.267	0.647882	0.00289624	0.0150188
COBLL1	2417.53	0.771688	0.00290046	0.0150348
LRRC73	97.7011	0.762125	0.00290474	0.0150506
IQSEC2	529.164	0.582963	0.00291473	0.0150927
DVL1	1168.1	0.668851	0.00292579	0.0151273
TTC7B	664.832	0.309859	0.00292433	0.0151273
RP6-109B7.3	2.38993	1.50642	0.00292474	0.0151273
LMAN2L	322.421	0.379829	0.00294085	0.015189
CEACAM5	15.0814	3.99458	0.00294379	0.0151931
TMTC4	1160.1	0.557931	0.0029477	0.0152049
CTD-2555A7.3	14.2229	1.10642	0.00295777	0.0152503
IGSF23	2.32631	2.17644	0.00297979	0.015341
C5orf24	275.352	0.425992	0.00299695	0.0154045
CYB5R3	1429.53	0.469145	0.00299995	0.0154045
GCN1L1	3338.58	0.355206	0.00300518	0.0154178
RSPH6A	4.06249	1.28633	0.00302066	0.0154725
PAQR4	63.0238	1.04895	0.00302932	0.015507
NR2F1	642.482	1.01171	0.00303316	0.0155119
SHARPIN	191.687	0.465781	0.00304493	0.0155657
RP11-815J4.7	4.31892	1.11757	0.00307164	0.015678
MROH6	109.233	1.43734	0.00309409	0.0157641
FKBP2	185.786	0.536198	0.00309451	0.0157641
TNS1	5030.13	0.632404	0.00310823	0.0158274
FBXW5	702.534	0.46404	0.00311246	0.0158422
MOAP1	250.883	0.371564	0.00313086	0.0159158
AP001062.7	5.06949	1.50791	0.00315335	0.0159999
MIR219-1	7.40033	0.916015	0.0031615	0.0160231
GRK6P1	16.2738	0.995396	0.00316091	0.0160231
MIR548F2	10.4347	1.79653	0.00318189	0.0161009
CTB-180A7.8	1.98839	1.94528	0.00318303	0.0161033
RP11-284N8.3	1.98042	2.05453	0.0032017	0.0161651
C10orf111	2.77007	1.27195	0.00322859	0.0162828
SFTPD	41.0653	1.15924	0.00323114	0.0162922
CTBP1-AS2	43.4741	0.540476	0.0032588	0.0164044
ALMS1P	107.024	0.758832	0.00326157	0.0164082
OR1E1	2.81103	2.04615	0.00326033	0.0164082
CNOT1	9623.53	0.33336	0.00326556	0.0164213
SMG6	2121.05	0.291053	0.00328081	0.0164843
AP001172.2	2.51317	1.84984	0.00328052	0.0164843
B4GALT6	836.406	0.531292	0.00330282	0.0165778
C7orf43	152.77	0.517715	0.0033101	0.0166064
TRIM65	196.197	0.664356	0.0033121	0.0166106
IGHA2	21.843	1.83109	0.00331701	0.0166317
PPP1R3E	15.7082	0.866464	0.00334817	0.0167568
KCNH7	366.962	1.41938	0.00338415	0.0169124
SRM	202.135	0.395244	0.00338503	0.0169133
MIR149	7.95139	1.18947	0.00338579	0.0169136
ZNF689	70.8017	0.521882	0.00338796	0.016921
WDR47	1020.26	0.421516	0.00339069	0.0169311
G6PD	290.87	0.485475	0.00342706	0.0170845
MT-RNR2	104744	0.925635	0.00344423	0.017156
EEF1A1P28	2.42139	1.56194	0.00344856	0.017174
VPS33B	1136.56	0.322432	0.00345166	0.0171859
LRRC10B	15.906	1.42675	0.00346583	0.0172529
ROBO3	354.396	0.609018	0.00346899	0.0172651
RBPMS2	97.5168	0.737105	0.00347853	0.0172984
CHST12	161.049	0.618324	0.00349184	0.0173434
GAPDHP66	1.36334	2.37104	0.00349188	0.0173434
EOMES	114.335	1.98331	0.00350048	0.0173683
FAM203B	3.65384	3.93045	0.0035013	0.0173688
DNMT3A	1260.07	0.518461	0.00350542	0.0173857
AKT1S1	71.0827	0.509926	0.00351022	0.0174024
CTD-2240E14.4	64.9342	1.33223	0.00351782	0.0174293
TUBB3P1	2.69183	1.67898	0.00353647	0.0174932
ZSCAN5D	19.0833	0.976843	0.0035411	0.0175124
HDGF	2011.48	0.442299	0.00356315	0.0176026
IHH	5.20424	1.90823	0.00356477	0.0176026
C16orf80	471.141	0.48951	0.00357235	0.0176319
LOXL3	244.442	0.598228	0.00357444	0.0176342
DOK3	22.4335	0.775322	0.00358851	0.0176964
KLHL36	104.9	0.487417	0.00359485	0.0177096
NEUROD4	9.75386	2.7266	0.00360957	0.0177568
ST6GALNAC5	285.019	0.844211	0.00361679	0.0177823
FOXQ1	7.04483	1.44588	0.00361695	0.0177823
CAPN10	473.747	0.48263	0.00364899	0.0178848
CLPP	356.467	0.486165	0.00366212	0.0179279
GAPDHP61	183.164	0.560137	0.0036704	0.0179558
WBSCR28	10.9412	1.50242	0.00367442	0.01797
SLC1A4	537.326	0.57239	0.00372957	0.018192
SIMC1	653.146	0.455119	0.00377773	0.0183935
DMBT1	20.7247	1.4233	0.0037909	0.0184465
KIF1A	8861.11	0.651108	0.00379815	0.0184633
RP11-262H14.7	4.49323	1.87569	0.0038237	0.0185726
ZCCHC3	10.6168	0.680838	0.00382549	0.0185755
CDC42EP4	545.6	0.637978	0.00383344	0.0185984
RP11-150O12.5	4.21626	2.06559	0.0038423	0.0186256
ZFP64	492.05	0.501356	0.00386911	0.0187278
MGAT4B	866.694	0.428079	0.00390982	0.0188848
TRAPPC10	1557.76	0.262863	0.00391255	0.0188943
RND3	559.16	0.821027	0.00391535	0.018904
C22orf31	45.8781	0.88863	0.00393459	0.0189769
RP11-333E13.4	14.5091	1.05769	0.00393724	0.0189827
ESRRA	71.6035	0.762526	0.0039379	0.0189827
SPATA2	172.83	0.53385	0.00396399	0.0190932
RP11-19G24.1	5.06612	1.0941	0.00397533	0.0191364
OR13C2	6.25083	1.40787	0.00398836	0.0191915
MIR940	4.93806	0.949648	0.00399021	0.0191966
TADA3	425.653	0.380716	0.00399869	0.0192183
IKZF4	244.903	0.457293	0.00399956	0.0192187
ZC3H3	272.414	0.397228	0.00400074	0.0192204
ZFYVE19	245.68	0.355079	0.00400151	0.0192204
SMG5	2593.29	0.45043	0.00407229	0.0194947
ZNF746	393.19	0.387898	0.00408261	0.0195342
BAI1	2711.03	0.931662	0.00408297	0.0195342
MICA	278.71	1.13821	0.00408782	0.0195459
LINC00961	9.06831	1.41284	0.00409085	0.0195565
USP5	931.801	0.374096	0.00410965	0.019627
UNGP3	21.3389	1.14483	0.00411914	0.0196616
ZDHHC11B	280.746	0.836864	0.00412177	0.0196693
HRH3	88.52	1.69458	0.00412909	0.0197001
TUBG1	517.895	0.451603	0.00413132	0.0197033
RANGAP1	533.475	0.441695	0.00413281	0.0197065
HSD17B14	281.735	0.640819	0.00413464	0.0197085
IMPDH1P6	6.03524	1.17676	0.00415785	0.0198025
DALRD3	457.138	0.585994	0.00417943	0.0198975
RXRB	467.267	0.325171	0.00419716	0.0199701
RP11-642P15.1	27.8144	0.778679	0.00421784	0.0200409
TRMT2A	297.687	0.557847	0.00427198	0.0202268
ZNF219	263.464	0.452462	0.0042825	0.0202647
CACNA1B	1458.07	0.974305	0.00428752	0.0202775
CCDC159	294.621	0.500671	0.00429304	0.0202987
AATK	470.363	0.809643	0.00430297	0.0203417
IDH3G	915.46	0.540387	0.0043264	0.0204325
NCKAP5L	408.784	0.559362	0.00432766	0.0204345
FAM134A	819.893	0.27585	0.00435224	0.0205146
USP19	747.83	0.327053	0.00435491	0.0205214
AC062017.1	4.62346	1.0472	0.00438197	0.0206266
C15orf26	350.441	1.00284	0.00439592	0.0206722
PDPK2	21.0384	0.979835	0.00439937	0.0206844
CPT1C	766.939	0.487838	0.00442124	0.0207509
PDIA4	2018.29	0.431384	0.00443661	0.020815
B9D1	871.715	0.398951	0.00444607	0.0208433
ADAM33	1597.44	1.0183	0.00445584	0.020877
RPL21P42	1.58735	1.59073	0.00447516	0.0209472
ARL8A	1154.18	0.366196	0.00448363	0.0209706
PYCR1	1616.34	0.840351	0.00449727	0.0210171
RPL3P9	1.48592	1.49102	0.00450149	0.0210298
TGS1	1124.02	0.318761	0.00451572	0.0210831
PEPD	898.459	0.396028	0.00454535	0.0212061
NT5DC2	2090.86	0.697477	0.00455641	0.0212495
GPIHBP1	157.261	1.42771	0.00457631	0.0213156
HSD11B1L	153.831	0.509769	0.00457664	0.0213156
ARPC1B	249.538	0.613119	0.00459029	0.0213705
GLI4	136.262	0.631489	0.00459928	0.0214041
VTN	28.1857	0.70803	0.00461253	0.0214575
FAM155B	89.1603	1.13729	0.00463346	0.0215379
FBXL15	18.9373	0.683664	0.00464672	0.0215761
COX8A	210.047	0.574713	0.00465083	0.0215901
ASF1B	19.2666	0.86173	0.00468776	0.0217282
WDR13	366.849	0.418447	0.00471639	0.0218233
TSR3	88.553	0.392711	0.00473517	0.0218893
PIDD	451.994	0.716279	0.00475073	0.0219445
C8orf31	17.0645	0.814624	0.0047678	0.0219982
HRAS	325.036	0.478664	0.00477473	0.0220176
RP11-440K22.1	29.628	1.34129	0.00480269	0.0221338
ACTR1B	512.985	0.276688	0.00480684	0.0221403
ATF6B	1084.95	0.31497	0.00480571	0.0221403
MIR1301	7.39305	0.997677	0.00480851	0.0221438
FDXR	275.297	0.534094	0.00481569	0.0221727
UBXN7-AS1	10.3685	0.940236	0.00481804	0.0221793
TRMT2B	718.601	0.35554	0.00482325	0.0221948
C2CD4C	134.372	1.41276	0.00482847	0.0222104
ODF3B	261.033	1.00291	0.00484885	0.0222872
ADCYAP1R1	2190.01	0.68581	0.00485487	0.0223064
GSTP1	954.018	0.522629	0.00487713	0.0223917
CCDC170	756.677	0.898434	0.00488797	0.0224227
VOPP1	211.703	0.461854	0.00488851	0.0224227
LZTS3	241.943	0.744379	0.00489508	0.0224443
ANKS3	355.098	0.506341	0.00492386	0.0225507
AC016586.1	5.50047	0.932526	0.00492961	0.0225728
RELT	171.455	0.648191	0.00493061	0.0225731
B3GALT6	12.2128	0.83807	0.00494116	0.0226128
GNL1	985.37	0.293031	0.00495402	0.0226631
CARHSP1	144.232	0.665503	0.00496216	0.0226832
GOLIM4	3774.26	0.582511	0.00496341	0.0226847
DHX9P1	3.99173	1.0811	0.00496901	0.0227017
GRINA	597.636	0.420837	0.00499175	0.0227712
DHX30	1478.9	0.308394	0.00502424	0.0228849
LMF2	235.52	0.502404	0.0050259	0.0228882
MSLNL	5.75623	1.77832	0.00503112	0.0229064
TERF2	731.679	0.276141	0.00503812	0.0229309
PISD	313.014	0.38251	0.00504541	0.0229598
MTRNR2L9	2.75863	1.37912	0.00504942	0.0229737
TUBB4AP1	4.27174	1.58972	0.00506358	0.0230208
AMIGO2	180.795	1.01006	0.00507571	0.0230674
ZBTB46	44.8964	0.690143	0.00507694	0.0230686
RPAP1	481.181	0.373081	0.00508828	0.0231115
TMEM53	17.9464	0.595543	0.00509198	0.0231239
RGAG4	422.749	0.442387	0.00510257	0.023164
PIF1	43.6806	0.942937	0.00511099	0.0231868
DDX23	1779.9	0.320082	0.00512556	0.0232416
SGSM2	1307.28	0.356975	0.0051283	0.0232497
NCCRP1	3.26146	2.30877	0.00514054	0.0232837
ZNF707	62.2222	0.638236	0.00514461	0.0232974
SIVA1	214.899	0.577946	0.00515478	0.0233391
WDR82	1236.32	0.433228	0.00516131	0.0233643
MSNP1	12.5023	0.993091	0.00516455	0.0233746
SYNC	272.336	0.727705	0.00517192	0.0233992
CYSTM1	133.981	0.69131	0.00518423	0.023433
CCT6A	1778.25	0.345388	0.00519123	0.0234517
ZC3H7B	1420.59	0.410631	0.00519122	0.0234517
CSNK1G2	620.437	0.405596	0.00520309	0.0234964
SPEN	5181.77	0.297301	0.00520487	0.0235
HES2	7.99283	2.47051	0.00520796	0.0235035
MIR99A	23.1322	1.00954	0.00520814	0.0235035
BOK	55.6309	1.13774	0.00521252	0.023517
EXOC7	1500.8	0.324907	0.00530266	0.0238393
LRP10	543.024	0.416763	0.0053063	0.0238513
RP11-274B21.3	595.306	0.55708	0.00532967	0.0239341
PHGDH	2912.15	0.60934	0.00534053	0.0239696
TAC3	9.00551	2.20032	0.00535419	0.0240175
C16orf95	10.3698	1.13485	0.0053806	0.0241137
FDPSP4	2.00929	1.43598	0.0054118	0.0242355
NCAPD2P1	6.20391	2.61869	0.00544632	0.0243721
RP5-875O13.6	5.16508	1.23254	0.00546418	0.0244385
DRAXIN	343.026	1.16387	0.00547663	0.0244761
KRT8P31	10.7931	1.21442	0.00549658	0.0245562
POLDIP2	946.755	0.284096	0.00551397	0.0246282
XPO5	1294.75	0.191446	0.00557386	0.0248368
SRXN1	4.59395	1.25297	0.00560645	0.0249458
GALNT9	203.974	1.35076	0.00560812	0.0249485
CUL9	1596.76	0.296142	0.00563124	0.0250377
SLC4A8	1002.03	0.55343	0.00563564	0.0250527
PID1	209.478	0.926669	0.00564175	0.0250753
NCOR2	7100.62	0.482482	0.00564445	0.0250827
BEX1	566.496	0.837936	0.00565097	0.0251024
CD81	8353.43	0.521124	0.00565986	0.0251271
CTRB1	2.66128	1.26718	0.00566427	0.0251384
TEKT2	788.335	0.932567	0.00566712	0.0251419
DKFZP761J1410	221.667	0.504313	0.00566626	0.0251419
RP11-1246C19.1	16.2434	2.01027	0.00568917	0.0252204
FAM86MP	3.68937	1.90898	0.00569777	0.0252455
MIR1250	10.1506	1.156	0.00570089	0.0252547
SPSB2	94.6576	0.647249	0.00573983	0.0253901
BOP1	216.374	0.581934	0.00575217	0.0254307
WHSC1	2084.45	0.413339	0.0057631	0.0254697
AGO2	1111.14	0.329157	0.00579955	0.0255888
NMRAL1	342.94	0.531904	0.00580084	0.0255898
CIDEC	2.57645	2.21989	0.00581642	0.0256352
PCED1A	756.925	0.463357	0.0058259	0.0256723
WDR6	2571.12	0.434649	0.00583953	0.0257181
INTS3	5667.93	0.418873	0.0058535	0.0257611
FAM96B	314.617	0.449449	0.00587852	0.0258384
CAMSAP3	232.292	1.02163	0.00588762	0.0258737
DTX1	179.075	0.741493	0.00590177	0.0259218
ACADVL	6794.34	0.47734	0.0059071	0.0259341
EIF3CL	17.9166	0.774615	0.00592855	0.025997
CCDC19	1214.08	1.09039	0.005936	0.0260155
KHSRPP1	1.60047	1.53121	0.00593583	0.0260155
AARS2	730.14	0.384577	0.00595187	0.0260709
TBCB	459.107	0.368967	0.00595598	0.0260842
SPG7	2335.86	0.350599	0.0059658	0.0261083
REV1	1534.8	0.306253	0.00597393	0.0261333
GABRD	132.82	1.3685	0.00603018	0.0263235
TMEM259	1198.4	0.416352	0.00606918	0.0264651
SNRNP40	549.768	0.290137	0.00609306	0.0265577
RBM10	2286.59	0.359524	0.00609537	0.0265587
CLCN7	2040.98	0.418717	0.00610175	0.0265704
PDCL3P1	2.15021	2.24606	0.00616355	0.026785
GRIFIN	11.2035	1.0195	0.00620797	0.0269539
AC018755.16	1.96879	1.53773	0.00623349	0.0270405
OAZ3	7.60562	0.772109	0.00623906	0.0270487
GPSM1	2348.08	0.787865	0.00625286	0.0270905
MON1B	336.218	0.351307	0.0062717	0.0271479
TYMS	247.443	0.681465	0.00630536	0.027274
PODXL2	575.685	0.618478	0.00631559	0.0272988
FBXL6	191.42	0.576621	0.00632389	0.02732
AC005822.1	8.13571	0.92673	0.00634312	0.0273836
E2F5	600.781	0.394061	0.00634653	0.0273934
GSE1	2639.11	0.677823	0.00634822	0.0273958
RP11-310A13.2	1.64468	2.98463	0.00636142	0.0274474
MBOAT4	7.21695	0.854422	0.00638103	0.0274979
ZNF99	87.5439	1.89118	0.00639273	0.0275295
REEP2	484.425	0.527802	0.00639923	0.0275404
MIR647	17.0356	0.780468	0.00641884	0.0275974
AC022007.5	19.677	0.855094	0.00643483	0.0276612
GAPDHP39	2.80789	1.122	0.00644055	0.0276809
TCAP	18.4301	0.807054	0.00644352	0.0276888
MEGF6	4074.25	0.894578	0.00645459	0.0277265
IFFO1	491.513	0.517175	0.00646397	0.0277569
PMS2	1989.77	0.384237	0.00647049	0.0277724
PPP4R1	1751.96	0.291765	0.0065135	0.027928
OR13F1	3.24803	1.54703	0.00653208	0.0279898
ANKRD52	1070.43	0.326622	0.0065422	0.0280233
RN7SL1	870.636	1.06078	0.00657317	0.0281261
RNU4-1	19.8042	1.40932	0.00657807	0.0281421
KIAA0895L	218.707	0.633185	0.00658814	0.0281752
HSPA8P9	3.96446	1.07625	0.00660541	0.0282441
DDX56	1095.65	0.329232	0.00661624	0.0282804
HNRNPA3P10	42.608	0.75784	0.00662803	0.0283234
IGHG1	942.092	1.56962	0.00663783	0.0283477
SETD6	387.16	0.32223	0.00664277	0.0283638
SNX25	1305.61	0.485429	0.0066483	0.0283824
SSRP1	2098.79	0.320265	0.00669341	0.0285415
MOSPD3	190.202	0.443043	0.00672661	0.028646
ZKSCAN2	359.575	0.437557	0.00676548	0.0287812
KLF17P1	5.06178	1.07982	0.0068205	0.0289695
ABCA3	1580.8	0.518897	0.00686197	0.0290895
RP11-941H19.1	4.32449	1.32019	0.00687276	0.0291251
AP2A1	1933.54	0.323072	0.00687958	0.0291438
NFAT5	10469.6	0.46247	0.00690142	0.0292107
LARP4	2267.88	0.281701	0.00690439	0.0292182
EFNA3	4.33995	1.26748	0.00695852	0.0294216
THSD1	199.795	0.634697	0.00697193	0.0294577
BAIAP2	2738.39	0.563117	0.00698053	0.0294837
MET	934.219	1.22013	0.00701153	0.0295992
DZANK1	630.832	0.488989	0.00701739	0.0296085
SOCS6	406.668	0.645474	0.0070357	0.0296781
LRRC3	15.6333	1.06989	0.00703634	0.0296781
IL4	4.63989	1.14563	0.00704858	0.0297142
ARRDC1	274.644	0.480983	0.0070856	0.0298443
SLC9A9-AS2	3.56573	1.6646	0.00711969	0.029967
AMPD2	562.246	0.369442	0.00713496	0.0300157
FREM2	5536.41	0.83174	0.00713782	0.0300225
CAD	1858.82	0.38842	0.00719284	0.0301885
DENND4B	855	0.378261	0.00720361	0.0302037
RP11-157L3.4	25.8481	1.1109	0.00721273	0.0302171
NANOS1	4.20818	1.40584	0.00722089	0.0302354
RNF6	712.133	0.313744	0.00722248	0.0302368
GTF2IRD1P1	4.497	1.2046	0.00724935	0.0303386
SCAMP3	394.301	0.413345	0.00726022	0.0303598
C11orf87	17.6086	1.41768	0.00726584	0.0303733
CHD8	5376.96	0.280536	0.00727256	0.0303939
D2HGDH	372.514	0.46545	0.00728844	0.0304498
RNF10	2398.71	0.257555	0.0073503	0.0306659
SUOX	531.643	0.346398	0.00739037	0.0308119
BAG2	64.8795	0.584583	0.00741388	0.0308939
ARHGEF10L	906.245	0.424681	0.00743103	0.0309281
EFS	204.117	0.766616	0.0074416	0.0309609
PRR14	306.984	0.281952	0.00746594	0.0310361
DNAJC11	636.447	0.236507	0.00748226	0.0310986
LRRC29	31.2836	0.648513	0.00748893	0.0311157
STRIP1	1181.87	0.271392	0.00752104	0.0312223
YWHAB	527.398	0.330756	0.00752975	0.031237
CTC-303L1.1	20.4447	0.779071	0.00756974	0.03136
ST8SIA2	911.616	0.93897	0.00757517	0.0313771
LMO4	296.899	0.656608	0.00759338	0.0314364
EN2	4.7376	2.06377	0.00760678	0.0314865
RACGAP1	643.625	0.594787	0.00762612	0.0315461
PTPRN2	852.122	0.635401	0.00762911	0.031552
DMXL2	5568.04	0.382544	0.0076334	0.031559
PSME2	633.262	0.296511	0.00764167	0.0315878
RP11-206L10.1	95.9474	0.55417	0.00768233	0.0317131
MYO18B	20.1234	1.48881	0.00772221	0.0318283
ABTB2	964.288	0.63299	0.00772357	0.0318285
POLRMTP1	6.52951	0.987456	0.00773781	0.0318764
RAB36	479.776	0.492572	0.0077448	0.0318943
LEF1	832.717	0.792754	0.00775668	0.0319324
DMPK	899.334	0.516412	0.0077616	0.0319472
GIMAP1	9.73941	0.847873	0.00776562	0.0319583
AC009362.2	3.37245	1.28813	0.00778495	0.0320215
ZNF710	353.252	0.457433	0.00779025	0.0320379
SNORD3C	242.206	0.757749	0.00779439	0.0320495
AKR7L	112.298	0.838519	0.00783075	0.0321674
RP11-460C6.1	3.11169	2.46509	0.00786712	0.0322828
ZSCAN18	474.479	0.464071	0.00787942	0.0323278
RP1-241P17.4	5.91826	1.09548	0.00788416	0.0323417
GNAI2	2362.82	0.381956	0.00789702	0.032378
ATP2B3	800.816	1.2108	0.00793237	0.032501
PET112	185.187	0.426872	0.00797964	0.0326615
AC068039.4	3.39551	1.02965	0.00799154	0.032698
FOSL1P1	6.67714	0.919217	0.00799259	0.032698
INPP5E	689.771	0.445398	0.00799424	0.0326992
ZNF806	2.36014	1.3977	0.00800208	0.0327257
PTPLAD1	731.757	0.372196	0.0080103	0.0327538
RAB1B	200.373	0.537031	0.00802041	0.0327785
MKRN3	415.815	0.703786	0.00802685	0.0327938
ZXDC	796.887	0.291182	0.00804197	0.0328445
BRI3	381.731	0.315333	0.00808199	0.0329753
GEMIN8	238.888	0.346777	0.00809032	0.0329919
C16orf74	3.01591	1.3507	0.00809654	0.0330117
CEND1	8.94991	0.994987	0.00811437	0.0330788
PLEKHA6	421.592	0.736092	0.00812662	0.0331124
POLR2CP	0.932096	1.54297	0.00812671	0.0331124
TAZ	962.911	0.309333	0.00813147	0.0331164
CES2	555.919	0.448359	0.00815901	0.0332049
ARC	77.7572	1.09463	0.00816401	0.0332197
GOLGA2P4	5.86601	1.25512	0.00824764	0.033515
ABCB10P1	2.12197	2.11577	0.00825543	0.033541
ZNF625-ZNF20	2.98156	1.60201	0.00829622	0.0336615
FAM84A	26.7199	0.988517	0.00831306	0.0337185
ELMSAN1	1757.54	0.517871	0.00832442	0.0337533
DDX60	1787.02	0.625578	0.00832753	0.0337603
TCF24	3.11618	1.34014	0.00834815	0.0338213
HP1BP3	3181.02	0.316697	0.00838201	0.0339414
C6orf106	695.786	0.289359	0.00839386	0.0339667
PDE10A	723.209	1.09975	0.00842297	0.034056
SPINK8	38.1056	0.76501	0.00844792	0.0341341
SLC39A1	263.953	0.459775	0.00847151	0.0342123
HMGCS2	5.34516	1.53272	0.00852836	0.0344247
NFIC	1251.15	0.376324	0.00854085	0.0344636
DNM1L	5077.88	0.329534	0.008567	0.0345461
DIDO1	2192.31	0.235401	0.00859846	0.0346614
LANCL2	267.899	0.434444	0.00860682	0.0346856
GRIN2D	228.692	1.08172	0.00863811	0.0347865
NAA40	395.949	0.464258	0.00866987	0.034897
THEM6	7.73463	0.869061	0.00867293	0.0348978
IGKV1D-12	2.92709	3.57951	0.00869862	0.0349779
STAG3L4	216.774	0.422029	0.00870535	0.0349933
KRT18P33	1.71947	1.46813	0.00872236	0.0350501
ACTBP11	4.96399	1.02117	0.0088181	0.0353684
CUEDC1	1326.44	0.43503	0.00888448	0.0355894
AFG3L2P1	1.53151	1.46633	0.00890002	0.035633
THBS3	3404.9	0.563159	0.00895312	0.035789
RP11-434I12.5	2.325	1.40829	0.00895353	0.035789
AP3D1	2695.62	0.32622	0.00897059	0.0358319
MESDC1	11.3534	0.766688	0.00897492	0.035839
RAI1	3085.51	0.388556	0.00898638	0.0358611
PRICKLE4	138.197	0.605999	0.009034	0.0360156
MAP2K3	1004.07	0.605816	0.00904644	0.0360592
DERL3	35.7415	0.733286	0.00904919	0.0360643
JAG2	2961.01	0.943978	0.00907938	0.0361681
IFT43	997.579	0.353115	0.0090903	0.0362042
LETM1	721.667	0.368754	0.00911308	0.0362771
VPS16	412.95	0.287398	0.00911774	0.036287
NUTM2F	19.7726	1.25104	0.00912497	0.0363006
PGAM1P5	4.62153	1.34616	0.00918122	0.0364525
SPON2	152.399	0.930785	0.00925662	0.0366917
PAPL	7.28453	2.98861	0.00926452	0.036705
TM4SF18	51.3031	0.713341	0.00926965	0.0367133
RUFY4	85.3674	1.42516	0.00929596	0.0367875
SAPCD2	84.1866	1.25753	0.00935471	0.0369716
RP1-127B20.4	3.32681	1.2448	0.00937163	0.0370264
CIB1	351.715	0.467559	0.00938306	0.0370595
RP11-420K14.1	73.4872	1.00164	0.00938215	0.0370595
LRP5	2321.8	0.612678	0.00939277	0.0370918
KRT8P40	3.64247	1.22938	0.00941829	0.0371683
AFP	2.238	2.08881	0.00942948	0.0371943
VDAC3P1	1.56813	1.66659	0.0094451	0.0372256
RP11-430C7.5	6.05248	1.3155	0.00945406	0.0372428
SCMH1	1726.45	0.404747	0.00949254	0.0373579
AHCYP5	1.23857	2.00338	0.00950074	0.0373737
CDH24	305.87	0.735491	0.0095012	0.0373737
TRPM2	353.291	0.685286	0.00953159	0.0374629
RP11-766F14.2	26.8	1.94465	0.00953872	0.0374848
FOXP2	1184.16	1.27677	0.00955505	0.0375308
ACTBP9	2.84699	1.24303	0.00956871	0.0375783
hsa-mir-1199	43.7646	0.870968	0.00959251	0.0376534
FAM13C	802.637	0.373038	0.00959521	0.0376566
RP11-378G13.2	5.22062	0.915862	0.0096597	0.0378688
PHYHIPL	1431.4	0.590504	0.00965989	0.0378688
AC008132.13	2.18235	2.89409	0.00965709	0.0378688
PRR5	51.604	0.954544	0.00967978	0.0379223
SMPD4	792.555	0.287811	0.0096894	0.0379538
GAPDHP25	1.08634	1.79354	0.00970229	0.0379981
MYEF2	3051.24	0.360729	0.00975173	0.0381424
DUSP28	2.27116	1.20247	0.0097541	0.0381456
UBE2Q1	911.706	0.363836	0.00980956	0.0383191
KIAA0226	1029.66	0.295872	0.00982037	0.0383512
WFS1	1353.04	0.53146	0.00982111	0.0383512
PNMA3	706.434	1.02974	0.00985321	0.0384524
ZNF428	142.039	0.46529	0.0098586	0.0384673
B4GALT2	337.444	0.383991	0.00987058	0.0384906
FRYL	4402.86	0.279884	0.00987093	0.0384906
TFIP11	460.884	0.323927	0.00987002	0.0384906
RHEBL1	120.412	1.0881	0.00989335	0.0385408
KRTAP5-7	37.0045	1.13342	0.00994881	0.0387008
HMGN3P1	1.22405	1.64596	0.00995803	0.0387052
TP53BP2	2152.53	0.421154	0.00995567	0.0387052
CTC-575N7.1	1.0039	2.19016	0.00995911	0.0387052
MAPRE1	841.602	0.344136	0.00995915	0.0387052
TCF25	1597.53	0.284558	0.00996897	0.0387295
SLC25A4	383.804	0.4395	0.00997669	0.0387408
ZNF703	222.011	0.818261	0.00997535	0.0387408
TCF19	29.9138	0.748367	0.0099913	0.0387851
SPACA4	4.37548	1.80276	0.00999562	0.0387957
PARP14	4346.73	0.535967	0.0100572	0.0389846
SRI	3261.89	0.445513	0.0101041	0.0391476
ARHGEF16	194.693	1.04193	0.0101634	0.0393461
TMEM74B	19.7201	0.890532	0.0102027	0.0394917
ENPP7	3.6988	1.41252	0.0102426	0.0396146
LMOD3	8.78744	0.949067	0.0102461	0.0396153
AC073842.18	5.01862	0.966833	0.0102761	0.0397189
MYEOV	18.5688	1.20948	0.0103148	0.0398556
MOCS3	44.7206	0.371021	0.0103313	0.0399123
FLNA	19029	0.563221	0.01034	0.0399339
YIF1B	215.45	0.443677	0.010351	0.03997
MIR483	16.8465	0.829698	0.0103578	0.0399901
MRP63	256.951	0.507667	0.0103743	0.0400282
ZIC1	920.604	0.811185	0.0103901	0.0400636
TNFSF13	10.9167	0.923862	0.0103875	0.0400636
PVRL2	397.177	0.621572	0.0104255	0.0401554
ODF3L2	4.65616	1.42749	0.0104357	0.0401883
SCG2	314.719	1.09174	0.0104868	0.0403521
PHACTR1	1260.81	0.543609	0.0104868	0.0403521
UFSP1	4.48303	0.820061	0.0106123	0.0407374
NAT1	17.8011	0.990562	0.0106267	0.0407741
AHDC1	685.116	0.427173	0.0106551	0.0408514
RP11-646D13.1	19.0853	1.1574	0.0106883	0.0409272
H2AFX	341.053	0.759809	0.0106882	0.0409272
MMP17	377.182	0.81633	0.0107114	0.0410086
CBX6	269.147	0.563342	0.0107251	0.0410289
LINC00483	1.59133	2.47255	0.0107594	0.0411341
CLEC17A	9.52599	1.50359	0.0107775	0.0411835
RP11-31L23.3	2.80357	1.31096	0.0107942	0.0412129
CIC	2315.69	0.359105	0.0107954	0.0412129
AAGAB	670.268	0.280356	0.0108075	0.0412465
RPL7L1P4	1.69626	1.58159	0.0108174	0.0412579
BAZ1B	3613.58	0.296229	0.0109066	0.0415461
MIR548AA1	5.95999	1.07831	0.0109169	0.0415721
ABTB1	438.664	0.63597	0.0109271	0.0415978
MAP2	3347.32	0.641776	0.0109366	0.0416209
RIC8A	821.252	0.327716	0.0109397	0.041626
MICD	3.56781	1.07231	0.0109668	0.0416703
LAMA1	2530.76	0.874859	0.0109728	0.0416789
SEMA3G	27.9453	1.02988	0.01099	0.041719
IL17D	15.1071	0.97354	0.0110273	0.0418412
RELL1	348.935	0.446929	0.0111226	0.0421237
CCT7P1	4.73856	0.985905	0.0111264	0.0421269
RPS6KA2	598.886	0.412235	0.0111747	0.0422614
SLC7A5P1	48.5279	0.930483	0.0111768	0.0422627
ISG15	139.205	1.12088	0.0112013	0.0423423
MFSD12	433.589	0.364931	0.0112396	0.0424574
ARL16	111.368	0.469178	0.0112585	0.0425121
MAGI2	1941.92	0.565816	0.0112892	0.0426147
ZNF623	420.421	0.286727	0.0112946	0.0426282
FIS1	425.943	0.349557	0.0113346	0.0427728
YAP1	2256.24	0.409545	0.0113376	0.0427774
E2F4	557.715	0.346401	0.0113502	0.0428183
AFAP1L2	728.015	0.904377	0.0113915	0.0429338
FIZ1	58.9361	0.578363	0.0114821	0.0432371
DIRC2	449.116	0.382123	0.0115221	0.0433722
FBXW9	261.535	0.544275	0.011525	0.0433763
NUDT12	188.782	0.453301	0.011584	0.0435578
LRRC37A14P	9.91307	1.32389	0.0116249	0.0436643
NAT8	45.7026	0.797595	0.0116458	0.0437289
FOXK2	562.814	0.35137	0.0116596	0.0437672
ARHGAP27	102.098	0.549002	0.0116708	0.0437899
NALCN	606.584	0.868356	0.0116943	0.0438499
AC009963.5	1.14543	1.75071	0.0116978	0.0438564
SIDT1	619.24	0.896018	0.0117084	0.0438776
CHD4	8394.49	0.303458	0.0117089	0.0438776
SPEF1	86.1775	0.904789	0.0118015	0.0441564
GNL3L	915.172	0.242236	0.0119027	0.0444634
RP11-67L2.2	44.0688	0.478677	0.0119119	0.04448
TPSB2	51.6683	1.62128	0.0119186	0.0444983
JPH4	537.419	0.992076	0.011927	0.0445226
PIP4K2C	395.31	0.239306	0.0119642	0.0446098
SDSL	139.778	0.753205	0.0119738	0.0446296
CTC-451A6.4	2.45523	2.85458	0.0119969	0.0446872
DCTN1	4893.91	0.339939	0.0120294	0.0447678
AC104472.1	5.80552	1.19253	0.0120458	0.0448144
GLP1R	3.19836	1.82355	0.0121653	0.0451615
TMEM151A	12.4108	1.09114	0.0121751	0.0451758
DNTTIP1	221.485	0.302686	0.0121766	0.0451758
IPMKP1	1.95679	1.60203	0.0122021	0.0452637
PAK4	225.98	0.456288	0.0122218	0.0453159
GATAD2A	640.659	0.274184	0.0122294	0.0453303
GRIN1	502.919	1.6087	0.0122333	0.0453352
SMIM5	13.5622	0.819173	0.0122543	0.0453809
NKPD1	15.7417	0.972652	0.0122527	0.0453809
APOA1BP	569.01	0.487486	0.0123061	0.0455447
THOP1	337.664	0.39142	0.0123336	0.0456186
CSNK1A1P3	1.43348	1.74058	0.0123532	0.0456632
CD300LF	8.64364	0.955082	0.0123837	0.0457524
IGF2-AS	16.1935	0.864063	0.0124408	0.0459242
RP11-598D12.4	6.90753	1.07576	0.0124457	0.0459349
PNLDC1	9.23553	0.897965	0.012464	0.0459817
SEMA6B	326.212	0.855172	0.0124618	0.0459817
PTHLH	219.872	0.917468	0.012504	0.0460802
GGA3	690.807	0.235799	0.012504	0.0460802
ZNF598	259.79	0.425509	0.0125216	0.0461169
C11orf83	19.5312	0.612908	0.0125269	0.0461293
PNKP	1608.98	0.408908	0.0125844	0.0463058
C9orf139	4.13975	0.773133	0.0126225	0.0464107
HIST1H3G	256.448	1.06699	0.0126457	0.0464609
RN7SKP274	1.57189	1.75614	0.0126671	0.0465114
DLL1	775.973	0.750419	0.0126816	0.0465433
CTA-246H3.8	2.67252	1.54869	0.0126874	0.0465507
ITGA6	2059.53	0.507138	0.0127288	0.0466532
CTU1	11.4764	0.799124	0.012745	0.0467052
ALPK1	808.919	0.545742	0.0128219	0.0469445
ACTL10	7.3892	0.97895	0.0128261	0.0469529
HERC2P3	961.654	0.905803	0.0128472	0.0470231
ATXN7L3	480.948	0.284134	0.0128673	0.0470894
ATP6V0A2	1217.09	0.220902	0.012907	0.0472063
NUDT14	112.432	0.685406	0.0129538	0.0473272
CDC34	786.397	0.439927	0.0130139	0.047511
MIR609	19.9399	0.985434	0.0130245	0.0475424
GOLGA6L2	7.54825	1.97897	0.0130328	0.0475514
CXCR3	3.69054	1.00647	0.0130326	0.0475514
LIPE	191.059	0.473138	0.0130628	0.0476463
PHKG1	325.691	0.547097	0.01307	0.0476656
RP13-88F20.1	3.78874	1.01671	0.0130904	0.0477327
PHLDB1	2055.64	0.389032	0.0131078	0.0477812
RP11-390K5.1	14.2406	0.899456	0.0131573	0.0479118
ATG4D	107.734	0.424389	0.0131696	0.0479361
ARMC2	1730.93	0.528273	0.0131853	0.0479776
RRNAD1	307.364	0.369227	0.0131949	0.0480054
PKN3	144.537	0.6262	0.0131989	0.0480126
CHRNA4	3700.68	1.04998	0.0132378	0.0481326
HERC2	8588.66	0.254567	0.0132609	0.0482094
SLC35G5	58.7191	0.744745	0.0132844	0.0482586
RP11-255H23.2	115.069	1.02828	0.0132943	0.04828
SPATA6	1670.21	0.424424	0.0133018	0.0482855
NFRKB	1115.09	0.290127	0.0133008	0.0482855
NEIL2	179.146	0.477661	0.0133165	0.0483172
GPBP1L1	1029.12	0.2684	0.0133335	0.0483645
CD2BP2	531.396	0.334708	0.013342	0.0483806
2009-09-01	12722.3	0.427061	0.0133776	0.0484641
NBPF23	529.409	0.67287	0.013416	0.0485762
NCAPH2	399.847	0.346998	0.0134473	0.0486606
HMGB1P16	4.64862	1.27151	0.0135362	0.0489383
TMEM223	129.827	0.420388	0.0135494	0.0489727
CTD-2619J13.19	2.59644	1.35784	0.0135498	0.0489727
OPA3	28.9559	0.541306	0.0135579	0.0489795
RPL7AP26	4.91311	0.895654	0.0135743	0.0490176
LMAN2	825.986	0.372173	0.0135814	0.0490213
ANKRD11	7937.95	0.328454	0.0136059	0.0490995
BRF1	828.344	0.481351	0.0136714	0.0492946
HSPA1L	104.151	0.497191	0.0136869	0.0493285
FAM83G	231.91	0.884274	0.0137317	0.0494413
COQ5	728.654	0.253342	0.0137529	0.0494857
NDOR1	217.874	0.32739	0.0137588	0.0494932
ZGPAT	15.2472	0.56503	0.0137642	0.0494968
GDPD4	142.43	1.23046	0.0137832	0.0495504
RABIF	23.9588	0.499835	0.0138118	0.0496383
RP11-550I15.1	2.22688	1.82928	0.0138218	0.0496669
GCNT4	112.83	0.853824	0.0138526	0.0497628
RP11-325L7.1	4.28975	1.4378	0.0139083	0.0499112
RP11-360D2.2	2.85349	1.08423	0.0139141	0.0499173
UNC5B	648.379	0.533213	0.0139126	0.0499173
MAP2K1P1	6.7287	1.29971	0.0139196	0.0499296

## Sheet: Cluster 2
Gene	baseMean	log2FoldChange	pvalue	padj
SH3GL1	736.19	-1.73809	3.74578e-11	2.56347e-08
NR4A3	216.391	-3.54444	4.91047e-11	3.0805e-08
MYLK	1335.39	-2.13357	9.8362e-11	5.99132e-08
PVRL3	802.244	-1.83286	3.28461e-10	1.51387e-07
STAC2	589.987	-3.96724	5.20879e-10	2.30658e-07
SUCO	2478.84	-1.25638	6.02877e-10	2.61834e-07
ACSL1	521.117	-1.72837	8.80022e-10	3.72594e-07
MYPN	18.6399	-3.46145	1.66676e-09	6.17083e-07
LTBP2	2229.27	-2.5001	2.0011e-09	7.17347e-07
CYR61	1084.18	-2.53318	3.6584e-09	1.21502e-06
CPNE5	156.556	-2.90213	3.98089e-09	1.30296e-06
CD36	366.6	-3.86173	4.54126e-09	1.46514e-06
CAMKK1	166.772	-2.56006	5.30362e-09	1.66357e-06
C11orf96	144.406	-2.48851	5.88967e-09	1.82209e-06
OSBPL11	533.11	-1.13351	6.66144e-09	2.00589e-06
RYR3	1533.5	-2.81114	7.48923e-09	2.22548e-06
DNAJB1	676.797	-1.39424	5.17891e-08	1.14026e-05
LRRK2	1062.4	-2.18222	6.46105e-08	1.3637e-05
PPP1R3C	677.548	-2.07034	1.04941e-07	2.02547e-05
KATNA1	307.569	-0.91718	1.15364e-07	2.18939e-05
CXCR4	459.683	-1.67002	1.19208e-07	2.2435e-05
PTGES3P1	101.439	-1.51463	1.3494e-07	2.50502e-05
NFIL3	163.455	-1.65048	1.35323e-07	2.50502e-05
PPP1R12B	1655	-1.13582	1.48872e-07	2.66836e-05
OCA2	376.211	-3.58542	1.75731e-07	3.05286e-05
VMP1	840.567	-1.0171	2.39357e-07	4.00418e-05
ITGA3	744.641	-2.07395	2.47019e-07	4.10197e-05
PPARG	118.337	-2.94123	3.01858e-07	4.80082e-05
SYNPO2	330.694	-2.10697	3.37129e-07	5.19905e-05
CDKN1A	608.243	-1.7093	4.06002e-07	5.95399e-05
ENOX2	218.691	-1.63208	4.55356e-07	6.55017e-05
ABHD2	414.96	-0.867494	5.54104e-07	7.72462e-05
EMP1	502.794	-2.32788	5.61153e-07	7.72749e-05
SPTB	344.802	-1.88342	5.6026e-07	7.72749e-05
SERPINA11	23.9057	-7.19611	6.14125e-07	8.35506e-05
ZBTB16	1179.42	-1.76955	6.69232e-07	8.94316e-05
SDK2	1152.49	-1.88827	7.00567e-07	9.30683e-05
SPARCL1	2403.5	-1.49401	7.11602e-07	9.39813e-05
NRG2	309.323	-1.91875	1.00044e-06	0.000122793
PDK4	490.99	-1.9832	1.04744e-06	0.000127867
MYO1E	2038.85	-0.90564	1.0577e-06	0.000128425
GALNT2	1310.72	-1.00596	1.06409e-06	0.000128511
PALMD	282.275	-1.61075	1.10377e-06	0.000132593
MYC	156.212	-1.74501	1.11534e-06	0.000133275
SCD5	858.911	-1.24406	1.12385e-06	0.000133584
TIPARP	782.55	-1.63524	1.4838e-06	0.000166717
ABLIM3	1021.02	-2.32053	1.74817e-06	0.000188903
NOL10	683.643	-0.563025	1.83016e-06	0.000195887
HMGB1P8	28.0401	-1.97613	1.97081e-06	0.000208962
HADHB	2658.37	-0.819571	2.00621e-06	0.000209305
FRMD5	267.724	-1.63889	2.01113e-06	0.000209305
SERPINA9	12.8489	-6.92029	2.12123e-06	0.000218748
OR13J1	8.0008	-3.43682	2.17248e-06	0.000223015
RNF13	679.097	-0.956306	2.21776e-06	0.000225612
IDO2	3.28079	-4.84501	2.21357e-06	0.000225612
HSPA6	152.416	-2.72662	2.33076e-06	0.000236044
COL9A2	362.322	-1.81023	2.42023e-06	0.000244011
CPM	188.694	-2.01793	2.88593e-06	0.000283373
C1QL2	187.998	-4.43412	2.91518e-06	0.000283777
ADPRM	149.606	-1.2314	3.00704e-06	0.000291463
SSR3	253.402	-0.967985	3.10058e-06	0.000299245
SNX10	74.8016	-2.03353	3.19191e-06	0.000305449
EVI2B	282.269	-1.28414	3.39425e-06	0.000318305
CLASP1	3251.36	-0.673746	3.49621e-06	0.000324838
FARP1	1370.28	-1.12675	3.53685e-06	0.000324838
SQLE	778.247	-0.92994	3.69129e-06	0.000334795
ENPEP	361.027	-1.24448	3.80436e-06	0.000342302
CYP4F22	4.62243	-4.64407	4.11323e-06	0.000366269
ETF1	659.96	-0.76981	4.258e-06	0.000372724
UBE2A	332.264	-0.715371	4.32518e-06	0.000377142
ANGPTL1	183.143	-1.84479	4.401e-06	0.000380813
ATP1B4	70.2091	-4.59421	4.64229e-06	0.000398637
MBD4	518.251	-0.918047	4.82827e-06	0.000413036
GFPT2	229.017	-2.34839	5.05402e-06	0.000425896
AK3P5	38.8653	-1.57815	5.14863e-06	0.000430654
QSOX1	806.917	-1.23086	5.2964e-06	0.000438756
FKBP5	473.914	-2.05294	5.30378e-06	0.000438756
EGR2	379.67	-2.34019	5.58389e-06	0.000456907
LRRIQ3	14.694	-2.05479	5.6944e-06	0.00045899
PAPOLG	640.863	-0.786332	5.66903e-06	0.00045899
GTF2H2	290.069	-1.32912	5.68977e-06	0.00045899
IPO7	3027.49	-0.838409	5.69358e-06	0.00045899
PLAG1	18.7265	-2.34105	6.321e-06	0.00050089
RP11-674I16.2	27.8984	-1.67521	6.70766e-06	0.000522689
C11orf73	276.325	-0.75159	6.7086e-06	0.000522689
DSTN	634.942	-1.02435	7.21105e-06	0.000555817
RGS2	280.249	-2.01501	7.68353e-06	0.000586233
GKN1	10.3952	-8.6043	7.76056e-06	0.000590116
PLXNA4	883.279	-2.35054	7.82577e-06	0.000591095
PEBP4	24.6219	-3.71406	8.27655e-06	0.00061689
RHOB	603.322	-1.44137	8.53834e-06	0.000632229
ALKBH5	413.784	-0.76334	8.53017e-06	0.000632229
RAB6B	241.398	-1.78523	8.60964e-06	0.000635425
HBEGF	183.274	-1.53518	8.86879e-06	0.000650301
TDGF1	9.47644	-3.74545	9.05597e-06	0.000659742
CSNK2A2	719.29	-0.517691	9.73597e-06	0.000693619
CRYAB	2010.44	-2.3372	9.89056e-06	0.000700215
RP11-170L3.4	2.80252	-3.03303	1.016e-05	0.000710383
FAM134B	348.646	-1.37277	1.0205e-05	0.000711329
RGMA	268.102	-1.71066	1.0265e-05	0.00071331
OGFRL1	1054.3	-1.39775	1.06394e-05	0.000737056
HPR	87.5727	-1.45151	1.0955e-05	0.000749784
SEC14L1	1371.57	-0.574337	1.09559e-05	0.000749784
RAB11FIP2	1025.04	-1.23123	1.12202e-05	0.000762339
GALNT18	235.658	-1.20003	1.12406e-05	0.000762339
RP11-420K8.2	16.2689	-1.53358	1.13104e-05	0.000764771
AIDA	464.887	-0.898039	1.15385e-05	0.000775549
LMCD1	72.1063	-1.68406	1.2168e-05	0.000803515
CD300LG	3.08697	-4.58413	1.22597e-05	0.000807213
NLRP3	206.585	-1.98785	1.30457e-05	0.000837
TRAJ16	5.79069	-4.09773	1.3043e-05	0.000837
PPP4R4	158.447	-2.55764	1.32923e-05	0.000848001
CD99	1939.37	-1.1379	1.33808e-05	0.000851245
SIK1	389.377	-1.32536	1.38929e-05	0.000881343
SIRT2	535.829	-0.697743	1.42758e-05	0.000902721
IGLV2-23	44.6362	-4.83593	1.43099e-05	0.000902721
NR4A2	326.352	-2.45594	1.46313e-05	0.000917867
CDON	9047.6	-2.61587	1.48721e-05	0.00093039
PLXND1	1297.6	-1.15455	1.54081e-05	0.000948164
PEX3	793.695	-0.676717	1.56319e-05	0.00095932
NAMPT	3748.5	-1.65851	1.60385e-05	0.00098161
HIF1A	3174.03	-0.984942	1.61928e-05	0.000988375
GPR83	5.60251	-2.97797	1.63474e-05	0.000995121
RGS7	103.892	-3.3606	1.64917e-05	0.000995853
GRIN2C	212.644	-2.2524	1.72346e-05	0.00103518
TRIB1	319.742	-1.37924	1.78176e-05	0.00106453
SERPINE1	936.87	-2.25495	1.84313e-05	0.00108682
ATP1B3	487.188	-1.01243	1.9064e-05	0.00111251
RNF138	347.964	-0.719267	1.92214e-05	0.0011188
KLF6	2662.88	-1.63129	2.01535e-05	0.0011565
RPS3AP5	5.20523	-2.23231	2.03811e-05	0.0011565
STK38L	1109.32	-0.858092	2.03359e-05	0.0011565
RPS6KA5	489.351	-1.0649	2.02064e-05	0.0011565
ST3GAL6	150.607	-1.56981	2.0562e-05	0.0011579
NET1	497.676	-2.0759	2.06108e-05	0.0011579
MRVI1	284.068	-1.43324	2.10281e-05	0.00117259
CNOT2	1513.53	-0.49383	2.13008e-05	0.00117618
TNR	196.174	-3.19888	2.21226e-05	0.00120973
GPR137B	660.658	-1.44616	2.26355e-05	0.00123478
DDX21	1042.11	-0.675212	2.3095e-05	0.00125379
AKR1C3	170.414	-2.15375	2.32578e-05	0.0012596
OVGP1	80.964	-1.33962	2.40752e-05	0.00129857
AL365202.1	24.9326	-1.8403	2.43804e-05	0.00130625
MAB21L1	69.8754	-1.48347	2.44662e-05	0.00130625
MEF2A	864.482	-0.807805	2.44234e-05	0.00130625
ZMPSTE24	518.247	-0.815773	2.61822e-05	0.00138476
PXDC1	113.741	-1.37544	2.62432e-05	0.00138476
NR4A1	532.773	-2.07752	2.70829e-05	0.00140966
GK	1029.41	-0.977943	2.70896e-05	0.00140966
IPO5	3077.3	-0.59733	2.71876e-05	0.00141151
UBE2D3	1564.92	-0.585973	2.74952e-05	0.00142161
WI2-1896O14.1	119.739	-2.0646	2.78444e-05	0.00142918
NFU1	349.394	-0.77378	2.86365e-05	0.00145659
KRT16P3	3.33973	-5.4597	2.89959e-05	0.00146497
COL28A1	462.893	-1.5082	2.92142e-05	0.00146617
UBAP1	567.586	-0.728253	2.95514e-05	0.00147326
SDR9C7	3.66189	-5.14177	2.98066e-05	0.00148022
SLC38A6	506.513	-0.877064	2.98221e-05	0.00148022
TEX15	28.0772	-2.87979	3.0835e-05	0.00152208
NPEPPS	2841.14	-0.52176	3.35557e-05	0.00164031
SMAP2	412.872	-0.958793	3.41124e-05	0.00164967
GREB1L	1116.46	-1.72869	3.6758e-05	0.0017367
RB1	2612.5	-0.716698	3.71031e-05	0.00174934
GLUL	5922.71	-1.18589	3.73729e-05	0.00175839
GRAMD2	136.35	-2.20499	3.84328e-05	0.00179703
CDKL5	893.231	-1.13961	3.86236e-05	0.00179851
BMP6	170.188	-2.24019	3.88502e-05	0.00180286
RPRD1B	247.476	-0.590254	3.88768e-05	0.00180286
PTPLB	280.253	-0.904021	4.0101e-05	0.00184218
GAN	999.951	-0.824669	4.27418e-05	0.00194222
MCL1	1560.29	-0.985429	4.32603e-05	0.00195109
RP5-1022P6.3	40.2756	-1.67585	4.49933e-05	0.00201213
IGLON5	42.2639	-3.32308	4.52896e-05	0.0020174
CTH	224.907	-0.979757	4.57465e-05	0.00203374
RAB18	3460.03	-0.930981	4.63677e-05	0.0020573
SYNE3	550.819	-1.41438	4.8117e-05	0.00212241
RHOT1	1168.62	-0.51776	4.84108e-05	0.00213121
ATP6V0A1	2068.57	-0.546892	4.96158e-05	0.00218001
STRN	833.332	-0.474152	4.9949e-05	0.00219038
UBE2B	926.338	-0.705875	5.02682e-05	0.00220011
NUDT4P1	14.1184	-2.03009	5.0622e-05	0.00220574
BMP2K	1197.6	-0.668908	5.14317e-05	0.00222943
RHOU	385.18	-1.69836	5.27834e-05	0.00227493
ECM2	507.558	-1.82861	5.38566e-05	0.00230467
C4orf33	158.058	-1.27834	5.48571e-05	0.0023238
MMP9	166.324	-2.44055	5.6615e-05	0.00237216
NUDT4	654.075	-1.20987	5.79445e-05	0.00241889
AQP7	3.09286	-3.42881	5.8299e-05	0.0024292
IL1B	239.669	-1.66395	5.87353e-05	0.00243959
C22orf24	6.06883	-2.31931	5.96299e-05	0.00245745
PSMD12	559.76	-0.598916	5.98319e-05	0.00246128
NEXN	375.045	-1.48291	6.10038e-05	0.00250493
KCNQ3	668.856	-2.01653	6.23434e-05	0.00254145
MTNR1B	42.4746	-2.84693	6.21394e-05	0.00254145
DGKI	581.326	-2.04325	6.27489e-05	0.0025442
SLC19A2	221.855	-1.09323	6.57676e-05	0.00264759
VAPA	1313.1	-0.698839	6.56988e-05	0.00264759
HSDL2	625.961	-0.922971	6.66826e-05	0.00267014
UBAC2	438.298	-0.572602	6.72074e-05	0.00268639
IGLV2-14	107.672	-4.06976	6.73723e-05	0.00268823
TMBIM1	968.681	-1.10419	6.82146e-05	0.0027063
VLDLR	338.021	-2.12189	6.82944e-05	0.0027063
DAPK1	1059.65	-1.23305	6.88768e-05	0.00271739
HCFC2	605.5	-0.51909	6.89911e-05	0.00271739
TJP2	409.52	-1.54665	7.04847e-05	0.00275402
GPR183	235.292	-1.19203	7.08434e-05	0.00276326
NANOGP1	2.83181	-4.04982	7.29676e-05	0.00282175
COL16A1	1176.7	-1.59299	7.37698e-05	0.00284303
RP11-779O18.2	4.40459	-3.05976	7.45963e-05	0.00285122
FRMD3	566.656	-1.29549	7.44572e-05	0.00285122
CHST3	839.129	-1.115	7.42488e-05	0.00285122
AHCYL1	2067.31	-0.763889	7.47604e-05	0.00285201
LIFR	2247.62	-1.45207	7.48883e-05	0.00285207
PTPN20A	80.7898	-3.60652	7.58058e-05	0.00287731
NFKBIA	1358.55	-1.15476	7.64731e-05	0.00289776
RNF139	740.567	-0.750542	7.70477e-05	0.00290977
PPP2R2A	625.698	-0.63702	7.73424e-05	0.00291603
GAS6	1116.85	-1.35717	7.93435e-05	0.00297657
CYP2W1	64.9054	-1.97551	8.0553e-05	0.00300696
SLC51B	31.187	-2.02524	8.21399e-05	0.00305409
NSDHL	335.673	-0.726486	8.28631e-05	0.00306437
SLC39A14	321.24	-1.68423	8.34094e-05	0.00307797
MIR651	4.83604	-3.00387	8.3857e-05	0.00308944
SLC35D1	493.608	-0.932458	8.51156e-05	0.00312054
PRDM1	176.879	-1.36663	8.69633e-05	0.00316516
SLC39A6	1576.57	-0.653334	8.82126e-05	0.00319262
DEGS1	472.092	-0.765557	8.98236e-05	0.00324054
CD109	360.984	-1.45412	9.12646e-05	0.00328204
RASGRF2	212.743	-1.26391	9.24234e-05	0.00329657
NCBP1	1382.25	-0.744133	9.25349e-05	0.00329657
SC5D	737.048	-0.820774	9.2428e-05	0.00329657
RP11-104O19.2	34.4224	-1.43582	9.19439e-05	0.00329657
ALDH3A2	2561.13	-1.088	9.23315e-05	0.00329657
ARID5B	753.263	-1.48695	9.35871e-05	0.00331289
LEMD3	1279.5	-0.613911	9.37361e-05	0.00331289
PTEN	3504.32	-0.627093	9.40328e-05	0.00331439
MRO	78.4568	-1.52899	9.51406e-05	0.00333642
PTPN3	303.397	-2.0571	9.71896e-05	0.00337681
CRTAC1	81.2239	-2.27011	9.89389e-05	0.00342705
SULF2	1157.87	-1.57374	0.000102262	0.00350984
FNIP2	631.343	-0.790447	0.000103109	0.00353354
LGI1	379.371	-3.10486	0.000103265	0.00353354
LCTL	13.2313	-1.68929	0.000103488	0.00353583
RP11-124N2.1	3.17224	-2.77433	0.00010379	0.00354078
CHORDC1	1004.57	-0.748676	0.000105308	0.00358175
GNA13	1152.97	-0.562612	0.000106247	0.00360033
CDC42	1239.34	-0.664301	0.000107587	0.00363191
DYNC1I1	127.848	-2.3964	0.000111691	0.00373694
TRPC1	651.475	-0.920892	0.000112369	0.00375406
TNFAIP3	447.235	-1.51037	0.000113423	0.00378368
TFRC	1306.03	-0.808508	0.000113937	0.0037867
CPEB2	621.086	-1.08956	0.000113755	0.0037867
HSPA1A	1272.6	-1.61864	0.000116005	0.00383021
CHP1	375.844	-0.66571	0.000116508	0.00383561
SCARNA8	374.068	-2.0457	0.000120679	0.00394415
C5AR2	8.96748	-2.38526	0.000120633	0.00394415
PREPL	2676.7	-0.576202	0.000121281	0.0039581
MAMDC2	275.004	-1.85819	0.000123714	0.00401923
RGS1	378.453	-1.70696	0.000124252	0.00401928
SCN9A	178.871	-2.30247	0.000124516	0.00401928
HSPA1B	1984.62	-1.38672	0.000124844	0.00401928
ADRBK2	379.394	-1.07078	0.000124073	0.00401928
PYGB	1582.56	-0.915519	0.000127145	0.00406721
SRPX2	294.102	-1.58514	0.000127869	0.00408457
RP11-585F1.10	6.89074	-3.28178	0.000128871	0.00410496
C1orf87	117.473	-3.76572	0.000130505	0.00414532
CAMLG	318.516	-0.598715	0.000131863	0.00417671
SYNM	2025.38	-1.56476	0.000132624	0.00419493
EFCAB11	178.644	-1.22428	0.000137069	0.00431737
TM9SF2	2316.97	-0.714958	0.000138695	0.0043625
GPR34	63.5542	-1.32215	0.000139031	0.004367
PLP1	870.909	-2.77314	0.000139498	0.00436953
RASGEF1A	108.322	-1.88428	0.000147452	0.00458685
KCNA1	305.951	-4.06716	0.00014842	0.00460428
BMS1P20	2.50887	-2.29912	0.00014841	0.00460428
PAX2	24.0486	-4.14845	0.000149957	0.00464559
RGS16	141.176	-1.63838	0.000150908	0.00466225
RNF141	306.225	-0.923096	0.000151941	0.00468137
LBR	1039.02	-0.891651	0.000155313	0.00476575
TNFRSF11B	514.989	-1.87842	0.000156452	0.00479417
C9orf43	62.7256	-1.82875	0.000161613	0.00493227
ZDHHC20	452.847	-0.788963	0.000165292	0.00502756
GINM1	562.624	-0.685393	0.000168996	0.0051161
MDH1	1168.38	-0.58721	0.000170632	0.00515638
PIP4K2A	246.132	-1.11547	0.00017184	0.00516632
CX3CL1	175.47	-1.47207	0.000172967	0.00518762
CDK17	1013.64	-0.582338	0.000175583	0.00523136
MLF1	641.299	-1.18162	0.000176763	0.00525266
ATP5C1	965.281	-0.656298	0.000177531	0.00526855
USH1C	687.161	-2.62119	0.000180059	0.00532257
CHKA	1171.69	-0.9298	0.000180637	0.0053327
UBE2E2	126.763	-1.10043	0.000181166	0.00533436
TARSL2	461.02	-0.678366	0.000181041	0.00533436
RTN4	3688.9	-0.836132	0.000183505	0.00538502
PSME3	762.375	-0.469047	0.000184542	0.00539858
RNF19A	1442.07	-1.01766	0.000189531	0.00552304
LONRF1	396.595	-0.852192	0.00019565	0.00565762
ERCC6	1805.12	-0.786191	0.00019488	0.00565762
SMOC1	1988.01	-1.79234	0.000195122	0.00565762
CIRH1A	1572.4	-0.53861	0.000195652	0.00565762
MIR135A2	17.7796	-2.23073	0.000202423	0.00580143
FN1	18168.3	-1.25529	0.000203428	0.00581369
RP11-701P16.2	20.0041	-1.95649	0.000205177	0.00581706
SYTL2	413.821	-1.44445	0.000205153	0.00581706
KLF2	70.4826	-1.43615	0.000205426	0.00581706
HMGB1P10	38.0026	-1.40086	0.000204402	0.00581706
CALCOCO2	902.343	-0.629207	0.000208064	0.00587594
ZNF562	891.616	-0.581383	0.000208145	0.00587594
FAM177A1	588.151	-0.654644	0.000211875	0.00596633
ARHGEF10	1737.61	-0.867615	0.000213677	0.00600462
AL139147.1	1.94498	-2.10654	0.000216027	0.00606056
COX6A1P2	49.3722	-1.03629	0.000218908	0.00612617
BCAP29	290.512	-0.835493	0.000219243	0.00612796
PTP4A1	803.536	-0.870629	0.000221475	0.00615984
PPP1R15A	403.175	-0.992624	0.000222588	0.00618318
GAD1	736.698	-1.74172	0.000222969	0.00618617
DUSP5	48.0465	-1.88025	0.000224072	0.00619832
CNTN1	654.174	-2.61976	0.000224231	0.00619832
GLRA4	7.20306	-3.44734	0.000223951	0.00619832
TTBK2	2393.2	-0.436155	0.000226161	0.00622881
FEM1C	608.171	-0.619089	0.000229681	0.0063027
CCNH	741.93	-0.711662	0.000230472	0.00631674
RAB10	553.606	-0.505622	0.000233097	0.0063732
CALM2	1965.99	-0.749174	0.000243407	0.00658604
RPL36AP41	23.6741	-1.38544	0.000243181	0.00658604
NFATC1	789.78	-0.985205	0.000248706	0.0067026
IL1RAP	175.035	-1.90991	0.000253618	0.0068025
TSPAN6	472.469	-0.945162	0.000259805	0.00692732
PCDHGA1	69.7128	-1.89407	0.000265068	0.00703442
LRRC19	121.687	-1.48466	0.000266847	0.00705855
TMEM41B	219.446	-0.837861	0.000266356	0.00705855
EIF4A2	3012.83	-0.741459	0.000268667	0.00708829
AP4E1	633.037	-0.547049	0.000268458	0.00708829
DNAH10	743.572	-2.13107	0.000270001	0.00711517
PCSK5	399.447	-1.16316	0.000275733	0.00723246
RPL21P134	20.6429	-1.60361	0.000276076	0.00723306
FAM132B	31.2427	-2.23535	0.000277069	0.00725066
AREG	13.3466	-3.83739	0.000277556	0.00725502
NPM1P8	19.7857	-2.57474	0.000279674	0.00729347
SRGN	379.001	-1.41174	0.000280351	0.0073027
MYO6	4229.67	-0.878243	0.000288612	0.00748337
KLHL7	1658.48	-0.770382	0.000289774	0.00749628
CMC2	147.5	-0.688006	0.000291859	0.00753027
RP11-290L1.4	38.8734	-1.26556	0.000295325	0.00756191
THBS2	391.196	-1.31391	0.000297404	0.00759792
UGCG	315.834	-0.986854	0.000298238	0.00760204
PLCXD3	8.38353	-3.22413	0.000298642	0.00760376
SLC9A8	549.66	-0.593916	0.000305508	0.00772426
DOCK11	576.018	-1.13781	0.000308558	0.00776163
SGPP1	111.254	-0.855191	0.000310347	0.00779629
ANKRD36BP2	69.8744	-2.12156	0.000312172	0.00781373
SEPT7P6	72.6909	-0.986793	0.000311567	0.00781373
RMI1	239.307	-0.994679	0.000312037	0.00781373
GBP2	641.556	-1.60645	0.000314084	0.0078398
FLT1	1368.82	-0.932752	0.000320412	0.0079344
DAGLA	345.179	-0.925757	0.000321531	0.00794255
FERMT2	834.959	-0.766024	0.000322147	0.00794255
ARHGAP31	996.975	-1.02546	0.000327758	0.00805451
TMEM237	706.054	-0.631896	0.000331187	0.00808597
NPAP1	2.11168	-3.9368	0.000335031	0.00815015
HOMER1	232.368	-1.22563	0.000340654	0.00825383
CAMK2A	222.208	-2.56846	0.000340972	0.00825383
ADAM10	2217.52	-0.525089	0.000340986	0.00825383
SGIP1	500.762	-1.14137	0.00034486	0.00833868
CFL2	1328.67	-0.834915	0.000349127	0.00840044
C17orf104	26.9353	-1.12489	0.000348435	0.00840044
OSBPL9	1252.38	-0.654735	0.000351243	0.00842129
LDHA	4992.46	-1.45153	0.000351633	0.00842129
PPP3CC	401.657	-0.83934	0.000353195	0.00844974
HGD	53.1893	-2.0553	0.000355892	0.00848768
HBA2	1093.05	-1.94453	0.000355845	0.00848768
DCAF17	1925.97	-0.674439	0.000357246	0.00851059
CACNA1E	588.447	-1.96544	0.000373511	0.00880214
STOM	1490.11	-1.20689	0.000372547	0.00880214
AC007292.3	4.43679	-1.7572	0.000373184	0.00880214
SMDT1	120.451	-1.02425	0.000373771	0.00880214
VPS26B	319.404	-0.574877	0.000384265	0.00898368
IFNGR1	901.976	-0.727468	0.000385234	0.00899703
MIR320C1	11.468	-2.01427	0.000389025	0.00906681
HNRNPA3P7	49.9739	-1.47072	0.0003904	0.00908948
TTLL4	2495.3	-0.756844	0.000398577	0.00923226
SSTR2	117.137	-1.79785	0.000408675	0.0093796
RBBP4P1	38.5308	-1.53723	0.00041209	0.00943879
C1orf162	171.475	-1.29975	0.000416721	0.00951589
RER1	843.883	-0.439663	0.000421082	0.00959607
PPP1R2	403.546	-0.531597	0.000428825	0.00973326
ALPK2	82.2821	-3.23593	0.000432684	0.00979139
RLF	1460.73	-0.540125	0.000437163	0.00986795
SPNS2	295.007	-1.57434	0.000437429	0.00986795
CCDC103	5.51239	-2.70775	0.000438531	0.00986795
NEDD4	318.589	-1.07626	0.00044963	0.0100739
CDC37L1	279.853	-0.863117	0.000452272	0.010113
OMG	354.417	-1.10245	0.000458078	0.0102024
TNKS2	2322.02	-0.549001	0.000463717	0.0102874
VPS8	2226.49	-0.516445	0.000464652	0.010298
FAS	2481.47	-1.3976	0.000466717	0.0103235
C19orf12	609.868	-0.699592	0.000471111	0.0104004
GADD45B	86.7895	-1.83553	0.000472289	0.0104162
SIDT2	1304.34	-0.566474	0.000484055	0.0105929
C15orf65	86.2644	-1.20593	0.000486625	0.0106389
SLC39A12	40.3007	-3.34651	0.000489574	0.010693
TEX2	732.237	-0.60072	0.000491332	0.0107003
ARPC3P1	81.2193	-1.08045	0.000496146	0.0107787
CHAT	344.648	-2.99681	0.000507745	0.0109143
REEP3	456.226	-0.67301	0.000507922	0.0109143
PPP3CA	649.3	-1.02043	0.00051208	0.0109588
ARSB	320.936	-0.905794	0.000514338	0.0109588
NRBP2	792.347	-1.13191	0.000513479	0.0109588
TBC1D15	1237.19	-0.554329	0.00051505	0.0109588
GLIPR1	104.08	-1.32491	0.000516511	0.0109588
LGALS7B	2.53423	-4.14855	0.000513675	0.0109588
FAM83D	148.089	-1.2081	0.000511274	0.0109588
COL4A6	557.156	-1.47789	0.000523565	0.0110565
TLR2	274.616	-1.26685	0.000528756	0.0111498
PRPS1	822.46	-0.68195	0.00052951	0.0111553
ACKR3	87.4485	-1.51014	0.000530045	0.0111561
PTPRC	1273.59	-1.31469	0.000536066	0.0112285
PRUNE2	1074.41	-1.57322	0.000536467	0.0112285
PPL	877.675	-1.87594	0.000535073	0.0112285
CYP4B1	8.75306	-4.97093	0.000540645	0.011295
CTD-2349P21.9	37.9091	-1.31794	0.000542533	0.0113031
APOD	679.946	-2.1315	0.000545221	0.0113382
TSGA13	8.8493	-1.84782	0.000553151	0.0114609
SGK1	664.68	-1.24348	0.000559599	0.0115521
OR2H2	15.2806	-2.38412	0.000560157	0.011553
SLC51A	23.5172	-1.01104	0.000561657	0.0115734
IGLV2-11	91.5017	-3.69561	0.00056383	0.0115909
ELL2	463.644	-1.45856	0.000565121	0.0115919
IGHG1	2535.28	-3.01578	0.000565079	0.0115919
CPEB4	884.17	-0.656747	0.000585814	0.0119297
SEMA5A	1080.97	-1.50195	0.000587497	0.0119532
CTGF	508.73	-1.50564	0.000589257	0.0119674
MYH9	12395.3	-0.931687	0.000588971	0.0119674
CALM2P2	59.0558	-1.13657	0.000593509	0.0120193
PLEKHM1	1691.22	-0.598062	0.000601151	0.0121326
SSUH2	5.79653	-2.51256	0.000607697	0.0122319
LYVE1	93.2812	-1.68839	0.000630362	0.0125983
GCOM1	2.65694	-2.87893	0.000637538	0.0127192
LASP1	356.601	-0.650504	0.000639354	0.012733
UBE2G1	232.687	-0.684371	0.000645793	0.0128047
IFNAR1	625.538	-0.62535	0.000645661	0.0128047
SGSM1	301.039	-1.88295	0.000645518	0.0128047
SCN4B	422.845	-1.46835	0.000650506	0.0128756
PITPNM3	184.942	-1.46882	0.000654712	0.0129361
CFH	1222.14	-1.48149	0.000655858	0.0129475
PPA1	803.995	-0.735385	0.000671304	0.0131947
ITGB1	2875.49	-0.77275	0.000676347	0.0132362
ATXN7	1109.63	-0.697017	0.000677056	0.0132386
OTUD4	1123.32	-0.407661	0.000683126	0.0133227
PLEKHG3	588.526	-0.909633	0.00069264	0.013485
RGCC	196.885	-1.11487	0.000699125	0.0135761
RP11-507E23.1	21.1099	-1.54507	0.00070773	0.0137006
GCSAM	6.35642	-2.75446	0.000713528	0.013774
NFATC2	462.757	-1.17741	0.000717774	0.013843
EGR1	3028.85	-1.59532	0.00071984	0.013851
PLCD3	1227.23	-1.33127	0.000721368	0.013865
DNAJC6	257.504	-1.54666	0.00072804	0.0139294
LRRC39	46.9285	-0.996547	0.000735243	0.0140243
DPY19L3	1099.65	-0.654634	0.000737521	0.0140558
FAM219A	161.058	-0.726095	0.000741604	0.0141113
ALG2	866.562	-0.840459	0.000741679	0.0141113
ZDHHC3	538.793	-0.629274	0.000742337	0.0141119
NDUFAF1	399.367	-0.512764	0.000744357	0.0141384
RP11-121G22.3	10.8565	-2.5819	0.000749067	0.014204
MAT2A	2296.54	-0.603157	0.000750788	0.0142062
RP11-521J5.1	16.6508	-1.64566	0.000760667	0.0143756
SERPIND1	196.373	-1.12177	0.000761312	0.0143758
C1orf198	545.986	-0.956013	0.000771902	0.0145151
ENPP2	569.647	-1.52208	0.000777293	0.0145877
CTC-428H11.2	82.4155	-1.12356	0.000787028	0.014706
MIR1200	4.90772	-2.18709	0.000786037	0.014706
CLN8	276.818	-0.919959	0.000799529	0.0148492
FGL2	408.189	-0.944545	0.000801924	0.0148744
WDR11	3126.88	-0.459422	0.000805233	0.0149183
TSC22D3	209.429	-1.14738	0.000806673	0.0149327
CCDC54	13.1459	-2.12645	0.000810941	0.0149871
PROS1	234.409	-1.07475	0.00081765	0.0150864
REL	378.955	-0.927605	0.000845691	0.0154483
CLDND1	874.163	-0.771747	0.00085066	0.0154483
ARMC8	982.072	-0.473754	0.0008464	0.0154483
MFSD1	1118.35	-0.752629	0.000848561	0.0154483
GUCY1B3	305.35	-1.09559	0.000846063	0.0154483
RP11-40C6.2	35.4735	-1.2352	0.000849151	0.0154483
ORM1	15.9433	-2.97089	0.000847329	0.0154483
XYLT1	270.042	-1.44523	0.000846143	0.0154483
CSRNP1	227.208	-1.10808	0.000868291	0.0157127
FAM196B	24.3178	-1.86561	0.000869453	0.0157212
RP11-529H20.3	29.2031	-0.946375	0.000874679	0.0157778
ZNF654	363.745	-0.790912	0.000893272	0.0160363
FILIP1L	407.76	-0.872302	0.00089459	0.0160472
TNNT1	206.996	-3.85652	0.000912157	0.0162863
NAMPTL	149.6	-1.61963	0.000932489	0.0165822
CCNY	756.233	-0.503285	0.000938522	0.0166632
TWSG1	335.66	-0.762655	0.000944828	0.0167488
IRX1	82.3659	-3.84009	0.000948659	0.016778
GRIA4	287.156	-2.29339	0.000948872	0.016778
ACAT1	828.711	-0.619837	0.000962406	0.0169299
HIPK3	4723.35	-0.748874	0.000965981	0.0169496
PTENP1	78.1116	-1.30628	0.000967874	0.016954
PLP2	587.055	-0.781694	0.000975149	0.0170587
FAM126A	460.656	-0.989468	0.000976965	0.0170772
ZNF606	800.092	-0.592604	0.000985241	0.0171953
ZNF273	1602.2	-1.16882	0.000998216	0.017368
PNPLA8	787.348	-0.515387	0.00100051	0.0173946
SKAP2	140.88	-1.39754	0.00100218	0.0173968
KIAA2026	2386.34	-0.618427	0.00100195	0.0173968
ATF3	337.985	-1.82118	0.00100297	0.0173971
SPAG16	693.217	-0.831069	0.00100699	0.0174401
PPP1R3B	97.0843	-1.62602	0.00100632	0.0174401
CSMD3	1340.44	-1.92653	0.00101278	0.0175269
IL3RA	794.797	-1.04931	0.00101468	0.0175329
LMBRD1	2391.56	-0.766711	0.00102058	0.017581
TOB1	733.055	-0.708999	0.00102	0.017581
GALNT15	237.214	-1.45516	0.00102536	0.0176231
MIR765	28.3411	-1.4007	0.00102721	0.0176415
PDE4DIP	6754.31	-0.833683	0.0010338	0.0177276
CCDC90B	461.951	-0.617133	0.00103698	0.0177419
PICALM	3965.77	-0.564596	0.00104229	0.0178191
KCNMA1	928.319	-1.41282	0.00105463	0.0179622
APMAP	978.266	-0.603823	0.00105976	0.0180358
COMP	4501.54	-2.91116	0.00106704	0.0181188
MTX2	357.976	-0.588215	0.00107518	0.018216
LAMA2	4020.39	-1.42687	0.00108108	0.0182612
DGKG	108.224	-2.02837	0.00108353	0.0182752
KIT	205.288	-1.2579	0.00108712	0.0183083
DCP2	635.677	-0.48381	0.0010868	0.0183083
COL4A5	4963.58	-0.881447	0.00109043	0.0183504
RYBP	345.194	-0.741954	0.00109559	0.0184236
EIF2S2P4	36.5731	-1.2281	0.00110049	0.0184922
NFX1	1556.39	-0.511852	0.00110148	0.018495
RPS4XP5	2.21647	-2.93542	0.0011084	0.0185835
SERPINA12	8.8887	-2.9642	0.00111185	0.0186137
MYNN	293.466	-0.62387	0.0011132	0.0186225
RBPMS	279.725	-1.07853	0.00111896	0.0186913
SNORA14A	73.9773	-1.25761	0.00112821	0.0188206
GSN	6862.4	-1.22783	0.0011316	0.0188206
RP11-297M9.1	2.41983	-3.78955	0.00113989	0.018915
ABCE1	606.364	-0.556611	0.00114598	0.019002
DPYS	9.48489	-2.13175	0.00115683	0.0191399
HRASLS5	13.0058	-2.4372	0.00116059	0.019188
RFK	129.253	-0.824216	0.00116677	0.0192588
HABP2	91.6732	-2.7298	0.00116743	0.0192588
NT5C3AP1	6.80333	-1.49321	0.00117961	0.0193851
TMEM33	692.61	-0.618114	0.00118628	0.0194283
PPME1	594.428	-0.475273	0.00118733	0.0194309
DIMT1	413.631	-0.526669	0.0012011	0.0196073
RTN3	1414.09	-0.77473	0.00120245	0.0196073
WEE1	855.832	-0.906881	0.00121257	0.0197361
NMT1	792.709	-0.49475	0.00121258	0.0197361
CTD-2054N24.2	16.6858	-1.97072	0.00121637	0.0197629
NCALD	291.811	-1.49787	0.00122879	0.0199504
PDE1C	227.619	-1.19626	0.00123933	0.020107
VDAC2	406.282	-0.541146	0.0012436	0.0201619
PIGN	841.389	-0.574541	0.00124585	0.0201838
UBA6	1716.27	-0.43716	0.00124886	0.020218
MTIF3	311.55	-0.468774	0.00125348	0.0202784
MIR28	4.37722	-2.6152	0.0012553	0.0202932
RP11-350N15.4	16.9457	-1.33588	0.0012584	0.020317
CTD-2230M5.3	2.89525	-4.3032	0.00125857	0.020317
SSFA2	2279.65	-0.665384	0.00126436	0.0203668
STK24	867.812	-0.486033	0.00126532	0.0203678
CD55	423.504	-1.09979	0.00126873	0.0203801
ACTA2	828.941	-1.06843	0.00126942	0.0203801
NPM1P18	2.95323	-2.24046	0.00127784	0.0204818
MSMO1	257.463	-0.772323	0.00130213	0.0207532
PAPPA	302.578	-1.59559	0.00130187	0.0207532
NFKB1	642.456	-0.614496	0.0013163	0.0209035
RSU1	300.518	-0.666574	0.00132162	0.0209035
RP11-680F20.5	13.286	-3.3149	0.00131987	0.0209035
PRIMA1	8.68808	-1.6548	0.00132373	0.0209057
RPL26P35	11.4122	-1.58921	0.00134009	0.0211045
RPL7AP6	71.1924	-1.30527	0.00135293	0.0211743
ASCC1	1472.63	-0.485741	0.00135683	0.0212207
PGM1	626.416	-0.851705	0.00135942	0.0212274
AC018867.1	15.9978	-1.6437	0.00136109	0.0212285
PRKCQ	77.7745	-1.59328	0.00136599	0.0212756
HES1	300.975	-0.806023	0.00136934	0.0212908
GRHL3	155.351	-2.07572	0.00137612	0.0213597
PSME4	2594.35	-0.450883	0.00138284	0.0213625
IGKV1-39	9.29879	-4.7898	0.00138293	0.0213625
DNAJA4	324.325	-1.03471	0.00140521	0.0216328
TAGLN	335.822	-1.18204	0.00140705	0.0216463
SPRY2	1139.25	-0.866989	0.00140819	0.0216476
SUCLA2P3	27.6593	-1.53668	0.0014113	0.0216674
COL27A1	641.785	-1.56657	0.00141317	0.0216814
SPDYE8P	8.44417	-2.46361	0.00142709	0.0217929
RP11-1407O15.2	682.614	-0.571695	0.00142785	0.0217929
AGPS	1330.57	-0.47893	0.00143293	0.0218264
ITM2C	468.557	-1.20513	0.00143928	0.0218739
STXBP1	1384.33	-0.98444	0.00144766	0.0219129
TMED7	91.3564	-1.11482	0.00145915	0.0220572
GNB4	413.454	-0.687989	0.00146227	0.0220895
CACNA1A	239.112	-2.18714	0.00147832	0.0222724
TNFSF13B	54.618	-1.41307	0.00148062	0.0222922
KCTD9	254.421	-0.770163	0.00149968	0.0225042
RP13-93L13.2	62.7908	-1.06865	0.00149845	0.0225042
CTB-54D4.1	54.4263	-0.985477	0.00150567	0.0225641
LAMP2	1074.28	-0.730486	0.00150472	0.0225641
FAM161A	930.867	-0.617671	0.00151083	0.0225664
BEST1	414.312	-1.04938	0.00150968	0.0225664
POLR3B	784.19	-0.454376	0.00150819	0.0225664
LRRTM2	322.123	-0.727661	0.00152612	0.02266
OR1N2	4.24951	-2.42434	0.0015396	0.0228002
ASTN2	966.395	-1.10772	0.0015429	0.0228341
EEF1A1P6	32.5192	-1.172	0.00154831	0.0228903
SLC44A1	1270.32	-0.775654	0.00154956	0.0228903
RP11-345J4.8	267.756	-0.713592	0.00155526	0.0229317
SNORA35	18.4178	-4.49507	0.0015566	0.0229317
ACTA2-AS1	17.9583	-2.14357	0.00156018	0.0229694
IGHV3-23	27.5796	-3.02864	0.00156303	0.0229964
MAGEH1	198.561	-0.736488	0.00156624	0.0230136
TBC1D31	459.407	-0.721703	0.00156735	0.0230149
MFAP3	262.416	-0.499992	0.00157719	0.0231293
SEC62	2039.62	-0.685171	0.00158761	0.0232621
TFCP2L1	16.7531	-2.0374	0.00159073	0.0232676
CSNK1A1P1	7.94469	-1.78595	0.00159409	0.0233016
FAM8A1	264.475	-0.601222	0.00159948	0.0233025
HNRNPA1P33	25.2706	-2.07553	0.00160551	0.0233626
HSPD1P6	4.62854	-2.03896	0.00161018	0.0234004
DOCK5	573.997	-1.62183	0.0016127	0.0234069
RP11-114M5.1	265.755	-0.906022	0.00161672	0.0234352
PAK1IP1	233.244	-0.628458	0.00163993	0.0236864
SMAD3	1240.49	-0.786681	0.00164116	0.0236864
DGKK	2.79033	-3.6613	0.00164589	0.0237331
CD82	714.73	-1.21773	0.00164935	0.0237557
PIK3CA	1028.93	-0.537976	0.00165354	0.0237865
NBEA	4436.58	-0.650173	0.0016743	0.0239622
CDR1	49975	-1.79018	0.00167015	0.0239622
VPS13A	4152.31	-0.805171	0.00167651	0.0239787
RPL27	1828.97	-0.698143	0.00167876	0.0239847
ACO1	657.126	-0.560235	0.00168996	0.0240906
ZNF672	362.882	-0.721775	0.00169665	0.024114
CHI3L1	1248.09	-2.72105	0.00170441	0.0241938
ABI3BP	1056.26	-1.98095	0.00170709	0.0242166
SESN1	732.303	-0.571258	0.00171411	0.0242858
CDS1	208.391	-1.37711	0.00172442	0.0243707
NUPL1	1144.36	-0.460644	0.00172795	0.0243795
PPIF	136.246	-0.927772	0.00174288	0.0245241
ZFAND5	1073.97	-0.694685	0.00174509	0.0245399
TMCO1	2037.76	-0.718956	0.0017627	0.0247722
GRAMD3	807.501	-1.20743	0.00176774	0.0248037
NBEAL1	1672.33	-0.490214	0.0017724	0.0248312
IGFL2	3.75823	-3.30028	0.00177697	0.0248798
RP11-366M4.1	9.24171	-1.87042	0.00178917	0.0250196
RARS	1210.24	-0.522211	0.00179618	0.0251021
MAP3K8	300.356	-0.942724	0.00180035	0.0251137
EXT2	1407.91	-0.489975	0.00179939	0.0251137
RPL5P32	2.11175	-2.58024	0.00180213	0.0251169
FMR1	2561.85	-0.724301	0.0018028	0.0251169
KDM3A	2257.36	-0.503907	0.00182001	0.0253099
ZMAT4	28.3591	-2.36963	0.00185018	0.0256461
ATP11B	1499.68	-0.645844	0.0018607	0.025733
C7orf66	3.52714	-3.71783	0.00186494	0.0257759
RP11-680F20.6	21.94	-2.62105	0.00189744	0.0260655
CMBL	218.095	-0.925767	0.00190277	0.0261056
RP11-741G21.1	22.954	-1.38952	0.00190434	0.0261056
SNORD12	36.1861	-1.12504	0.00190666	0.0261128
CYP20A1	551.427	-0.49464	0.00194063	0.0264978
WTAP	735.905	-0.524252	0.00194742	0.0265087
DTNA	4053.4	-1.21484	0.00194678	0.0265087
EIF4E2P1	5.44669	-1.64757	0.00194702	0.0265087
CTD-2547L24.3	7.42007	-2.45253	0.0019539	0.0265664
NT5C1A	2.69689	-2.68953	0.00196189	0.026579
SNED1	2164.47	-1.9118	0.00195888	0.026579
VSNL1	172.733	-1.64306	0.00197171	0.0266323
SELT	360.395	-0.641909	0.00196921	0.0266323
UBAP2	1295.65	-0.486097	0.00196951	0.0266323
CDH19	10.7068	-3.22548	0.00199733	0.0269299
ATF7IP2	196.696	-1.19505	0.00200439	0.0270091
IRX2	84.8121	-3.30951	0.00201004	0.0270567
ADAMTSL3	151.635	-1.61606	0.00202766	0.0271928
COMMD3	132.622	-0.715809	0.00203684	0.0272997
HIF3A	598.259	-1.83326	0.00204718	0.0273895
CD44	2675.03	-1.24764	0.00206092	0.0274919
RPL34	2206.48	-0.798895	0.00207084	0.0275917
CTD-2611K5.5	133.472	-1.6441	0.0020724	0.0275931
DNAJB11	561.754	-0.584686	0.00207921	0.0276143
CSGALNACT2	654.559	-0.628737	0.00208295	0.0276389
USP15	1103.82	-0.416909	0.00210198	0.0278288
HMGN1P2	1.86772	-2.80398	0.00210219	0.0278288
RAD23B	1485.48	-0.507453	0.00210602	0.0278631
ACTR10	828.881	-0.506745	0.00211202	0.0279099
CYP27A1	224.863	-0.820655	0.00211536	0.0279212
NEB	1563.46	-1.11895	0.00212003	0.0279502
MTMR2	1147.85	-0.519627	0.00216198	0.0283708
SLC7A2	96.8942	-1.75689	0.00216893	0.0284304
EXT1	1338.78	-0.545735	0.00216904	0.0284304
NEU3	171.603	-0.65854	0.00217293	0.0284484
IDI1	262.576	-0.780954	0.00219043	0.0286112
GOLGA1	657.969	-0.425819	0.00219857	0.0287009
HNRNPA1P42	22.2706	-2.73268	0.00220474	0.0287648
RP11-551L14.1	26.2256	-2.10543	0.00221233	0.0288471
IL1RL1	22.542	-2.30082	0.0022236	0.0289201
RP11-6O2.3	2.74784	-2.06872	0.0022256	0.0289201
C17orf80	575.576	-0.509707	0.00222796	0.028934
SPARC	5008.33	-0.854748	0.00224785	0.029139
CATSPERD	38.5967	-1.94792	0.00224656	0.029139
EFR3A	1104.97	-0.55233	0.00225072	0.0291458
ZFP36	872.338	-1.28539	0.00226863	0.0293105
SLC25A36	447.859	-0.627194	0.00227582	0.0293697
KRT75	916.466	-2.8293	0.00229347	0.0295636
SNHG5	88.975	-1.12662	0.00229795	0.0295695
FGFBP3	33.4327	-1.62895	0.00230042	0.0295695
LRRC70	116.685	-0.990851	0.00230359	0.0295929
CEBPG	155.94	-0.819223	0.00231881	0.0297376
POLB	337.571	-0.693582	0.00232622	0.0298011
OR13C8	3.78321	-2.35296	0.0023264	0.0298011
SNORA23	1422.4	-1.00887	0.00233504	0.0298948
CHRM3	17.5296	-1.97771	0.00235069	0.0300294
SLC26A2	722.453	-0.89837	0.0023522	0.0300294
PFKFB3	2022.58	-0.930832	0.00234878	0.0300294
ZC3H14	3077.15	-0.425501	0.00235134	0.0300294
OTOG	31.2308	-3.15186	0.00236226	0.0301238
FOSL2	393.233	-1.21897	0.00236434	0.0301333
SNX29	2013.28	-0.496915	0.00238233	0.0302942
GYG2	78.5387	-1.89281	0.00238652	0.0303133
RP11-680H20.1	20.5212	-1.12865	0.00238912	0.0303294
LDHAL6B	48.2359	-1.26724	0.00239334	0.0303658
C11orf16	22.3968	-1.78615	0.00239794	0.03039
MYOM1	186.953	-0.973157	0.00240607	0.030476
ARHGAP18	714.855	-0.746314	0.00242174	0.0306058
SNORD3B-1	153.059	-1.2777	0.0024278	0.0306653
DYSF	668.189	-0.834709	0.00243472	0.0307355
CCNL1	1248.4	-0.632084	0.00244044	0.0307904
TXNL1	780.58	-0.567951	0.00244894	0.0308804
ZCCHC7	536.232	-0.623221	0.00245252	0.0309083
LGR6	41.1562	-2.86159	0.00245882	0.0309704
ATP5A1P3	2.52432	-1.78669	0.00246292	0.0309875
CDC5L	1399.54	-0.419425	0.00246723	0.0310231
COX20P2	2.82168	-2.77554	0.00247444	0.0310805
ELMO1	386.084	-0.909123	0.00249112	0.0312205
TBC1D4	631.237	-0.904204	0.00249777	0.0312523
ENTPD6	467.411	-0.495438	0.0025003	0.0312661
WWC1	895.89	-1.42564	0.00251029	0.0313738
ATP6V1E1P1	1.59844	-2.45346	0.00251551	0.031413
UTP18	499.078	-0.472805	0.00251621	0.031413
CNIH1	293.155	-0.608697	0.00252361	0.0314879
RBP2	97.9206	-1.08813	0.00252668	0.0314938
PCNPP5	19.0178	-1.3308	0.00252686	0.0314938
SNORA13	193.968	-1.44643	0.0025386	0.031583
THBD	95.2143	-1.72324	0.00253753	0.031583
CD46	2759.42	-0.652614	0.00257448	0.0318587
LRRC37A6P	325.429	-1.08828	0.00257251	0.0318587
RAPGEF5	286.751	-0.989783	0.00258894	0.031985
RP11-159G9.5	129.534	-0.753979	0.00259367	0.0320113
MUT	960.566	-0.386827	0.0025939	0.0320113
AP2S1	219.278	-0.616747	0.00259786	0.0320427
CCDC25	400.398	-0.542512	0.00261136	0.0321565
ABCB1	1073.07	-1.2601	0.00263411	0.0323637
RP5-1073F15.1	2.73997	-2.62664	0.00263375	0.0323637
ALOX15B	28.6111	-2.26781	0.00264591	0.0324757
MIR644A	50.5312	-1.564	0.0026525	0.0325389
RNF182	152.635	-1.08984	0.00267963	0.0328004
B4GALT5	587.331	-0.521972	0.00267949	0.0328004
ZBTB21	503.839	-0.447864	0.00268158	0.0328065
RINL	15.6149	-1.0194	0.00268554	0.0328372
MIR590	29.4254	-1.25625	0.00269155	0.0328654
SHROOM4	858.551	-0.825848	0.00269218	0.0328654
RCN2	642.281	-0.565052	0.00270246	0.0329015
EMC2	567.68	-0.565607	0.00270714	0.0329408
RAPGEF4	342.799	-1.3342	0.00271512	0.0329668
APTX	733.002	-0.552689	0.00271448	0.0329668
RCVRN	6.03369	-1.98186	0.00271242	0.0329668
C1orf228	142.752	-1.01988	0.00272246	0.0330382
DCUN1D4	491.162	-0.583458	0.0027346	0.0331084
GCM2	81.7479	-1.67419	0.00274912	0.0331842
SNRPGP1	2.91942	-2.29459	0.00274773	0.0331842
MEF2C	502.824	-0.787569	0.00276872	0.0333664
RASSF2	211.726	-1.05356	0.00277255	0.0333948
MRPL3	605.311	-0.618844	0.00277739	0.0334353
SNORA36B	11.4326	-1.53228	0.00279762	0.0335892
UBE2D1	183.502	-0.729972	0.00281528	0.0337344
UQCRFS1	328.019	-0.501699	0.00281829	0.0337478
PPP5C	905.776	-0.454995	0.00282418	0.0337824
GATSL3	4.66428	-1.38799	0.00285476	0.0340387
ARNTL	337.475	-0.573125	0.00287373	0.0342019
CLDN19	8.97586	-2.6259	0.00288438	0.0342939
ANKRD28	1499.78	-0.54825	0.00289187	0.0342939
RPF2	342.724	-0.514535	0.00289059	0.0342939
PRCP	695.628	-0.600605	0.00288809	0.0342939
DKK1	58.8848	-2.53763	0.00291361	0.0345176
RP11-30K9.1	6.68193	-1.88855	0.00292712	0.0345924
VCL	3828.95	-0.646419	0.00292942	0.0346014
GAS7	696.842	-0.909482	0.00293196	0.0346133
C11orf74	138.299	-0.73687	0.0029393	0.0346495
CACNG3	2.97003	-4.73607	0.002939	0.0346495
SAMHD1	1881.96	-0.865775	0.00294538	0.0346992
ZNF800	434.668	-0.503414	0.00296306	0.0348349
ASNSD1	422.005	-0.531103	0.00300121	0.03521
FAM114A2	559.944	-0.455771	0.00301692	0.0353576
MBOAT2	478.174	-0.683846	0.0030311	0.0354269
AC018463.4	63.3613	-0.946245	0.00303198	0.0354269
AC092964.1	18.3223	-1.19378	0.0030364	0.0354269
SLC12A2	1304.97	-0.618866	0.00303342	0.0354269
SOD2	1775.52	-1.24328	0.00303852	0.0354269
USPL1	781.022	-0.580478	0.00302549	0.0354269
CYLD	1126.95	-0.543388	0.00305274	0.035556
DCAF12	496.139	-0.455765	0.00305831	0.0355957
DPYSL2	4235.1	-0.834147	0.00306665	0.0356628
TNFRSF10B	3131.05	-0.722399	0.00306895	0.0356712
ABCA13	1328.53	-2.10205	0.00307393	0.0357108
MMP19	63.1454	-1.87967	0.00310149	0.0360124
MYO16	121.708	-2.11547	0.00311503	0.036151
NRD1	3368.04	-0.452316	0.00312282	0.0362228
DNAJB9	267.719	-0.89753	0.00313706	0.036332
SNORD115-42	18.1238	-2.223	0.00314942	0.0364336
MYH15	149.74	-1.4955	0.00315875	0.0365083
TMOD2	255.594	-0.899952	0.00316396	0.0365294
RPS6KA3	1138.87	-0.79599	0.00316543	0.0365294
EGR3	74.2234	-1.9616	0.00316971	0.0365602
FBXO32	467.494	-1.57097	0.00318111	0.0366729
C5AR1	95.0537	-1.49993	0.00318389	0.0366862
C1orf141	88.8896	-2.19679	0.0031873	0.0367068
RP11-26H16.1	26.3219	-1.54906	0.00319353	0.0367411
CAP2	311.475	-0.935963	0.00322048	0.0369946
NTRK2	7686.5	-0.968049	0.00326347	0.0373744
MIR575	11.7553	-1.08624	0.00328168	0.0375258
TTF1	422.378	-0.517784	0.00329249	0.0376304
MCAM	395.549	-0.83734	0.00330267	0.0377085
PIK3R1	2395.79	-0.791517	0.0033348	0.0380369
CCDC110	69.439	-1.3068	0.00336817	0.0383401
SLC1A1	839.798	-1.17737	0.00338117	0.0384687
ADAMTS4	54.7818	-1.11202	0.00340017	0.0386653
SUPT3H	257.771	-0.834622	0.00340257	0.0386732
PHACTR3	58.9919	-2.13493	0.00340869	0.0387232
HBB	2648.79	-1.6036	0.00341653	0.0387582
CD83	92.2771	-1.24224	0.00342133	0.0387888
ANTXR1	5003.42	-0.630115	0.00346419	0.0391763
S100A2	69.7372	-1.77269	0.00347917	0.0392868
IRF8	183.802	-1.27477	0.0034769	0.0392868
PHOSPHO2	115.62	-0.72121	0.00348103	0.0392881
RP11-90O23.1	17.8417	-1.41751	0.00349274	0.039381
AGTPBP1	1151.37	-0.702181	0.00350102	0.0394546
AC090616.2	32.3812	-1.09485	0.00350794	0.0395128
AGT	895.993	-1.72291	0.00351984	0.0396272
SIPA1L2	1564.09	-0.904277	0.00354167	0.0398133
NDRG2	1104.05	-1.08913	0.00355388	0.0399307
PLA2G1B	6.3482	-2.01565	0.00356337	0.0400174
PRKRIR	395.33	-0.72951	0.00357011	0.0400733
RRAGA	467.76	-0.586388	0.00357848	0.0401472
INSIG1	221.819	-0.720019	0.00358201	0.0401668
ANLN	431.711	-1.1395	0.00359049	0.0401862
MIR603	8.46819	-2.52305	0.00359085	0.0401862
RP4-566D2.1	41.8446	-1.20726	0.00359658	0.0402165
ESD	794.79	-0.514329	0.00359712	0.0402165
ING3	367.999	-0.566986	0.00364395	0.0406595
PDC	61.4717	-1.15376	0.00365867	0.0407612
KLHL24	940.324	-0.519995	0.00366028	0.0407612
ABHD13	180.791	-0.684416	0.00366984	0.0408475
TBC1D19	885.242	-0.506692	0.0036718	0.0408489
MTSS1	2623.66	-0.929629	0.00370651	0.0411543
SNORA14B	441.143	-1.18401	0.00371213	0.0411964
PUS3	114.398	-0.573333	0.00372376	0.0412646
MBP	586.724	-2.16279	0.00373837	0.041386
NTM	293.184	-1.19843	0.00375659	0.0415063
DDX6P1	2.40705	-3.42358	0.00376218	0.0415477
KIAA0513	152.055	-0.95443	0.00376956	0.0416088
AC068587.1	5.81059	-2.45682	0.0037747	0.0416452
RP11-493E3.1	2.6615	-1.88896	0.00378318	0.0417105
SYCP2	146.014	-1.1619	0.00378431	0.0417105
PNP	194.472	-0.803121	0.00378937	0.0417328
TEX11	3.6792	-4.02322	0.00379003	0.0417328
AKR1C1	121.617	-1.9219	0.00380021	0.0418041
UBLCP1	482.392	-0.470915	0.00382912	0.0419995
RP11-727A23.5	10.1153	-1.41586	0.00382774	0.0419995
BAALC	111.16	-1.57574	0.00383208	0.0420115
UGP2	726.94	-0.484867	0.00383518	0.0420123
CTD-3185P2.1	15.2634	-1.40483	0.0038403	0.0420201
IFT122	3273.5	-0.556582	0.00385305	0.0421187
HNRNPA1P15	47.4533	-0.922022	0.00385913	0.0421647
MYO9A	1885.32	-0.533292	0.00389711	0.0424156
BCAR3	467.766	-0.755752	0.00391688	0.0425692
NAV2	3140.61	-0.741717	0.00393018	0.0426932
GLO1	833.069	-0.482842	0.00393826	0.0427604
KRBOX4	226.056	-0.49832	0.00394609	0.0428248
ERP44	561.412	-0.614007	0.0039626	0.0429215
CTGLF12P	1483.85	-1.16354	0.00396245	0.0429215
ELP2	2578.88	-0.496673	0.00398954	0.0431099
C3orf49	32.9852	-1.20838	0.00399345	0.0431109
SETP6	6.06348	-2.1486	0.0040148	0.043235
ITIH2	103.264	-1.25858	0.00401616	0.043235
ERGIC2	559.895	-0.5455	0.00401643	0.043235
PPP4R2	555.349	-0.551917	0.00403135	0.0433543
MICAL2	491.218	-1.0821	0.00404754	0.0434371
TXN	640.689	-0.86261	0.00405162	0.0434481
CAAP1	199.234	-0.609765	0.00406494	0.0434699
STAMBPL1	103.759	-1.12756	0.00406446	0.0434699
EFCAB10	97.9104	-1.2539	0.00407368	0.0435275
ITGA1	1033.24	-0.780155	0.0040923	0.0436563
ORM2	25.0996	-1.99053	0.00409059	0.0436563
C17orf105	2.75679	-2.25063	0.00413626	0.0440421
LYRM5	39.7938	-1.05173	0.00414643	0.0441088
AQP11	47.4267	-1.08365	0.00414886	0.0441111
IRS2	1068.47	-0.755599	0.00415055	0.0441111
PKM	8553.57	-0.621496	0.00415294	0.0441157
KPNA3	751.643	-0.413395	0.00417535	0.0442913
UBE2Q2	461.798	-0.709394	0.0041804	0.044324
DRAM2	550.162	-0.544452	0.00419145	0.0443627
GPX3	763.056	-1.3666	0.00419191	0.0443627
CCDC126	103.615	-0.93921	0.00420174	0.0444043
CCDC82	1069.44	-0.580721	0.0042013	0.0444043
TCEAL6	33.4071	-2.19466	0.00419967	0.0444043
SNORD115-11	13.5156	-3.25976	0.00420421	0.0444096
CALM2P3	9.93253	-1.37221	0.00420947	0.0444444
MRPS22	340.587	-0.59885	0.00423263	0.0445031
RCL1	285.459	-0.631093	0.00422955	0.0445031
CAB39	406.153	-0.43655	0.00424146	0.0445739
FPR1	79.1587	-1.45593	0.00426777	0.044767
PTPN11	5516.39	-0.462392	0.0042912	0.0449501
RLIMP1	73.1007	-1.19421	0.00431793	0.0451464
ERCC6L2	1552.21	-0.509544	0.00432938	0.0452242
USP53	799.655	-0.902158	0.00435353	0.0454344
BATF3	4.54052	-1.8035	0.00436564	0.0455398
TRAM1	1349.18	-0.644442	0.00438148	0.0456839
UBE2D3P2	24.2734	-1.14064	0.00439064	0.0457583
ACBD5	2621.93	-0.650308	0.00442326	0.0459152
MAGED1	2666.53	-0.659388	0.00442244	0.0459152
USP32	1631.37	-0.390826	0.00444903	0.0461114
MAN1A2	2256.61	-0.50626	0.00445863	0.0461897
FCF1P3	8.38659	-1.71708	0.00447062	0.0462779
BEST2	4.9669	-1.81444	0.00447409	0.0462779
CTTNBP2NL	708.033	-0.471594	0.00448166	0.0463221
RNU4ATAC	158.856	-1.2289	0.00448835	0.0463701
IFITM5	3.13464	-2.07495	0.00449629	0.0464061
CHD1	2049.28	-0.455407	0.00454921	0.0467635
RNF34	686.716	-0.309649	0.00457423	0.0469779
U2SURP	2521.35	-0.45741	0.00458618	0.0470578
MSL2	998.945	-0.512262	0.00464925	0.0475538
ZSCAN4	1.70276	-2.56233	0.0046667	0.0476674
CAB39L	317.261	-0.732952	0.00468224	0.047783
DENND4A	2867.74	-0.631366	0.00471985	0.0480582
PARD3	1659.25	-0.54841	0.00479545	0.0485435
CLIC4	740.049	-0.701765	0.00480202	0.0485882
EDIL3	244.055	-1.57043	0.00480677	0.0486047
UBE2QL1	37.2802	-1.60741	0.00481807	0.0486529
UBE2R2	914.841	-0.53416	0.00482413	0.0486529
AC007421.1	7.0608	-1.46542	0.00481968	0.0486529
STT3A	1902.58	-0.501364	0.00483379	0.0486698
SIRPA	1024.84	-0.79364	0.00483333	0.0486698
SPATA7	1129.45	-0.595772	0.00485702	0.0488166
ZC3H15	596.478	-0.458762	0.00486986	0.0489239
XPA	701.176	-0.640969	0.00489593	0.0490767
TMEM217	10.5018	-1.26509	0.00490232	0.0490971
RIOK3	506.122	-0.441529	0.00491256	0.0491779
KIAA1377	2484.88	-1.0444	0.00492348	0.0492653
PLAT	104.354	-1.16593	0.00493588	0.0493676
FOLH1	99.7201	-1.31244	0.00494157	0.0493807
ANKRD13C	610.477	-0.460832	0.00495924	0.0495353
CAP1	1083.12	-0.485901	0.00498769	0.0496144
S100A10	178.461	-1.45869	0.00498061	0.0496144
STK17A	244.074	-0.725334	0.0049819	0.0496144
PTGR1	331.761	-0.614827	0.00499149	0.0496144
RPS24	10829.7	-0.719738	0.00499223	0.0496144
CALM1	2044.05	-0.599808	0.00496984	0.0496144
TTC19	3431.02	-0.603034	0.00497287	0.0496144
TRIM47	111.738	-1.04863	0.00499351	0.0496144
SMOC2	89.4397	-1.18635	0.00499727	0.0496299
ITFG1	1289.11	-0.406935	0.00501374	0.0497279

## Sheet: Cluster 3
Gene	baseMean	log2FoldChange	pvalue	padj
CPED1	387.401	-4.35769	7.41762e-19	1.6295e-14
KCP	129.799	-5.14692	5.6768e-18	6.2354e-14
HSD17B1	10.7674	-5.4939	3.51495e-15	1.54433e-11
WNT16	17.2551	-5.54809	1.95932e-14	6.14003e-11
UBE2V1	19.4682	-3.0379	2.23599e-14	6.14003e-11
RPL21P75	16.4687	-4.09985	3.47237e-14	8.47568e-11
ATF7	40.4172	-2.90637	9.83186e-14	2.15986e-10
IGF1	48.849	-3.7401	1.30471e-13	2.60562e-10
RPL37A	6069.3	-2.96567	4.2484e-13	7.7774e-10
PPT2-EGFL8	11.5276	-5.07805	5.54918e-13	9.37726e-10
THBS4	304.346	-2.87536	1.14839e-12	1.80199e-09
RP11-61I13.3	14.3725	-5.29428	1.99783e-12	2.74303e-09
KANK4	53.2894	-6.6761	2.25111e-12	2.90897e-09
PPAN	9.15741	-4.58497	5.4282e-12	6.27614e-09
CTSK	812.981	-2.59405	6.45239e-12	6.57333e-09
RPL37	4456.32	-2.72109	6.15837e-12	6.57333e-09
SLC6A4	18.4942	-4.71384	6.58291e-12	6.57333e-09
RP4-798P15.3	18.8614	-4.70042	6.9841e-12	6.67073e-09
PCTP	46.8918	-2.07138	7.85809e-12	7.19277e-09
PDE5A	1058.69	-2.43272	9.49331e-12	7.82674e-09
RP11-983P16.4	18.371	-3.31728	9.17908e-12	7.82674e-09
EGFL8	10.6899	-3.49225	1.20683e-11	9.46848e-09
ERP27	18.09	-3.73576	1.27108e-11	9.62864e-09
RPL37AP1	9.62471	-3.70601	1.41233e-11	1.0342e-08
MINOS1	36.7797	-2.77963	1.56472e-11	1.08301e-08
RNF144B	184.698	-2.52373	1.65884e-11	1.08301e-08
LINC00987	4.54855	-6.10333	1.71864e-11	1.08301e-08
MMP2	1040.2	-3.62812	1.64272e-11	1.08301e-08
MRPL38	15.9897	-3.17079	1.77477e-11	1.08301e-08
ZNF788	21.2057	-3.67281	1.76363e-11	1.08301e-08
DDX50P2	5.00171	-4.90128	2.00001e-11	1.18747e-08
TM9SF1	8.86792	-5.12547	2.28659e-11	1.32189e-08
RASSF8-AS1	8.09144	-5.20967	2.45982e-11	1.35093e-08
RP11-174G6.5	11.8811	-4.68262	2.7521e-11	1.47459e-08
LY6G5B	8.29847	-4.01004	3.07793e-11	1.6099e-08
ARL6IP4	6.91297	-4.22386	3.16513e-11	1.61701e-08
PCDH18	368.054	-2.43678	3.50288e-11	1.74889e-08
POLR2J4	28.0754	-3.13506	4.19969e-11	2.00394e-08
RP11-452L6.5	10.2572	-3.48473	4.28738e-11	2.00394e-08
TMEM154	30.9102	-4.19389	4.43832e-11	2.03127e-08
TBC1D10A	30.0504	-2.91291	4.9106e-11	2.20155e-08
GREM2	8.18176	-6.70033	5.26302e-11	2.31236e-08
RP11-561C5.5	9.11778	-7.65157	6.18367e-11	2.66359e-08
MYCBP	13.2361	-4.17162	6.62189e-11	2.74471e-08
HNRNPA1P30	3.11781	-5.54713	6.59983e-11	2.74471e-08
TOMM5	13.126	-5.43293	7.16346e-11	2.9142e-08
APITD1	5.90518	-5.33919	7.34544e-11	2.9339e-08
RPL30	1371.45	-2.47894	7.61492e-11	2.98722e-08
ZNF571-AS1	13.5195	-3.66445	8.09326e-11	3.11917e-08
KRTCAP2	21.8036	-3.20361	8.52705e-11	3.17495e-08
CRAMP1L	42.6129	-2.63919	8.51675e-11	3.17495e-08
IPO4	17.0764	-3.32887	8.92326e-11	3.2671e-08
MYBPC2	13.1702	-5.23706	1.01232e-10	3.58689e-08
RPL35A	3747.21	-2.76322	1.10829e-10	3.8646e-08
FTCD	94.3104	-3.35789	1.36109e-10	4.67195e-08
KIAA0391	6.36474	-6.14535	1.65755e-10	5.51711e-08
C12orf57	246.643	-1.92706	1.71529e-10	5.62411e-08
TMA7	54.3858	-4.23957	1.81736e-10	5.87114e-08
LY75	22.209	-4.85108	1.87233e-10	5.8759e-08
EMILIN3	12.9284	-4.95503	1.84634e-10	5.8759e-08
PINK1-AS	16.1354	-3.28062	2.41188e-10	7.22836e-08
AC018865.8	14.3222	-9.12093	2.3627e-10	7.22836e-08
STK32B	48.8773	-3.58646	2.4678e-10	7.22836e-08
ZNF259P1	11.7553	-4.32019	2.44535e-10	7.22836e-08
RPL39	587.554	-2.53998	2.38315e-10	7.22836e-08
RP11-195F19.30	7.38609	-4.87203	2.69678e-10	7.79512e-08
MAGED4	10.384	-4.95954	2.83091e-10	8.07655e-08
RP11-46A10.5	5.62082	-4.57686	2.92632e-10	8.14107e-08
LUM	535.766	-4.83228	3.00176e-10	8.14107e-08
RPL23A	1918.97	-2.68642	2.99552e-10	8.14107e-08
AC115618.1	7.1568	-3.09523	2.94788e-10	8.14107e-08
CTD-3018O17.3	12.2569	-3.69604	3.06703e-10	8.21665e-08
HNRNPA1P20	7.0673	-5.8862	4.25399e-10	1.12592e-07
GPR84	17.1169	-3.50691	4.77328e-10	1.24833e-07
KB-1208A12.3	10.764	-2.95198	4.88816e-10	1.26333e-07
SPECC1L	22.1293	-3.74484	5.00945e-10	1.27962e-07
DDX47	19.1438	-3.44898	5.73829e-10	1.44895e-07
AF131216.6	23.8081	-2.86231	5.84902e-10	1.46013e-07
DHRS4-AS1	8.90542	-4.48854	6.25461e-10	1.52668e-07
RP11-114H24.5	8.8108	-4.36159	6.25453e-10	1.52668e-07
RP11-282K24.3	11.2743	-5.06073	6.45615e-10	1.55856e-07
JMJD7-PLA2G4B	24.2764	-3.56528	6.7672e-10	1.61589e-07
RP11-315I20.1	8.74251	-4.18676	6.98369e-10	1.64098e-07
CAPN11	9.32915	-4.08931	7.61904e-10	1.74349e-07
ZNF804B	13.9713	-4.21611	8.01879e-10	1.81605e-07
CASC15	33.4598	-3.75619	8.21137e-10	1.84069e-07
C1orf127	6.4266	-6.02701	8.52366e-10	1.89139e-07
MARVELD1	16.0626	-3.31828	8.79692e-10	1.91337e-07
RP5-1000K24.2	8.44469	-3.32528	8.7562e-10	1.91337e-07
ACSM3	35.6557	-2.34122	9.24474e-10	1.99106e-07
ALKBH6	14.0302	-3.45258	9.62003e-10	2.05177e-07
AP000974.1	7.05431	-3.68768	1.02564e-09	2.16646e-07
RP11-517I3.1	4.50652	-4.31255	1.20294e-09	2.49303e-07
TIMP3	1184.65	-2.76305	1.21841e-09	2.50149e-07
RP11-421F16.3	6.37735	-4.20366	1.26601e-09	2.56055e-07
PCID2	526.716	-1.26332	1.328e-09	2.60478e-07
NME1-NME2	22.8473	-3.69543	1.31898e-09	2.60478e-07
LYPD3	6.52507	-4.25915	1.32036e-09	2.60478e-07
FAM109B	7.38586	-4.06499	1.36607e-09	2.65574e-07
RPS23	2639.13	-2.33352	1.41532e-09	2.72735e-07
PKD1L3	110.636	-1.8547	1.44092e-09	2.75253e-07
MRPS31P5	7.35987	-5.63328	1.49202e-09	2.80142e-07
RP11-649A18.7	3.64407	-4.75405	1.48104e-09	2.80142e-07
ANO9	67.483	-4.24868	1.62425e-09	3.02386e-07
FLT3LG	6.00886	-5.03188	1.73712e-09	3.20682e-07
RPL22	1866.8	-2.27943	1.79893e-09	3.29324e-07
TFPI	108.052	-2.6389	1.85876e-09	3.37465e-07
FAM178B	8.54407	-5.04761	1.92338e-09	3.46334e-07
CASP14	5.90661	-6.86467	1.9906e-09	3.55525e-07
FAM229A	7.67945	-3.85043	2.01354e-09	3.56721e-07
OR2M2	9.55019	-8.50648	2.12746e-09	3.68867e-07
ACOXL	16.5583	-4.00226	2.14926e-09	3.68867e-07
ABCF2P1	4.0403	-4.6939	2.11817e-09	3.68867e-07
RPL27	2511.63	-2.31974	2.14473e-09	3.68867e-07
RPLP2	1751.18	-2.08134	2.25975e-09	3.81862e-07
EIF3LP1	4.35079	-4.8932	2.25281e-09	3.81862e-07
CD302	15.5481	-3.31843	2.3218e-09	3.83499e-07
TMPPE	33.6825	-1.90015	2.31202e-09	3.83499e-07
RPS18	5268.75	-2.21796	2.3081e-09	3.83499e-07
FKBP7	81.0793	-1.97217	2.35591e-09	3.86229e-07
ARHGEF18	20.5212	-3.40308	2.39401e-09	3.89568e-07
RP11-507M3.1	4.30833	-5.65123	2.45708e-09	3.94521e-07
OLFML1	72.8497	-2.55529	2.46037e-09	3.94521e-07
RP4-756G23.5	5.72751	-4.56917	2.51572e-09	4.00473e-07
C12orf60	17.4255	-3.18906	2.60479e-09	4.11669e-07
WFDC2	15.1282	-5.22486	2.80862e-09	4.40713e-07
MOB4	12.8664	-3.87956	2.85959e-09	4.43634e-07
MYLPF	2.59811	-4.77916	2.86763e-09	4.43634e-07
DUOX1	426.001	-2.54959	2.99875e-09	4.57477e-07
GIPC2	14.9778	-3.69115	3.16221e-09	4.79086e-07
PAM16	6.0554	-4.33755	3.42954e-09	5.16028e-07
SLC23A3	29.0701	-2.97893	3.77472e-09	5.49277e-07
ZAN	26.7024	-3.59728	3.77553e-09	5.49277e-07
CYSLTR1	16.1397	-3.6486	3.70272e-09	5.49277e-07
RPL36A	24.1915	-2.74939	3.74853e-09	5.49277e-07
POMC	4.29831	-3.94289	3.87858e-09	5.60557e-07
RPS27	3432.3	-2.47725	3.92584e-09	5.63678e-07
BMP5	137.597	-6.81161	3.99171e-09	5.69415e-07
CLDN4	15.2998	-4.33965	4.16448e-09	5.90228e-07
IL10RB-AS1	5.96531	-3.88885	4.20921e-09	5.92744e-07
FAM195B	11.4629	-3.73387	4.38723e-09	6.13877e-07
WAC-AS1	6.72646	-4.57393	4.5762e-09	6.36265e-07
AC074091.13	7.86187	-4.75928	4.61651e-09	6.37834e-07
BIVM	23.0023	-2.94969	4.72088e-09	6.48176e-07
AC022154.7	3.38115	-4.23594	4.75752e-09	6.4915e-07
RP11-176H8.1	13.7778	-3.49224	4.90783e-09	6.61443e-07
AC025165.8	6.98496	-4.39991	4.9499e-09	6.63046e-07
ACTRT3	10.362	-2.96154	5.20285e-09	6.88532e-07
COL6A3	5044.93	-4.67796	5.28008e-09	6.94568e-07
HIST1H4E	1506.95	-2.61266	5.4935e-09	7.18341e-07
HMGN3-AS1	7.15694	-4.23722	5.69088e-09	7.39747e-07
RPL41P1	15.4557	-9.12393	5.76736e-09	7.45278e-07
SCAND2P	25.3456	-2.72488	5.83923e-09	7.50153e-07
RP11-386I23.1	7.04126	-4.97029	5.92511e-09	7.5676e-07
RPP21	6.13546	-3.67325	5.99673e-09	7.59242e-07
MIR497HG	16.4777	-2.97647	6.01366e-09	7.59242e-07
RAB3B	25.6658	-5.80333	6.28737e-09	7.87382e-07
CEP57L1P1	3.04877	-4.22857	6.30824e-09	7.87382e-07
ANKRD34B	8.75824	-5.07588	6.46958e-09	8.02959e-07
ISM1	81.082	-3.74463	6.53587e-09	8.06629e-07
CNIH3	19.9849	-3.61177	6.61236e-09	8.1151e-07
C9orf170	6.69948	-5.0201	6.93552e-09	8.46442e-07
AGAP2-AS1	4.35625	-4.35322	7.45842e-09	9.05229e-07
MGAT2	6.03506	-4.93343	7.63119e-09	9.16076e-07
PTGIR	8.93343	-4.18154	7.61779e-09	9.16076e-07
PRMT8	17.2751	-4.52289	7.67381e-09	9.16186e-07
RP11-586K2.1	6.13173	-5.51667	7.839e-09	9.3053e-07
NAALADL1	25.6929	-3.24087	7.87867e-09	9.3053e-07
DPP4	83.0491	-3.47744	8.55255e-09	9.91684e-07
FAM66C	9.68793	-5.52346	8.57702e-09	9.91684e-07
CTD-2555K7.4	5.2549	-5.61941	8.44448e-09	9.91684e-07
DUOX2	124.138	-4.91166	8.57372e-09	9.91684e-07
NBPF8	36.591	-3.73536	8.95708e-09	1.0279e-06
RNF125	19.2106	-3.93756	8.98385e-09	1.0279e-06
ZNF677	163.111	-1.6503	9.6653e-09	1.09447e-06
HNRNPA1P39	2.67158	-4.34067	1.0618e-08	1.19618e-06
LOXHD1	32.7224	-4.7878	1.08174e-08	1.21243e-06
MAGEL2	5.982	-4.57312	1.09755e-08	1.2239e-06
HNRNPA1P4	4.26201	-2.91124	1.12274e-08	1.24567e-06
C9orf85	68.3891	-1.68067	1.2022e-08	1.31393e-06
N6AMT1	70.2466	-1.48899	1.19639e-08	1.31393e-06
FAM47A	8.53758	-7.80739	1.19545e-08	1.31393e-06
ZBED3-AS1	11.6199	-5.62187	1.22581e-08	1.3331e-06
AIRE	15.3032	-3.46582	1.26351e-08	1.36733e-06
GNAI1	204.809	-1.44089	1.29194e-08	1.39124e-06
CTB-13H5.1	11.0411	-2.19267	1.30097e-08	1.39414e-06
RP11-1114A5.4	7.86104	-4.05032	1.31392e-08	1.40117e-06
RPS29	2136.09	-2.1715	1.32882e-08	1.41022e-06
RNF152	39.2328	-2.98705	1.37596e-08	1.45323e-06
C1QL3	12.3662	-5.24259	1.39556e-08	1.46688e-06
C9orf106	8.52135	-3.86499	1.48779e-08	1.54899e-06
RPL41	1634.21	-2.17713	1.52515e-08	1.5804e-06
CLIC5	14.8429	-4.21294	1.53321e-08	1.58129e-06
MESP2	7.53529	-4.98204	1.56291e-08	1.6044e-06
MLK4	23.8802	-3.95104	1.59141e-08	1.62605e-06
RPL31	4136.12	-2.02136	1.62725e-08	1.6323e-06
CRHBP	9.84197	-4.47913	1.62094e-08	1.6323e-06
PRR15	4.03235	-5.38798	1.60835e-08	1.6323e-06
PROSER2	12.5222	-3.78922	1.70137e-08	1.69889e-06
AC007161.5	3.75403	-4.14605	1.73766e-08	1.72729e-06
ARL17B	19.4863	-2.65778	1.77358e-08	1.75505e-06
RP11-66N24.3	8.31353	-4.20059	1.84584e-08	1.81836e-06
SETP18	4.21226	-3.06901	1.94565e-08	1.90812e-06
IKBKG	29.3138	-3.05128	1.96169e-08	1.91531e-06
CHRNA5	10.9075	-4.22012	2.0318e-08	1.97498e-06
TMEM41A	62.9733	-1.96961	2.0603e-08	1.97958e-06
RP11-383H13.1	23.3683	-3.76263	2.06356e-08	1.97958e-06
FAM27D1	4.80327	-5.41824	2.06129e-08	1.97958e-06
PRSS42	21.3757	-2.78917	2.12043e-08	2.01665e-06
GATC	15.5268	-2.50788	2.12975e-08	2.01665e-06
P2RX5-TAX1BP3	16.8817	-3.80294	2.12479e-08	2.01665e-06
RP11-589F5.4	2.28876	-5.12833	2.15646e-08	2.03318e-06
MYADML2	6.0456	-4.40774	2.18826e-08	2.05434e-06
SLC26A8	20.0068	-3.26156	2.25148e-08	2.1047e-06
RPL38	1335.96	-1.91245	2.32089e-08	2.15206e-06
CTAGE1	12.198	-3.99353	2.32174e-08	2.15206e-06
KCNJ9	9.58514	-4.49469	2.33619e-08	2.15637e-06
VTCN1	5.35397	-6.31997	2.37017e-08	2.17857e-06
RP11-261C10.3	5.01642	-4.72003	2.41093e-08	2.19764e-06
UNC93A	22.5679	-10.0021	2.40815e-08	2.19764e-06
C1orf220	6.91635	-4.34208	2.42995e-08	2.20583e-06
NUFIP1P	3.28152	-4.88578	2.45858e-08	2.21353e-06
OVOL1	13.0215	-4.27111	2.45065e-08	2.21353e-06
KCNS1	12.2047	-4.23559	2.46897e-08	2.21381e-06
MRPL53	3.4017	-4.36441	2.56561e-08	2.28092e-06
UBE2W	64.3172	-2.01638	2.57496e-08	2.28092e-06
CTD-2162K18.5	3.98764	-4.03986	2.56394e-08	2.28092e-06
GIMAP1	16.9201	-3.1677	2.61467e-08	2.30679e-06
TRIM7	17.2111	-4.38508	2.69057e-08	2.36426e-06
RARG	110.377	-2.80636	2.70592e-08	2.36827e-06
FBXO48	22.7107	-2.83962	2.80866e-08	2.44844e-06
CNN2P9	4.37022	-2.83717	2.8448e-08	2.47014e-06
RP11-216L13.19	9.53968	-4.6873	2.98169e-08	2.57881e-06
RFX8	17.9904	-3.17624	3.04953e-08	2.61688e-06
PDGFRL	22.8973	-3.36518	3.04823e-08	2.61688e-06
C1RL-AS1	11.7489	-5.40285	3.22087e-08	2.75315e-06
TLR5	167.495	-2.49572	3.39841e-08	2.89365e-06
IGSF10	192.482	-2.68272	3.41824e-08	2.8993e-06
RP11-1186N24.5	9.49588	-3.813	3.54578e-08	2.99591e-06
ZSCAN16-AS1	6.76557	-3.52464	3.5786e-08	3.01205e-06
ATP1A1OS	14.5381	-2.3768	3.59847e-08	3.01722e-06
RP11-3P17.3	34.0319	-2.73637	3.64059e-08	3.03099e-06
MPZL3	28.5906	-3.27603	3.65697e-08	3.03156e-06
RPS7	4361.64	-1.85534	3.73225e-08	3.08233e-06
TFP1	5.26224	-4.63631	3.9036e-08	3.19979e-06
CLMP	48.4116	-2.55857	3.93579e-08	3.21418e-06
TEDDM1	10.0827	-3.65209	4.01034e-08	3.26048e-06
FHIT	33.9084	-2.2637	4.02217e-08	3.26048e-06
SIM2	23.7616	-3.60647	4.04529e-08	3.26717e-06
CD27-AS1	12.7967	-3.17669	4.13629e-08	3.32843e-06
PIP5KL1	14.3223	-2.96714	4.21894e-08	3.38254e-06
FKBP1B	3.73605	-5.00863	4.26309e-08	3.40551e-06
SESTD1	642.317	-1.41851	4.2904e-08	3.41491e-06
EGLN2	32.0526	-2.55691	4.37795e-08	3.46929e-06
TIMM10B	7.81176	-4.09842	4.45326e-08	3.50642e-06
ABHD16A	23.7403	-2.46652	4.55931e-08	3.5715e-06
L3MBTL3	341.946	-1.49313	4.58469e-08	3.5715e-06
EIF4A2P4	4.56905	-3.19647	4.58012e-08	3.5715e-06
AC068580.6	4.23035	-4.88272	4.69647e-08	3.64565e-06
SBF2-AS1	24.5813	-2.47554	4.80494e-08	3.71672e-06
CYGB	11.1652	-3.33352	4.91933e-08	3.79186e-06
MAGI2-AS3	23.2799	-4.28878	5.01202e-08	3.8498e-06
DCN	1313.43	-2.69177	5.07268e-08	3.88281e-06
AMDP1	2.14053	-4.62518	5.10449e-08	3.89359e-06
DNM1	907.161	-2.3549	5.56624e-08	4.23111e-06
SLC35A1	7.09459	-3.66369	5.59961e-08	4.2418e-06
CPZ	10.006	-6.76358	5.67425e-08	4.27952e-06
GAPDHP69	2.72793	-4.0461	5.68837e-08	4.27952e-06
AC022431.1	22.3445	-2.44163	5.92693e-08	4.44378e-06
RP4-657D16.3	5.4799	-3.60337	5.99581e-08	4.48013e-06
FAM47E	37.4032	-2.85056	6.03539e-08	4.49442e-06
B3GNT4	30.2976	-2.12092	6.11128e-08	4.53556e-06
RP11-183E9.2	3.34188	-5.69008	6.13343e-08	4.53668e-06
MAP2K4P1	14.1708	-2.61542	6.39713e-08	4.71584e-06
TM4SF19-AS1	4.19144	-5.3191	6.50287e-08	4.76248e-06
RBFOX2	1082.52	-1.36687	6.50375e-08	4.76248e-06
OIP5-AS1	34.555	-3.63716	6.55395e-08	4.78329e-06
MRPS18C	200.906	-1.65885	6.66212e-08	4.842e-06
LYRM4	162.252	-1.2748	6.71018e-08	4.842e-06
NDST2	21.3584	-2.83294	6.72256e-08	4.842e-06
CTD-3162L10.5	2.43028	-4.56198	6.70996e-08	4.842e-06
ARPC5	193.372	-1.46047	6.88855e-08	4.94535e-06
RPS15A	1796.36	-1.92885	6.99345e-08	5.00431e-06
GNG10	7.21931	-3.1177	7.04981e-08	5.02826e-06
RP1	221.882	-3.49987	7.38947e-08	5.23651e-06
RP11-488C13.5	4.13736	-4.61503	7.54872e-08	5.33216e-06
PTRH1	9.29442	-4.05882	7.92667e-08	5.54564e-06
GTSF1	7.99342	-3.93053	7.90956e-08	5.54564e-06
HK2P1	7.52077	-4.04261	7.90896e-08	5.54564e-06
PTRHD1	18.5433	-2.07399	7.96637e-08	5.55572e-06
CTD-3092A11.1	8.47023	-3.34538	8.02804e-08	5.58101e-06
RP11-196G18.22	8.44411	-5.67641	8.15491e-08	5.65133e-06
AC021860.1	9.15866	-2.94387	8.22043e-08	5.66463e-06
RP11-551L14.4	2.25518	-4.80572	8.22568e-08	5.66463e-06
LMNA	3442.41	-1.84391	8.40386e-08	5.76925e-06
ZNF284	9.74103	-5.09811	8.47754e-08	5.8017e-06
CHSY3	44.7992	-2.63247	8.59921e-08	5.86126e-06
C12orf76	43.7132	-2.12827	8.61793e-08	5.86126e-06
ZNF316	14.2129	-3.05512	8.77132e-08	5.91069e-06
SEC61G	335.15	-2.19545	8.75631e-08	5.91069e-06
EVPL	18.6566	-4.32511	8.72283e-08	5.91069e-06
FXYD7	5.77306	-4.60408	8.95882e-08	6.01858e-06
SLC6A10P	27.2545	-3.71324	9.01451e-08	6.03752e-06
DDTL	8.99157	-2.35578	9.11423e-08	6.08576e-06
C12orf40	8.84014	-6.17551	9.42908e-08	6.25794e-06
GEMIN7	7.14122	-3.14071	9.42633e-08	6.25794e-06
PET117	8.70859	-2.5569	9.54334e-08	6.3147e-06
RP11-496I9.1	5.52939	-4.549	9.58967e-08	6.3263e-06
DGCR9	5.02732	-5.01147	9.6388e-08	6.33967e-06
ATG9B	22.0539	-3.39419	9.84342e-08	6.42343e-06
RP11-262H14.1	5.86933	-5.51429	9.85024e-08	6.42343e-06
RP11-283I3.6	7.41658	-4.55595	9.99051e-08	6.47409e-06
RP5-1139B12.2	8.75152	-6.10851	1.00768e-07	6.51082e-06
RPS24P8	4.86853	-2.18346	1.01889e-07	6.54473e-06
CTA-85E5.10	3.61817	-4.25416	1.02506e-07	6.56519e-06
SLC22A18	25.0787	-2.81471	1.03322e-07	6.59821e-06
STX7	393.012	-1.17869	1.06932e-07	6.80896e-06
C4orf36	23.7472	-2.75179	1.07341e-07	6.8152e-06
ANO7	30.7914	-2.3501	1.09295e-07	6.91929e-06
AC118138.2	3.63204	-3.26489	1.11859e-07	7.06129e-06
RP4-717I23.3	11.7684	-4.21953	1.13715e-07	7.1334e-06
AC016725.4	2.80015	-4.44197	1.13784e-07	7.1334e-06
HNRNPA3P3	3.44116	-3.7892	1.13976e-07	7.1334e-06
PCOLCE	239.27	-2.61551	1.14863e-07	7.1685e-06
ABCC12	13.3913	-7.25972	1.15928e-07	7.19662e-06
HAUS6P2	3.75319	-26.2741	1.15969e-07	7.19662e-06
PCSK9	10.9954	-5.01914	1.17268e-07	7.25677e-06
ZNF286A	36.7442	-2.58732	1.17949e-07	7.27838e-06
LTB	7.61106	-2.85807	1.19116e-07	7.29687e-06
GVQW1	11.7883	-2.3819	1.19245e-07	7.29687e-06
AP001347.6	5.77891	-3.62636	1.18674e-07	7.29687e-06
CR2	9.27327	-5.8928	1.20515e-07	7.33584e-06
RP11-490H24.5	3.92981	-3.36006	1.24982e-07	7.56365e-06
OTOGL	34.2729	-3.02389	1.25878e-07	7.59697e-06
COL13A1	39.6524	-3.52215	1.29162e-07	7.77378e-06
AC093690.1	5.09101	-4.47387	1.3129e-07	7.88025e-06
RP11-195F19.5	3.4038	-5.94269	1.33673e-07	8.00145e-06
GPR157	19.3624	-3.39197	1.35209e-07	8.07136e-06
TFAP4	68.3812	-2.00615	1.37409e-07	8.18051e-06
AC005562.1	15.5191	-4.25894	1.3814e-07	8.20176e-06
PRSS36	13.9154	-2.9979	1.40786e-07	8.33636e-06
AC008277.1	6.92533	-2.70533	1.41295e-07	8.34398e-06
MAGOHB	107.677	-1.46595	1.43138e-07	8.43017e-06
RP11-482L11.1	2.78505	-5.31114	1.4402e-07	8.44584e-06
RP11-258C19.7	4.17717	-4.72154	1.44173e-07	8.44584e-06
ZNRD1	70.2556	-1.70154	1.47226e-07	8.60178e-06
TNFSF9	3.51639	-5.26978	1.49308e-07	8.70029e-06
UBA6-AS1	35.8093	-2.31217	1.56607e-07	9.10144e-06
HYPK	49.4201	-1.9858	1.5762e-07	9.13612e-06
ST13P19	4.23195	-3.02289	1.59148e-07	9.18292e-06
CALN1	19.3492	-5.67719	1.59564e-07	9.18292e-06
MIR4519	4.23149	-4.35834	1.59681e-07	9.18292e-06
SMIM7	49.2505	-1.85009	1.61184e-07	9.24513e-06
KLC3	10.6012	-3.78617	1.61733e-07	9.25247e-06
RPL34	2793.27	-2.05287	1.62735e-07	9.26157e-06
HSPA8P18	4.5782	-4.35684	1.64861e-07	9.34185e-06
PPT2	41.3631	-1.46009	1.64996e-07	9.34185e-06
AC007038.7	8.16059	-3.20548	1.67091e-07	9.43615e-06
RP11-124D2.7	7.00342	-3.15042	1.70642e-07	9.61195e-06
XKR5	11.9757	-5.05547	1.71745e-07	9.64937e-06
RP3-412A9.16	3.46881	-4.31944	1.76522e-07	9.89242e-06
ZNF33BP1	4.19617	-4.82141	1.8442e-07	1.03088e-05
HIST1H4B	358.563	-2.63285	1.85375e-07	1.03158e-05
FKBP14	98.7147	-1.36319	1.85956e-07	1.03158e-05
CTD-2517M14.5	7.5097	-4.68327	1.85708e-07	1.03158e-05
DACT3	54.874	-2.00864	1.87972e-07	1.04015e-05
FCER2	4.39699	-5.81387	1.89279e-07	1.04474e-05
ZNF33B	8.58654	-3.48897	1.9044e-07	1.04852e-05
RP11-262D11.2	17.943	-2.33934	1.92598e-07	1.05775e-05
RPL26	1407.61	-2.2412	1.94139e-07	1.06355e-05
RP11-12A20.7	12.1539	-2.91159	1.98283e-07	1.07499e-05
ZNF410	33.1914	-2.4433	1.98673e-07	1.07499e-05
AP001469.9	7.12763	-3.46073	1.97796e-07	1.07499e-05
SLC6A7	8.94517	-5.51851	2.05469e-07	1.10416e-05
PPTC7	99.9923	-1.35945	2.05572e-07	1.10416e-05
RPS7P1	47.1046	-1.68933	2.04736e-07	1.10416e-05
FAM110A	9.38407	-3.25288	2.0632e-07	1.10547e-05
RP11-30P6.1	4.52791	-3.70153	2.07116e-07	1.10704e-05
HPN	22.6015	-4.00319	2.08667e-07	1.11262e-05
TRIOBP	105.229	-2.06113	2.09442e-07	1.11405e-05
RP11-85K15.2	2.50992	-5.86822	2.12662e-07	1.12844e-05
TRAPPC2	104.165	-1.33749	2.153e-07	1.13422e-05
NIPAL1	17.5261	-3.87169	2.23023e-07	1.16374e-05
WHAMMP2	20.0934	-2.9149	2.22667e-07	1.16374e-05
METTL10	67.141	-1.61286	2.26644e-07	1.17984e-05
GNL3LP1	4.62668	-3.73243	2.29164e-07	1.19013e-05
ADI1	73.8727	-1.44461	2.35772e-07	1.22156e-05
MYLK4	25.4098	-2.76569	2.38408e-07	1.23232e-05
RPL27A	4690.91	-1.71954	2.40695e-07	1.24122e-05
IL22RA2	6.08176	-6.47249	2.42207e-07	1.24609e-05
DNAJC30	13.2517	-2.32717	2.4758e-07	1.26276e-05
MACROD1	30.3652	-1.91597	2.47747e-07	1.26276e-05
IFI30	10.0174	-3.52616	2.47679e-07	1.26276e-05
ASB15	6.78678	-5.04736	2.51698e-07	1.27403e-05
C10orf71	18.1346	-7.74711	2.51425e-07	1.27403e-05
SPATA9	13.5686	-2.73002	2.54481e-07	1.28221e-05
MAP3K14-AS1	11.7782	-4.00796	2.54055e-07	1.28221e-05
DCAF8	70.6903	-1.94721	2.56204e-07	1.28794e-05
KIAA1239	25.1321	-4.15157	2.5839e-07	1.29596e-05
AC046143.3	2.09656	-4.9509	2.6018e-07	1.29901e-05
CICP16	11.216	-2.96126	2.6169e-07	1.30358e-05
TRPM1	23.2162	-3.91629	2.64053e-07	1.31238e-05
RP3-368A4.5	10.7272	-3.85291	2.71224e-07	1.34498e-05
CRYZP1	3.00029	-3.6376	2.73793e-07	1.35466e-05
CTD-3232M19.2	8.62892	-4.6528	2.74726e-07	1.35622e-05
RP11-644F5.10	13.3043	-3.26555	2.75989e-07	1.3594e-05
RP11-288H12.3	19.4731	-2.54126	2.77439e-07	1.36113e-05
AC004490.1	4.94912	-5.98899	2.78199e-07	1.36113e-05
BCKDHA	14.3535	-2.86249	2.78002e-07	1.36113e-05
RP11-863P13.4	9.38802	-4.26532	2.8119e-07	1.37271e-05
RPL21P122	1.86529	-5.33041	2.81832e-07	1.37279e-05
ZHX1-C8ORF76	4.33923	-3.43186	2.85323e-07	1.38405e-05
TLDC2	12.177	-2.90464	2.85404e-07	1.38405e-05
AS3MT	6.00729	-4.21582	2.86099e-07	1.38436e-05
ZDHHC20P4	2.46878	-4.4915	2.89427e-07	1.39739e-05
SLC5A12	14.0694	-5.6858	2.94669e-07	1.41784e-05
COL1A1	30670.3	-3.82224	2.94954e-07	1.41784e-05
BTN1A1	10.5768	-3.82835	2.97153e-07	1.4253e-05
SLC6A19	37.6465	-8.09176	3.00514e-07	1.43515e-05
RP11-103C16.2	1.70444	-4.54	2.99972e-07	1.43515e-05
AP3S2	74.8255	-1.84872	3.0311e-07	1.44441e-05
AC012314.8	21.4287	-2.71371	3.09874e-07	1.47026e-05
BLOC1S5	20.3995	-2.31523	3.14768e-07	1.49026e-05
CLNK	14.0542	-4.47156	3.15568e-07	1.49084e-05
RPL15	1178.74	-1.42912	3.17034e-07	1.49455e-05
CREG2	16.6424	-5.62625	3.18636e-07	1.49889e-05
HTR4	13.3346	-5.63944	3.20124e-07	1.50267e-05
RP11-480A16.1	14.9778	-2.72037	3.23916e-07	1.51723e-05
VASH2	57.02	-2.97578	3.29748e-07	1.53693e-05
RP11-705C15.3	5.20042	-5.04478	3.29449e-07	1.53693e-05
ILF3-AS1	4.38227	-4.53913	3.30222e-07	1.53693e-05
RAD23BP1	3.75591	-3.57328	3.33674e-07	1.54971e-05
B3GNT7	15.0826	-3.03437	3.41915e-07	1.5813e-05
MORC1	7.80529	-5.02849	3.53106e-07	1.6269e-05
RP1-85F18.6	1.48715	-3.58054	3.53979e-07	1.6269e-05
MAP3K15	16.7355	-3.54992	3.53996e-07	1.6269e-05
ACSM1	11.4784	-3.29644	3.57455e-07	1.63937e-05
PTH2R	10.7646	-4.3352	3.62174e-07	1.65755e-05
BDH2	265.653	-1.2835	3.64164e-07	1.66319e-05
FAM89B	5.66469	-3.23866	3.65908e-07	1.66769e-05
RPL12P37	1.38502	-3.99387	3.74343e-07	1.7026e-05
AC079807.2	2.19	-4.25143	3.75336e-07	1.70359e-05
SAMD13	21.1753	-2.63814	3.7774e-07	1.71097e-05
NPM1P13	1.86954	-5.92459	3.79343e-07	1.71469e-05
RP11-211G3.2	1.4158	-4.36115	3.80712e-07	1.71735e-05
NPM1P46	3.27629	-3.1391	3.83531e-07	1.72299e-05
AACS	257.99	-1.2073	3.83444e-07	1.72299e-05
KCTD9P2	3.53792	-3.64657	3.91049e-07	1.75318e-05
HCG4P5	1.98513	-5.29939	3.96785e-07	1.7717e-05
ZNF625	4.34115	-6.44668	3.96793e-07	1.7717e-05
OR2T10	1.63551	-25.1358	4.00475e-07	1.77372e-05
AL133458.1	13.2389	-2.50002	4.00069e-07	1.77372e-05
SFXN2	112.761	-1.56618	3.98941e-07	1.77372e-05
CBX7	51.2271	-1.98783	3.99761e-07	1.77372e-05
CTB-152G17.6	6.43777	-4.28461	4.02637e-07	1.77971e-05
TTLL2	6.68712	-5.10221	4.23793e-07	1.86946e-05
IL27RA	19.4031	-2.30871	4.25141e-07	1.87164e-05
CHMP3	31.3933	-3.42196	4.28166e-07	1.87743e-05
LINC00641	12.8439	-4.49683	4.27547e-07	1.87743e-05
RP11-403I13.8	5.69112	-3.66354	4.37082e-07	1.90227e-05
HSPA12B	75.1061	-2.33814	4.35935e-07	1.90227e-05
SLC46A2	7.2022	-3.58789	4.39536e-07	1.90825e-05
SLC5A7	11.1628	-8.86077	4.42906e-07	1.91761e-05
APOOP5	1.98361	-5.34172	4.502e-07	1.94303e-05
ZNF192P1	6.12747	-4.35719	4.52871e-07	1.95072e-05
RP1-102E24.6	6.85634	-3.77644	4.54716e-07	1.95102e-05
GUCY2F	8.70526	-4.37707	4.54156e-07	1.95102e-05
RPS12	2369.2	-1.75962	4.58306e-07	1.96259e-05
ARHGEF19	25.0475	-3.15059	4.65501e-07	1.98566e-05
SLC12A8	56.0685	-2.26736	4.70624e-07	1.99974e-05
AP000442.1	2.1239	-4.18021	4.69985e-07	1.99974e-05
PCDH20	70.8981	-3.05678	4.84745e-07	2.05577e-05
C3orf35	21.0033	-2.31671	4.87657e-07	2.06017e-05
AC097662.2	15.3724	-2.96067	4.91967e-07	2.07041e-05
RP11-981G7.1	10.4326	-4.62432	4.9134e-07	2.07041e-05
AOC3	18.2621	-2.8754	4.93852e-07	2.07437e-05
RP11-448A19.1	14.988	-4.85016	4.96371e-07	2.08097e-05
AC092835.2	12.6723	-2.78833	4.97794e-07	2.08296e-05
SRP19	15.2874	-3.07585	4.98748e-07	2.08298e-05
PTMAP4	1.90705	-2.97918	5.01746e-07	2.09153e-05
AC110781.3	23.4266	-2.52769	5.14683e-07	2.14139e-05
FOXP1	584.43	-1.73734	5.21595e-07	2.16605e-05
CTC-820M8.1	4.24546	-4.41848	5.28892e-07	2.19221e-05
GABRR1	9.935	-4.25288	5.31711e-07	2.19974e-05
GHRLOS	6.21032	-3.05494	5.39022e-07	2.2258e-05
RP1-228P16.1	1.96964	-4.204	5.40951e-07	2.22893e-05
RP11-258C19.5	17.9303	-2.27962	5.41811e-07	2.22893e-05
KCNG3	12.3063	-3.79104	5.43799e-07	2.23293e-05
RPP14	127.283	-1.30885	5.5169e-07	2.26111e-05
GNG13	10.9753	-2.87638	5.55493e-07	2.27245e-05
GNAT1	7.7797	-3.95376	5.6027e-07	2.28774e-05
MRPL46	34.7783	-2.33799	5.62381e-07	2.29209e-05
HSP90AA5P	6.45107	-3.58405	5.75513e-07	2.34127e-05
MTFP1	4.30136	-4.22238	5.79912e-07	2.35481e-05
CTAGE5	56.3012	-2.45886	5.83083e-07	2.36332e-05
FKBP4P1	5.1352	-3.90436	5.87929e-07	2.37857e-05
ITPRIPL2	44.8138	-2.40111	5.95477e-07	2.40026e-05
MFAP4	325.966	-2.53728	5.946e-07	2.40026e-05
PCOLCE-AS1	6.29447	-5.36415	6.01885e-07	2.42165e-05
SSPN	30.8208	-2.59241	6.056e-07	2.43214e-05
MBNL3	103.433	-1.8878	6.14207e-07	2.46221e-05
DDN	11.2338	-3.96441	6.16782e-07	2.465e-05
AC004447.2	5.73497	-4.2137	6.17148e-07	2.465e-05
RP11-867G23.8	5.31274	-3.18421	6.24256e-07	2.48887e-05
RPS3AP26	13.6477	-2.20481	6.25785e-07	2.49044e-05
TRIM58	10.018	-3.64896	6.29217e-07	2.49957e-05
RBP7	16.4429	-3.52679	6.30616e-07	2.50061e-05
NDUFA9	74.123	-1.39463	6.36841e-07	2.51869e-05
DLGAP1-AS2	5.84759	-5.63596	6.37469e-07	2.51869e-05
PRRX1	867.496	-2.59604	6.56784e-07	2.59035e-05
PLEKHN1	18.2656	-3.21761	6.59622e-07	2.59688e-05
HOPX	35.8041	-2.93442	6.74158e-07	2.64936e-05
AC005540.3	2.30116	-4.48173	6.82474e-07	2.67248e-05
AC004019.13	3.6228	-5.22575	6.81531e-07	2.67248e-05
RP11-254G11.1	1.45771	-4.40276	6.9493e-07	2.71641e-05
RP11-160H12.3	4.00993	-4.15646	7.11277e-07	2.77045e-05
SSR2	768.827	-1.43756	7.1413e-07	2.77173e-05
AMN	24.2596	-3.57395	7.19524e-07	2.78774e-05
P4HA3	19.5037	-3.24559	7.22704e-07	2.79513e-05
AL590822.1	8.44666	-3.35784	7.27551e-07	2.80401e-05
UPB1	29.9179	-3.30426	7.26765e-07	2.80401e-05
FAM19A1	8.15889	-4.55335	7.3748e-07	2.83234e-05
GPS2	20.6775	-2.23445	7.41363e-07	2.84228e-05
RP11-458F8.4	12.4052	-3.09617	7.5646e-07	2.89511e-05
RP11-439E19.8	13.6654	-2.98297	7.60136e-07	2.90412e-05
RBX1	137.354	-2.08269	7.67639e-07	2.92654e-05
CASP12	22.8344	-2.86122	7.75022e-07	2.94053e-05
CALML6	6.62649	-3.65649	7.81368e-07	2.9544e-05
HBP1	753.732	-0.792987	7.81223e-07	2.9544e-05
F2R	615.852	-1.90764	7.82756e-07	2.95457e-05
DLGAP2	26.1172	-4.2739	7.9142e-07	2.98214e-05
RP11-582J16.5	18.8005	-2.06412	7.99382e-07	2.99683e-05
KCNC1	24.6345	-4.09438	8.00773e-07	2.99683e-05
SPTY2D1	273.984	-0.895176	8.00717e-07	2.99683e-05
RP5-1142A6.2	13.9816	-3.74434	7.97796e-07	2.99683e-05
RBMX2P5	2.14814	-4.5183	8.07844e-07	2.99776e-05
RP11-466H18.1	71.375	-2.24683	8.07598e-07	2.99776e-05
NDUFA13	185.495	-1.82716	8.06703e-07	2.99776e-05
OPHN1	1217.74	-1.53276	8.04267e-07	2.99776e-05
SARNP	21.7822	-2.63019	8.1072e-07	3.00336e-05
KRT8P29	3.14577	-4.57484	8.15631e-07	3.01646e-05
RAD51-AS1	4.14856	-4.10807	8.1861e-07	3.02239e-05
JUN	882.705	-2.06615	8.23601e-07	3.03063e-05
GRM2	23.293	-3.32082	8.2341e-07	3.03063e-05
PFDN4	142.433	-1.66873	8.26092e-07	3.03471e-05
ZFHX3	3357.54	-1.5987	8.44632e-07	3.09764e-05
BCDIN3D	13.4472	-2.14995	8.49397e-07	3.10993e-05
PSMA1	54.9398	-1.60297	8.55732e-07	3.12791e-05
RIPPLY1	3.33622	-3.97219	8.62675e-07	3.14805e-05
AC006024.4	4.56168	-4.07139	8.67265e-07	3.15713e-05
CDK15	18.4866	-3.49275	8.73926e-07	3.17329e-05
RP1-71L16.9	4.53056	-3.62135	8.77099e-07	3.17956e-05
RP5-1180C10.2	27.4617	-2.33821	8.83425e-07	3.19195e-05
RP11-53O19.3	4.77367	-5.60153	8.83182e-07	3.19195e-05
CTD-2547L16.1	3.95452	-4.69592	8.8652e-07	3.19337e-05
C17orf49	11.1104	-2.86105	8.86724e-07	3.19337e-05
CD80	12.1677	-3.19477	8.94207e-07	3.21505e-05
CIR1P2	2.9299	-5.27285	9.08728e-07	3.26192e-05
CHRM5	19.5733	-2.40757	9.10791e-07	3.26399e-05
CLDN2	12.2074	-3.20027	9.14523e-07	3.27203e-05
CDC42EP5	2.75784	-4.25997	9.20583e-07	3.28835e-05
RTBDN	5.62993	-4.88604	9.2705e-07	3.30608e-05
BET1L	49.8387	-1.60692	9.41596e-07	3.34708e-05
CHRNA2	13.0976	-3.91718	9.46057e-07	3.35751e-05
RPL17	121.007	-2.87387	9.57286e-07	3.39188e-05
RP11-252A24.7	7.16988	-3.69147	9.70683e-07	3.43381e-05
PTER	38.8747	-3.11652	9.77266e-07	3.446e-05
TTC3-AS1	4.94958	-3.0485	9.76911e-07	3.446e-05
MEPE	6.40452	-4.80543	1.01339e-06	3.55733e-05
RPSAP15	5.65799	-2.67308	1.04034e-06	3.64499e-05
GPR152	4.72269	-4.14199	1.0427e-06	3.64746e-05
CPA5	8.79794	-3.75935	1.05829e-06	3.6844e-05
ATXN8OS	3.28469	-7.43482	1.05827e-06	3.6844e-05
FAM230A	15.5606	-8.38151	1.08193e-06	3.75479e-05
RP11-345P4.7	4.52267	-3.73054	1.08753e-06	3.76629e-05
CTD-2007L18.5	3.15297	-3.72424	1.08867e-06	3.76629e-05
RPL10A	2093.32	-1.56721	1.10338e-06	3.80083e-05
RP11-180M15.5	1.85756	-3.01163	1.10335e-06	3.80083e-05
RP11-498D10.5	1.85493	-4.32318	1.10385e-06	3.80083e-05
RUNX2	450.335	-2.76004	1.1111e-06	3.81983e-05
RP11-325F22.2	2.63748	-6.39252	1.11833e-06	3.83865e-05
OTOA	29.435	-3.27638	1.12238e-06	3.84657e-05
RP11-516A11.1	31.7903	-2.02329	1.15513e-06	3.95263e-05
ASS1P9	3.52215	-4.22474	1.16558e-06	3.98217e-05
IPCEF1	43.3473	-3.02485	1.17051e-06	3.99283e-05
GPX1P1	3.33381	-4.21566	1.21465e-06	4.13055e-05
NUDT3	88.7993	-1.71614	1.22532e-06	4.13863e-05
PGC	6.28467	-3.74881	1.22586e-06	4.13863e-05
DGKA	401.454	-1.72277	1.22461e-06	4.13863e-05
SYN3	20.9193	-3.58034	1.22201e-06	4.13863e-05
TTC4	25.0723	-2.16803	1.23951e-06	4.17633e-05
TCP1P1	4.35228	-3.86443	1.25181e-06	4.2081e-05
SIGLEC17P	4.80735	-5.14427	1.25278e-06	4.2081e-05
ADAMTSL1	62.9536	-3.76985	1.25705e-06	4.21602e-05
SARS2	50.8849	-1.64571	1.26194e-06	4.22598e-05
MB21D1	27.7649	-2.31	1.27593e-06	4.26631e-05
GALR3	2.49232	-4.54261	1.28896e-06	4.30333e-05
ENY2	358.953	-1.39254	1.31359e-06	4.37228e-05
RPS25	2796.89	-1.81328	1.3333e-06	4.42445e-05
CTD-2525I3.6	7.04946	-3.1609	1.3319e-06	4.42445e-05
RPS13	1146.44	-1.70818	1.34103e-06	4.4434e-05
FAM101A	39.1815	-3.05766	1.34429e-06	4.4475e-05
MREG	16.8313	-2.00329	1.3493e-06	4.45737e-05
BMF	38.6438	-2.60309	1.3645e-06	4.50081e-05
TMEM100	16.5537	-3.97963	1.38444e-06	4.55972e-05
ZNF587	34.6513	-2.66022	1.40286e-06	4.61348e-05
TIFA	30.5425	-2.08848	1.41613e-06	4.65014e-05
EPYC	83.8245	-10.3936	1.42986e-06	4.68824e-05
CYP26A1	6.6039	-4.25481	1.43696e-06	4.69751e-05
RP11-166D19.1	18.6694	-3.96599	1.44401e-06	4.70052e-05
CTD-2020K17.3	5.12678	-4.7915	1.44431e-06	4.70052e-05
CALHM1	5.82114	-5.42532	1.44702e-06	4.70238e-05
RP11-467H10.1	6.10446	-2.13105	1.45302e-06	4.71359e-05
PAN3-AS1	2.36385	-6.45748	1.45476e-06	4.71359e-05
ANKRD39	65.0174	-1.47712	1.46529e-06	4.74073e-05
RAB30-AS1	6.05933	-4.11475	1.47218e-06	4.75601e-05
KCNS2	22.7684	-3.04025	1.49793e-06	4.82168e-05
RP5-940J5.6	15.8379	-2.11007	1.49836e-06	4.82168e-05
SMAGP	12.5796	-3.62244	1.49909e-06	4.82168e-05
TMEM161B-AS1	13.6765	-3.62527	1.50377e-06	4.82967e-05
KCNJ6	48.6623	-4.241	1.51747e-06	4.85944e-05
HS3ST2	55.5966	-3.90643	1.52399e-06	4.86614e-05
CTC-444N24.11	14.307	-3.27873	1.52306e-06	4.86614e-05
AC012309.5	4.11804	-5.58671	1.55041e-06	4.9433e-05
GLT8D2	82.8271	-2.98126	1.63857e-06	5.20173e-05
AC009967.3	1.75487	-4.6197	1.64329e-06	5.20921e-05
ARF3	56.4162	-1.78126	1.66656e-06	5.27536e-05
RP11-613F7.1	1.28484	-3.86561	1.6782e-06	5.30456e-05
NDST3	80.0177	-3.46875	1.69898e-06	5.33291e-05
GTF2H4	10.0681	-2.8462	1.6931e-06	5.33291e-05
ARHGEF5	109.592	-3.82397	1.70173e-06	5.33291e-05
RP11-54D18.3	4.69429	-6.83316	1.70169e-06	5.33291e-05
HIST4H4	43.1721	-2.10821	1.69596e-06	5.33291e-05
SLC13A3	44.8895	-2.26227	1.69393e-06	5.33291e-05
PSMA6	75.4555	-2.19971	1.70702e-06	5.34184e-05
RP11-500C11.3	3.37463	-3.70844	1.72715e-06	5.39716e-05
RP11-372E1.1	3.5329	-3.11698	1.73164e-06	5.40352e-05
RP11-680G24.5	10.4815	-2.88764	1.73729e-06	5.41346e-05
SCTR	12.966	-3.87643	1.762e-06	5.48266e-05
TSPAN13	150.404	-2.19602	1.76457e-06	5.48289e-05
RP11-517H2.6	17.4425	-3.45593	1.77761e-06	5.51562e-05
PFDN6	58.3568	-1.10622	1.78204e-06	5.52156e-05
CCDC129	26.9961	-3.49229	1.7954e-06	5.55511e-05
RP11-142L4.3	3.77091	-2.84898	1.80297e-06	5.56604e-05
RNF183	6.61243	-5.86392	1.804e-06	5.56604e-05
VAMP2	40.2416	-1.54809	1.81469e-06	5.59119e-05
SUSD4	118.651	-2.66194	1.82906e-06	5.62755e-05
PRSS8	49.4839	-2.48115	1.87939e-06	5.76626e-05
NACAP1	6.21825	-2.97504	1.88373e-06	5.77152e-05
AHCTF1P1	46.1375	-2.06682	1.90592e-06	5.82714e-05
PMAIP1	22.3865	-2.55949	1.90984e-06	5.82714e-05
KANK2	217.295	-1.49449	1.90886e-06	5.82714e-05
SH2D7	9.10354	-3.49622	1.91373e-06	5.83089e-05
RPL5P5	6.12349	-2.54151	1.92064e-06	5.84162e-05
IGBP1P4	2.25512	-4.11274	1.97224e-06	5.97603e-05
C5orf60	9.90711	-3.7214	1.97668e-06	5.98122e-05
MIR4426	10.2662	-1.96446	2.00188e-06	6.04215e-05
CRIPT	137.835	-1.46396	2.00475e-06	6.04215e-05
RP1-199J3.7	3.4218	-3.3642	2.00506e-06	6.04215e-05
NLRP6	7.31075	-4.49586	2.02035e-06	6.07988e-05
AP001597.1	11.4719	-3.65865	2.03821e-06	6.11803e-05
2008-03-01	313.466	-0.810961	2.05844e-06	6.16916e-05
ANO7P1	5.95566	-3.70215	2.07213e-06	6.18063e-05
RPL11	6711.74	-1.59936	2.07896e-06	6.18063e-05
PTPRVP	19.1173	-3.85885	2.06643e-06	6.18063e-05
RPL36	3479.21	-1.71344	2.07751e-06	6.18063e-05
CTD-2619J13.14	14.1075	-2.78585	2.07915e-06	6.18063e-05
C4orf32	27.3189	-3.65544	2.10035e-06	6.2352e-05
PTGS2	169.301	-3.0089	2.11269e-06	6.25e-05
RP11-326C3.11	4.70828	-4.18469	2.11263e-06	6.25e-05
SMARCE1	176.386	-1.42521	2.11387e-06	6.25e-05
RPL24	1787.55	-1.67471	2.13522e-06	6.27933e-05
KCTD16	58.1813	-2.97508	2.13283e-06	6.27933e-05
CENPP	107.266	-1.58921	2.13116e-06	6.27933e-05
RP11-111M22.2	67.499	-2.26715	2.13358e-06	6.27933e-05
LDHAL6EP	2.45772	-4.94254	2.14051e-06	6.28645e-05
CTD-2535L24.2	8.1859	-2.63901	2.17125e-06	6.36824e-05
PNRC2	13.024	-2.99317	2.18417e-06	6.39467e-05
RBM34	18.8339	-2.32557	2.18609e-06	6.39467e-05
AARSD1	24.3081	-2.36011	2.18981e-06	6.39703e-05
SUCLG2P2	9.82431	-2.38841	2.19803e-06	6.41252e-05
VSTM4	54.0112	-2.39657	2.21305e-06	6.43925e-05
SHISA7	12.5722	-4.93902	2.21193e-06	6.43925e-05
HCAR1	15.153	-3.67098	2.22042e-06	6.45215e-05
H3F3A	122.509	-1.44715	2.24042e-06	6.4922e-05
GPR111	12.6987	-5.13829	2.24307e-06	6.4922e-05
ST13P18	2.98125	-3.88798	2.23933e-06	6.4922e-05
SCN11A	32.9721	-2.85275	2.24773e-06	6.49284e-05
LPIN3	53.1945	-2.75542	2.2492e-06	6.49284e-05
MYOZ1	12.4553	-2.78269	2.26086e-06	6.51791e-05
POTEF	111.687	-4.66886	2.29467e-06	6.60672e-05
CDK11A	40.8464	-2.31872	2.30036e-06	6.61443e-05
RBM47	39.7142	-2.62397	2.33338e-06	6.70062e-05
ANXA2P3	2.15622	-4.9444	2.33674e-06	6.70149e-05
P2RX2	23.6458	-3.11458	2.34762e-06	6.72393e-05
RP11-23N2.4	3.66729	-3.73723	2.37426e-06	6.79137e-05
MFSD4	50.1583	-2.15956	2.38809e-06	6.81706e-05
KIAA1045	18.5573	-3.57334	2.38945e-06	6.81706e-05
SEMA6D	693.922	-1.71177	2.40015e-06	6.83871e-05
RPSAP51	3.01862	-3.50256	2.40699e-06	6.84918e-05
AC024940.1	3.87052	-4.26815	2.41006e-06	6.84918e-05
TSKS	8.17307	-3.43269	2.43543e-06	6.90343e-05
KMO	23.7505	-2.98162	2.44788e-06	6.92976e-05
RP11-349A22.5	49.7823	-2.10341	2.45257e-06	6.9341e-05
TRPM8	18.2271	-4.48719	2.45604e-06	6.93501e-05
TPPP2	5.62093	-4.66148	2.48295e-06	7.00199e-05
ANKRD34A	21.4799	-2.34363	2.49735e-06	7.02599e-05
GALR2	3.62192	-3.97965	2.49786e-06	7.02599e-05
FGF17	11.9132	-3.72994	2.50276e-06	7.03077e-05
RP11-382J12.1	17.5278	-3.41559	2.52409e-06	7.08164e-05
C1orf216	22.0402	-2.30065	2.52734e-06	7.08172e-05
SLC29A1	665.873	-1.77611	2.58873e-06	7.23528e-05
RP11-848P1.9	14.5308	-2.20743	2.60289e-06	7.2656e-05
RP4-576H24.2	3.20023	-5.66671	2.61541e-06	7.2913e-05
PPM1N	8.83293	-3.45931	2.62108e-06	7.29782e-05
LA16c-366D3.1	2.94306	-5.0127	2.65387e-06	7.37978e-05
CASC7	25.9021	-3.69309	2.68213e-06	7.44892e-05
AC073869.1	8.44496	-4.68235	2.69491e-06	7.47498e-05
RP11-548H3.1	2.63292	-3.50139	2.71134e-06	7.51107e-05
RP5-1024N4.4	5.1297	-3.42511	2.73297e-06	7.53298e-05
PSMD5-AS1	20.9118	-3.47995	2.7293e-06	7.53298e-05
AL627171.2	3.11409	-4.43579	2.73131e-06	7.53298e-05
RP11-1148O4.1	3.74362	-3.14179	2.72792e-06	7.53298e-05
AC034220.3	10.4154	-3.07709	2.74862e-06	7.55747e-05
H3F3B	1006.82	-1.26562	2.74873e-06	7.55747e-05
CNKSR3	162.959	-2.55965	2.76374e-06	7.58923e-05
SNX29P2	38.1495	-2.82811	2.77471e-06	7.60984e-05
RP3-467L1.4	2.27933	-4.01167	2.77942e-06	7.61325e-05
RP11-82O19.1	1.81749	-3.49405	2.7923e-06	7.63902e-05
TMEM45A	121.872	-2.99705	2.81435e-06	7.68977e-05
CTSG	7.0933	-3.73305	2.81928e-06	7.69366e-05
NPM2	15.1886	-2.97373	2.84198e-06	7.74598e-05
ASGR2	5.88237	-4.39423	2.85001e-06	7.74865e-05
AC090587.2	25.5478	-2.07136	2.86046e-06	7.76743e-05
UQCRH	539.195	-1.32031	2.88646e-06	7.81815e-05
KLRF1	3.83397	-3.7275	2.8827e-06	7.81815e-05
SHC1P2	3.52294	-4.15445	2.88981e-06	7.81815e-05
LRRN4CL	6.94158	-4.11079	2.90775e-06	7.857e-05
RP11-481G8.2	5.99323	-3.60551	2.91143e-06	7.85729e-05
POLR3DP1	4.2576	-3.12435	2.92298e-06	7.87879e-05
GLP2R	11.5338	-5.75344	2.92862e-06	7.88431e-05
RP11-577H5.1	3.68839	-2.69667	2.95057e-06	7.93368e-05
RP4-800G7.2	23.0012	-2.57403	2.97039e-06	7.96745e-05
FRMD7	5.83485	-6.25555	2.9697e-06	7.96745e-05
GALT	428.564	-1.52561	2.99554e-06	8.01535e-05
RP11-315J22.5	2.67982	-4.49022	3.03429e-06	8.10916e-05
FAM136A	29.6433	-1.76455	3.06271e-06	8.16938e-05
PDE1B	52.125	-2.28465	3.06426e-06	8.16938e-05
SP7	9.5019	-4.15608	3.08068e-06	8.19326e-05
C14orf166B	11.6316	-2.59403	3.07889e-06	8.19326e-05
ARHGEF34P	60.9066	-3.43837	3.09166e-06	8.21253e-05
KIAA1984	28.7772	-2.36981	3.14316e-06	8.33924e-05
AC002429.5	4.39753	-6.84527	3.16781e-06	8.39452e-05
GRK7	10.1227	-3.46147	3.17437e-06	8.40176e-05
MYH4	11.9901	-5.38594	3.18623e-06	8.42299e-05
EMG1	217.558	-0.801733	3.20497e-06	8.46236e-05
GEMIN6	45.2805	-1.37545	3.21023e-06	8.46606e-05
C10orf32	13.4175	-2.6249	3.2339e-06	8.51825e-05
SAPCD1	3.9626	-4.1759	3.24862e-06	8.54678e-05
HMGB3P2	1.52066	-4.33533	3.25438e-06	8.5517e-05
FBXL22	7.28777	-2.75546	3.26821e-06	8.57778e-05
GUSBP5	4.81282	-6.86745	3.30646e-06	8.66334e-05
RP11-640N11.2	16.8782	-3.98511	3.31264e-06	8.66334e-05
RP11-72I8.1	8.17402	-3.5645	3.30998e-06	8.66334e-05
PHLDB2	830.273	-2.80834	3.36984e-06	8.79201e-05
RP11-314A20.1	3.25379	-2.29082	3.36656e-06	8.79201e-05
STK31	36.7956	-2.30779	3.41242e-06	8.89252e-05
TRIM34	8.73062	-3.46587	3.42592e-06	8.91714e-05
ANKRD20A3	19.3464	-3.51673	3.46544e-06	9.00933e-05
CD33	24.4257	-2.78613	3.47859e-06	9.03281e-05
NRGN	3.96138	-4.45188	3.48758e-06	9.04548e-05
CTC-338M12.9	16.5121	-2.14998	3.51789e-06	9.10645e-05
RNF219-AS1	14.6785	-7.41621	3.52255e-06	9.10645e-05
SLC4A1	17.8244	-3.3696	3.52353e-06	9.10645e-05
HCG25	6.48482	-2.77874	3.54302e-06	9.14606e-05
ILF2P1	7.08711	-2.316	3.56067e-06	9.18084e-05
RP11-543B16.2	3.3442	-3.2739	3.61757e-06	9.31663e-05
FRRS1	88.5599	-1.96804	3.69997e-06	9.51767e-05
RPL29	518.67	-1.65389	3.73227e-06	9.5717e-05
C6orf201	24.6343	-1.92792	3.73842e-06	9.5717e-05
PAIP1P1	5.90528	-2.55322	3.72871e-06	9.5717e-05
RP11-849H4.2	86.7808	-1.2163	3.74444e-06	9.5717e-05
IQSEC3	24.841	-3.57107	3.74711e-06	9.5717e-05
KIAA0040	24.6709	-2.48179	3.79668e-06	9.68705e-05
BHLHE40-AS1	10.2889	-3.15584	3.82183e-06	9.7399e-05
RPL23AP79	18.8687	-3.05417	3.85551e-06	9.81434e-05
AC006023.8	3.79158	-4.21168	3.88241e-06	9.8542e-05
DUOXA1	85.2396	-5.72119	3.88462e-06	9.8542e-05
ANAPC1P1	33.3643	-2.34924	3.8948e-06	9.86862e-05
RPL10AP2	1.99047	-3.562	3.91864e-06	9.91405e-05
TMEM198B	39.6492	-1.81658	3.92175e-06	9.91405e-05
IL17RE	28.6351	-2.35886	3.9883e-06	0.000100707
KCNA4	18.0931	-3.54624	4.01167e-06	0.000101131
LDHBP2	3.53459	-3.05514	4.01431e-06	0.000101131
NAP1L1P1	5.71469	-2.46988	4.01972e-06	0.000101151
FZD5	29.8538	-2.59096	4.04641e-06	0.000101301
RPL14	2977.59	-1.58888	4.06255e-06	0.000101301
CTC-534B23.1	1.75742	-3.51608	4.05465e-06	0.000101301
COLEC10	4.79284	-3.68198	4.05527e-06	0.000101301
OR7E115P	2.46504	-4.36803	4.03737e-06	0.000101301
LINC00263	5.57267	-4.74601	4.06244e-06	0.000101301
EID1	13.2597	-2.7322	4.1012e-06	0.000102033
SNRPGP2	9.87378	-2.84855	4.09728e-06	0.000102033
RP11-112H10.4	3.29781	-5.30554	4.11023e-06	0.000102142
AC008746.3	2.92075	-2.62219	4.1595e-06	0.000103133
RPS3	2793.43	-1.46725	4.18117e-06	0.000103437
BST1	25.4221	-2.24713	4.19613e-06	0.00010369
AC094019.4	1.50416	-4.032	4.22178e-06	0.000103822
PXN-AS1	4.2068	-5.94697	4.21773e-06	0.000103822
CLIC1P1	1.75056	-4.14024	4.22209e-06	0.000103822
AKAP5	61.971	-1.90788	4.22511e-06	0.000103822
RPS28	714.088	-1.81672	4.20963e-06	0.000103822
CD7	6.81751	-4.17349	4.24206e-06	0.000104122
RP11-658F2.8	6.28709	-3.84415	4.25845e-06	0.000104408
RP11-573D15.9	19.3822	-2.39813	4.29936e-06	0.000105294
RPL32	10071.5	-1.65912	4.31734e-06	0.000105499
C16orf87	96.4067	-1.49345	4.31328e-06	0.000105499
RP11-337A23.5	1.93991	-2.74849	4.37859e-06	0.000106876
COA1	227.409	-0.956103	4.40045e-06	0.000107291
CTC-210G5.1	7.14254	-3.55502	4.43412e-06	0.000107992
RPL6P27	17.2768	-1.84128	4.45303e-06	0.000108332
AP000925.2	5.95756	-2.95566	4.47586e-06	0.000108767
GPR141	7.59891	-3.58853	4.49419e-06	0.000109092
LEPROT	82.1327	-1.4378	4.51514e-06	0.000109359
NPTX2	19.7548	-3.37372	4.51387e-06	0.000109359
TMEM151B	20.7856	-3.05495	4.54099e-06	0.000109632
RPL7	2601.15	-1.6282	4.54137e-06	0.000109632
SNRPEP2	2.77289	-2.82105	4.58471e-06	0.000110556
ADRA2B	7.05214	-4.83082	4.62869e-06	0.000111495
MCF2L2	71.7813	-3.32932	4.6384e-06	0.000111606
RPS24	12821.2	-1.7015	4.67964e-06	0.000112475
NBL1	8.06861	-4.45603	4.70127e-06	0.000112485
LY9	21.8218	-4.28048	4.70563e-06	0.000112485
OPRK1	11.7494	-5.52308	4.69782e-06	0.000112485
CRABP1	71.6031	-6.64949	4.69414e-06	0.000112485
RP11-276H1.3	10.2068	-2.4819	4.68621e-06	0.000112485
CNTD1	17.8042	-2.24837	4.7294e-06	0.00011293
LIN37	31.8382	-1.77514	4.73705e-06	0.00011299
MLPH	157.04	-4.89041	4.74419e-06	0.000113037
RP11-439E19.10	6.19145	-6.02804	4.77653e-06	0.000113685
C12orf79	13.5722	-3.3176	4.80407e-06	0.000114216
RP11-342K6.1	3.7966	-4.62477	4.84768e-06	0.000115076
RPL5P1	8.14097	-2.04467	4.8507e-06	0.000115076
MIR600HG	40.0925	-1.98837	4.90371e-06	0.000116208
AC011999.1	2.59634	-4.15304	5.01823e-06	0.000118794
PWAR6	10.0019	-4.61445	5.04882e-06	0.000119389
RP11-649A18.12	12.7425	-2.55069	5.06811e-06	0.000119716
AGMO	21.6924	-5.96489	5.11986e-06	0.000120809
TMEM26	22.9999	-3.88564	5.16335e-06	0.000121444
RP3-368A4.6	10.5209	-3.67124	5.16301e-06	0.000121444
BGLAP	6.60439	-2.75995	5.2138e-06	0.000122499
OR2M3	14.3308	-7.58161	5.24515e-06	0.000123059
RPS19	3250.42	-1.64595	5.24884e-06	0.000123059
RPS27A	4994.72	-1.64239	5.27749e-06	0.000123599
C1QTNF1	30.8074	-2.49631	5.35996e-06	0.000125263
JHDM1D	920.303	-1.1877	5.37409e-06	0.00012546
PKHD1	63.0141	-3.30737	5.38214e-06	0.000125515
CAPN12	23.5432	-2.99533	5.38797e-06	0.000125517
RP11-452G18.2	5.33005	-2.3983	5.39663e-06	0.000125586
COL6A6	55.57	-2.3057	5.40696e-06	0.000125643
KNOP1P2	2.70205	-4.94099	5.4105e-06	0.000125643
STAU2-AS1	9.18979	-2.83319	5.42638e-06	0.000125878
HIST1H4J	2.26433	-5.4393	5.43524e-06	0.000125951
BET1	115.023	-1.14166	5.44658e-06	0.000125953
RP11-1166P10.1	9.1732	-2.82162	5.44679e-06	0.000125953
RNF144A	84.5222	-2.06855	5.46271e-06	0.000126188
TYW5	200.87	-1.02361	5.5184e-06	0.00012734
BAIAP2L1	96.0573	-2.19708	5.55537e-06	0.000128059
RP11-689P11.3	1.76691	-4.15062	5.5688e-06	0.000128234
CTC-453G23.5	3.57296	-3.38005	5.57883e-06	0.000128331
RP11-516A11.3	6.7471	-2.38861	5.60908e-06	0.000128892
TMA16	104.181	-1.02853	5.63066e-06	0.000129252
RP11-219B17.1	4.14244	-5.24779	5.64866e-06	0.00012953
RP11-727F15.12	2.50738	-3.575	5.67869e-06	0.000130083
RPS4XP2	3.82274	-2.72154	5.72507e-06	0.000130872
PTMA	8362.39	-1.6392	5.7318e-06	0.00013089
VENTX	8.86264	-3.46801	5.73784e-06	0.000130892
RP11-46O21.2	3.55697	-3.43613	5.75146e-06	0.000131066
C12orf54	4.41101	-4.34265	5.75766e-06	0.000131072
KRBOX1	3.09071	-5.62029	5.77024e-06	0.000131222
GRAP2	20.5673	-3.35189	5.78291e-06	0.000131374
RIPPLY3	6.11873	-4.85268	5.83848e-06	0.0001325
RP11-341A11.2	2.49568	-5.1987	5.87155e-06	0.000132974
ADM5	7.98304	-2.62817	5.87755e-06	0.000132974
AC016734.2	5.26077	-2.17983	5.94027e-06	0.000134104
ASIC4	25.7788	-2.63783	5.94578e-06	0.000134104
EXOSC7	232.75	-1.23866	5.93468e-06	0.000134104
APOBR	26.2116	-2.33185	5.95479e-06	0.000134169
DUOXA2	36.2367	-5.45645	5.9679e-06	0.000134327
SHE	44.9802	-2.40196	5.97974e-06	0.000134385
TNFAIP8	65.6363	-2.18254	5.98656e-06	0.000134385
POU2F3	26.8519	-3.15137	5.98884e-06	0.000134385
RP11-517P14.7	6.80004	-3.5596	6.0142e-06	0.000134816
ZNRF1	92.457	-1.53933	6.02261e-06	0.000134867
RFTN2	532.458	-2.06149	6.07584e-06	0.000135521
CDH12	22.9158	-4.29772	6.07034e-06	0.000135521
RP11-244J10.1	5.77107	-2.51071	6.0765e-06	0.000135521
CXorf24	9.65822	-2.02074	6.09848e-06	0.000135874
STAT4	54.9342	-2.17895	6.10996e-06	0.000135991
AZU1	3.84937	-4.66727	6.12448e-06	0.000136177
C15orf27	29.3375	-2.30994	6.15738e-06	0.00013677
LEP	7.2555	-4.8952	6.16555e-06	0.000136813
C10orf82	5.26946	-5.40046	6.18701e-06	0.000137151
KCNAB2	195.215	-1.28551	6.20903e-06	0.0001375
RPS20	4697.12	-1.58916	6.21927e-06	0.000137588
GS1-257G1.1	5.02656	-2.82328	6.24727e-06	0.000138069
CDC42EP2	14.1245	-2.27111	6.26606e-06	0.000138206
RASGRP4	35.1765	-1.6317	6.2639e-06	0.000138206
SH3RF3-AS1	6.04633	-3.07291	6.36647e-06	0.000140279
CES5AP1	3.73721	-4.2133	6.50831e-06	0.000143261
SMPDL3B	12.4284	-3.37493	6.5459e-06	0.00014373
SLC18A2	46.682	-1.88576	6.5542e-06	0.00014373
MTL5	19.2513	-3.39605	6.53928e-06	0.00014373
RDH16	13.7041	-2.89534	6.55579e-06	0.00014373
WIPF1	288.806	-1.58733	6.63788e-06	0.000145385
RP11-138A9.2	9.59188	-3.48805	6.72129e-06	0.000146919
DHDH	4.55021	-2.98906	6.7486e-06	0.000147369
KIAA1614	85.4726	-2.13161	6.87564e-06	0.00014975
TWISTNB	88.9432	-1.31626	6.87167e-06	0.00014975
GABPB1-AS1	10.1628	-3.40603	6.87808e-06	0.00014975
HIST1H4H	302.001	-2.42045	6.9198e-06	0.000150282
SOSTDC1	22.881	-3.10817	6.92303e-06	0.000150282
CDC26	35.4735	-1.30367	6.96764e-06	0.000151101
VEPH1	58.7596	-2.89705	7.0066e-06	0.000151497
PIWIL2	82.2358	-1.93595	7.00351e-06	0.000151497
RP11-56B16.2	3.6408	-3.25471	6.99808e-06	0.000151497
ZC3H11B	27.6093	-2.35047	7.02779e-06	0.000151742
LINC01088	8.91831	-4.74153	7.19354e-06	0.000154777
PIK3R2	30.9948	-2.21982	7.18863e-06	0.000154777
TM4SF20	11.2483	-2.80368	7.20446e-06	0.000154861
RP11-174F8.1	4.91673	-2.6328	7.24266e-06	0.00015553
DGCR5	33.8622	-2.87149	7.26062e-06	0.00015576
PLA2G7	238.448	-2.35424	7.2941e-06	0.000156176
HSPA9P1	17.0951	-2.1644	7.35863e-06	0.000157404
RP11-260M2.1	10.3479	-1.67579	7.42922e-06	0.00015876
LINC00937	23.8222	-2.95264	7.45054e-06	0.000159061
RP11-572P18.1	19.903	-2.45351	7.48756e-06	0.000159696
RP11-342M1.6	2.95209	-4.66328	7.51937e-06	0.000160103
GGCT	126.524	-1.04869	7.52121e-06	0.000160103
YJEFN3	13.7193	-2.92357	7.54648e-06	0.000160485
PLA2R1	616.643	-2.58052	7.58222e-06	0.000161089
PTGER3	20.1235	-5.13106	7.62564e-06	0.000161855
KCTD10	250.146	-0.98452	7.72744e-06	0.000163858
RP11-114F3.2	2.13539	-3.26152	7.84684e-06	0.000165946
HPN-AS1	2.89237	-4.3513	7.85475e-06	0.000165946
LGALS4	15.9414	-2.25235	7.85616e-06	0.000165946
EGFLAM	55.7887	-2.19837	7.98959e-06	0.000168603
CACNA1F	33.1877	-3.07211	8.00384e-06	0.000168741
SPTA1	27.5806	-4.40726	8.06946e-06	0.000169962
RP11-346C16.2	2.80096	-3.46819	8.08345e-06	0.000170093
ANKRD62	10.3586	-5.65472	8.15207e-06	0.000171373
HNRNPA1P48	97.7861	-1.35915	8.16883e-06	0.000171561
RP11-516C1.1	1.59568	-3.87707	8.22224e-06	0.000172518
RP11-148K1.12	5.77089	-2.65867	8.24503e-06	0.000172831
NTNG2	54.3636	-3.24735	8.29804e-06	0.000173776
CFB	232.143	-1.68847	8.3661e-06	0.000174868
CPA6	16.3686	-3.80676	8.36389e-06	0.000174868
RP11-87C12.2	3.90394	-4.7282	8.37454e-06	0.000174878
NPM1P32	2.32335	-3.16503	8.48193e-06	0.000176953
HPSE	28.8617	-2.47036	8.50143e-06	0.000177023
GGACT	8.07517	-2.90966	8.49459e-06	0.000177023
RP11-386M24.4	10.912	-1.62203	8.53081e-06	0.000177467
PAXBP1-AS1	28.168	-2.0493	8.65513e-06	0.000179883
RP11-345P4.9	5.82154	-3.74382	8.68703e-06	0.000180205
MIR24-2	23.7958	-2.94129	8.68346e-06	0.000180205
IL24	6.12824	-4.41563	8.69588e-06	0.000180218
GINS4	33.138	-2.18227	8.70865e-06	0.000180313
C21orf67	14.8697	-2.24343	8.76835e-06	0.000181378
MOGAT1	2.49102	-4.20717	8.7835e-06	0.000181396
RP11-439E19.3	20.7352	-2.58714	8.81237e-06	0.000181775
AC009005.2	2.67488	-3.95634	8.82377e-06	0.000181839
NR2F2-AS1	7.55117	-5.98728	8.84998e-06	0.000182208
PDGFD	108.099	-2.3779	8.95955e-06	0.000184292
TMEM56	34.6128	-2.89345	8.9787e-06	0.000184513
STPG2	46.3904	-1.839	9.00886e-06	0.00018496
ITIH3	27.8199	-2.54495	9.03143e-06	0.00018525
RP11-51O6.1	30.1091	-1.60758	9.04295e-06	0.000185313
SLC25A53	34.4615	-2.46513	9.11819e-06	0.000186681
MYH16	27.9553	-2.63825	9.15396e-06	0.000187238
RP11-334L9.1	8.76356	-2.762	9.23529e-06	0.000188726
OR2W3	3.87667	-4.94635	9.29961e-06	0.000189864
SARDH	37.6521	-2.4716	9.32976e-06	0.000190303
GPR149	7.80006	-7.11971	9.37141e-06	0.000190975
RP11-210N13.1	4.87305	-2.96384	9.38235e-06	0.000191021
SEPT7P8	2.06855	-3.90593	9.47773e-06	0.000192647
SCARF2	130.455	-1.98804	9.47976e-06	0.000192647
RP11-465N4.5	3.71468	-2.70244	9.50499e-06	0.000192981
EIF4BP6	49.448	-1.6681	9.55347e-06	0.000193786
RP11-13J8.1	2.35782	-5.43642	9.58693e-06	0.000194286
KRT18P26	3.77177	-3.70477	9.61678e-06	0.000194711
CLEC4D	4.07678	-5.41653	9.69816e-06	0.000196178
RNF24	87.3816	-1.50309	9.73215e-06	0.000196684
CCDC144A	35.7628	-5.93326	9.80125e-06	0.000197899
CLEC4A	36.0393	-1.779	9.89568e-06	0.000199622
ITFG2	275.693	-0.976452	1.00057e-05	0.000201472
RP11-357G3.2	1.5824	-3.73152	1.00347e-05	0.00020187
DEPDC7	22.3424	-2.41328	1.00673e-05	0.000202341
SEPHS1P6	3.84809	-3.46071	1.01639e-05	0.000204096
RP11-401P9.6	45.9502	-2.84013	1.03203e-05	0.000207048
LYPLA1P3	5.90026	-2.83068	1.03314e-05	0.00020708
C8orf76	45.6505	-1.61872	1.03657e-05	0.000207579
CCL17	2.12419	-3.42664	1.04068e-05	0.000208213
TMEM242	72.9964	-1.21706	1.05453e-05	0.000210792
LSM6	127.233	-1.18986	1.05877e-05	0.000211434
IL27	2.64269	-4.99555	1.06621e-05	0.000212545
LILRB5	30.771	-2.65244	1.06907e-05	0.000212922
TBPL2	6.41182	-4.00974	1.07223e-05	0.000213358
KCNS3	27.4377	-2.65919	1.07348e-05	0.000213413
RAB42	11.6112	-2.42527	1.08058e-05	0.000214105
AC010468.1	2.79232	-3.29781	1.07976e-05	0.000214105
ATP5E	1360.65	-1.47752	1.08242e-05	0.000214221
HSD17B13	9.89483	-3.40418	1.0906e-05	0.000215647
RP11-498D10.6	2.92968	-4.0992	1.10057e-05	0.000217421
GSDMA	5.0178	-4.78438	1.10598e-05	0.000218294
TAS2R18	1.86805	-4.77729	1.12018e-05	0.000220899
RP11-510H23.1	36.3208	-1.99558	1.12386e-05	0.000221228
KRT18P34	6.86636	-2.62931	1.12547e-05	0.000221346
EPN2-AS1	2.77466	-4.35825	1.13341e-05	0.000222707
PRLR	70.422	-3.43955	1.13629e-05	0.000223004
DTNB	390.543	-1.03591	1.14265e-05	0.000223791
C4orf6	3.76995	-3.45918	1.14557e-05	0.000223791
RP11-624G19.1	4.39314	-3.99964	1.14498e-05	0.000223791
HNRNPA1	16588.3	-1.44419	1.14471e-05	0.000223791
PKIB	14.0366	-3.10875	1.14866e-05	0.000224101
DNASE1L1	29.6524	-1.85908	1.15236e-05	0.000224622
CTD-2194F4.2	1.79133	-4.52079	1.16519e-05	0.000226923
CTD-2272G21.2	6.81043	-2.7294	1.16938e-05	0.000227538
SULT2B1	7.21736	-4.03435	1.173e-05	0.000228039
RP11-646I6.6	2.34485	-3.50335	1.17422e-05	0.000228075
ZNF725P	7.15033	-2.76041	1.1754e-05	0.000228102
KB-431C1.5	4.67066	-3.47947	1.17751e-05	0.00022831
ELOVL6	81.5497	-1.67483	1.18014e-05	0.000228619
KBTBD11	22.7571	-3.13545	1.18271e-05	0.000228914
RPS4XP11	5.34459	-2.25376	1.1897e-05	0.000230065
KCNN4	9.59958	-3.60908	1.19111e-05	0.000230134
OSR2	21.5885	-3.99312	1.19431e-05	0.000230549
PKDREJ	57.9468	-2.12663	1.1963e-05	0.000230732
FBXO17	16.8167	-3.63277	1.19853e-05	0.000230756
ADM2	10.6156	-4.45663	1.19839e-05	0.000230756
CD28	17.1378	-3.45881	1.19993e-05	0.000230824
AC104438.1	1.31648	-4.21553	1.20466e-05	0.000230986
FKBP6	6.30564	-4.17909	1.20498e-05	0.000230986
SH3PXD2A	759.662	-1.08342	1.20403e-05	0.000230986
CCDC68	17.6675	-3.31218	1.2034e-05	0.000230986
RNF216P1	67.8769	-1.28538	1.2066e-05	0.000231095
AC007790.4	2.2453	-3.81822	1.2165e-05	0.000232787
EPB41	456.444	-1.47674	1.21807e-05	0.000232887
AC105760.3	6.30015	-3.93607	1.21975e-05	0.000233004
MESP1	22.1462	-2.29522	1.22425e-05	0.000233661
RP11-572F4.1	3.25979	-2.33826	1.23313e-05	0.000234948
RUSC1-AS1	27.5647	-1.87597	1.2366e-05	0.000235405
EXOC5P1	9.54574	-2.45438	1.23837e-05	0.000235413
HNRNPA1P67	3.21219	-3.29797	1.23879e-05	0.000235413
TMEM208	56.073	-1.35085	1.24806e-05	0.000236969
MIOX	6.23213	-3.50972	1.26911e-05	0.000240343
MMP23A	3.55757	-4.03369	1.27777e-05	0.00024158
AC013717.3	1.93054	-3.26671	1.27784e-05	0.00024158
NARG2P2	4.62693	-6.97099	1.28001e-05	0.000241782
PMF1	27.7399	-1.66385	1.28363e-05	0.000242258
DNAJC12	35.6244	-1.88763	1.28567e-05	0.000242435
ALDH1L2	174.272	-1.68017	1.28953e-05	0.000242954
ACE2	12.8792	-3.28918	1.29255e-05	0.000243314
DOK2	15.9043	-2.46896	1.2976e-05	0.000244056
CRYBB2P1	78.3875	-1.55969	1.33471e-05	0.000250393
AC064836.3	3.38952	-2.68612	1.33602e-05	0.000250425
TBC1D10C	39.9236	-1.96054	1.34144e-05	0.000251225
NOL7	15.8216	-1.88553	1.35423e-05	0.000253405
PRICKLE1	97.5525	-2.61265	1.3648e-05	0.000255165
CRIP1	9.60677	-3.03616	1.36758e-05	0.000255468
GPR20	3.00314	-5.19763	1.37114e-05	0.000255914
ZSCAN2	115.967	-1.21058	1.37304e-05	0.000256052
RP11-417F21.1	2.94476	-5.29463	1.37675e-05	0.000256526
CD200R1	18.7213	-2.6942	1.38321e-05	0.000257512
RP4-635A23.4	3.94684	-3.07225	1.39199e-05	0.000258707
KIAA1984-AS1	18.438	-2.53721	1.39179e-05	0.000258707
RP1-228H13.1	1.92903	-3.15315	1.40126e-05	0.000259771
RFPL2	6.55583	-4.38687	1.40093e-05	0.000259771
LL0XNC01-116E7.1	2.90796	-4.00083	1.40044e-05	0.000259771
PSMD10P3	1.62716	-3.42292	1.40673e-05	0.000260565
TYRP1	9.7255	-4.0878	1.41029e-05	0.000261005
RP11-431M7.3	4.90754	-4.68909	1.41212e-05	0.000261124
RP4-669P10.16	1.62639	-4.27769	1.41808e-05	0.000262006
FCAMR	7.33933	-5.42678	1.42203e-05	0.000262294
YBX1P1	9.82044	-1.65416	1.42106e-05	0.000262294
CBWD5	370.689	-1.32461	1.42969e-05	0.000263264
RP11-5N19.3	2.91271	-3.6192	1.42961e-05	0.000263264
SSBP1	253.774	-1.00409	1.43287e-05	0.000263628
FGFBP2	2.41142	-6.09281	1.43471e-05	0.000263746
TNFRSF9	6.95	-3.68913	1.44876e-05	0.000265955
CACNB4	231.031	-1.46979	1.44914e-05	0.000265955
USP41	3.92584	-4.36124	1.4509e-05	0.000266054
SMCO2	5.73168	-3.78876	1.45219e-05	0.000266069
LAMB1	2473.15	-1.83815	1.45572e-05	0.000266272
KARSP1	7.96158	-2.7336	1.45559e-05	0.000266272
TMEM256	39.9882	-1.31798	1.45884e-05	0.00026662
RP5-854E16.2	7.53021	-2.65516	1.46079e-05	0.000266755
DLK2	29.7849	-1.75878	1.47267e-05	0.000268478
SETP2	2.63768	-4.39219	1.47264e-05	0.000268478
AC010127.3	6.62247	-6.4513	1.48355e-05	0.000269927
AC004041.2	5.25752	-2.79892	1.48395e-05	0.000269927
RP11-345J4.5	9.42805	-4.72246	1.4843e-05	0.000269927
CHST11	159.522	-1.59249	1.4911e-05	0.000270939
FCRL1	7.67296	-5.29977	1.49836e-05	0.000271809
PROCA1	52.2229	-1.54722	1.49799e-05	0.000271809
RP11-88L24.4	4.48665	-4.68387	1.50357e-05	0.000272079
EPGN	6.71094	-3.0954	1.50356e-05	0.000272079
OSCAR	13.5788	-2.46816	1.50253e-05	0.000272079
COL5A2	4718.99	-2.03504	1.51267e-05	0.0002735
FSCN3	12.102	-2.98566	1.51495e-05	0.000273687
RP1-130H16.16	5.58968	-2.90689	1.52488e-05	0.000275255
SLC22A7	15.1487	-2.64062	1.52977e-05	0.000275911
RP11-435B5.4	19.3239	-3.35478	1.53534e-05	0.000276688
RP11-608O8.2	2.95218	-4.08014	1.54585e-05	0.000278126
C15orf48	22.962	-3.43043	1.54926e-05	0.000278511
POLR3K	22.3788	-1.64547	1.55158e-05	0.000278702
TMEM184A	30.9145	-2.9914	1.55404e-05	0.000278915
SLC5A2	25.7389	-2.37506	1.55927e-05	0.000279625
SHC4	33.8013	-2.27086	1.56182e-05	0.000279854
ADTRP	14.3913	-3.49621	1.56566e-05	0.000280314
DAPK2	35.798	-2.59556	1.57009e-05	0.000280649
SH2D3A	33.2231	-2.43678	1.56886e-05	0.000280649
C1D	87.9816	-0.995241	1.57299e-05	0.000280912
SNURF	12.7605	-2.45104	1.57667e-05	0.000280912
AC019294.1	4.22516	-3.34173	1.5763e-05	0.000280912
OXT	1.45452	-4.34953	1.57566e-05	0.000280912
AVPR1A	18.1843	-2.47429	1.58017e-05	0.000281306
EEPD1	196.359	-1.76831	1.58189e-05	0.000281384
KB-1572G7.3	4.03674	-3.38867	1.58569e-05	0.000281833
PILRB	38.0902	-2.32524	1.59699e-05	0.000283612
RP11-982M15.6	3.02903	-4.94733	1.59987e-05	0.000283893
FITM1	6.24216	-2.6286	1.60291e-05	0.000284203
CHRM3	35.7122	-3.74907	1.61226e-05	0.000284895
RP11-656G20.1	11.2366	-3.23656	1.6133e-05	0.000284895
C11orf1	60.3022	-1.39857	1.61162e-05	0.000284895
LINC00893	33.438	-1.94864	1.61286e-05	0.000284895
RP13-228J13.6	3.39452	-3.37308	1.61038e-05	0.000284895
TMEM141	12.6889	-2.24722	1.62386e-05	0.000286529
PIN4	254.6	-1.43701	1.63255e-05	0.000287833
CNGA1	19.3044	-2.92766	1.63979e-05	0.000288645
IL23A	6.10867	-2.33125	1.63861e-05	0.000288645
ZNF785	72.3414	-1.12534	1.64713e-05	0.000289705
EFCAB5	27.5837	-3.13151	1.65123e-05	0.000289962
CTD-2540F13.2	3.39722	-4.78156	1.65036e-05	0.000289962
RAB17	9.3303	-5.56531	1.65274e-05	0.000289996
CCDC64B	11.8267	-4.43515	1.66419e-05	0.000291772
RAB24	20.87	-2.10503	1.67014e-05	0.000292581
CTA-215D11.4	1.70342	-4.64803	1.68971e-05	0.000295773
MARCO	13.1446	-3.94218	1.69324e-05	0.000296155
SIX4	53.2336	-2.09987	1.70241e-05	0.000297286
AAMDC	71.9396	-1.06571	1.70453e-05	0.00029742
FAM167B	2.91421	-3.65718	1.70738e-05	0.00029768
CCDC107	7.49149	-2.42391	1.70957e-05	0.000297826
C12orf42	14.5266	-3.57486	1.71491e-05	0.000298326
ASPG	12.6947	-3.14851	1.71516e-05	0.000298326
RP4-607J23.2	6.65751	-2.79825	1.73087e-05	0.00030082
CTSE	4.8339	-6.27539	1.74115e-05	0.000302368
RIMKLBP2	2.34803	-3.51419	1.75123e-05	0.000303474
XIRP2	47.6691	-3.68314	1.75442e-05	0.000303474
RP11-112J1.3	1.84499	-3.11043	1.75399e-05	0.000303474
LINC00933	4.83595	-7.74402	1.75222e-05	0.000303474
RPL9P29	1.50371	-4.14347	1.75184e-05	0.000303474
AC022532.1	4.2192	-4.41392	1.76166e-05	0.000304486
RP5-1071N3.1	7.95498	-3.49337	1.76358e-05	0.000304579
GLUD1P2	11.3804	-2.8554	1.76623e-05	0.000304715
TMEM143	28.4041	-1.83765	1.77795e-05	0.000306338
RP11-787P24.1	4.30207	-5.59532	1.78349e-05	0.000306811
S100Z	5.32533	-5.0145	1.78557e-05	0.000306927
NPM1P24	6.20858	-2.15164	1.78885e-05	0.000307226
LRG1	8.86589	-4.06695	1.7901e-05	0.000307226
PRR4	38.1078	-1.81773	1.80431e-05	0.000309424
RP11-566E18.3	6.45787	-4.97597	1.84821e-05	0.000316704
ADAMTS4	69.6864	-2.17825	1.85567e-05	0.000317735
RPL5P20	2.1827	-4.42008	1.87132e-05	0.000320134
PPM1H	121.618	-1.78712	1.8726e-05	0.000320134
CATSPER1	9.66369	-3.37129	1.87883e-05	0.000320949
AC018442.1	8.74846	-2.8285	1.88219e-05	0.000321273
CTD-2017D11.1	8.95255	-2.85922	1.90072e-05	0.000324186
NOX1	12.4451	-2.37611	1.90487e-05	0.00032464
COL5A1	8902.95	-2.22264	1.92986e-05	0.000328136
HNRNPA3P11	28.5598	-1.88404	1.92878e-05	0.000328136
CHODL	22.3275	-3.68233	1.92767e-05	0.000328136
N4BP2L1	121.164	-1.36969	1.94134e-05	0.000329832
RBMXP2	10.7436	-1.90279	1.94628e-05	0.000330417
C1QTNF7	60.6348	-2.13455	1.95024e-05	0.000330618
RP11-556O9.3	2.527	-3.41953	1.95048e-05	0.000330618
TMPRSS15	8.23667	-5.70716	1.95355e-05	0.000330884
YWHAZP5	4.34885	-2.81269	1.95782e-05	0.000331351
FFAR4	11.2035	-3.7857	1.96061e-05	0.000331569
TDRD6	72.6728	-2.28495	1.97099e-05	0.000332857
NOL12	109.809	-1.60833	1.97126e-05	0.000332857
GPR115	7.96121	-4.42347	1.9791e-05	0.000333924
COL24A1	110.248	-2.47632	1.98739e-05	0.000335065
RP11-53M11.3	2.167	-5.67984	2.00139e-05	0.000337167
WNK4	115.878	-1.7894	2.01091e-05	0.000338511
SUN3	3.3391	-5.30796	2.01948e-05	0.000339692
ASB9	19.915	-2.29729	2.0256e-05	0.000340462
ILF2P2	2.93693	-4.21807	2.03278e-05	0.000341408
FSCB	4.83278	-7.50075	2.0361e-05	0.000341704
BARHL1	9.96046	-2.61172	2.04324e-05	0.000342641
NACA	6992.41	-1.16467	2.04907e-05	0.000343357
VKORC1	24.8449	-2.04932	2.0542e-05	0.000343954
2006-09-01	175.925	-1.13801	2.05754e-05	0.00034425
RP11-146F11.1	9.54656	-1.72069	2.07069e-05	0.000346186
ARHGAP24	282.269	-2.03251	2.07455e-05	0.000346569
DHRS13	20.4225	-1.95564	2.08324e-05	0.000347756
IFITM1	184.077	-2.48107	2.08887e-05	0.000348431
CTC-260E6.6	18.8418	-2.54841	2.09493e-05	0.000349177
NDUFS5	633.217	-1.38535	2.10367e-05	0.000350056
ADRB1	9.3281	-3.71269	2.10499e-05	0.000350056
RP11-616K22.1	3.39157	-3.18513	2.10487e-05	0.000350056
RAB27B	19.3856	-4.42632	2.10732e-05	0.000350179
PAPLN	71.2848	-2.50988	2.11209e-05	0.000350706
CCT7P1	7.10344	-2.65042	2.11909e-05	0.000351592
LINC00637	4.7278	-4.44067	2.12063e-05	0.000351592
RP11-734E19.1	2.75834	-3.03084	2.12887e-05	0.000352626
LINC00894	42.1297	-2.01816	2.13008e-05	0.000352626
RP11-115L11.1	1.60255	-4.45595	2.13201e-05	0.000352681
CNIH4	289.232	-1.11292	2.14062e-05	0.000353306
DUSP2	8.53045	-3.10579	2.13804e-05	0.000353306
RP11-430B1.2	3.49924	-6.8663	2.13991e-05	0.000353306
AC017101.10	1.44466	-4.23934	2.1584e-05	0.000355974
CD244	8.43603	-3.64552	2.16261e-05	0.000356401
CSDC2	14.48	-2.82697	2.17232e-05	0.000357732
AC009014.3	3.56642	-4.64824	2.17489e-05	0.000357887
RP11-206L10.9	53.422	-1.70134	2.18919e-05	0.000359702
RP11-613F22.5	2.832	-2.85557	2.19193e-05	0.000359883
RP11-390P2.4	4.95525	-3.10966	2.19999e-05	0.000360937
KIF12	8.96447	-5.14323	2.20314e-05	0.000361184
HHEX	42.4075	-1.83807	2.20753e-05	0.000361633
RP11-297L17.6	5.43308	-2.08151	2.21726e-05	0.000362957
ACOT13	66.0792	-1.40162	2.22782e-05	0.000363999
NPC1L1	19.6495	-2.98566	2.22538e-05	0.000363999
NARF-IT1	4.43746	-2.25104	2.2286e-05	0.000363999
KRT18P38	5.06877	-3.03675	2.25878e-05	0.000368654
TMEM155	7.74779	-4.60719	2.2719e-05	0.000369532
RP11-468O2.1	11.6102	-2.30317	2.27257e-05	0.000369532
RPS2P5	47.0668	-1.67046	2.26816e-05	0.000369532
RP11-815J4.6	16.8336	-2.73533	2.26961e-05	0.000369532
GRPR	15.0736	-2.72992	2.2693e-05	0.000369532
MDS2	5.00915	-5.05932	2.2786e-05	0.000370239
NPY1R	12.6497	-3.87354	2.28677e-05	0.000371017
SYNE4	15.9803	-2.25488	2.28537e-05	0.000371017
CDY4P	3.0812	-5.84324	2.29129e-05	0.000371476
RP11-190C22.1	1.38821	-4.40402	2.29304e-05	0.000371487
SCN2B	27.6649	-3.49021	2.3031e-05	0.000372746
CXorf21	10.3108	-2.60692	2.30421e-05	0.000372746
OSTC	357.852	-1.42676	2.30985e-05	0.000373336
NHSL2	206.464	-1.41033	2.31126e-05	0.000373336
GLB1L3	23.1507	-4.00876	2.3136e-05	0.00037344
ADCY7	163.142	-1.29797	2.31715e-05	0.000373738
RPL21P17	1.86054	-3.02938	2.31966e-05	0.000373868
RP11-320A16.1	2.87242	-3.20518	2.32665e-05	0.00037472
C18orf32	4.04725	-4.09861	2.3316e-05	0.000375242
LINC00342	8.24735	-3.52189	2.34164e-05	0.000376583
HIST1H4K	3.34806	-4.95134	2.36046e-05	0.000379054
AC010761.8	14.3828	-1.77971	2.39002e-05	0.00038352
APOF	5.9874	-3.0893	2.39248e-05	0.000383636
EIF3LP2	2.54213	-3.43606	2.41407e-05	0.000386815
TYR	10.6102	-3.17127	2.41651e-05	0.000386923
RP11-365O10.1	1.63202	-4.26226	2.43128e-05	0.000389005
EDARADD	20.5043	-4.47864	2.43329e-05	0.000389044
TMEM86A	27.0519	-2.16577	2.44394e-05	0.000390461
OR2T12	6.41156	-7.6441	2.46011e-05	0.00039276
RP11-316E14.2	1.97103	-3.56211	2.46419e-05	0.000393125
SFTPC	9.39502	-3.62038	2.46931e-05	0.000393656
ATP6V0D2	7.59899	-4.0945	2.48147e-05	0.000395308
TAS2R63P	4.19076	-3.11115	2.48475e-05	0.000395544
GNA14	16.4972	-2.31502	2.48867e-05	0.000395593
RP11-219G17.4	9.72996	-3.14681	2.48778e-05	0.000395593
CLEC9A	9.63137	-3.26895	2.49147e-05	0.000395753
RP5-1159O4.1	3.94118	-4.43405	2.51051e-05	0.000398488
BHLHB9	78.3977	-1.28714	2.51395e-05	0.000398747
MPZL2	83.5485	-3.18389	2.55012e-05	0.000403901
AC007750.5	6.97704	-6.19626	2.56507e-05	0.000405975
LMAN1	1551.91	-1.03603	2.56857e-05	0.000406237
AC103965.1	17.2883	-3.39315	2.58012e-05	0.00040777
AC004019.10	2.69336	-4.46352	2.58264e-05	0.000407875
GBP5	93.1122	-2.98703	2.59821e-05	0.000410039
THEG	3.6268	-6.12543	2.60396e-05	0.000410652
RP1-34B20.4	1.28191	-4.29619	2.61128e-05	0.000411511
C22orf34	33.639	-2.67062	2.62491e-05	0.000413363
CDK3	3.03283	-6.70511	2.63528e-05	0.000414697
ZFYVE9P1	4.78119	-3.92678	2.64412e-05	0.000415791
HIST2H2BC	1.79409	-3.67582	2.65246e-05	0.000416805
MRGPRE	3.60306	-4.14828	2.65558e-05	0.000416996
AC011242.5	5.44012	-3.09061	2.65769e-05	0.000417029
RP11-458F8.3	3.44989	-2.06993	2.66047e-05	0.000417168
APOA1	5.10009	-3.3172	2.66249e-05	0.000417186
AP004289.2	7.22403	-2.73775	2.66606e-05	0.000417448
MIR17HG	11.9355	-3.60246	2.7001e-05	0.000421912
PROZ	42.1192	-2.35084	2.70033e-05	0.000421912
RP11-632K20.7	35.352	-1.5387	2.71236e-05	0.000423491
RP11-275I14.4	1.18062	-4.41146	2.72272e-05	0.000424505
HSPA8P15	1.50822	-5.11894	2.73146e-05	0.000425465
RPS18P12	9.35161	-1.70638	2.73275e-05	0.000425465
HOXB3	14.2562	-5.43966	2.74334e-05	0.000426812
CCDC85A	18.1417	-3.04695	2.79993e-05	0.000434999
SRSF2	16.5156	-2.48502	2.82741e-05	0.000438959
KRT18P25	3.09183	-4.23869	2.83759e-05	0.000440228
TM4SF19	2.08453	-4.82288	2.84157e-05	0.000440534
ANKRD26P3	4.59666	-7.84727	2.84693e-05	0.000441053
MBD3	37.9303	-1.79856	2.8575e-05	0.000442379
FMOD	587.841	-3.25047	2.86187e-05	0.000442743
RP11-344H11.4	1.37113	-3.86473	2.88179e-05	0.000445003
MSC	9.26503	-3.11168	2.88255e-05	0.000445003
ZMYM6NB	2.22931	-5.09983	2.89419e-05	0.000446486
RPL12P33	1.62587	-3.44801	2.9309e-05	0.000451198
LTB4R	29.689	-1.96274	2.92907e-05	0.000451198
CACTIN-AS1	9.57057	-2.42332	2.95413e-05	0.000454457
TES	105.798	-1.92552	2.95804e-05	0.000454738
TMSB15B	64.2882	-2.09195	2.9781e-05	0.000457183
HERC2P7	1.64136	-4.28188	2.98628e-05	0.000458119
CD209	48.9191	-3.16435	2.99476e-05	0.000458779
AC006116.22	15.2511	-1.96113	2.99421e-05	0.000458779
TTC39A	107.147	-2.43556	3.00379e-05	0.000459616
TXNDC2	10.818	-3.36025	3.00441e-05	0.000459616
S100A1	13.0324	-2.70205	3.00846e-05	0.000459915
MAGEA8	5.00858	-4.99912	3.01465e-05	0.000460541
AC004797.1	18.2709	-1.4747	3.02737e-05	0.000462163
SNAI2	143.067	-2.52161	3.03847e-05	0.000463535
ABRA	8.7404	-3.32752	3.04909e-05	0.000464833
RP11-466G12.2	1.52914	-4.30856	3.05288e-05	0.000465089
IFIT1B	23.744	-1.70307	3.08177e-05	0.000468839
RPL18P10	2.07077	-3.10386	3.09861e-05	0.000470749
RP11-589F5.3	19.2015	-2.78003	3.10858e-05	0.000471938
NMUR2	7.05584	-4.52946	3.12097e-05	0.00047342
RP11-799B12.2	1.95781	-3.51819	3.12266e-05	0.00047342
IGBP1P1	8.12197	-2.23778	3.12711e-05	0.000473768
PEX5L	109.455	-2.70847	3.13607e-05	0.000474364
FAM205B	16.7122	-3.02943	3.13463e-05	0.000474364
ITGB7	99.2342	-1.44985	3.13968e-05	0.000474364
TTC9B	11.4908	-2.99072	3.13764e-05	0.000474364
RPL7AP71	1.40079	-5.35012	3.16931e-05	0.000477855
RP11-565J7.1	1.56513	-3.00204	3.19003e-05	0.000480649
GSTO2	103.092	-2.30871	3.21348e-05	0.00048385
ZIC3	36.602	-3.31874	3.21657e-05	0.000483984
SPHK1	24.3096	-2.42579	3.22114e-05	0.00048434
NAA38	208.017	-1.00377	3.2284e-05	0.0004851
C2orf68	74.2838	-1.05814	3.25047e-05	0.000488081
RP11-434C1.3	3.54547	-4.12101	3.25621e-05	0.000488609
FOXJ2	290.158	-0.810188	3.27215e-05	0.000490666
SYF2	548.668	-1.01416	3.30287e-05	0.000493925
TDRD10	17.4494	-2.37387	3.2981e-05	0.000493925
HSPA8P16	4.71528	-4.60769	3.30085e-05	0.000493925
SGCA	16.4759	-2.76668	3.29906e-05	0.000493925
MIA	4.22762	-3.4799	3.31593e-05	0.00049554
SERBP1P1	11.0855	-1.80432	3.31903e-05	0.000495666
LPCAT4	122.692	-1.13796	3.33309e-05	0.000497427
AC004158.3	5.42194	-6.79689	3.35388e-05	0.00050019
LRRC31	10.9891	-3.07965	3.36184e-05	0.00050089
PA2G4P2	6.97792	-2.43848	3.37506e-05	0.000502326
GPR89B	78.7999	-1.44866	3.38618e-05	0.000502659
PTGIS	112.154	-3.62167	3.3821e-05	0.000502659
IL12A	10.9391	-2.94139	3.40557e-05	0.000505155
CREB3L2	322.373	-1.27569	3.42919e-05	0.000508316
BIRC5	11.6367	-3.72229	3.43313e-05	0.000508557
SDR16C5	5.30435	-8.62903	3.45872e-05	0.000512003
MMP11	34.0668	-3.02952	3.46225e-05	0.000512181
KLHL34	5.6344	-5.05281	3.46856e-05	0.000512769
TBX4	13.7854	-4.32484	3.47352e-05	0.000512811
OR7E161P	2.13733	-4.4994	3.5153e-05	0.000518631
TMEFF1	10.1224	-3.36879	3.53945e-05	0.000521493
FCN3	5.98353	-3.93064	3.55434e-05	0.000522985
CPA4	26.3183	-3.68601	3.55299e-05	0.000522985
OR7E106P	2.42827	-4.37011	3.55842e-05	0.000523235
WDR83OS	78.9844	-1.72264	3.56342e-05	0.000523621
RP11-74E24.2	21.1005	-2.4144	3.57058e-05	0.000523972
NOD1	206.394	-1.13964	3.56836e-05	0.000523972
COL8A2	197.663	-2.64795	3.5906e-05	0.000526206
TAC1	7.35564	-5.5572	3.58921e-05	0.000526206
KLRD1	13.9273	-3.77122	3.59676e-05	0.000526757
TNFSF11	6.80772	-4.85588	3.60078e-05	0.000526995
AC017035.2	3.58345	-3.38135	3.64188e-05	0.000532301
CYP24A1	77.0642	-5.06746	3.64182e-05	0.000532301
XIRP1	26.4938	-2.81709	3.64832e-05	0.000532668
RP11-798G7.7	1.85026	-4.54284	3.64924e-05	0.000532668
STEAP1	36.9216	-2.5191	3.65734e-05	0.000533141
COX16	77.5524	-1.42794	3.6568e-05	0.000533141
RP3-525N10.2	5.40006	-5.83355	3.66811e-05	0.000534357
RNF133	6.01473	-3.32233	3.67604e-05	0.000535157
LAMC2	118.304	-3.75468	3.6829e-05	0.000535801
RP11-63K6.1	4.17939	-2.54774	3.70658e-05	0.00053889
LA16c-313D11.12	14.0785	-2.80517	3.71615e-05	0.000539923
TMEM60	18.5536	-1.19236	3.72398e-05	0.000540703
ZPLD1	32.3496	-8.10266	3.75917e-05	0.000545453
AC106876.2	10.6017	-6.09208	3.7628e-05	0.000545619
BDH1	77.1254	-2.01793	3.78225e-05	0.000546986
TFEB	41.8315	-1.8027	3.78717e-05	0.000546986
ATP8A2	266.837	-3.55935	3.78504e-05	0.000546986
AC009120.6	6.23579	-2.6835	3.78399e-05	0.000546986
AC079210.1	19.1261	-2.54502	3.77759e-05	0.000546986
RP11-129B9.2	3.1556	-2.65602	3.79122e-05	0.000547211
ZNF503	49.2303	-2.04098	3.81216e-05	0.000549873
PTGER4	33.4327	-1.99819	3.82232e-05	0.000550615
RCN3	39.3476	-1.52957	3.82039e-05	0.000550615
STK3	488.572	-1.04555	3.83136e-05	0.000551217
LINC00610	17.6667	-2.01467	3.83152e-05	0.000551217
ANXA9	41.2492	-1.45467	3.85181e-05	0.000553112
GDF7	9.74325	-5.28667	3.85728e-05	0.000553112
SOWAHB	6.37026	-4.88678	3.85489e-05	0.000553112
KCNV1	14.9895	-6.05596	3.84781e-05	0.000553112
ADORA2A-AS1	21.6091	-2.4835	3.85528e-05	0.000553112
AP4B1-AS1	11.8624	-2.12735	3.87451e-05	0.000554646
ART5	5.43122	-3.8838	3.87556e-05	0.000554646
LL22NC03-2H8.5	7.07387	-4.83119	3.87471e-05	0.000554646
FAM105A	99.4032	-1.31568	3.8786e-05	0.00055472
OBSCN	3992.03	-2.3526	3.91818e-05	0.000560017
KRT18P61	6.08609	-2.55037	3.94069e-05	0.000562868
MGP	682.129	-2.88312	3.97141e-05	0.000566888
HNRNPA1P72	3.42742	-3.17948	3.9821e-05	0.000568044
RP11-180P8.1	1.38041	-3.62792	3.98761e-05	0.00056846
RP11-1102P16.1	14.6322	-3.36855	4.03058e-05	0.000574184
H2AFJ	48.9431	-1.82881	4.03298e-05	0.000574184
RP11-666A8.1	3.22134	-2.63082	4.0432e-05	0.000575266
VGLL4	462.228	-0.779604	4.06227e-05	0.000577604
FTH1P24	1.32309	-4.38554	4.07384e-05	0.000578744
RP1-182O16.2	2.78721	-3.71122	4.07555e-05	0.000578744
RP11-432A8.2	1.7137	-4.19251	4.07831e-05	0.000578762
CTD-2260A17.2	15.4587	-2.28625	4.09209e-05	0.000580343
SAMD3	28.7001	-2.82346	4.11118e-05	0.000582674
RP11-213G2.1	5.81498	-3.0229	4.11422e-05	0.000582729
RPS17	15.5669	-3.3235	4.12042e-05	0.000582988
NPM1P43	2.49883	-3.62864	4.13499e-05	0.000584539
AC003080.4	2.69078	-3.2198	4.15795e-05	0.000587031
MFAP1P1	2.45487	-5.03748	4.18196e-05	0.00059004
RP11-393N4.2	2.25711	-3.47928	4.18654e-05	0.000590308
ITGA10	363.316	-1.82291	4.23388e-05	0.0005966
HS1BP3	119.849	-1.18337	4.24261e-05	0.000596806
RP11-473P24.2	1.83167	-3.93498	4.2419e-05	0.000596806
ALOX12P2	14.4125	-4.01484	4.24349e-05	0.000596806
DUSP11	289.03	-0.564774	4.25117e-05	0.000597503
F13A1	829.596	-2.48528	4.26178e-05	0.000598611
RP11-56A10.1	23.5734	-3.11013	4.27227e-05	0.000599318
FBL	597.859	-1.24949	4.27041e-05	0.000599318
SLC7A8	166.954	-2.49916	4.30251e-05	0.000602472
HS3ST3B1	21.3712	-2.83232	4.30178e-05	0.000602472
RPL21P121	1.30239	-3.73393	4.30298e-05	0.000602472
SEMA4C	329.968	-1.11607	4.31327e-05	0.000603528
LRRK1	238.449	-1.53326	4.31658e-05	0.000603607
IMPG1	25.6695	-2.86214	4.33951e-05	0.000606428
HILS1	4.38486	-4.45689	4.35382e-05	0.000607687
KRT18P62	6.11899	-2.47641	4.35406e-05	0.000607687
RP11-618P13.1	4.1486	-6.2372	4.36757e-05	0.000608799
PDE11A	40.0179	-3.41808	4.37314e-05	0.000609189
KCNF1	7.13362	-3.85323	4.39857e-05	0.000612344
VKORC1L1	110.341	-0.975155	4.44393e-05	0.000618266
PRICKLE2-AS3	14.3583	-2.38995	4.45225e-05	0.000619032
CIDECP	21.2331	-1.797	4.46971e-05	0.000620674
PMEL	32.6384	-1.94529	4.46751e-05	0.000620674
DUSP19	40.7582	-1.93336	4.50068e-05	0.000623791
RP11-401P9.4	8.57995	-4.16625	4.49992e-05	0.000623791
MDP1	4.63241	-2.95227	4.50519e-05	0.000624023
B3GAT2	29.0646	-2.80704	4.50809e-05	0.000624031
DFFA	213.322	-0.714973	4.51386e-05	0.000624436
XXbac-B476C20.9	17.7336	-1.78814	4.51697e-05	0.000624473
CTC-458A3.1	1.1135	-3.92361	4.52287e-05	0.000624502
CTD-2368P22.1	85.6531	-1.53481	4.56719e-05	0.000630226
CTD-3051D23.1	9.24225	-3.75086	4.61227e-05	0.000635649
SRMP2	1.74619	-5.177	4.61518e-05	0.00063565
RP11-466P24.2	14.2767	-1.95002	4.62125e-05	0.00063569
MTUS2	69.8463	-2.91969	4.62091e-05	0.00063569
NANOG	13.0532	-2.34011	4.6264e-05	0.000636
IER2	35.6171	-1.76567	4.6436e-05	0.000637966
RTN4RL2	14.0573	-2.37882	4.68447e-05	0.000643177
TMEM44	124.395	-1.29266	4.70565e-05	0.00064528
RP11-129B9.1	9.04856	-1.88429	4.70332e-05	0.00064528
DHRS3	182.805	-1.82091	4.73083e-05	0.000647666
AC107081.5	3.49301	-2.98403	4.7319e-05	0.000647666
LIN52	58.3045	-1.2212	4.73057e-05	0.000647666
RP11-204M4.2	13.5201	-1.9722	4.75671e-05	0.000650656
RP11-577N1.2	3.2461	-5.10281	4.76824e-05	0.000651828
TMEM30B	11.484	-4.34068	4.77192e-05	0.000651925
DAAM2	407.987	-1.78371	4.78067e-05	0.000652714
RP4-622L5.7	4.76496	-3.16438	4.8084e-05	0.000655279
NECAP1	427.7	-0.788435	4.81066e-05	0.000655279
POLR2F	211.934	-1.05743	4.81139e-05	0.000655279
SFT2D2	557.738	-1.18525	4.8232e-05	0.000655668
MFAP5	7.02344	-6.05982	4.81776e-05	0.000655668
NUDT11	31.0714	-2.18288	4.82235e-05	0.000655668
SIRPB2	27.6155	-2.26642	4.83348e-05	0.000656659
RP11-709A23.2	5.91641	-2.35168	4.84275e-05	0.000657512
KRT8P5	2.69817	-6.03717	4.86081e-05	0.000659556
C1QTNF2	8.21304	-3.25997	4.88851e-05	0.000662906
VGLL3	39.8947	-3.48888	4.89564e-05	0.000663463
FBXO41	60.2988	-1.91816	4.90509e-05	0.000664335
IL2RB	19.0138	-2.76896	4.91154e-05	0.000664798
LGALS8-AS1	3.67563	-3.92697	4.92041e-05	0.000665527
AMBN	3.48422	-6.35789	4.9252e-05	0.000665527
RP11-295D4.1	7.66562	-2.91018	4.92601e-05	0.000665527
GNG11	35.785	-1.77225	4.9332e-05	0.000666089
MARVELD3	24.18	-3.06312	4.93653e-05	0.000666128
APOC2	5.56954	-2.68936	4.97027e-05	0.00067027
CHCHD7	78.1632	-1.73305	5.01143e-05	0.000675406
OTUD1	76.0439	-1.21123	5.01467e-05	0.000675428
RP11-179A16.1	3.05768	-7.27117	5.02483e-05	0.000675997
ASS1P5	2.70009	-4.67563	5.02505e-05	0.000675997
RP11-305K5.1	1.78864	-3.42873	5.04511e-05	0.000677865
P2RY4	12.7723	-1.92468	5.07371e-05	0.000681291
RP11-83J16.3	4.83297	-2.91734	5.09344e-05	0.000683523
TUG1	21.5236	-3.38286	5.1114e-05	0.000685096
RP11-267J23.1	22.2186	-1.65653	5.12165e-05	0.000686052
PPP3R1	60.0845	-1.13694	5.18892e-05	0.000693831
PAPSS1	732.819	-0.790213	5.1892e-05	0.000693831
CA5A	4.96889	-3.25149	5.19272e-05	0.000693878
GHRHR	7.74789	-3.98071	5.26596e-05	0.000702387
SYNPO2L	56.2396	-1.58207	5.26918e-05	0.000702387
COL3A1	11521.3	-2.63421	5.29849e-05	0.000705866
RP11-511B23.2	3.91941	-5.313	5.30208e-05	0.000705915
CTD-2184D3.1	1.89832	-2.92782	5.33589e-05	0.000709987
HTR1B	6.63752	-2.93782	5.36453e-05	0.000712933
CLEC12A	14.559	-2.77204	5.36151e-05	0.000712933
OSM	6.37273	-3.60283	5.36844e-05	0.000713022
PARS2	30.4267	-1.23915	5.39398e-05	0.000715549
AL133373.1	6.08953	-4.52861	5.39243e-05	0.000715549
GSDMB	138.764	-1.40081	5.40318e-05	0.000716338
ZSCAN12P1	8.78492	-2.43864	5.42012e-05	0.000718149
RPS2P55	3.25173	-3.00123	5.42684e-05	0.000718607
RP11-12M9.3	4.85143	-1.72891	5.43117e-05	0.000718747
GRAPL	4.22623	-4.90615	5.45875e-05	0.000721961
SIGIRR	52.346	-1.93282	5.46499e-05	0.000722352
PCDHB14	426.913	-1.71479	5.50875e-05	0.000727261
RP11-983P16.2	1.26546	-4.50938	5.52083e-05	0.000728419
RP11-259F16.3	1.54032	-3.03134	5.53173e-05	0.000729417
RP11-613M10.9	11.4104	-2.54404	5.54718e-05	0.000730141
MSLN	8.88154	-3.20372	5.54506e-05	0.000730141
LLPH	19.8932	-1.78351	5.5789e-05	0.000733876
AC005003.1	13.4357	-1.86683	5.59877e-05	0.000736049
YY1P1	2.17011	-3.75142	5.6505e-05	0.000742405
CTD-2270N23.1	30.7253	-1.63685	5.65969e-05	0.000743169
KCTD4	35.7124	-1.42503	5.66939e-05	0.000743997
U2AF1L4	31.5853	-1.4471	5.6873e-05	0.000745457
AF196972.4	2.98043	-4.50177	5.6842e-05	0.000745457
MOV10L1	33.0599	-2.99183	5.70553e-05	0.0007474
SYTL1	50.1693	-2.59104	5.72083e-05	0.000748552
SNX5P1	6.85004	-2.39855	5.74127e-05	0.00075063
MYO1H	40.5134	-2.09002	5.74385e-05	0.00075063
ACVR1C	33.9709	-3.07354	5.75537e-05	0.000750838
RP1-142L7.5	5.12191	-3.62022	5.75569e-05	0.000750838
EIF4A2P2	6.11807	-2.29908	5.75234e-05	0.000750838
IGBP1-AS2	4.23875	-2.43317	5.76198e-05	0.000751211
EPCAM	121.274	-4.00173	5.76749e-05	0.000751485
FGD3	55.7592	-1.71675	5.77435e-05	0.000751573
PTGES	6.2945	-4.30335	5.7887e-05	0.000751573
PAH	55.3298	-2.98678	5.78155e-05	0.000751573
MT2A	975.136	-1.86715	5.7852e-05	0.000751573
JUP	291.644	-1.54597	5.77991e-05	0.000751573
NKG7	4.07812	-2.8219	5.78603e-05	0.000751573
TSLP	11.1744	-3.97064	5.81258e-05	0.000754113
hsa-mir-335	15.3864	-2.52235	5.81513e-05	0.000754113
HLX	32.4492	-2.03295	5.83265e-05	0.000754866
FRAS1	176.532	-2.9687	5.82467e-05	0.000754866
FUT4	42.6848	-1.93763	5.83167e-05	0.000754866
SLITRK6	25.3517	-6.04647	5.83468e-05	0.000754866
CREBL2	172.751	-0.720322	5.86397e-05	0.000757763
RP11-284B18.3	6.81304	-2.5707	5.86339e-05	0.000757763
RP11-256L11.3	1.75987	-3.9779	5.94278e-05	0.000767495
RPL35	1986.47	-1.40781	5.95439e-05	0.000768543
PRAP1	2.55666	-4.33706	5.96987e-05	0.000770089
OR8S1	5.70207	-6.25377	6.02744e-05	0.000777059
HRH1	37.6941	-2.30478	6.04051e-05	0.000778287
RPL30P13	1.0237	-3.90036	6.08459e-05	0.000783507
VTI1BP1	2.29163	-3.4859	6.13317e-05	0.000788837
GNAT3	2.71981	-4.6064	6.15157e-05	0.000789988
AKR1C6P	2.22279	-4.58983	6.15162e-05	0.000789988
RP11-143J12.3	2.17062	-3.18222	6.1529e-05	0.000789988
KCNMB2	24.949	-2.23448	6.18229e-05	0.000793297
SAP30L	133.586	-0.918968	6.18776e-05	0.000793536
RP11-439L8.2	2.62282	-5.21465	6.21151e-05	0.000795653
DESI2	156.117	-1.11351	6.23168e-05	0.000797771
RP11-244F12.1	2.49155	-3.9921	6.24067e-05	0.000798456
NPM1P11	1.71824	-5.05697	6.32255e-05	0.000807992
HNRNPA1P26	5.1267	-2.57256	6.33171e-05	0.000808692
AC006486.1	8.58107	-3.04099	6.35625e-05	0.000811354
RP11-776H12.1	4.26616	-4.35787	6.38581e-05	0.000814106
PPAPDC1A	20.8553	-3.75508	6.39263e-05	0.000814106
PODNL1	23.9862	-2.31573	6.39236e-05	0.000814106
RP11-351M16.1	1.75923	-5.17517	6.43754e-05	0.000819118
AP001429.1	1.38472	-4.14684	6.43944e-05	0.000819118
RANP6	1.79029	-3.62945	6.45964e-05	0.000821211
SZT2-AS1	2.12088	-3.61358	6.48012e-05	0.000822387
DUXAP7	2.34802	-3.40455	6.47801e-05	0.000822387
PRRG3	17.3716	-3.99367	6.47652e-05	0.000822387
CNBD1	5.2179	-5.61969	6.49733e-05	0.00082362
DBH	12.5301	-2.91112	6.49402e-05	0.00082362
ZNF667	261.686	-0.754494	6.53765e-05	0.000827776
SERBP1P5	17.7957	-1.66418	6.55494e-05	0.000829487
LINC00969	138.202	-1.66932	6.56581e-05	0.000830384
RP4-809F4.1	1.75253	-5.43066	6.6253e-05	0.000836464
CTD-2587H19.3	0.944894	-3.94713	6.65287e-05	0.000839462
MFSD9	69.8174	-1.07435	6.67548e-05	0.000841517
RP11-1E11.1	1.45398	-5.02758	6.67682e-05	0.000841517
HESX1	19.9225	-1.42339	6.68786e-05	0.000842425
CCR8	6.08005	-3.18664	6.69858e-05	0.000843292
EIF4A1P10	8.15136	-2.03309	6.72397e-05	0.000846003
GMEB1	233.781	-0.716112	6.74117e-05	0.000846879
CCDC12	209.311	-1.1021	6.74613e-05	0.000846879
AFG3L1P	100.148	-1.46054	6.7425e-05	0.000846879
MYO1D	526.766	-1.98607	6.74635e-05	0.000846879
RP4-665N4.8	1.54913	-4.52595	6.75306e-05	0.000847238
RP11-274E7.2	3.81976	-2.53742	6.78212e-05	0.000848943
RPSAP41	1.72641	-4.9949	6.77641e-05	0.000848943
AP000892.4	2.75545	-2.37288	6.77957e-05	0.000848943
TTC22	17.6561	-3.84688	6.79221e-05	0.000849723
SHOX2	39.8765	-5.87579	6.83747e-05	0.000852305
GPR110	20.7348	-7.61803	6.84001e-05	0.000852305
TRGV5	3.73833	-3.84745	6.82319e-05	0.000852305
TTC39B	164.223	-1.7137	6.82722e-05	0.000852305
ZCCHC24	31.546	-2.16543	6.82859e-05	0.000852305
C1QTNF4	7.80496	-2.83743	6.82688e-05	0.000852305
CTD-2126E3.5	3.86409	-3.71052	6.83358e-05	0.000852305
MBOAT1	74.616	-2.1516	6.8676e-05	0.000855257
TCEB1P31	3.25561	-2.17351	6.87328e-05	0.000855481
AC006994.1	2.3506	-3.75849	6.89525e-05	0.000857243
OR7E22P	2.37437	-4.59864	6.89228e-05	0.000857243
CCDC27	9.10931	-2.91832	6.90832e-05	0.000858382
ISG20	52.4958	-2.0513	6.92674e-05	0.000860185
GPR61	13.6407	-3.84348	6.93127e-05	0.000860261
WASH5P	21.6313	-3.45311	6.94279e-05	0.000860738
MRPL33	223.105	-1.30042	7.05051e-05	0.000871523
AC010240.2	3.90519	-3.45052	7.0512e-05	0.000871523
TPH1	51.5636	-1.8161	7.05327e-05	0.000871523
ANPEP	166.953	-2.06801	7.04493e-05	0.000871523
TLK2P1	27.4121	-1.78526	7.05375e-05	0.000871523
SPDYE8P	10.1809	-3.59101	7.08382e-05	0.000874255
CHRNA3	14.8785	-3.62226	7.08049e-05	0.000874255
RAB8A	177.073	-0.902457	7.09223e-05	0.000874801
AC079753.4	2.64801	-3.25802	7.10321e-05	0.000875664
ARSJ	48.0975	-2.54159	7.10852e-05	0.000875827
GAPDHP20	1.82756	-5.74156	7.11641e-05	0.000876307
RP11-463O9.1	3.50992	-2.70819	7.12414e-05	0.000876768
CHCHD5	41.1005	-1.32708	7.19937e-05	0.000885035
CTD-2290P7.1	2.29366	-4.91059	7.22618e-05	0.000887833
RPL14P1	40.4125	-1.42124	7.24469e-05	0.000889611
RPS15P5	2.03205	-3.39672	7.27485e-05	0.000892317
VAMP8	82.9246	-1.86376	7.30149e-05	0.000895085
PLGLB1	16.0856	-2.41148	7.32488e-05	0.000897451
PSD4	96.1501	-2.10621	7.34222e-05	0.000899065
APOL4	67.239	-2.37695	7.34624e-05	0.000899065
KLHL31	26.3641	-3.24845	7.35978e-05	0.000900221
RP11-1212A22.4	13.3225	-3.07315	7.37287e-05	0.000901319
C1QTNF3	29.0756	-1.94787	7.44821e-05	0.000910024
SERBP1P3	3.83047	-2.70898	7.48298e-05	0.000913764
RP11-1348G14.1	4.41194	-2.14921	7.52132e-05	0.000917935
LRRC25	13.8967	-2.19786	7.53429e-05	0.000919008
ARHGEF35	11.1222	-5.2471	7.54193e-05	0.000919429
RP11-393I2.2	6.16271	-2.14347	7.56363e-05	0.000921563
EVC2	352.402	-1.58381	7.58598e-05	0.000923774
AC006465.4	8.81902	-1.73104	7.60486e-05	0.000925047
OR2C1	3.84955	-3.00698	7.60297e-05	0.000925047
SLC30A4	86.7203	-1.27685	7.63329e-05	0.000927992
FRMD6	374.916	-1.73239	7.65431e-05	0.000929519
ATOX1	139.752	-1.00075	7.72146e-05	0.000937155
GAS1	63.5026	-1.87391	7.76998e-05	0.000942522
TAPSAR1	7.38572	-3.08263	7.77767e-05	0.000942936
PLEKHJ1	50.5827	-1.47135	7.7846e-05	0.000943254
PDCL	147.046	-0.948724	7.80501e-05	0.000945207
CTC-438O3.1	2.21772	-4.35333	7.81935e-05	0.000945638
RP11-770J1.3	4.61821	-2.72674	7.82579e-05	0.000945638
ZBTB25	240.3	-0.902008	7.81488e-05	0.000945638
BOD1L2	5.76952	-8.61154	7.82486e-05	0.000945638
PRSS46	2.40514	-4.66051	7.83255e-05	0.000945934
RPL35P3	1.39434	-3.15513	7.86786e-05	0.000949155
AL645728.1	5.71462	-2.41151	7.90587e-05	0.000952949
ANKLE1	24.3997	-2.00026	7.91093e-05	0.000952949
TBX19	166.985	-1.2164	7.92047e-05	0.000953408
ABRACL	14.6115	-1.95338	7.93078e-05	0.000954126
CPE	2356.18	-1.60136	7.94514e-05	0.00095533
ZNF467	17.1154	-2.00805	7.99155e-05	0.000960385
HIST2H2BE	2270.93	-1.72526	8.00366e-05	0.000960982
FAM188B2	2.37288	-4.7571	8.00527e-05	0.000960982
NT5C1B	19.3238	-2.77969	8.02992e-05	0.000963008
HMGB1P5	25.3479	-1.88645	8.03092e-05	0.000963008
RP11-674J14.3	1.77939	-4.01623	8.04281e-05	0.000963909
APOL5	3.73001	-3.93504	8.0624e-05	0.000965729
RP11-436I9.3	2.47225	-4.29482	8.08508e-05	0.000967918
EIF4BP7	20.6907	-1.96272	8.1722e-05	0.000977284
SLC16A8	18.4452	-1.67281	8.18442e-05	0.000978211
SMARCE1P2	2.23651	-5.55522	8.21214e-05	0.000980991
GPR160	38.7395	-1.6699	8.22732e-05	0.00098202
AC002366.3	3.99423	-3.21577	8.22969e-05	0.00098202
RP4-710M16.1	1.93158	-4.94434	8.23821e-05	0.000982502
LRP6	3575.98	-0.678928	8.25493e-05	0.000983608
BATF	6.71296	-3.69607	8.26091e-05	0.000983608
RP11-661O13.1	5.54092	-2.04037	8.25935e-05	0.000983608
RPL13AP7	5.3409	-1.97685	8.30678e-05	0.000988533
F13B	5.60165	-4.5297	8.31699e-05	0.000989213
PRR16	24.4504	-1.98911	8.33597e-05	0.000990934
RP11-440L14.1	5.30894	-3.31651	8.36674e-05	0.000994054
AC018766.4	3.82477	-2.46329	8.39088e-05	0.000996383
RP11-154D3.1	6.14899	-2.01488	8.39717e-05	0.000996409
UBE2MP1	3.47749	-2.09699	8.40017e-05	0.000996409
ST8SIA5	23.0882	-2.67	8.42646e-05	0.000998988
GAPDHP42	2.89442	-3.70195	8.44782e-05	0.00100098
AC012313.1	2.8067	-3.66266	8.45814e-05	0.00100166
C16orf54	7.00974	-3.86252	8.5012e-05	0.00100622
PSAT1P2	2.29742	-4.72839	8.5269e-05	0.00100872
RP11-432F4.2	1.79508	-3.15655	8.53336e-05	0.00100894
RSRC1	220.38	-1.00232	8.54452e-05	0.00100972
CEP170P1	62.506	-1.70221	8.55304e-05	0.00101018
KRT8P4	5.43278	-2.9954	8.56422e-05	0.00101065
AF196970.3	1.85208	-4.97145	8.56621e-05	0.00101065
BNIPL	65.6917	-1.4041	8.58404e-05	0.00101206
PRSS44	3.85684	-3.89376	8.58742e-05	0.00101206
WASH6P	34.1179	-2.34928	8.59517e-05	0.00101243
U47924.31	12.2328	-2.02443	8.61456e-05	0.00101417
TSHZ2	88.2474	-3.3411	8.62018e-05	0.00101429
RPS2P44	1.77214	-4.72742	8.66794e-05	0.00101936
CTD-3110H11.1	2.34166	-3.02505	8.68045e-05	0.00102029
AKR1D1	5.53073	-6.5542	8.80848e-05	0.00103423
HNRNPA1P24	2.65335	-4.10038	8.8507e-05	0.00103765
KNOP1	206.281	-0.938227	8.85174e-05	0.00103765
GGT3P	6.21565	-4.77422	8.85167e-05	0.00103765
RP11-262H14.5	1.47316	-4.17338	8.86401e-05	0.00103853
TBX18	47.6128	-2.93246	8.8692e-05	0.00103859
AC018816.3	8.15803	-2.15167	8.88787e-05	0.00104022
COL1A2	28745.1	-2.54521	8.92811e-05	0.00104437
RPS7P11	52.9615	-1.36266	8.98616e-05	0.0010506
CTD-2583A14.9	1.90852	-5.60072	8.99262e-05	0.0010508
CTD-2630F21.1	9.19826	-1.9121	9.0225e-05	0.00105373
EIF4E3	120.003	-1.81551	9.05656e-05	0.00105714
MATN4	5.44527	-5.96811	9.06709e-05	0.00105781
MTND5P28	2.62379	-7.30672	9.11429e-05	0.00106275
RBM7	111.721	-1.28483	9.12019e-05	0.00106288
SLC9A5	61.3322	-1.77997	9.12651e-05	0.00106305
LHX9	24.4996	-5.56715	9.14449e-05	0.00106458
SLC22A13	14.2524	-2.24491	9.17092e-05	0.00106653
LINC00493	285.086	-1.03802	9.16764e-05	0.00106653
AKR1A1	405.549	-0.796193	9.20653e-05	0.00106984
AURKAPS1	8.57222	-2.43371	9.20914e-05	0.00106984
C9orf41	161.986	-0.909752	9.2895e-05	0.00107811
ENTHD2	49.514	-1.47571	9.29016e-05	0.00107811
AE000662.92	1.64812	-4.83041	9.32314e-05	0.00108137
LEFTY2	5.31312	-4.55996	9.33145e-05	0.00108176
PRB2	16.3697	-2.37265	9.38629e-05	0.00108754
TTC5	327.986	-0.805212	9.49078e-05	0.00109849
SLC16A5	27.6718	-2.3628	9.48875e-05	0.00109849
RP5-1053E7.3	2.16086	-3.02613	9.49614e-05	0.0010985
TRAPPC2L	117.903	-0.97814	9.50529e-05	0.0010985
CD177	7.20102	-4.4732	9.52306e-05	0.00109991
Z83001.1	1.96528	-4.67025	9.53568e-05	0.00110079
DENND1C	30.8578	-2.17602	9.5829e-05	0.0011045
C20orf166-AS1	5.4953	-8.00053	9.57884e-05	0.0011045
CTD-2267D19.3	6.01005	-4.843	9.59906e-05	0.00110578
C9orf129	6.5327	-2.76684	9.6354e-05	0.00110938
HNRNPA1P66	3.65235	-3.0478	9.65326e-05	0.00111086
C1QTNF8	4.0661	-4.36042	9.68326e-05	0.00111373
RSU1P3	2.8922	-3.31998	9.71203e-05	0.00111645
IBA57	69.4655	-1.89705	9.76632e-05	0.00111918
TMEM182	45.4148	-1.52137	9.75466e-05	0.00111918
SLC37A3	448.487	-0.907683	9.76075e-05	0.00111918
AP001877.1	1.71459	-3.96588	9.74649e-05	0.00111918
RP11-253E3.1	1.93323	-3.48837	9.76615e-05	0.00111918
RP11-54D18.2	5.05958	-2.90517	9.78057e-05	0.00112023
PCCA-AS1	1.98668	-4.34708	9.80227e-05	0.00112213
HMGB1P4	1.88798	-3.62819	9.83747e-05	0.00112557
RRM2P2	2.92376	-2.61333	9.87828e-05	0.00112965
SMIM6	7.3461	-1.98085	9.90487e-05	0.00113193
COMTD1	8.9549	-2.31447	9.91662e-05	0.00113227
RP11-140L24.3	3.27841	-2.44874	9.93571e-05	0.00113386
GPT	636.935	-1.86153	9.95518e-05	0.00113549
FCF1P6	2.56337	-4.842	0.000100714	0.00114756
RP4-816N1.6	3.17082	-2.85148	0.00010067	0.00114756
SRMS	6.06302	-2.96869	0.000100798	0.00114792
CCL22	6.02579	-5.20463	0.000100976	0.00114935
C20orf24	24.5652	-1.2371	0.000101047	0.00114956
RP11-551G24.2	8.88144	-2.0701	0.000101166	0.00115021
UBL4A	30.4045	-1.31482	0.000101209	0.00115021
FGD6	721.926	-1.19254	0.000101391	0.00115118
HAO1	3.23326	-5.84534	0.000101399	0.00115118
FNTB	50.5826	-1.43069	0.000101782	0.00115493
CBX3P9	4.23015	-2.02424	0.000102028	0.00115661
RP5-867C24.1	6.68868	-1.89539	0.000102035	0.00115661
STXBP6	29.765	-3.28134	0.000103062	0.00116645
RP11-351M8.1	9.89592	-1.5644	0.000103747	0.00117359
RP11-219C20.1	5.6863	-2.72869	0.000104592	0.00118254
RPS3A	1240.19	-1.32224	0.000104805	0.00118424
TNFSF8	9.48208	-3.04901	0.00010485	0.00118424
COMMD6	188.251	-1.04183	0.0001051	0.00118584
CNOT6LP1	16.7189	-2.04035	0.000105461	0.0011893
MYO7B	68.3422	-2.44135	0.000105969	0.00119381
FAM102B	120.589	-1.42273	0.000106083	0.00119387
RPS11	12010.1	-1.36979	0.000106036	0.00119387
C12orf23	114.194	-1.00645	0.000106199	0.00119456
RP11-69H7.4	2.27873	-3.53694	0.000106257	0.00119461
RP11-451F14.1	1.84021	-4.5707	0.000106809	0.00119967
TMEM92	32.0722	-3.36335	0.000106817	0.00119967
RP11-173M1.8	2.68843	-4.85051	0.000106879	0.00119976
XBP1P1	1.96419	-3.50313	0.000107054	0.00120111
MESTP2	2.05076	-4.57367	0.000107121	0.00120124
RNF217	280.836	-1.10998	0.000107299	0.00120262
PCBP1-AS1	117.162	-1.49193	0.000107869	0.0012084
RP11-611O2.2	1.93492	-3.00418	0.000107997	0.00120922
RP5-1166A24.1	2.39764	-3.12703	0.000109175	0.00122054
HCG22	4.00504	-6.21668	0.000109506	0.00122361
PCAT1	4.94352	-4.80391	0.00010963	0.00122438
RCCD1	47.5879	-1.5533	0.0001098	0.00122565
STYK1	9.46915	-4.16814	0.000110549	0.00123276
CTD-2600O9.1	4.833	-4.45032	0.000110517	0.00123276
TBATA	4.53455	-5.07791	0.00011075	0.00123437
RP4-604A21.1	2.33293	-2.336	0.000111055	0.00123715
GPRIN2	15.3121	-5.71856	0.00011122	0.00123835
RP4-591B8.2	1.29584	-3.84581	0.000111364	0.00123871
TRAF6P1	5.82345	-3.02969	0.000111309	0.00123871
RP11-59H7.1	1.06573	-4.17612	0.000111952	0.00124462
LYRM2	109.326	-1.26554	0.000112402	0.00124899
CTC-558O2.1	6.19933	-6.28459	0.000112527	0.00124975
RAB25	25.2841	-2.61638	0.000112617	0.00125011
RPL9P9	16.3961	-3.01991	0.000113207	0.00125603
FAM105B	160.971	-0.936883	0.000113279	0.00125619
STAG3L5P	56.1948	-1.1894	0.000113424	0.00125717
VDR	27.612	-3.06238	0.000113501	0.00125738
RP11-190A12.7	1.9825	-3.77723	0.000113654	0.00125844
OR2T4	5.066	-7.81717	0.000114038	0.00126205
RP11-343N15.5	3.0066	-4.48616	0.000114191	0.00126312
KRT8P9	3.04347	-4.88155	0.000114555	0.0012665
RP5-1042K10.10	1.60626	-5.45858	0.000115169	0.00127266
RP11-138H11.1	1.42529	-4.27078	0.000115611	0.0012769
CNGB3	21.1043	-2.73557	0.000115936	0.00127984
PPP1R1C	19.081	-3.5081	0.000116007	0.00127998
PTH1R	1496.33	-2.28129	0.000116337	0.00128297
DAB1	77.1633	-2.88264	0.000116755	0.00128694
TULP1	22.9656	-3.05795	0.000116907	0.0012877
PTPN5	25.5195	-3.08038	0.000116999	0.0012877
LL0XNC01-116E7.4	4.18835	-2.86709	0.000117075	0.00128788
IL6STP1	5.59844	-2.20854	0.000117356	0.00129033
DLGAP3	28.3109	-2.96261	0.000117797	0.0012913
RP11-57B24.2	1.51875	-3.51204	0.000117707	0.0012913
TOMM7	821.816	-1.18523	0.000117664	0.0012913
CD6	24.286	-2.71736	0.000117785	0.0012913
RP1-102E24.1	3.18576	-2.16908	0.000117532	0.0012913
EMILIN2	72.1535	-1.8104	0.000117741	0.0012913
SCHIP1	53.8411	-1.80715	0.000117943	0.00129225
RP11-201O14.1	1.52101	-3.94223	0.000118392	0.00129395
ITPR3	515.931	-1.77263	0.000118387	0.00129395
XKR9	17.3202	-2.79747	0.000118326	0.00129395
RP11-10N23.2	2.67707	-3.64699	0.000118212	0.00129395
RP11-464F9.1	7.86095	-5.39693	0.000118387	0.00129395
SETD7	221.504	-1.52481	0.000118619	0.00129578
GLIS3-AS1	3.60817	-2.68478	0.000118805	0.00129672
RP11-160C18.2	5.2729	-4.93561	0.000118823	0.00129672
AC018766.5	6.67207	-2.13694	0.000119069	0.00129876
ZNF503-AS2	12.8012	-3.47454	0.000119197	0.00129952
LILRA3	6.23563	-3.58358	0.000119571	0.0013023
FAM127C	80.2328	-1.1353	0.000119557	0.0013023
CCL21	3.81364	-2.89303	0.000120423	0.00130988
ODCP	8.12088	-2.45544	0.000120532	0.00131017
STARD5	40.1775	-2.04376	0.000121114	0.00131584
FAXC	120.814	-1.90552	0.000121477	0.00131914
LGI4	52.3534	-3.08882	0.000121578	0.00131957
RP11-550I15.1	6.10657	-4.21637	0.000121751	0.0013208
SGK494	58.4946	-1.42461	0.000121854	0.00132127
UBA52	3415.58	-1.21673	0.000122103	0.00132332
GOLGA6L5	233.499	-1.99391	0.0001226	0.00132805
SERPINI1	147.808	-2.21225	0.000122679	0.00132824
MED28	478.441	-0.60099	0.000123007	0.00133115
RP11-57H14.2	1.80502	-3.16119	0.000123548	0.00133634
CMTM7	49.632	-2.00907	0.000123954	0.00134007
COPS8P2	5.72055	-1.86447	0.00012449	0.00134477
RBMXL3	28.4224	-1.92896	0.000124532	0.00134477
HEBP1	74.5476	-1.10828	0.000124864	0.00134594
C12orf44	34.913	-1.35694	0.000124844	0.00134594
CTD-2553L13.7	4.14996	-2.77274	0.000124766	0.00134594
PTAFR	28.1281	-2.21077	0.00012519	0.00134878
CTD-2299I21.1	2.4501	-4.25137	0.000125747	0.00135346
C11orf45	18.6022	-2.42974	0.000125735	0.00135346
GAPDHP33	2.53643	-4.09127	0.000126072	0.00135629
RPL23	4634.66	-1.30437	0.000126306	0.00135814
AC005682.7	2.0496	-3.13365	0.000127816	0.00137371
F2RL3	23.9062	-2.30267	0.000127929	0.00137425
CYP1B1	887.995	-3.68929	0.000127996	0.0013743
CTC-498J12.3	2.9179	-4.22361	0.00012849	0.00137843
PTGES3P4	1.43787	-2.88635	0.000128507	0.00137843
RP1-102K2.8	3.19476	-3.541	0.000128741	0.00138028
RP11-76E16.2	8.70731	-2.41158	0.000129407	0.00138674
C14orf28	40.1792	-1.4417	0.000129772	0.00138997
AC007390.5	75.6484	-1.24615	0.000129966	0.00139002
AC097721.1	7.80319	-2.11765	0.00012993	0.00139002
REPS2	307.322	-1.57894	0.000129909	0.00139002
RP11-379B18.5	52.8717	-1.40112	0.000130267	0.00139255
NRIP3	34.1019	-2.08627	0.000130468	0.00139402
ITGB3BP	131.126	-1.08853	0.000130916	0.00139813
GBGT1	22.3698	-2.16393	0.000131119	0.00139962
DNM3OS	1.70238	-5.0418	0.000131582	0.00140388
SNHG6	9.53185	-1.96922	0.000132808	0.00141628
TBR1	27.9693	-3.60898	0.000132962	0.00141681
SORCS1	255.143	-2.32711	0.000132988	0.00141681
RP11-1149O23.1	2.45481	-3.09195	0.000133098	0.00141731
RP1-180M12.1	1.96038	-3.07749	0.000133427	0.00142012
LGALSL	71.4654	-1.71172	0.00013357	0.00142095
RP11-807E13.3	1.70234	-4.15158	0.000134026	0.00142511
TEX36	2.47444	-5.6806	0.000134366	0.00142804
RP11-171I2.2	10.5783	-2.65024	0.000135446	0.00143812
MFSD3	160.306	-1.76446	0.000135437	0.00143812
ZNF37BP	260.244	-1.00372	0.000135702	0.00144015
RP11-313P13.5	1.5519	-4.73566	0.000135887	0.00144072
CBX1P2	4.35699	-2.29161	0.000135887	0.00144072
RP11-555K12.1	2.42487	-3.48649	0.000136545	0.001447
KLRG1	29.2733	-1.73418	0.000136756	0.00144783
ACSM5	36.4831	-2.52562	0.000136747	0.00144783
STXBP2	103.221	-1.86384	0.000137078	0.00145054
RPL23AP50	1.93489	-3.07714	0.000137219	0.00145134
RPS3AP43	4.35606	-2.56172	0.000137542	0.00145406
PGAM4	19.3008	-1.67767	0.000138091	0.00145916
GLULP4	5.35639	-2.70879	0.00013828	0.00146045
PHLDA2	7.00641	-3.12962	0.000138531	0.0014624
KHDC1	24.843	-1.78431	0.000138657	0.00146302
RP11-530A18.1	6.32164	-2.3114	0.00013878	0.00146362
PRKAG3	11.5959	-3.33092	0.000138909	0.00146427
RP11-543P15.1	9.35648	-1.8827	0.000139001	0.00146455
C6orf123	4.23733	-5.25517	0.000139074	0.00146461
AC025335.1	28.1623	-1.54139	0.000139637	0.00146983
ZNF136	316.211	-0.751076	0.000140424	0.00147671
RP11-101E13.5	3.02212	-2.66982	0.000140751	0.00147943
KRTAP16-1	2.74513	-6.35719	0.000141407	0.00148562
DUTP7	1.08742	-4.48793	0.00014213	0.00149178
MYO1G	78.7241	-1.79599	0.000142087	0.00149178
AC011322.1	4.06543	-3.7593	0.000142574	0.00149573
RPS23P1	1.22579	-3.66422	0.000143038	0.00149988
BTF3L4P2	21.8152	-1.5406	0.000143171	0.00150057
ALG14	137.01	-1.44036	0.000143802	0.00150646
ORC2	453.934	-0.493771	0.000143927	0.00150705
R3HDM2P1	5.53333	-3.73771	0.000144152	0.00150796
SPIN4	63.8565	-1.07114	0.000144402	0.00150986
TCEA1P4	1.84072	-4.562	0.00014453	0.00151032
AC007292.6	3.91189	-2.48275	0.000144583	0.00151032
ZNF829	146.169	-0.992281	0.000145749	0.00152177
PRSS3	35.0192	-1.78959	0.000146692	0.00152944
KLF4	95.2962	-1.63508	0.000146667	0.00152944
SERPINA4	4.49245	-6.62222	0.000146593	0.00152944
AC005519.4	2.62388	-5.26334	0.000147057	0.00153252
MXRA5P1	20.6189	-4.28284	0.000147452	0.00153591
PLEKHA8P1	27.0491	-1.62892	0.000147575	0.00153646
AC010642.1	26.0263	-2.01589	0.00014788	0.0015389
KCNJ13	62.4178	-1.13909	0.000148545	0.00154509
MZT2A	100.943	-1.29457	0.000149595	0.00155527
RP11-230B22.1	2.186	-6.15481	0.00014982	0.00155576
DBF4P1	5.07491	-3.96848	0.000149715	0.00155576
REXO2	141.922	-1.04121	0.000149853	0.00155576
RP1-209B5.2	8.45851	-1.99165	0.00015041	0.00156076
RP11-795H16.2	3.27036	-5.19551	0.000150478	0.00156076
MTHFS	8.87235	-2.63182	0.000150826	0.00156217
POU2F2	56.3148	-1.95355	0.000150801	0.00156217
HAND2-AS1	16.3882	-7.84139	0.000150945	0.00156266
VILL	122.561	-1.44288	0.000151835	0.00157083
TTLL12	160.483	-0.875062	0.000152146	0.00157213
RP11-809F4.2	5.15732	-2.60237	0.000152635	0.00157644
PRSS45	9.09133	-3.92269	0.000153019	0.00157967
RP11-464F9.21	2.61294	-3.65029	0.000153256	0.00158137
RP1-28C20.1	7.43094	-2.81168	0.00015353	0.00158345
DYNC1I2P1	20.5328	-1.42564	0.000153959	0.00158712
AQPEP	33.4626	-2.35285	0.000154965	0.00159675
RP11-235P11.1	2.80353	-2.74035	0.000155493	0.00160144
EIF4EBP3	4.01719	-2.35647	0.00015572	0.00160152
JARID2	578.713	-0.919296	0.000155588	0.00160152
GAL3ST1	13.2041	-2.76501	0.000155718	0.00160152
HNRNPUL2	72.1173	-1.28299	0.000155863	0.00160225
CD8BP	1.68765	-6.09712	0.000156363	0.00160664
MRPL41	15.8894	-1.28977	0.000157112	0.00161283
CTB-134H23.2	13.9745	-2.28047	0.000158067	0.00162111
FREM3	32.4185	-2.94931	0.000158926	0.0016284
RP11-53I6.1	1.97528	-2.55555	0.000159292	0.00163139
OR1L8	4.89761	-2.6006	0.000160346	0.00164141
AC074367.1	5.96369	-2.58007	0.000160495	0.00164218
LHX4	66.0963	-1.51794	0.000160583	0.00164231
RP11-571M6.17	1.24795	-4.7905	0.000160753	0.00164329
S100A4	57.7327	-2.61465	0.000160993	0.00164497
PLCL1	121.179	-1.99312	0.000162216	0.00165651
RP4-777O23.2	1.2235	-3.45276	0.000162273	0.00165651
GRASP	156.846	-1.90961	0.000162485	0.0016579
PLSCR2	19.3815	-2.803	0.000162666	0.00165899
RP11-631M6.3	2.42616	-3.02539	0.000163081	0.0016609
RPS4XP13	3.70055	-2.55935	0.00016302	0.0016609
PRRG2	14.0019	-2.30153	0.000162934	0.0016609
FAM204BP	4.44785	-2.61839	0.000163337	0.00166274
CTD-2651B20.3	4.00794	-3.78912	0.000163737	0.00166604
RP1-76B20.11	1.59695	-4.90796	0.000163817	0.00166608
ZNF683	5.80606	-4.37761	0.000164568	0.00167294
MOXD1	658.67	-3.19748	0.000164675	0.00167325
EBP	106.259	-1.04432	0.000165436	0.00168021
ZNF670	106.179	-1.17749	0.000166087	0.00168604
AK4	64.5589	-1.93005	0.000166322	0.00168765
RP11-206L10.2	12.3689	-1.64691	0.000167675	0.00170059
UQCRQ	321.225	-1.20463	0.000168574	0.00170784
POM121L3P	3.16267	-3.96135	0.000168623	0.00170784
CACNG1	6.67941	-2.23789	0.000168712	0.00170796
FAM53A	28.8164	-2.09318	0.000169363	0.00171139
AK4P1	7.5486	-1.74988	0.000169155	0.00171139
SAMD7	5.9928	-4.27428	0.000169535	0.00171234
RAB9B	28.4792	-2.00365	0.000169812	0.00171435
ABT1	63.6931	-1.18323	0.000170131	0.00171678
TBC1D2B	517.191	-0.890761	0.00017047	0.00171942
HFE2	11.2034	-2.74802	0.000170714	0.00172108
DUTP6	1.63207	-3.55944	0.000170936	0.00172253
DYNLL1-AS1	5.50095	-3.71447	0.000171685	0.0017285
GLRA4	7.51945	-4.04672	0.000171652	0.0017285
TPST2P1	3.17426	-3.77378	0.000172265	0.00173354
RPL7P48	1.34364	-5.38743	0.00017259	0.00173601
FOXL2	10.0682	-3.41748	0.000172991	0.00173926
CYS1	8.37363	-3.61944	0.000173116	0.00173971
[truncated: 3,902 more rows]

## Sheet: Cluster 4
Gene	baseMean	log2FoldChange	pvalue	padj
SEC24C	1882.6	-1.70395	4.68721e-08	3.58069e-05
CGNL1	1798.32	-2.87489	2.14505e-07	0.000101961
ERMP1	770.791	-1.91065	5.02201e-07	0.000210629
MUM1	1467.28	-1.43245	1.90039e-06	0.000556841
CNNM2	1051.96	-1.50835	2.40058e-06	0.000666863
SRRM1	3028.77	-1.15922	4.77721e-06	0.00105345
F5	618.938	-4.85199	4.92339e-06	0.0010746
NID2	739.718	-2.21188	4.97423e-06	0.00107474
DAP	436.733	-1.39729	6.94127e-06	0.0014007
TMC3	10.7797	-3.75556	9.21342e-06	0.00167013
ZNF397	1023.53	-0.883944	1.24387e-05	0.00200199
DDHD1	885.889	-1.38405	1.80068e-05	0.00256857
TPM1	3480.43	-2.49051	2.0667e-05	0.00281572
MAPK14	728.472	-0.821033	2.35368e-05	0.00307007
MRPL45P2	224.255	-1.14161	2.39991e-05	0.00309242
HECTD4	6006.81	-1.00133	3.05797e-05	0.00367472
PXDN	1212.99	-2.39582	4.46269e-05	0.00484553
CXCL14	36.3252	-4.96917	4.44816e-05	0.00484553
STRA6	888.282	-5.00959	5.15656e-05	0.00546034
PTPRE	240.568	-2.61357	5.43832e-05	0.00564688
BRPF3	1022.8	-1.11947	5.62785e-05	0.0057052
POU1F1	19.1522	-5.42065	6.25778e-05	0.00619069
EDNRA	250.899	-2.45387	7.35883e-05	0.00666852
H19	3022.9	-4.28238	7.71041e-05	0.0068719
AC116050.1	79.8381	-3.06468	0.000121702	0.00939784
MYO9A	1885.32	-1.08447	0.000132611	0.0099993
ETAA1	332.651	-0.998257	0.000136597	0.0102161
ZNF518A	1531.94	-1.13594	0.00016116	0.0115167
CUX1	1581.46	-0.888342	0.000172522	0.0120597
MIR370	40.7044	-2.736	0.000174177	0.0121357
GLIPR1L1	143.814	-1.40025	0.00018435	0.0126386
HSPG2	7796.44	-1.87932	0.000187038	0.0127007
WDR75	852.959	-0.936784	0.00018868	0.0127314
FAM222B	180.188	-1.15379	0.000192065	0.0128786
RMND1	351.933	-0.874936	0.000208652	0.0136276
LRIG2	978.817	-0.705118	0.00021048	0.0136429
C3orf22	2.79965	-3.08984	0.000222085	0.0140544
C1orf168	53.8563	-4.00252	0.000235925	0.0145012
AK2	2316.01	-1.05664	0.000236767	0.0145113
PLCL2	506.196	-1.54764	0.00025819	0.0153835
MEG3	2074.96	-2.68189	0.000277962	0.0162893
AL132709.8	6.60976	-3.17692	0.000284374	0.0164645
SH3TC2	130.147	-2.8682	0.000297785	0.0169405
KCNIP1	83.7775	-3.14693	0.00030398	0.0171108
ITGB1BP1	408.89	-0.816741	0.000309177	0.0173578
ZNF106	2806.95	-0.743619	0.000318592	0.0175744
PEAK1	3123.2	-1.42951	0.000315686	0.0175744
SMAD5	1360.12	-0.931563	0.000319909	0.0175909
WNT8B	29.5257	-4.39789	0.000322729	0.0176552
STX3	163.892	-1.97213	0.000355059	0.0190822
PPP2R3A	1085.58	-1.34125	0.000397087	0.0202714
MAPK13	54.0806	-2.72327	0.000421011	0.0212392
CATSPER3	45.9438	-2.70423	0.000422865	0.0212825
KIF13A	1515.7	-0.859679	0.00042681	0.0213805
CCKAR	10.4277	-5.02011	0.000463513	0.0226276
MIR938	12.332	-2.36612	0.000464021	0.0226276
ZZZ3	972.573	-0.756848	0.000472661	0.0228222
ASAP2	1336.23	-1.02791	0.000491751	0.0234544
R3HDM2	1096.78	-0.751956	0.000492592	0.0234544
CABLES1	159.193	-2.95093	0.000501076	0.023765
FAM175A	244.474	-1.09503	0.000515774	0.024141
ESCO1	674.266	-1.03787	0.000548661	0.0251303
VPS54	939.048	-0.822721	0.000553792	0.0252034
ISLR	35.7091	-3.82617	0.000558477	0.0252163
MAML3	418.655	-1.76302	0.000631688	0.0268812
RAG1	19.3772	-2.88288	0.000629854	0.0268812
P4HA3	10.9285	-2.37959	0.000632194	0.0268812
SNORD113-2	77.7033	-3.27013	0.000638412	0.0268812
TINAGL1	91.2257	-2.93538	0.000674055	0.0276594
POLI	653.237	-0.968757	0.000674997	0.0276594
PNN	4129.06	-1.20956	0.000683373	0.0278957
ASPN	161.535	-1.58563	0.000702975	0.0284247
NARG2	1230.01	-0.586835	0.000708721	0.0284419
SNORD114-2	77.8225	-3.18568	0.000712774	0.0284764
CRLF3	805.003	-1.07238	0.000753222	0.0293978
GABRE	145.938	-3.02585	0.000783464	0.0301951
OSBPL9	1252.38	-1.00132	0.000786272	0.0302489
RP11-798K3.2	2.19588	-2.87576	0.000790278	0.0303484
SNORD113-6	26.906	-2.90156	0.000796922	0.0303854
SNORD114-27	15.5267	-3.3126	0.000808093	0.0304852
ANKRD36	8419.95	-1.28153	0.000841081	0.0309119
KIAA1328	415.365	-1.00551	0.000845127	0.0309542
SERPINF1	408.212	-2.04909	0.000847146	0.0309751
MYO1D	452.013	-2.07893	0.000880863	0.0318072
IMMP2L	160.777	-1.05645	0.000944464	0.0332271
AQPEP	23.745	-2.13693	0.000962159	0.0337387
SNORD114-16	18.9153	-2.6707	0.000964223	0.0337557
WSCD2	87.7607	-3.73671	0.000971007	0.0339377
ABRA	4.63091	-2.67038	0.000995953	0.0344716
PLEKHM3	361.686	-0.729779	0.00101152	0.0348411
SNORD114-19	30.8721	-2.84379	0.00107402	0.0357838
ZNF638	5291.15	-0.764905	0.00108191	0.0359443
RBBP6	2244.91	-0.748602	0.0011119	0.0363197
RAI14	517.469	-1.58309	0.00117699	0.0379725
YPEL4	190.708	-1.64286	0.00120978	0.0386848
SNORD114-29	46.6706	-2.87594	0.00121172	0.0386848
CLIC3	33.6895	-2.74256	0.0012212	0.0388723
ABCA12	267.741	-1.97272	0.00125847	0.0395282
CLGN	276.429	-1.97352	0.00127417	0.0398141
PRIMPOL	297.48	-0.805414	0.00128786	0.0401566
ATF1	188.924	-0.709836	0.00130074	0.0404401
ZW10	379.875	-0.784844	0.0013052	0.0404611
TNS3	1178.06	-1.6318	0.00132041	0.0406382
ZNF354B	405.195	-0.740048	0.00134233	0.0409593
ANKHD1-EIF4EBP3	6.0135	-1.65186	0.00136537	0.041426
RGAG1	23.1416	-2.45128	0.00136356	0.041426
SHPRH	1749.43	-0.647307	0.00138918	0.0418515
PRPF38AP2	2.32791	-2.71761	0.00139974	0.0421104
SNORD70	7.88567	-1.75123	0.00141354	0.0423983
AL355490.1	10.1488	-1.53279	0.00141784	0.0424162
FAM200B	166.895	-1.1375	0.00145565	0.0431251
EFCAB13	322.51	-1.56132	0.0014586	0.0431528
DCAF16	725.327	-0.811283	0.0014663	0.0432608
MIR1302-3	4.28179	-3.17001	0.00146847	0.0432654
GAS2	56.3886	-2.3714	0.00147427	0.0433589
GTF2H1	547.698	-0.774858	0.00150021	0.0438756
NAA16	648.317	-0.805645	0.00150781	0.0438803
ZNF266	558.141	-0.960205	0.00150734	0.0438803
TH	162.304	-4.31122	0.00154529	0.044427
ATAD5	500.551	-1.29159	0.0015633	0.0448243
ZNF551	891.836	-0.988131	0.00158023	0.0451887
EIF2A	1078.54	-1.03168	0.00162826	0.0462531
SPATA5	506.082	-0.690343	0.00163877	0.0463305
ATP7B	582.038	-1.20749	0.00164298	0.0463305
ZNF204P	86.2149	-1.99104	0.00167499	0.0468954
BFAR	465.977	-0.704042	0.0017168	0.0476106
TBC1D19	885.242	-0.865856	0.00175313	0.0485005
ZC3H7A	1057.16	-0.518102	0.00175745	0.0485005
SNORD101	11.1647	-1.46389	0.00179585	0.049059
